# Supplementary material for: Evidence-informed recommendations for rehabilitation with older adults living with HIV: a knowledge synthesis
Source: PubMed Central journal article supplement — BMJ Open. 2014 May 14;4(5):e004692. doi: 10.1136/bmjopen-2013-004692 (PMC4024604; doi:10.1136/bmjopen-2013-004692), 2014-05-14
Supplement: bmjopen-2013-004692.draft_revisions.pdf [file bmjopen-2013-004692.draft_revisions.pdf]

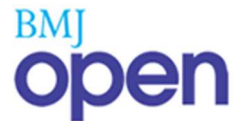

**Developing Evidence-Informed Recommendations in  
Rehabilitation for Older Adults Living with HIV: A  
Knowledge Synthesis**

|                                    |                                                                                                                                                                                                                                                                                                                                                                                                                                                                                                                                                                                                                                                                                                                                                                                                                                                                                                                                  |
|------------------------------------|----------------------------------------------------------------------------------------------------------------------------------------------------------------------------------------------------------------------------------------------------------------------------------------------------------------------------------------------------------------------------------------------------------------------------------------------------------------------------------------------------------------------------------------------------------------------------------------------------------------------------------------------------------------------------------------------------------------------------------------------------------------------------------------------------------------------------------------------------------------------------------------------------------------------------------|
| Journal:                           | <i>BMJ Open</i>                                                                                                                                                                                                                                                                                                                                                                                                                                                                                                                                                                                                                                                                                                                                                                                                                                                                                                                  |
| Manuscript ID:                     | bmjopen-2013-004692                                                                                                                                                                                                                                                                                                                                                                                                                                                                                                                                                                                                                                                                                                                                                                                                                                                                                                              |
| Article Type:                      | Research                                                                                                                                                                                                                                                                                                                                                                                                                                                                                                                                                                                                                                                                                                                                                                                                                                                                                                                         |
| Date Submitted by the Author:      | 15-Dec-2013                                                                                                                                                                                                                                                                                                                                                                                                                                                                                                                                                                                                                                                                                                                                                                                                                                                                                                                      |
| Complete List of Authors:          | O'Brien, Kelly; University of Toronto, Department of Physical Therapy<br>Solomon, Patricia; McMaster University, School of Rehabilitation Science<br>Trentham, Barry; University of Toronto, Department of Occupational<br>Science and Occupational Therapy<br>MacLachlan, Duncan; AIDS Committee of Toronto,<br>MacDermid, Joy; McMaster University, School of Rehabilitation Science<br>Tynan, Anne-Marie; St. Michael's Hospital,<br>Baxter, Larry; Canadian Working Group on HIV and Rehabilitation,<br>Casey, Alan; University of Manitoba, Department of Medicine<br>Chegwidden, William; University College Hospitals NHS Foundation Trust,<br>National Hospital for Neurology and Neurosurgery<br>Robinson, Gregory; Canadian Working Group on HIV and Rehabilitation,<br>Tran, Todd; Women's College Hospital,<br>Wu, Janet; St. Michael's Hospital,<br>Zack, Elisse; Canadian Working Group on HIV and Rehabilitation, |
| <b>Primary Subject<br>Heading</b>: | HIV/AIDS                                                                                                                                                                                                                                                                                                                                                                                                                                                                                                                                                                                                                                                                                                                                                                                                                                                                                                                         |
| Secondary Subject Heading:         | Rehabilitation medicine, Evidence based practice                                                                                                                                                                                                                                                                                                                                                                                                                                                                                                                                                                                                                                                                                                                                                                                                                                                                                 |
| Keywords:                          | HIV & AIDS < INFECTIOUS DISEASES, REHABILITATION MEDICINE, aging,<br>knowledge synthesis, evidence-informed recommendations                                                                                                                                                                                                                                                                                                                                                                                                                                                                                                                                                                                                                                                                                                                                                                                                      |
|                                    |                                                                                                                                                                                                                                                                                                                                                                                                                                                                                                                                                                                                                                                                                                                                                                                                                                                                                                                                  |

SCHOLARONE™  
Manuscripts



1  
2  
3 38 **Corresponding Author**

4  
5 39 Kelly K. O'Brien  
6 40 Department of Physical Therapy  
7 41 University of Toronto  
8 42 160-500 University Avenue  
9 43 Toronto, Ontario M5G 1V7  
10 44 Canada  
11 45 Phone: 1-416-978-0565  
12 46 Fax: 1-416-946-8562  
13 47 Email: [kelly.obrien@utoronto.ca](mailto:kelly.obrien@utoronto.ca)

14  
15  
16  
17 48 **KO** [kelly.obrien@utoronto.ca](mailto:kelly.obrien@utoronto.ca)

18 49 **PS** [solomon@mcmaster.ca](mailto:solomon@mcmaster.ca)

19 50 **BT** [B.Trentham@utoronto.ca](mailto:B.Trentham@utoronto.ca)

20 51 **DM** [dmaclachlan@utoronto.org](mailto:dmaclachlan@utoronto.org)

21 52 **JM** [macderj@mcmaster.ca](mailto:macderj@mcmaster.ca)

22 53 **AMT** [Tynanma@smh.ca](mailto:Tynanma@smh.ca)

23 54 **LB** [larrynbaxter@gmail.com](mailto:larrynbaxter@gmail.com)

24 55 **AC** [acasey@hsc.mb.ca](mailto:acasey@hsc.mb.ca)

25 56 **WC** [will.chegwidden@nhs.net](mailto:will.chegwidden@nhs.net)

26 57 **GR** [kodie@rogers.com](mailto:kodie@rogers.com)

27 58 **TT** [Todd.tran@wchospital.ca](mailto:Todd.tran@wchospital.ca)

28 59 **JW** [wuJ@smh.ca](mailto:wuJ@smh.ca)

29 60 **EZ** [ezack@hivandrehab.ca](mailto:ezack@hivandrehab.ca)

30  
31  
32  
33  
34  
35 61

36 62 **Key Words:** HIV/AIDS, aging, rehabilitation, disability, knowledge synthesis, evidence-informed  
37  
38 63 recommendations

39  
40  
41 64

42 65 **Word Count:** 4268

43  
44 66

45  
46 67  
47  
48  
49  
50  
51  
52  
53  
54  
55  
56  
57  
58  
59  
60

68 **ABSTRACT**

69 **Objective:** Our aim was to develop evidence-informed recommendations in rehabilitation for  
70 older adults living with HIV.

71 **Design:** We conducted a knowledge synthesis, combining research evidence specific to HIV,  
72 rehabilitation and aging, with evidence on rehabilitation interventions for common  
73 comorbidities experienced by older adults with HIV.

74 **Methods** We included highly relevant HIV-specific research addressing rehabilitation and aging  
75 (stream A) and high-quality evidence on the effectiveness of rehabilitation interventions for  
76 common comorbidities experienced by older adults aging with HIV (stream B). We extracted  
77 and synthesized relevant data from the evidence to draft evidence-informed recommendations  
78 on rehabilitation. Draft recommendations were refined based on people living with HIV (PLHIV)  
79 and clinician experience, values and preferences, reviewed by an interprofessional team for  
80 GRADE (quality) rating and revision, and then circulated to PLHIV and clinicians for external  
81 endorsement and final refinement. We then devised overarching recommendations to broadly  
82 guide rehabilitation for older PLHIV.

83 **Results:** This synthesis yielded eight overarching and 52 specific recommendations. Thirty-six  
84 specific recommendations were derived from 108 moderate or high level research articles  
85 (meta-analyses and systematic reviews) that described the effectiveness of rehabilitation  
86 interventions for comorbidities that may be experienced by older adults with HIV.  
87 Recommendations addressed rehabilitation interventions across eight health conditions: bone  
88 and joint disorders, cancer, stroke, cardiovascular disease, mental health challenges, cognitive  
89 impairments, chronic obstructive pulmonary disease, and diabetes. Sixteen specific

1  
2  
3 90 recommendations were derived from 42 research articles specific to rehabilitation for older  
4  
5  
6 91 adults with HIV. The quality of evidence from which these recommendations were derived was  
7  
8  
9 92 either low or very low, consisting primarily of narrative reviews or descriptive studies with small  
10  
11 93 sample sizes. Recommendations addressed approaches to rehabilitation assessment and  
12  
13 94 interventions, and contextual factors to consider with rehabilitation of older adults living with  
14  
15  
16 95 HIV.

17  
18 96 **Conclusions:** These evidence-informed recommendations provide a guide for rehabilitation  
19  
20  
21 97 with older adults with HIV.  
22  
23  
24  
25  
26  
27  
28  
29  
30  
31  
32  
33  
34  
35  
36  
37  
38  
39  
40  
41  
42  
43  
44  
45  
46  
47  
48  
49  
50  
51  
52  
53  
54  
55  
56  
57  
58  
59  
60

1  
2  
3 98 **Strengths and Limitations of this Study**  
4  
5

6  
7 99 ■ We developed evidence-informed recommendations for rehabilitation with older adults  
8  
9 100 living with HIV using a complex knowledge synthesis of two distinct areas of literature  
10  
11 101 while incorporating people living with HIV and clinician preferences throughout.  
12

13  
14 102 ■ Fifty-two recommendations were developed.  
15

16  
17 103 ○ Thirty-six specific recommendations were derived from 108 moderate or high level  
18  
19 104 research articles that described the effectiveness of rehabilitation interventions for  
20  
21 105 comorbidities that may be experienced by older adults with HIV. Recommendations  
22  
23 106 addressed rehabilitation interventions across eight health conditions commonly  
24  
25 107 experienced by older adults living with HIV.  
26  
27

28  
29 108 ○ Sixteen specific recommendations were derived from 42 research articles specific to  
30  
31 109 rehabilitation for older adults with HIV.  
32  
33

34 110 ■ To our knowledge, these are the first evidence-informed recommendations for rehabilitation  
35  
36 111 developed specifically for older adults with HIV.  
37  
38

39 112 ■ Recommendations address approaches to rehabilitation assessment and interventions, and  
40  
41 113 contextual factors to consider with rehabilitation of older adults living with HIV.  
42  
43

44 114  
45  
46  
47

48 115  
49  
50

51 116  
52  
53  
54  
55  
56  
57  
58  
59  
60

## 117 INTRODUCTION

118 As adults age with HIV, more individuals are living with the physical, social and psychological  
119 consequences of the disease, long term treatment, and comorbidities associated with aging [1-  
120 4]. For many, HIV is experienced as a chronic illness whereby individuals experience a range of  
121 health-related challenges known as **disability**, including symptoms and impairments (e.g.  
122 fatigue, weakness, pain), difficulties with day-to-day activities (e.g. household chores),  
123 challenges to social inclusion (e.g. ability to work) and uncertainty or worrying about future  
124 health as they age [5-7]. Premature onset of cardiovascular disease [8], diabetes [8], bone and  
125 joint disorders [9], neurocognitive disorders [10] and non-AIDS-defining cancers [11] further  
126 add to the complexity of disability aging with HIV [12-16]. Rehabilitation has become an  
127 increasingly important strategy to address disability experienced by adults aging with HIV and  
128 specifically older adults living with comorbidities [17].

129 **Rehabilitation** is broadly defined as any service or health provider that may address or  
130 prevent impairments, activity limitations or social participation restrictions experienced by an  
131 individual [17]. Rehabilitation assists in managing the health-related challenges or disability  
132 associated with HIV such as adverse effects of medications, fatigue, pain, neuropathy, mental  
133 health problems, cognitive problems and issues related to income and vocational support.  
134 Rehabilitation approaches such as physical therapy and occupational therapy are well  
135 established in complex chronic disease management and are associated with improvements in  
136 health outcomes in cardiovascular disease [18], stroke [19], and cancer [20]. However,  
137 rehabilitation in the context of HIV is still emerging. Few rehabilitation professionals work with  
138 people living with HIV (PLHIV) highlighting a gap in service provision and need for further HIV

1  
2  
3 139 knowledge, training and clinical guidance [21]. Evidence-informed guidelines are essential to  
4  
5  
6 140 enhance awareness among clinicians, researchers, educators, and PLHIV and to optimize HIV  
7  
8  
9 141 rehabilitation for older adults with HIV.

10  
11  
12 142 No known guidelines specific to HIV rehabilitation and aging exist. Developing evidence-  
13  
14 143 informed recommendations in an emerging area of practice is challenging when high levels of  
15  
16  
17 144 evidence in the form of systematic reviews and meta-analyses are often not available. Such is  
18  
19 145 the case with HIV, which has transitioned from an acute fatal illness to a chronic condition since  
20  
21 146 the advent of combination antiretroviral therapies in the mid-1990s. Combining lower level  
22  
23 147 evidence on emerging issues of HIV and aging with higher level evidence on rehabilitation  
24  
25  
26 148 interventions for other health conditions experienced by older adults with HIV can provide a  
27  
28 149 strong foundation for the development of evidence-informed recommendations. Our aim was  
29  
30  
31 150 to develop evidence-informed recommendations in rehabilitation for older adults living with  
32  
33  
34 151 HIV.

## 37 152 **METHODS**

38  
39  
40 153 We conducted a knowledge synthesis combining two streams of evidence: A) highly relevant  
41  
42 154 HIV-specific evidence addressing rehabilitation and aging and B) high quality evidence on the  
43  
44 155 effectiveness of non-pharmacologic rehabilitation interventions for comorbidities commonly  
45  
46  
47 156 experienced by older adults aging with HIV. Synthesizing this evidence allowed us to consider  
48  
49 157 emerging literature specific to HIV and aging while taking advantage of existing high level  
50  
51  
52 158 evidence on interventions for common conditions experienced by older adults and customizing  
53  
54  
55 159 it to older adults with HIV.



1  
2  
3 160 This research was led by an interdisciplinary team of researchers, educators, health  
4  
5  
6 161 providers with expertise in HIV, aging, and rehabilitation and PLHIV with lived experience of  
7  
8  
9 162 aging with HIV. The team engaged in all aspects of this study including the identification,  
10  
11 163 appraisal and synthesis of the literature, and development and refinement of the evidence-  
12  
13 164 informed recommendations. We incorporated PLHIV values and preferences and clinical  
14  
15  
16 165 expertise throughout [22]. This research received Research Ethics Board approval from  
17  
18 166 McMaster University, Hamilton, Ontario, Canada.  
19  
20

## 21 22 167 **Searching and Identifying the Literature and Data Extraction**

### 23 24 25 168 *Stream A) Evidence specific to HIV, aging and rehabilitation*

26  
27  
28 169 We conducted a synthesis of published literature specific to HIV, aging and rehabilitation. We  
29  
30 170 searched electronic databases including MEDLINE, CINAHL, EMBASE, PsycINFO, from 1980 to  
31  
32 171 December 2010. Search terms included: HIV, aging, and rehabilitation and were altered  
33  
34  
35 172 depending on the database. We included studies that addressed issues related to HIV, aging  
36  
37 173 (older adults 50 years and older) and rehabilitation, and were published in the English language.  
38  
39 174 We defined 'rehabilitation' as any non-pharmacological services, interventions, or providers  
40  
41 175 who address or prevent impairments, activity limitations and social participation restrictions  
42  
43 176 experienced by an individual [17]. Given this is an emerging area of literature; all study designs,  
44  
45  
46 177 including narrative reviews were included.  
47  
48  
49

50  
51 178 *Stream B) High level evidence on rehabilitation interventions specific to comorbidities that may*  
52  
53  
54 179 *be experienced by older adults living with HIV*  
55  
56  
57  
58  
59  
60

1  
2  
3 180 We searched for high-quality evidence (systematic reviews and meta-analyses) on the  
4  
5  
6 181 effectiveness of non-pharmacologic rehabilitation interventions for comorbidities that may be  
7  
8  
9 182 experienced by older adults aging with HIV. We searched electronic databases including  
10  
11 183 MEDLINE, CINAHL, EMBASE, PsycINFO, the Cochrane Database of Systematic Reviews, and the  
12  
13 184 National Guideline Clearinghouse from 1980 to August 2011 for systematic reviews and meta-  
14  
15  
16 185 analyses related to common comorbidities. We included systematic reviews or meta-analyses  
17  
18 186 that addressed one or more comorbidities experienced by adults living with HIV which included  
19  
20  
21 187 but were not limited to: bone and joint disorders, cancer, cardiovascular disease, mental  
22  
23 188 health, neurocognitive decline, cardiopulmonary disease, diabetes and were published in  
24  
25  
26 189 English.

27  
28  
29 190 Five individuals independently reviewed abstracts from Stream A and B evidence to  
30  
31  
32 191 determine their eligibility for inclusion. Where disagreements occurred, the full text was  
33  
34 192 retrieved and a third reviewer determined final inclusion [23]. Two individuals independently  
35  
36  
37 193 reviewed full articles for inclusion. In situations of disagreement reviewers discussed articles to  
38  
39 194 reach consensus on final inclusion. Five individuals independently extracted data from the final  
40  
41  
42 195 group of included evidence onto a data charting form. Data extracted from Stream A evidence  
43  
44 196 included author, year, study location, study purpose, study design, intervention type and  
45  
46  
47 197 comparison group if any, details of the intervention, study populations, sample size, outcome  
48  
49 198 measures, key results, authors' overall conclusions, and reviewers' interpretations of important  
50  
51  
52 199 considerations and recommendations for HIV rehabilitation and aging. Data extracted from  
53  
54  
55 200 Stream B evidence included author, year, study purpose, study design (systematic review or  
56  
57 201 meta-analysis), characteristics of participants, number of included studies, sample size,  
58  
59  
60

1  
2  
3 202 intervention(s) and comparison group (if any), frequency, intensity, time and type of each  
4  
5  
6 203 intervention, outcome measures, key results, overall author conclusions, and reviewers'  
7  
8  
9 204 interpretations of considerations for developing evidence-based recommendations for older  
10  
11 205 adults living with HIV.

## 14 206 **Development of the Recommendations**

16  
17 207 We developed the evidence-informed recommendations using a three-phase iterative process  
18  
19 208 involving 1) classification, grading methodological quality, synthesis of the evidence, and  
20  
21 209 drafting the preliminary recommendations, 2) interprofessional team review, grading and  
22  
23 210 revision of recommendations incorporating values and preferences, and 3) external  
24  
25 211 endorsement and final refinement.  
26  
27  
28  
29

### 30 212 **PHASE 1 - Classification, Grading Methodological Quality, Synthesis and Drafting the**

#### 32 213 **Preliminary Recommendations (Figure 1)**

33  
34  
35 214 Our search yielded a total of 6664 independent citations (2512 from stream A and 4152 from  
36  
37 215 stream B), of which 165 studies (50 studies from Stream A, and 115 studies for Stream B) met  
38  
39 216 our inclusion criteria. Overall, our Phase 1 synthesis yielded 25 recommendations from Stream  
40  
41 217 A evidence, and 49 recommendations from Stream B evidence for a total of 74 preliminary  
42  
43 218 recommendations.  
44  
45  
46  
47

#### 48 219 *Stream A - Evidence specific to HIV, rehabilitation and aging*

50  
51 220 We classified the evidence (n=50 studies) based on 11 concepts to draft the preliminary  
52  
53 221 recommendations ranging from overarching principles for rehabilitation with older adults living  
54  
55 222 with HIV to interventions (Figure 1). We then assessed the methodological quality of each  
56  
57  
58  
59  
60

1  
2  
3 223 included article and the quality of the collective group of evidence from each of the 11 key  
4  
5  
6 224 concepts used to draft each recommendation using GRADE methodological quality criteria [24-  
7  
8 225 28]. Two authors knowledgeable in HIV, aging and rehabilitation (AMT, KO) independently  
9  
10  
11 226 synthesized the extracted data using directed content analysis techniques [29] and formulated  
12  
13 227 key themes surrounding rehabilitation assessment and treatment that informed the  
14  
15  
16 228 recommendations. One author (KO) then drafted 25 preliminary recommendations by  
17  
18 229 synthesizing results and conclusions from each collective group of evidence. Subsequently, two  
19  
20  
21 230 authors (PS, KO) met to review the accuracy of the content analysis and collectively agreed on  
22  
23 231 preliminary evidence-informed recommendations specific to HIV, aging and rehabilitation.

24  
25  
26  
27 232 *Stream B - High level evidence on rehabilitation interventions for common comorbidities*

28  
29 233 We grouped Stream B evidence by comorbidity experienced by older adults living with HIV,  
30  
31  
32 234 followed by the respective intervention. We classified the evidence based on 11 areas (bone  
33  
34 235 and joint disorders; cancer; stroke; cardiovascular disease (CVD); mental health challenges;  
35  
36 236 cognitive impairments; Parkinson's Disease; chronic obstructive pulmonary disease (COPD);  
37  
38  
39 237 diabetes; older adults; HIV) (Figure 1). We assessed the methodological quality of each article,  
40  
41  
42 238 and the quality of evidence from each collective area of focus used to draft each  
43  
44 239 recommendation using the GRADE criteria [24-28]. Two authors (KO, AMT) independently  
45  
46 240 synthesized the recommendations from the meta-analyses and systematic reviews using  
47  
48  
49 241 directed content analysis techniques [29] surrounding assessment, treatment intervention,  
50  
51  
52 242 intensity, progression of intensity, and health outcomes for each comorbidity. One author (KO)  
53  
54 243 then drafted a total of 49 preliminary recommendations from the 115 included articles by  
55  
56  
57 244 synthesizing each collective group of study results and overall conclusions. Two authors (KO, PS)  
58  
59  
60

1  
2  
3 245 met to review the accuracy of the synthesis to collectively determine preliminary evidence-  
4  
5  
6 246 informed recommendations for each of the comorbidities. The resulting 49 recommendations  
7  
8  
9 247 for Stream B spanned 11 areas of focus: bone and joint disorders (6 recommendations); cancer  
10  
11 248 (8); stroke (12); CVD (7); mental health challenges (4); cognitive impairments (3); Parkinson's  
12  
13 249 disease (1); COPD (4); diabetes (1); older adults (2); and HIV (1).  
14  
15

16  
17 250 **PHASE 2 – Research Team GRADING of Recommendations and Incorporating Values and**  
18  
19 251 **Preferences among PLHIV and Clinicians (Figure 2)**  
20  
21

22  
23 252 We circulated the 74 preliminary recommendations to researchers, PLHIV and clinicians on the  
24  
25 253 synthesis team in order to obtain GRADE ratings for the recommendations and incorporate  
26  
27  
28 254 individual experiences, values and preferences. For each recommendation, the team member  
29  
30 255 indicated the GRADE rating incorporating both quality of the evidence and the extent to which  
31  
32 256 the recommendation was applicable to older adults living with HIV. GRADE rating at this stage  
33  
34  
35 257 included four levels [24-28]: **High** – fully endorse or strongly recommended. This  
36  
37 258 recommendation would be appropriate for the majority of older adults living with HIV,  
38  
39 259 suggested wording of the recommendation would include; 'we should or should not do';  
40  
41  
42 260 **Moderate** – moderately endorse or recommend. This recommendation would be applicable to  
43  
44  
45 261 some older adults with HIV; **Low** - minimally endorse or weak recommendation. This  
46  
47  
48 262 recommendation would be applicable to a few older adults with HIV, with potential variability  
49  
50 263 in values and preferences. Wording of this recommendation would include; 'we suggest, may  
51  
52 264 recommend or may not recommend'; or **Very low** - do not endorse or do not recommend at all.  
53  
54  
55 265 This recommendation would not be appropriate for older adults living with HIV.  
56  
57  
58  
59  
60

1  
2  
3 266 This phase of GRADE rating required a trade-off between benefits and drawbacks, and  
4  
5  
6 267 values and principles of the PLHIV, clinician or researcher. Team members were asked to  
7  
8  
9 268 comment on their values and preferences related to the recommendation and how these  
10  
11 269 influenced their rating. Team members also suggested revisions or refinement to the  
12  
13  
14 270 recommendation.

15  
16  
17 271 Collectively the evidence specific to HIV aging and rehabilitation (Stream A) was low to  
18  
19 272 very low quality as much of the evidence consisted of cross-sectional qualitative or quantitative  
20  
21  
22 273 studies (with no comparison group) or narrative reviews. No RCTs were included. Clinicians and  
23  
24 274 PLHIV on the team incorporated their clinical expertise and experience, values and preferences,  
25  
26  
27 275 respectively, when determining their final GRADE rating. For Stream B given only systematic  
28  
29 276 reviews or meta-analyses were included, the rating of the evidence was either very high or  
30  
31  
32 277 high. However, the GRADING of the recommendation depended on the extent to which the  
33  
34 278 team felt the evidence was applicable to older adults with HIV and if the intervention posed  
35  
36  
37 279 minimal risk or harm to those living with HIV and these comorbidities.  
38  
39  
40  
41  
42  
43  
44  
45  
46  
47  
48  
49  
50  
51  
52  
53  
54  
55  
56  
57  
58  
59  
60

1  
2  
3 280 **Phase 2 GRADE Results**  
4  
5

6  
7 281 The research team met twice to discuss the overall GRADE results, and recommendations for  
8  
9 282 revision (Research Team Meetings #2 and #3). In the latter meeting we summarized and  
10  
11 283 incorporated values and preferences of PLHIV and clinicians into the recommendations (Figure  
12  
13  
14 284 2).  
15  
16

17  
18 285 *Stream A - GRADE RATING RESULTS and REVISION*  
19  
20

21 286 We consolidated similar or overlapping recommendations and deleted those not highly  
22  
23 287 endorsed by the majority of the team. We also removed recommendations to specific  
24  
25 288 interventions with inconclusive evidence because of team concerns of endorsing specific  
26  
27 289 interventions over others under-reported in the research evidence.  
28  
29  
30

31  
32 290 Overall this process resulted in the deletion of eight articles. The remaining 42 articles  
33  
34 291 in Stream A yielded 16 evidence-informed recommendations for older adults with HIV that  
35  
36 292 spanned three themes: 1) implications for future education of rehabilitation professionals (1  
37  
38 293 recommendation); 2) approaches to rehabilitation assessment and treatment (14  
39  
40 294 recommendations); and 3) interventions (1 recommendation) (Figure 2).  
41  
42  
43  
44

45 295 *Stream B - GRADE RATING RESULTS and REVISION*  
46  
47

48  
49 296 Based on the GRADE rating of team members and our meeting discussions we revised the  
50  
51 297 Stream B recommendations. We deleted recommendations that were not endorsed by the  
52  
53 298 clinicians and PLHIV and recommendations that referred to conditions not common to HIV and  
54  
55 299 aging. Overall this process resulted in the removal of 6 articles. The remaining 109 articles in  
56  
57  
58  
59  
60

1  
2  
3 300 Stream B yielded 40 evidence-informed recommendations that spanned the 10 areas: bone and  
4  
5  
6 301 joint disorders, cancer (general, lung and metastatic cancer), stroke, CVD (myocardial infarction,  
7  
8  
9 302 heart disease, heart failure), mental health challenges, cognitive impairment, COPD, diabetes,  
10  
11 303 older adults and HIV/AIDS (Figure 2). Recommendations spanned interventions including  
12  
13 304 exercise, rehabilitation, self-management, cognitive rehabilitation, pulmonary rehabilitation,  
14  
15  
16 305 electrotherapeutic modalities, cardiac rehabilitation, inspiratory muscle training,  
17  
18 306 psychotherapy, models of care, and housing models.  
19

20  
21  
22 307 **PHASE 3 - EXTERNAL ENDORSEMENT- Incorporating 'expert knowledge' from clinicians and**  
23  
24 308 **adults living with HIV (Figure 3)**  
25

26  
27  
28 309 We circulated the recommendations electronically to a broader group of 38 clinicians and PLHIV  
29  
30 310 for external endorsement using an online survey. We asked participants whether they  
31  
32 311 endorsed, did not endorse, or had no opinion about each recommendation. Participants were  
33  
34 312 also invited to provide comments. We considered endorsement rates of >80%, 60-80%, and  
35  
36 313 <60% as high, moderate and low levels of endorsement, respectively. Responses from this  
37  
38 314 endorsement phase were incorporated into the final revision and refinement of the evidence-  
39  
40 315 informed recommendations (Figure 3).  
41  
42  
43  
44

45  
46 316 **External Endorsement Results:** Of the 38 PLHIV and clinicians invited to participate in the online  
47  
48 317 endorsement survey, 19 (50%) completed the online survey. Of the 19 individuals who  
49  
50 318 completed the endorsement survey, 9 (47%) were health professionals, 8 (42%) were PLHIV and  
51  
52 319 2 (11%) were both a health professional and PLHIV. Health professionals included physicians  
53  
54  
55  
56  
57  
58  
59  
60



1  
2  
3 320 (geriatrics and infectious diseases) (27%), occupational therapists (27%), speech-language  
4  
5  
6 321 pathologists (27%) and social workers (18%).  
7

8 322 Rates of endorsement for each recommendation ranged from 47% (9/19 participants) to  
9  
10 323 100% (19/19 participants). The number of participants who viewed the citations from which  
11  
12 324 the recommendations were derived ranged from three (16%) to 10 participants (53%).  
13  
14 325 Participants tended to highly endorse recommendations in Stream A and those in Stream B  
15  
16 326 related to exercise. Recommendations related to inconclusive evidence had lower rates of  
17  
18 327 endorsement. Endorsement participants highlighted how recommendations could be  
19  
20 328 applicable to any population (not just older adults with HIV). Others recommended highlighting  
21  
22 329 other interventions not captured in the recommendations, such as yoga or tai-chi. See Data  
23  
24 330 Supplement File 1 for an overview of the endorsement results.  
25  
26  
27  
28  
29

30  
31 331 Two recommendations endorsed by <60% of participants were removed. The team  
32  
33 332 further synthesized the final 52 specific recommendations into eight overarching  
34  
35 333 recommendations on rehabilitation for older adults living with HIV. See Data Supplement File  
36  
37 334 2 for the Final Evidence-Informed Recommendations and Data Supplement File 3 for  
38  
39 335 characteristics of included studies in the final recommendations.  
40  
41  
42

#### 43 336 **Final Recommendations**

44  
45  
46 337 Results of this synthesis are presented across two streams that represent the two different  
47  
48 338 bodies of research evidence totaling 52 specific recommendations (Data Supplement File 2).  
49  
50 339 We also present overarching recommendations derived from the specific detailed evidence-  
51  
52 340 informed recommendations on rehabilitation for older adults living with HIV (Table 1).  
53  
54  
55  
56  
57  
58  
59  
60

1  
2  
3 341 *Specific (Detailed) Recommendations*  
4

5  
6 342 Stream A results include 16 recommendations derived from 42 research evidence articles  
7  
8 343 specific to rehabilitation for older adults living with HIV. The level of evidence from which these  
9  
10 344 recommendations were derived was either low or very low, meaning the articles were mostly  
11  
12 345 narrative review articles or descriptive studies (either qualitative or quantitative) with small  
13  
14 346 sample sizes. Although the studies were low level evidence, the PLHIV and clinician  
15  
16 347 endorsements indicated that these were of fundamental importance in management of  
17  
18 348 disability in older adults living with HIV. Stream A recommendations serve as the contextual  
19  
20 349 backdrop to providing rehabilitation care, treatment and support to older adults living with HIV.  
21  
22 350 Some of the recommendations have additional explanatory notes to further explain the context  
23  
24 351 and PLHIV and clinician values (Data Supplement File 2). The recommendations are organized  
25  
26 352 into six categories: A) preparedness of rehabilitation professionals; B) approaches to  
27  
28 353 rehabilitation assessment and treatment of older adults living with HIV; C) extrinsic factors to  
29  
30 354 consider with rehabilitation of older adults living with HIV; D) intrinsic factors to consider with  
31  
32 355 rehabilitation of older adults living with HIV; E) rehabilitation approaches; and F) rehabilitation  
33  
34 356 interventions (Data Supplement File 2).  
35  
36  
37  
38  
39  
40  
41  
42  
43

44 357 Stream B results include 36 recommendations derived from 108 moderate or high level  
45  
46 358 research evidence articles describing the effectiveness of rehabilitation interventions for adults  
47  
48 359 living with health conditions and include specific considerations when applying rehabilitation  
49  
50 360 interventions for older PLHIV (Figure 3). Stream B recommendations include an overview of  
51  
52 361 the prevalence of the condition among older adults with HIV, main health-related challenges  
53  
54 362 for older adults with HIV experiencing this condition from a rehabilitation perspective, study  
55  
56  
57  
58  
59  
60

1  
2  
3 363 citations and level of evidence from which the recommendation was derived, age of  
4  
5  
6 364 participants included in the evidence (not all high level rehabilitation intervention evidence was  
7  
8  
9 365 specific to older adults). The recommendations include specific considerations for older adults  
10  
11 366 with HIV. The recommendations are presented based on interventions across A) older adults, B)  
12  
13 367 HIV/AIDS, and eight common comorbidities that may be experienced by older adults with HIV;  
14  
15  
16 368 C) bone and joint disorders, D) cancer, E) stroke, F) cardiovascular disease, G) mental health  
17  
18 369 challenges, H) cognitive impairments, I) COPD and J) diabetes (Data Supplement File 2).  
19  
20

### 21 370 *Overarching Recommendations*

22  
23  
24  
25 371 To facilitate knowledge transfer and exchange, we established overarching recommendations  
26  
27  
28 372 that summarized the detailed recommendations in a condensed manner (Table 1). We  
29  
30 373 consolidated the 52 specific recommendations into eight overarching recommendations on  
31  
32 374 rehabilitation for older adults living with HIV. These recommendations were endorsed at a final  
33  
34  
35 375 team meeting and provide a broader overview of the evidence synthesis.  
36  
37

### 38 376 **Table 1- Overarching Evidence-Informed Recommendations in Rehabilitation for Older Adults**

#### 39 40 41 377 **Living with HIV**

42  
43 378 The following overarching recommendations provide a general guide to providing rehabilitation care,  
44  
45  
46 379 treatment and support with older adults living with HIV.  
47  
48

49 380  
50  
51  
52  
53  
54  
55  
56  
57  
58  
59  
60

## Overarching Recommendations in Rehabilitation for Older Adults Living with HIV

1. Rehabilitation professionals should be prepared to provide care to older adults with HIV who present with **complex comorbidities** affecting neurological, cardiorespiratory and musculoskeletal systems that may result in physical, mental and social health challenges.
2. Rehabilitation professionals should adopt an **individualized and interprofessional approach to practice** that is sensitive to the **unique values, preferences and needs of older adults with HIV**. This approach should include comprehensive assessment and treatment of **physical, neurocognitive and mental health impairments, uncertainty (or worrying about the future), functional activity limitations, and social exclusion** while considering the intersections between **personal and social attributes** and the **broader determinants of health**.
3. **Multidisciplinary rehabilitation** including physical therapy, occupational therapy and speech-language pathology is strongly recommended across the **continuum of care** (acute, rehabilitation and community-based care) for older adults with HIV to address the multi-dimensional and episodic nature of disability attributed to HIV and its comorbidities such as bone and joint disorders, cancer, stroke, cardiovascular disease, mental health, cognitive impairment, chronic obstructive pulmonary disease (COPD) and diabetes.
4. Rehabilitation professionals should consider the role of **extrinsic contextual factors** such as stigma and ageism, HIV disclosure, and emotional and practical social supports on the health and well-being of older adults living with HIV.
5. Rehabilitation professionals should consider the role of **intrinsic contextual factors** such as self-management and spirituality on the health and well-being of older adults living with HIV.
6. A **combination of aerobic and resistive exercise** may be recommended for older adults living with HIV who are medically stable and living with comorbidities including bone and joint disorders, cancer, stroke, cardiovascular disease, stroke, mental health, cognitive impairment, chronic obstructive pulmonary disease (COPD), and diabetes. The frequency, intensity, time and type of exercise should be individually tailored to the specific goals and capacity of the individual and the specific co-morbidity.
7. **Cognitive rehabilitation interventions** (e.g. cognitive training, cognitive stimulation, cognitive rehabilitation) may be recommended for older adults living with HIV with mild cognitive impairment, and stroke. Inconclusive or insufficient evidence exists to support the use of **cognitive behavioural therapy** with older adults with HIV with **depression**. While cognitive rehabilitation does not appear harmful, weak evidence exists to support the use of cognitive-specific interventions to improve spatial neglect, disability, memory, and functional status for older adults who experience stroke. Rehabilitation professionals are encouraged to refer to specific clinical practice guidelines for each health condition to determine the effects of different cognitive interventions for older adults with HIV living with comorbidity.

1  
2  
3  
4  
5  
6  
7  
8  
9  
10  
11  
12  
13  
14  
15  
16  
17  
18  
19  
20  
21  
22  
23  
24  
25  
26  
27  
28  
29  
30  
31  
32  
33  
34  
35  
36  
37  
38  
39  
40  
41  
42  
43  
44  
45  
46  
47  
48  
49  
50  
51  
52  
53  
54  
55  
56  
57  
58  
59  
60

8. In the absence of high level evidence on rehabilitation interventions for older adults living with HIV and comorbidities, rehabilitation professionals should refer to **existing clinical practice guidelines, systematic reviews, meta-analyses, and other forms of high level evidence for recommendations on interventions for a specific comorbidity**. These recommendations should be applied using an individualized approach incorporating the unique values, preferences, goals and needs of the individual.

381

382 **DISCUSSION**

383 We developed evidence-informed recommendations for rehabilitation with older adults living  
384 with HIV using a complex knowledge synthesis of two distinct areas of literature while  
385 incorporating PLHIV and clinician preferences throughout. To our knowledge, these are the first  
386 evidence-informed recommendations for rehabilitation developed specifically for older adults  
387 with HIV.

388 These recommendations may be useful for rehabilitation clinicians who have not  
389 worked with PLHIV and HIV specialists unfamiliar with rehabilitation who need an  
390 understanding of evidence-informed rehabilitation so that they can make appropriate referrals  
391 for their older clients living with HIV. Stream A recommendations were derived from very low  
392 level evidence and result in general statements. Nevertheless, we feel these recommendations  
393 are useful in addressing an overall approach to working with older adults with HIV. The low  
394 level of evidence derived from this area of literature highlights the paucity of evidence specific  
395 to rehabilitation for older adults with HIV and indicates the need for increased work in this  
396 area. While our focus was with older adults with HIV, many of the Stream B recommendations  
397 were derived from evidence not specific to older adults. The wording of our recommendations  
398 depended on how well, or to what extent we could make the 'leap' from the condition-specific

1  
2  
3 399 evidence to a recommendation for rehabilitation specific to older adults living with HIV with  
4  
5  
6 400 these comorbidities. We included an overview of the prevalence of the comorbidities among  
7  
8  
9 401 older adults with HIV to assist clinicians in implementing the recommendations among adults  
10  
11 402 with HIV living with comorbidities [33]. The supportive notes that augment the  
12  
13 403 recommendations were derived primarily from PLHIV and clinician values and preferences to  
14  
15  
16 404 help to situate the recommendation into the context of older adults with HIV. Rehabilitation  
17  
18 405 professionals often tailor treatment strategies to address the consequences of disease  
19  
20  
21 406 (disability) framed with goal setting, and an individualized approach considering the unique  
22  
23 407 health and social challenges experienced by older adults with HIV. In the absence of high level  
24  
25  
26 408 evidence on rehabilitation interventions specific to older adults with HIV, clinicians may refer to  
27  
28 409 the existing guidelines for the specific comorbidity, and incorporate an individualized approach  
29  
30  
31 410 to assessment and treatment.  
32  
33

34 411 We chose to present a combination of specific and overarching recommendations to  
35  
36 412 guide rehabilitation for older adults with HIV. Those working with older adults with a specific  
37  
38 413 comorbidity may find the detailed recommendations useful to their practice. Although specific  
39  
40 414 recommendations are more likely to be followed [30], we feel the consolidated (overarching)  
41  
42 415 recommendations may be useful to health providers less familiar working in HIV care and well-  
43  
44 416 suited for knowledge translation to a broader health provider audience and community-based  
45  
46  
47 417 organizations.  
48  
49  
50

51  
52  
53 418 Overall strengths of our approach included our unique synthesis of two distinct areas of  
54  
55 419 literature combining lower level evidence on emerging issues of HIV and aging with higher level  
56  
57  
58  
59  
60

1  
2  
3 420 evidence on comorbidities commonly experienced by PLHIV to provide a strong foundation for  
4  
5  
6 421 the development of evidence-informed recommendations. We used a systematic approach to  
7  
8 422 identifying literature, determining inclusion, data extraction, and drafting and refining the  
9  
10 423 recommendations. We drafted the recommendations to include clear actionable and precise  
11  
12 424 terminology, associated with the level of evidence available. We included specific citations  
13  
14 425 from which the recommendation was derived so readers may refer to the original evidence  
15  
16 426 source of the recommendation [32]. Our interprofessional and community-integrated  
17  
18 427 approach involving 'expert' older PLHIV and clinicians brought a diverse group of stakeholders  
19  
20 428 together on numerous occasions to engage in the iterative process of recommendation  
21  
22 429 development, review and refinement and ensured the recommendations were practical and  
23  
24 430 relevant to the HIV community. External endorsement further integrated PLHIV and clinician  
25  
26 431 preferences into assessing the feasibility and refinement of recommendations for use in HIV  
27  
28 432 practice [33]. Knowledge, values and experiences of clinicians and PLHIV were integral into the  
29  
30 433 development of the recommendations, particularly when determining the relevance or unique  
31  
32 434 considerations when devising recommendations from evidence derived from other chronic  
33  
34 435 conditions.  
35  
36  
37  
38  
39  
40  
41  
42  
43

44 436 Challenges of this synthesis included combining two areas of research evidence that  
45  
46 437 differed in quality and context. We chose to retain two parallel but distinct syntheses  
47  
48 438 presented as one collective set of recommendations enabling us to synthesize emerging lower  
49  
50 439 level evidence on HIV aging and rehabilitation with higher level more established evidence in  
51  
52 440 chronic diseases experienced by older adults with HIV [34]. Much of the evidence from which  
53  
54 441 these recommendations were derived is from the United States, hence the generalizability of  
55  
56  
57  
58  
59  
60

1  
2  
3 442 these recommendations to other contexts is unknown. The lack of high level Stream A  
4  
5  
6 443 evidence specific to HIV, aging and rehabilitation resulted in high level considerations when  
7  
8 444 working with older adults with HIV, and emphasize the need for further rehabilitation  
9  
10  
11 445 intervention research specific to older adults with HIV. Disparities emerged among evidence  
12  
13 446 considered weak by GRADE definition, but essential to the values and preferences of PLHIV and  
14  
15  
16 447 clinicians. We were uncertain how to weight the research evidence with PLHIV and clinician  
17  
18 448 values and preferences in order to establish the strength of a given recommendation. We chose  
19  
20  
21 449 to remove recommendations for rehabilitation approaches with weak evidence that were not  
22  
23 450 highly endorsed by the majority of team members. Finally, these evidence-informed  
24  
25  
26 451 recommendations do not specifically address the issue of caregiving, respite and potential  
27  
28 452 caregiver burnout, important issues that should be considered by clinicians in the context of  
29  
30  
31 453 HIV and aging [31].  
32  
33

34 454 The development of these recommendations is timely given the changing demographic  
35  
36  
37 455 of adults aging with HIV. These recommendations directly address key research priorities on  
38  
39 456 comorbidities and access to rehabilitation identified in a national scoping study of the Canadian  
40  
41  
42 457 Working Group on HIV and Rehabilitation (CWGHR) [35]. Our recommendations also address  
43  
44 458 key issues related to HIV, rehabilitation and aging that emerged from a national consultation  
45  
46  
47 459 with PLHIV, researchers, educators, clinicians, and policy stakeholders by CWGHR including  
48  
49 460 comorbidities experienced by older PLHIV and social determinants of health [36]. These issues  
50  
51  
52 461 similarly emerged from the external endorsement whereby participants also indicated the  
53  
54 462 importance of end of life care [37], lifestyle modifications including adoption of exercise and  
55  
56  
57 463 yoga [38, 39], and smoking cessation among older adults with HIV [40] as critical to consider in  
58  
59  
60



1  
2  
3 464 the care and prevention strategies to enhance health for older PLHIV. We developed these  
4  
5  
6 465 recommendations in accordance with the principles outlined by CWGHR for the development of  
7  
8 466 guidelines for rehabilitation in HIV.[41] Merging the traditionally separate areas of rehabilitation, HIV  
9  
10 467 and disability, enabled us to create evidence-informed recommendations that are relevant for  
11  
12 468 rehabilitation in the context of HIV and provide clear actionable recommendations that could direct  
13  
14 469 future practice. [41]  
15  
16  
17

18 470 Limitations of this research included the qualitative nature of the synthesis whereby we  
19  
20 471 were unable to pool results from included studies into meta-analyses. Given our approach to  
21  
22 472 identify comorbidities, we may have missed other high level evidence on rehabilitation  
23  
24 473 interventions such as fall prevention or balance training that may not be specific to our pre-  
25  
26 474 determined comorbidities but may be employed with older adults living with multiple  
27  
28 475 comorbidities. Rehabilitation interventions clinicians use in practice beneficial to older adults  
29  
30 476 with HIV may not have been captured in this synthesis due to the paucity of HIV and aging  
31  
32 477 literature (Stream A) or due to their lack of high level of evidence (Stream B). Ongoing revision  
33  
34 478 of the recommendations will be required to reflect the emerging evidence and changing needs  
35  
36 479 of older adults living with HIV.  
37  
38  
39  
40  
41  
42  
43

## 44 480 **CONCLUSIONS**

45  
46 481 We established eight overarching and 52 specific evidence-informed recommendations from a  
47  
48 482 combination of low level evidence specific to HIV, aging and rehabilitation and high level  
49  
50 483 research evidence describing the effectiveness of rehabilitation interventions for adults living  
51  
52 484 with comorbidities experienced by older adults with HIV. PLHIV and clinician values and  
53  
54 485 preferences were integral in developing these recommendations. Recommendations address  
55  
56  
57  
58  
59  
60

1  
2  
3 486 approaches to rehabilitation assessment and interventions, and contextual factors to consider  
4  
5  
6 487 with rehabilitation of older adults living with HIV. These evidence-informed recommendations  
7  
8 488 provide a guide for rehabilitation with older PLHIV.  
9

10 489

### 13 490 **AUTHORS' CONTRIBUTIONS**

16 491 KO and PS led the conceptual design of the study, acquisition of funding, conducted the  
17  
18 492 synthesis, and drafted the manuscript. KO, PS, AMT, DM, and BT reviewed evidence for  
19  
20  
21 493 inclusion; KO, PS, BT, AMT, and DM extracted data from included studies; KO, AMT, PS, and BT,  
22  
23 494 conducted the initial methodological quality assessment and primary synthesis; LB, BT, DM, AC,  
24  
25  
26 495 WC, GR, JW, and TT were involved in the review and GRADING of the recommendations,  
27  
28 496 analytical interpretations, endorsement, and refinement of the recommendations. JM provided  
29  
30  
31 497 overall guidance on the synthesis methodology. EZ was the principal knowledge user and  
32  
33 498 advised on the overall development and process for future translation of the  
34  
35  
36 499 recommendations. All authors read and approved the final manuscript.  
37

38 500

### 41 501 **ACKNOWLEDGEMENTS**

43 502 We gratefully acknowledge Elizabeth Uleryk (Hospital for Sick Children) for her role in the  
44  
45  
46 503 search strategy; Ken King (Canadian Working Group on HIV and Rehabilitation) and Sheila  
47  
48  
49 504 Thomas (St. Michael's Hospital) for their role as knowledge users in earlier phases of this work;  
50  
51 505 Jenn Jimmo for her role in data extraction, Nicole Gervais for her involvement in the  
52  
53  
54 506 implementation of the endorsement survey, and Nkem Iku for her involvement in the literature  
55  
56 507 review, endorsement survey summary, and the formatting of the recommendations. We also  
57  
58  
59  
60

1  
2  
3 508 thank David Vance and Debra Henninger, authors of included evidence who graciously provided  
4  
5  
6 509 additional information for this synthesis.  
7

8  
9 510 We acknowledge the following individuals for their involvement in the endorsement  
10  
11 511 phase of the recommendations development: Colleen Price, Glyn Townson (Canadian Working  
12  
13 512 Group on HIV and Rehabilitation), Rob Alexander (HIVER Consulting), Charles Furlotte (Hamilton  
14  
15  
16 513 Health Sciences Centre, McMaster University), Dawn James (Nine Circles Community Health  
17  
18 514 Centre), Francisco Ibáñez-Carrasco (Ontario HIV Treatment Network), Gordon Arbess (St.  
19  
20  
21 515 Michael's Hospital), Bani Ahuja (Occupational Therapist), Michael Hamilton, Evan Collins  
22  
23 516 (Department of Psychiatry, University of Toronto), and Murray Jose (Toronto People With AIDS  
24  
25  
26 517 Foundation).  
27

28  
29 518

30  
31 519 **COMPETING INTERESTS**  
32

33  
34 520 The authors have no competing interests to declare.  
35  
36

37  
38 521

39  
40 522 **FUNDING**  
41

42  
43 523 This research was funded by a Canadian Institutes of Health Research (CIHR) Knowledge  
44  
45 524 Synthesis grant (Fund # 108046). At the time of this study, Kelly O'Brien was funded by a  
46  
47 525 Fellowship from the CIHR and a Michael DeGroote Postdoctoral Fellowship (McMaster  
48  
49  
50 526 University). Kelly is funded by a CIHR New Investigator Award, HIV/AIDS Research Initiative.  
51  
52

53 527

54  
55 528  
56  
57  
58  
59  
60

1  
2  
3  
4  
5  
6  
7  
8  
9  
10  
11  
12  
13  
14  
15  
16  
17  
18  
19  
20  
21  
22  
23  
24  
25  
26  
27  
28  
29  
30  
31  
32  
33  
34  
35  
36  
37  
38  
39  
40  
41  
42  
43  
44  
45  
46  
47  
48  
49  
50  
51  
52  
53  
54  
55  
56  
57  
58  
59  
60

529 **DATA SUPPLEMENT FILES (WEB ONLY)**

530 Data Supplement File 1 – External Endorsement Results

531 Data Supplement File 2 - Evidence Informed Recommendations in Rehabilitation for Older  
Adults Living with HIV

533 Data Supplement File 3 - Characteristics of Included Studies in the Evidence-Informed  
534 Recommendations in Rehabilitation for Older Adults Living with HIV

For peer review only

## 535 REFERENCES

- 1  
2  
3  
4  
5  
6  
7 536 1. Kirk JB, Goetz MB. Human immunodeficiency virus in an aging population, a  
8  
9 537 complication of success. *J Am Geriatr Soc* 2009;57:2129-2138.
- 10  
11 538 2. Oursler KK, Goulet JL, Leaf DA, et al. Association of comorbidity with physical disability in  
12  
13 539 older HIV-infected adults. *AIDS Patient Care STDS* 2006;20:782-791.
- 14  
15  
16 540 3. Weiss JJ, Osorio G, Ryan E, et al. Prevalence and patient awareness of medical  
17  
18 541 comorbidities in an urban AIDS clinic. *AIDS Patient Care STDS* 2010;24:39-48.
- 19  
20 542 4. Willard S, Holzemer WL, Wantland DJ, et al. Does "asymptomatic" mean without  
21  
22 543 symptoms for those living with HIV infection? *AIDS Care* 2009;21:322-328.
- 23  
24  
25 544 5. O'Brien KK, Bayoumi AM, Strike C, et al. Exploring disability from the perspective of  
26  
27 545 adults living with HIV/AIDS: development of a conceptual framework. *Health Qual Life*  
28  
29 546 *Outcomes* 2008;6:76.
- 30  
31  
32 547 6. Rusch M, Nixon S, Schilder A, et al. Impairments, activity limitations and participation  
33  
34 548 restrictions: prevalence and associations among persons living with HIV/AIDS in British  
35  
36 549 Columbia. *Health Qual Life Outcomes* 2004;2:46.
- 37  
38  
39 550 7. Rusch M, Nixon S, Schilder A, et al. Prevalence of activity limitation among persons living  
40  
41 551 with HIV/AIDS in British Columbia. *Can J Public Health* 2004;95:437-440.
- 42  
43  
44 552 8. Vance DE, Mugavero M, Willig J, et al. Aging With HIV: A Cross-Sectional Study of  
45  
46 553 Comorbidity Prevalence and Clinical Characteristics Across Decades of Life. *J Assoc*  
47  
48 554 *Nurses AIDS Care* 2011;22:17-25.
- 49  
50  
51 555 9. Brown TT, McComsey GA. Osteopenia and osteoporosis in patients with HIV: a review of  
52  
53 556 current concepts. *Curr Infect Dis Rep* 2006;8:162-170.
- 54  
55  
56  
57  
58  
59  
60

- 1  
2  
3 557 10. Heaton RK, Clifford DB, Franklin DR, Jr., et al. HIV-associated neurocognitive disorders  
4  
5  
6 558 persist in the era of potent antiretroviral therapy: CHARTER Study. *Neurology*  
7  
8 559 2011;75:2087-2096.
- 10 560 11. Shiels MS, Cole SR, Kirk GD, et al. A meta-analysis of the incidence of non-AIDS cancers  
11  
12 561 in HIV-infected individuals. *J Acquir Immune Defic Syndr* 2009;52:611-622.
- 15 562 12. Heckman TG, Heckman BD, Kochman A, et al. Psychological symptoms among persons  
16  
17 563 50 years of age and older living with HIV disease. *Aging & Mental Health* 2002;6:121-  
18  
19 564 128.
- 22 565 13. Grov C, Golub SA, Parsons JT, et al. Loneliness and HIV-related stigma explain depression  
23  
24 566 among older HIV-positive adults. *AIDS Care* 2010;22:630-639.
- 27 567 14. Vance DE, Woodley RA. Strengths and distress in adults who are aging with HIV: a pilot  
28  
29 568 study. *Psychol Rep* 2005;96:383-386.
- 32 569 15. Oursler KK, Sorkin JD, Smith BA, et al. Reduced aerobic capacity and physical functioning  
33  
34 570 in older HIV-infected men. *AIDS Res Hum Retroviruses* 2006;22:1113-1121.
- 37 571 16. Oursler KK, Goulet JL, Crystal S, et al. Association of age and comorbidity with physical  
38  
39 572 function in HIV-infected and uninfected patients: results from the Veterans Aging Cohort  
40  
41 573 Study. *AIDS Patient Care STDS* 2011;25:13-20.
- 44 574 17. Worthington C, Myers T, O'Brien K, et al. Rehabilitation in HIV/AIDS: development of an  
45  
46 575 expanded conceptual framework. *AIDS Patient Care STDS* 2005;19:258-271.
- 49 576 18. Jolliffe JA, Rees K, Taylor RS, et al. Exercise-based rehabilitation for coronary heart  
50  
51 577 disease. *Cochrane Database Syst Rev* 2001;CD001800.
- 52  
53  
54  
55  
56  
57  
58  
59  
60

- 1  
2  
3 578 19. Saunders DH, Greig CA, Mead GE, et al. Physical fitness training for stroke patients.  
4  
5  
6 579 *Cochrane Database Syst Rev* 2009;CD003316.  
7  
8  
9 580 20. Cramp F, Daniel J. Exercise for the management of cancer-related fatigue in adults.  
10  
11 581 *Cochrane Database Syst Rev* 2008;CD006145.  
12  
13 582 21. Worthington C, Myers T, O'Brien K, et al. Rehabilitation professionals and human  
14  
15 immunodeficiency virus care: results of a national Canadian survey. *Arch Phys Med*  
16 583  
17 *Rehabil* 2008;89:105-113.  
18 584  
19  
20  
21 585 22. van der Weijden T, Legare F, Boivin A, et al. How to integrate individual patient values  
22  
23 586 and preferences in clinical practice guidelines? A research protocol. *Implement Sci*  
24  
25 587 2010;5:10.  
26  
27  
28 588 23. Higgins J, Green S. *Cochrane Handbook for Systematic Reviews of Interventions* The  
29  
30 Cochrane Collaboration. Version 5.0.2 [updated September 2009]. 2009.  
31 589  
32  
33 590 24. Atkins D, Best D, Briss PA, et al. Grading quality of evidence and strength of  
34  
35 591 recommendations. *Bmj* 2004;328:1490.  
36  
37  
38 592 25. Guyatt G, Gutterman D, Baumann MH, et al. Grading strength of recommendations and  
39  
40 593 quality of evidence in clinical guidelines: report from an american college of chest  
41  
42 594 physicians task force. *Chest* 2006;129:174-181.  
43  
44  
45 595 26. Brozek JL, Akl EA, Alonso-Coello P, et al. Grading quality of evidence and strength of  
46  
47 596 recommendations in clinical practice guidelines. Part 1 of 3. An overview of the GRADE  
48  
49 597 approach and grading quality of evidence about interventions. *Allergy* 2009;64:669-677.  
50  
51  
52 598 27. Brozek JL, Akl EA, Jaeschke R, et al. Grading quality of evidence and strength of  
53  
54 599 recommendations in clinical practice guidelines: Part 2 of 3. The GRADE approach to  
55  
56  
57  
58  
59  
60

- 1  
2  
3 600 grading quality of evidence about diagnostic tests and strategies. *Allergy* 2009;64:1109-  
4  
5  
6 601 1116.  
7  
8  
9 602 28. Brozek JL, Akl EA, Compalati E, et al. Grading quality of evidence and strength of  
10  
11 603 recommendations in clinical practice guidelines part 3 of 3. The GRADE approach to  
12  
13 604 developing recommendations. *Allergy* 2011;66:588-595.  
14  
15  
16 605 29. Hsieh HF, Shannon SE. Three approaches to qualitative content analysis. *Qual Health Res*  
17  
18 606 2005;15:1277-1288.  
19  
20  
21 607 30. Grol R, Dalhuijsen J, Thomas S, et al. Attributes of clinical guidelines that influence use of  
22  
23 608 guidelines in general practice: observational study. *Bmj* 1998;317:858-861.  
24  
25  
26 609 31. Emlert CA, Poindexter CC. Unserved, unseen, and unheard: integrating programs for HIV-  
27  
28 610 infected and HIV-affected older adults. *Health Soc Work* 2004;29:86-96.  
29  
30  
31 611 32. Woolf S, Schunemann HJ, Eccles MP, et al. Developing clinical practice guidelines: types  
32  
33 612 of evidence and outcomes; values and economics, synthesis, grading, and presentation  
34  
35 613 and deriving recommendations. *Implement Sci* 2012;7:61.  
36  
37  
38 614 33. Shekelle P, Woolf S, Grimshaw JM, et al. Developing clinical practice guidelines:  
39  
40 615 reviewing, reporting, and publishing guidelines; updating guidelines; and the emerging  
41  
42 616 issues of enhancing guideline implementability and accounting for comorbid conditions  
43  
44 617 in guideline development. *Implement Sci* 2012;7:62.  
45  
46  
47  
48 618 34. Turner-Stokes L: Evidence for the effectiveness of multi-disciplinary rehabilitation  
49  
50 619 following acquired brain injury: a synthesis of two systematic approaches. *J Rehabil Med*  
51  
52 620 2008;40:691-701.  
53  
54  
55  
56  
57  
58  
59  
60



- 1  
2  
3 621 35. O'Brien K, Wilkins A, Zack E, Solomon P. Scoping the Field: Identifying Key Research  
4  
5  
6 622 Priorities in HIV and Rehabilitation. *AIDS Behav* 2010;14:448-458.  
7  
8  
9 623 36. Canadian Working Group on HIV and Rehabilitation: Partners in Aging: *Report on a*  
10  
11 624 *national project on HIV and Aging*. 2010.  
12  
13  
14 625 37. Harding R, Karus D, Easterbrook P, et al. Does palliative care improve outcomes for  
15  
16 626 patients with HIV/AIDS? A systematic review of the evidence. *Sex Transm Infect*  
17  
18 627 2005;81:5-14.  
19  
20  
21 628 38. Yahiaoui A, McGough EL, Voss JG. Development of Evidence-Based Exercise  
22  
23 629 Recommendations for Older HIV-Infected Patients. *JANAC* 2012;23:204–219.  
24  
25  
26 630 39. Cade WT, Reeds DN, Mondy KE, et al. Yoga lifestyle intervention reduces blood pressure  
27  
28 631 in HIV-infected adults with cardiovascular disease risk factors. *HIV Med* 2010;11:379-  
29  
30 632 388.  
31  
32  
33 633 40. Nahvi S, Cooperman NA. Review: the need for smoking cessation among HIV-positive  
34  
35 634 smokers. *AIDS Educ Prev* 2009;21:14-27.  
36  
37  
38 635 41. O'Brien KK, Wilkins A, Zack E, et al. Developing clinical practice guidelines in HIV  
39  
40 636 rehabilitation: process recommendations and guiding principles. *AIDS Education and*  
41  
42 637 *Prevention* 2011;23(5):457-468.  
43  
44  
45 638 42. Worthington C, O'Brien K, Myers T, et al. Expanding the lens of HIV services provision in  
46  
47 639 Canada: results of a national survey of HIV health professionals. *AIDS Care*  
48  
49 640 2009;21:1371-1380.  
50  
51  
52 641 43. Canadian Working Group on HIV and Rehabilitation, Wellesley Insitute: *Equitable Access*  
53  
54 642 *to Rehabilitation: Realizing Potential, Promising Practices, and Policy Directions*.  
55  
56  
57  
58  
59  
60

1  
2  
3  
4  
5  
6  
7  
8  
9  
10  
11  
12  
13  
14  
15  
16  
17  
18  
19  
20  
21  
22  
23  
24  
25  
26  
27  
28  
29  
30  
31  
32  
33  
34  
35  
36  
37  
38  
39  
40  
41  
42  
43  
44  
45  
46  
47  
48  
49  
50  
51  
52  
53  
54  
55  
56  
57  
58  
59  
60

643 <http://www.hivandrehab.ca/EN/resources/documents/EquitableAccessToRehabilitation>

644 [DiscussionPaper-Final.pdf](#). 2012.

645

For peer review only

**Figure 1: Overview of Knowledge Synthesis Procedure – Classification, Assessing Methodological Quality, Synthesis and Drafting Preliminary Recommendations (Phase 1)**

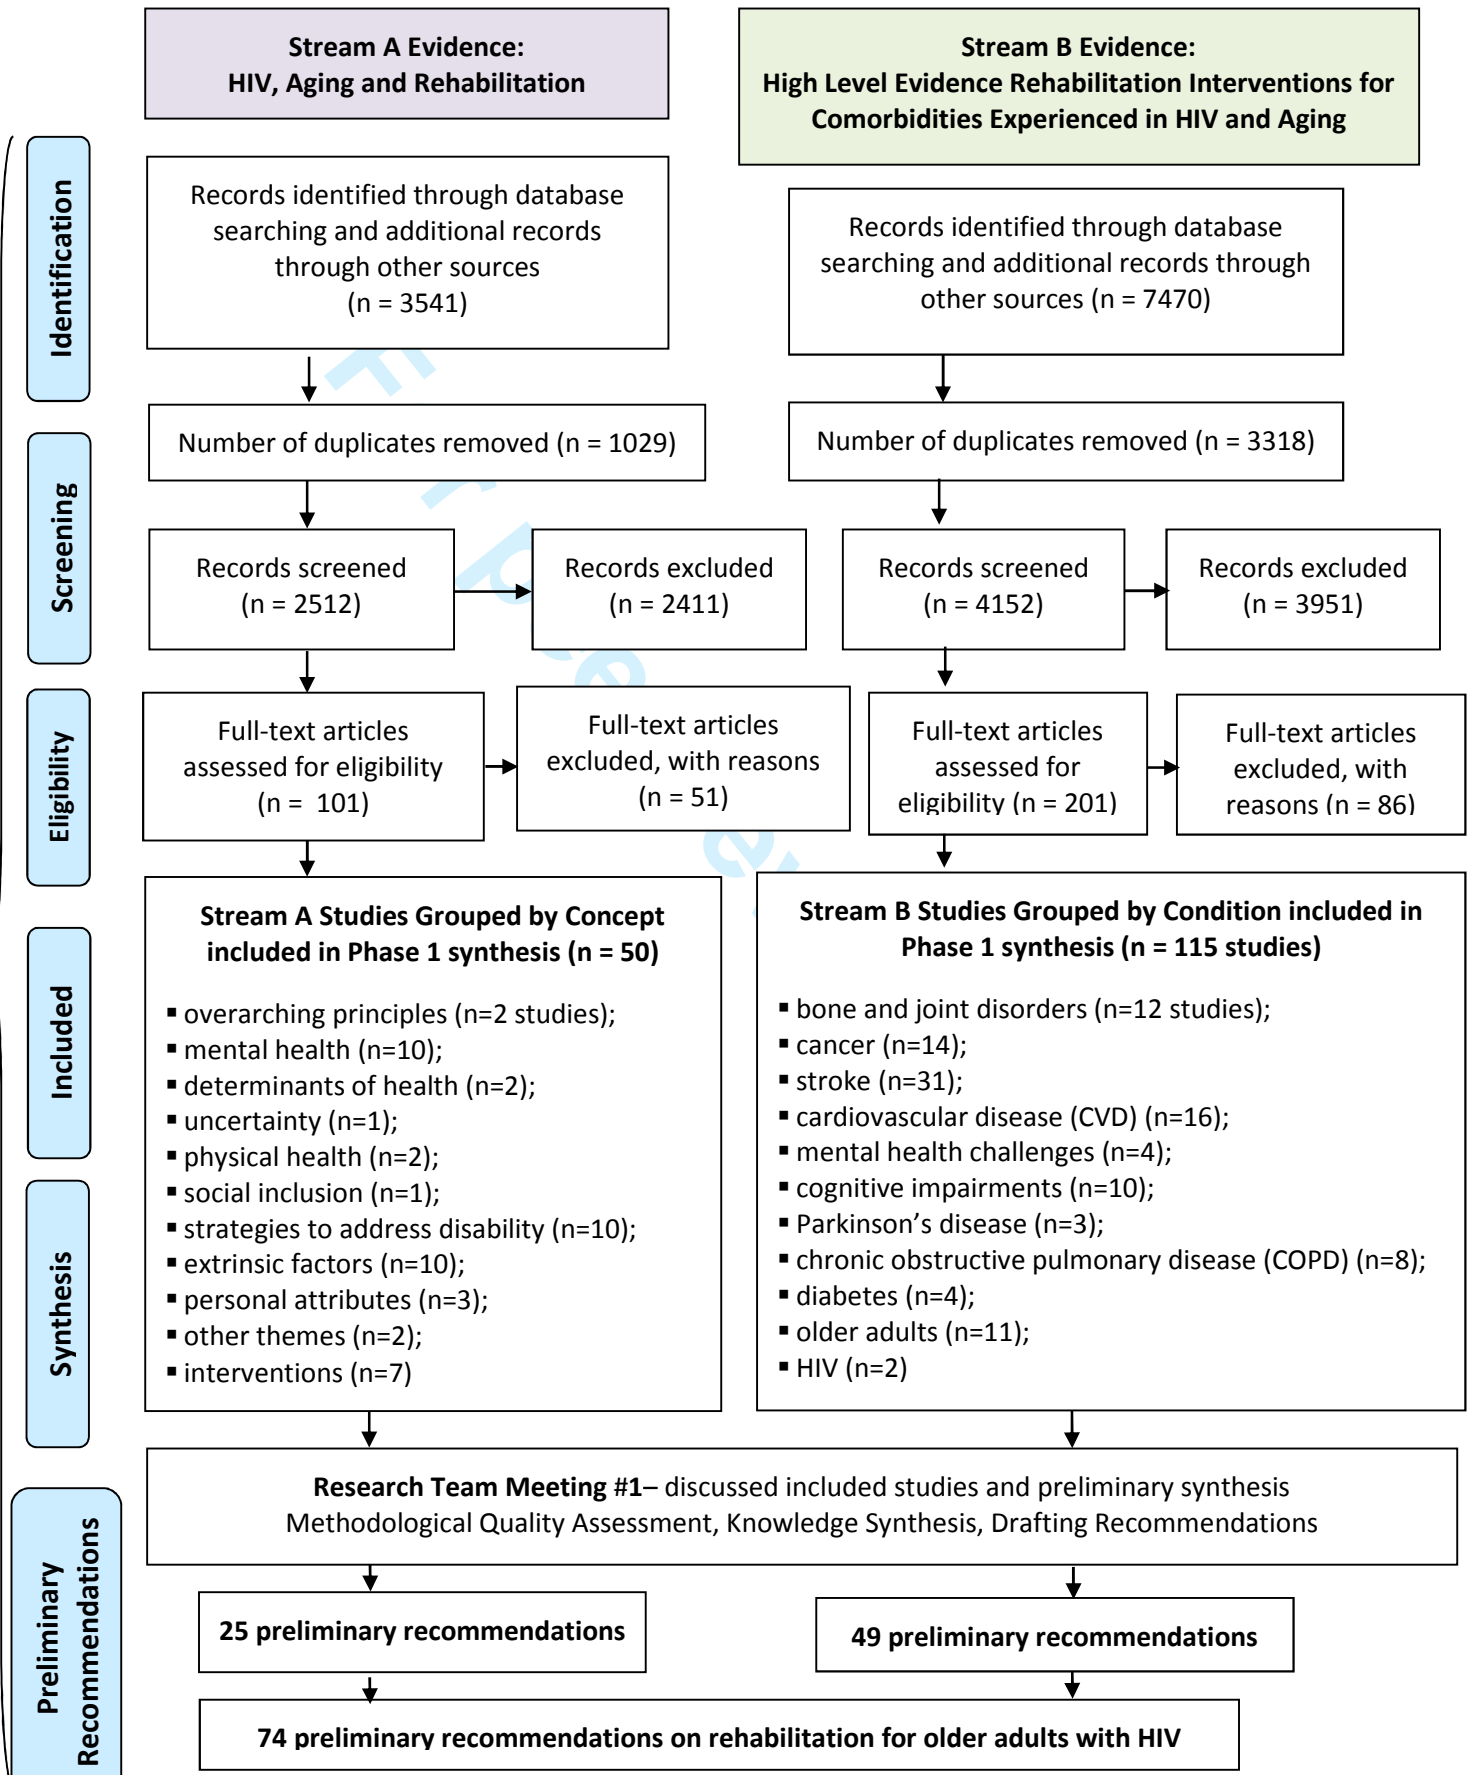

**Figure 2: Overview of Knowledge Synthesis Procedure – Research Team GRADING of Recommendations and Incorporating Values and Preferences (Phase 2)**

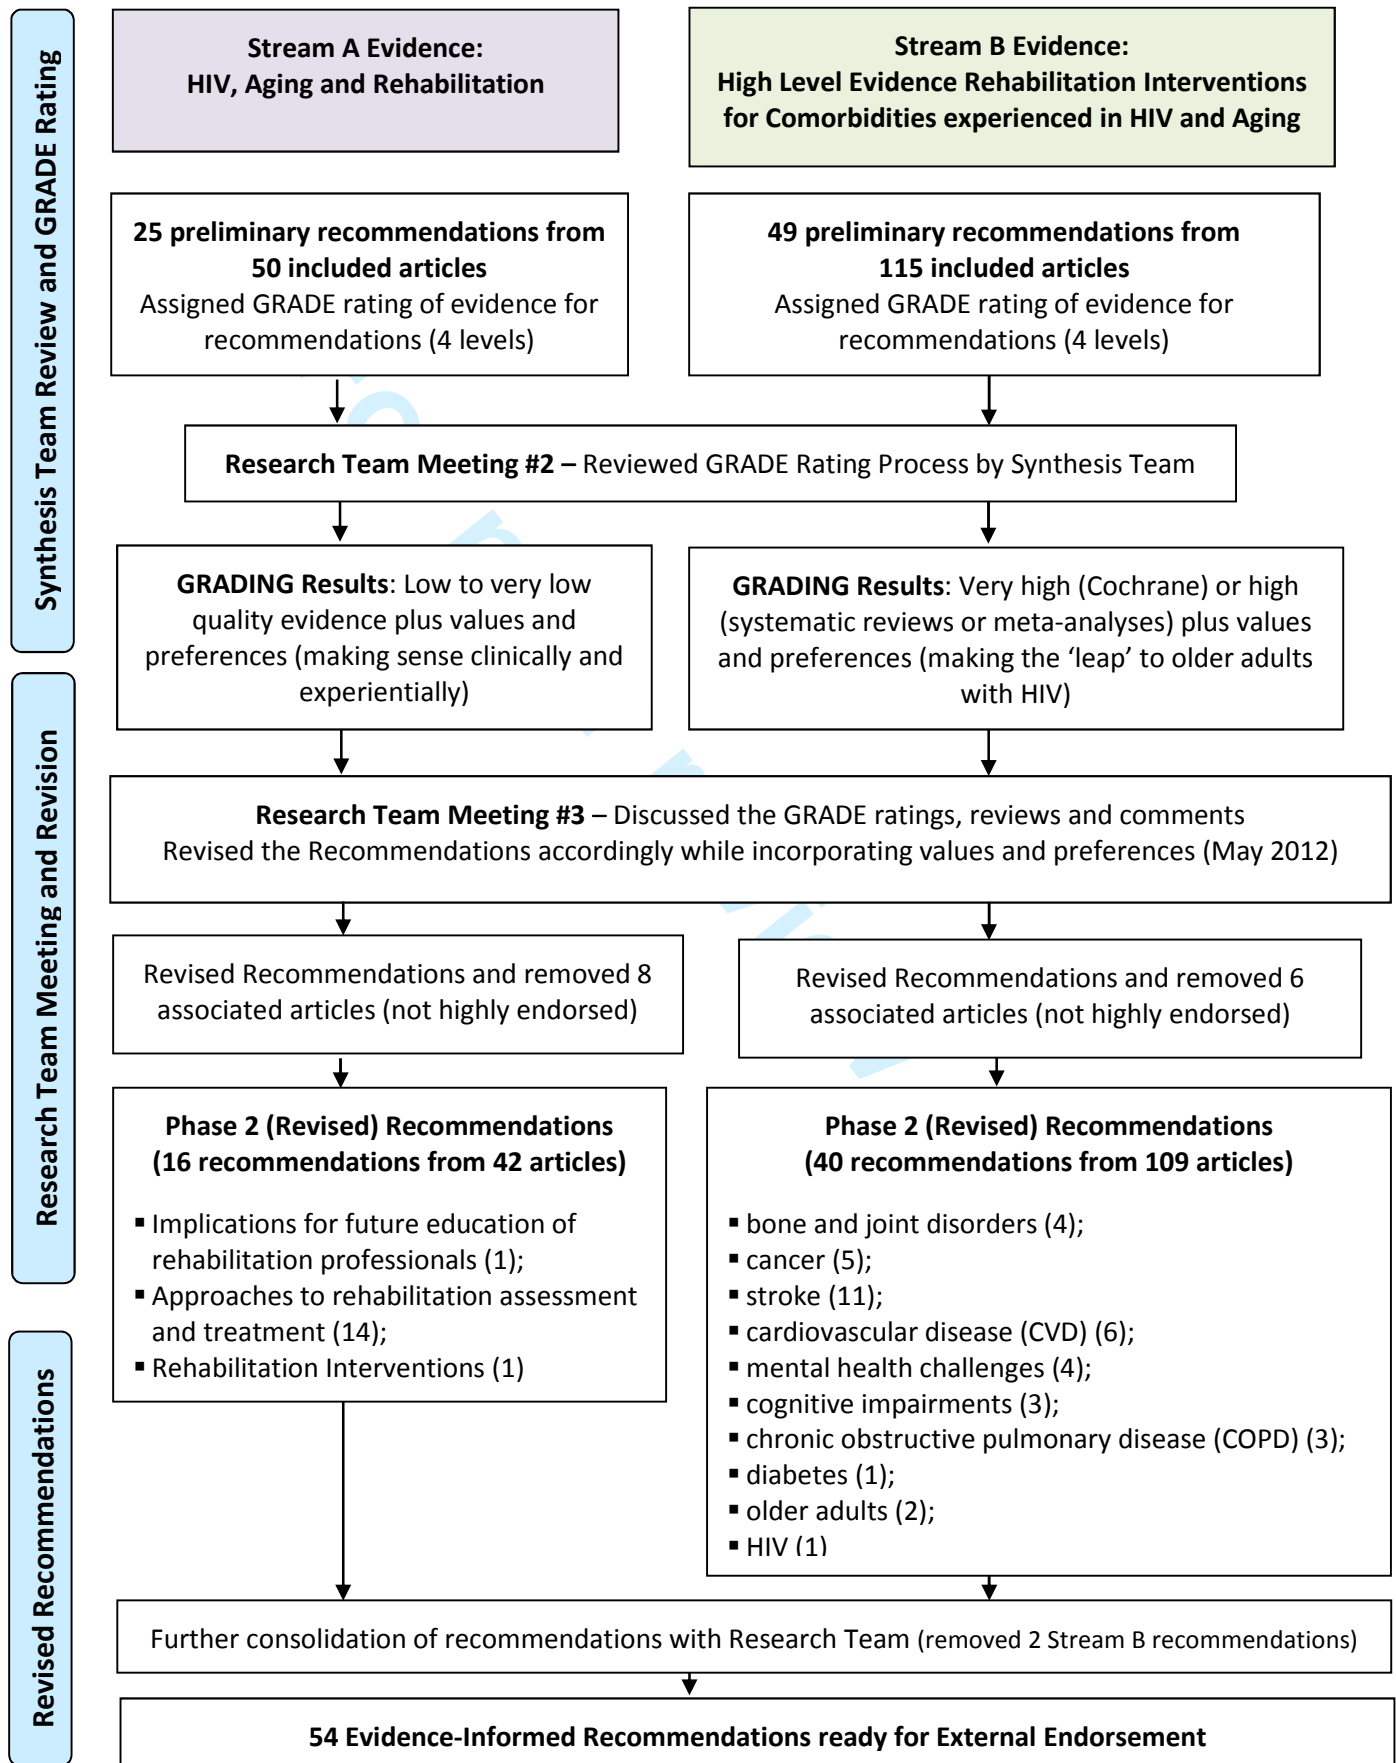

Figure 3: Overview of Knowledge Synthesis Procedure – External Endorsement (Phase 3)

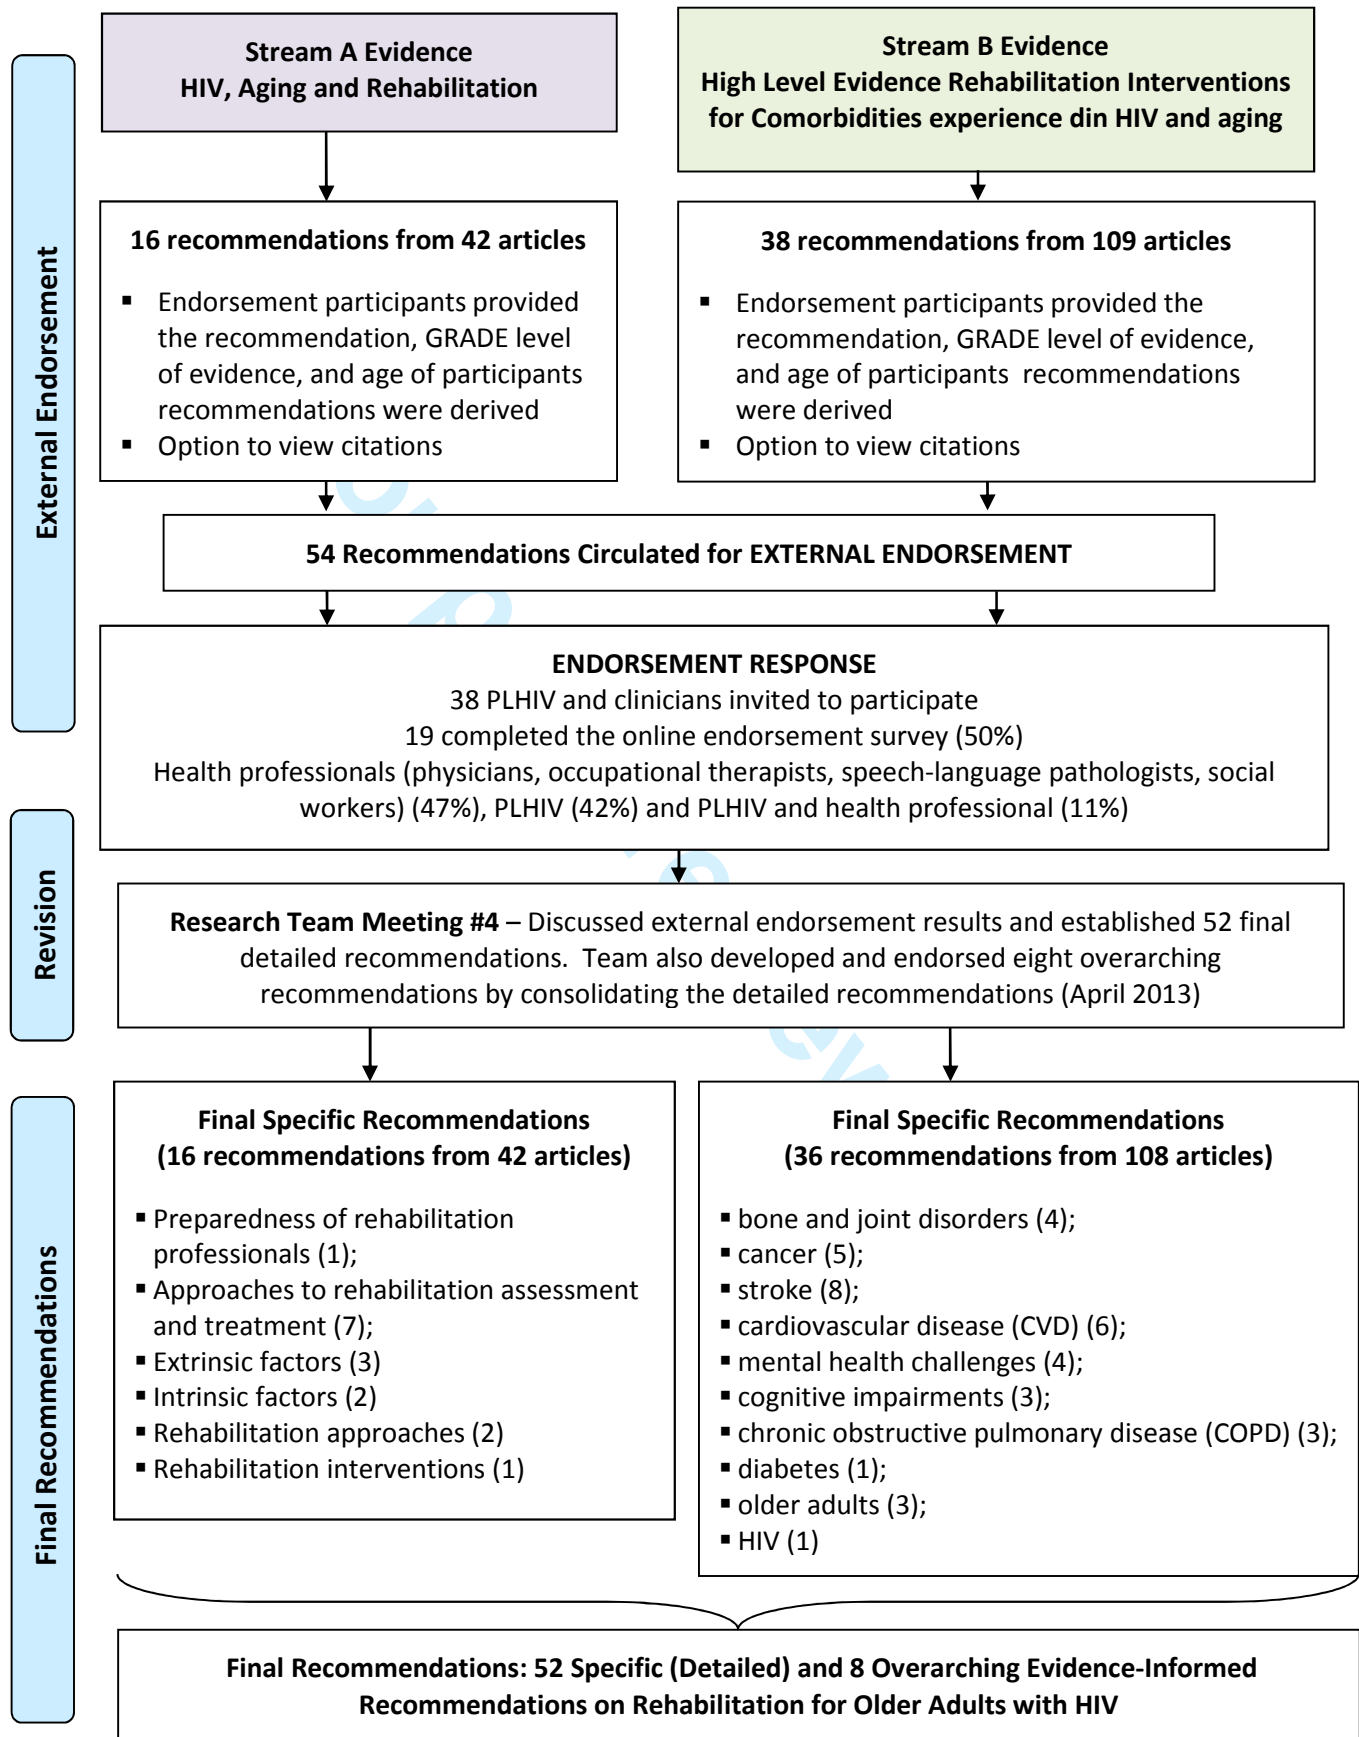

### Data Supplement File 1 –External Endorsement Results- Evidence Informed Recommendations in Rehabilitation for Older Adults Living with HIV

Of the 38 PHAs and clinicians invited to participate, 19 (50%) completed the endorsement survey. Of the 19 individuals, 9 (47.4%) were health professionals, 8 (42.1%) were people living with HIV and 2 (10.5%) were both a health professional and a person living with HIV. Health professional type included physicians (geriatrics and infectious diseases) (15.8%), occupational therapists (15.8%), speech-language pathologist (or therapist) (10.5%) and social workers (15.8%). We considered endorsement rates of >80%, 60-80% and <60% as high, moderate and low, respectively.

~Table reflects the draft recommendations sent for endorsement, hence the numbering and recommendations differ from the final recommendations presented in the Additional File 2 (Final Recommendations).

\* indicates 1 missing response in level of endorsement

| Number~ | Draft Recommendation                                                                                                                                                                                                                                                           | Number of PLHIV and Clinicians who Endorsed the Recommendation (%) | # (%) who looked at Evidence Citations | Selected Comments from Endorsement Participants                                                                                                                                                                                                                                                                                                                                                                                                                                                                                                                                                                                                                                                                                                                                                                                                                                                                                                                                                                                             |
|---------|--------------------------------------------------------------------------------------------------------------------------------------------------------------------------------------------------------------------------------------------------------------------------------|--------------------------------------------------------------------|----------------------------------------|---------------------------------------------------------------------------------------------------------------------------------------------------------------------------------------------------------------------------------------------------------------------------------------------------------------------------------------------------------------------------------------------------------------------------------------------------------------------------------------------------------------------------------------------------------------------------------------------------------------------------------------------------------------------------------------------------------------------------------------------------------------------------------------------------------------------------------------------------------------------------------------------------------------------------------------------------------------------------------------------------------------------------------------------|
| 1       | Rehabilitation professionals should be prepared to provide care to older adults with HIV who present with <b>complex comorbidities</b> affecting neurological, cardiorespiratory and musculoskeletal systems that may result in physical, mental and social health challenges. | 19 (100)                                                           | 8 (42.1)                               | <p>Although many chronic illnesses lead to complex co-morbidities, HIV/AIDs brings with it stigma, secrecy and sometimes shame. Rehab professionals need to be prepared to adjust to this. Therefore rehab professionals need to be prepared to deal with HIV in particular.</p> <p>As a large part of the population living with HIV/AIDS ages, they encounter multiple complexities in daily life. The first step to preparing rehabilitation professions for this step would be a significantly greater understanding of the condition itself, and it's impact on daily life. Rehab professionals have a large focus on aging issues as a part of their scope of practice anyway. Hence, understanding the complex comorbidities that accompany aging with HIV is not too much of an additional burden, but can go a mile when needed.</p> <p>A good understanding of some of the mental health aspects of long term HIV care would be a great help.</p> <p>It makes sense but have not seen many older patients get rehabilitation.</p> |

| Number~ | Draft Recommendation                                                                                                                                                                                                                                                                                                                                                                                                                                                                                                                                                                   | Number of PLHIV and Clinicians who Endorsed the Recommendation (%) | # (%) who looked at Evidence Citations | Selected Comments from Endorsement Participants                                                                                                                                                                                                                                                                                                                                                                                                                                                                                                                                                                                                                                                                                                                                                                                                                                                                                                                                                                                                  |
|---------|----------------------------------------------------------------------------------------------------------------------------------------------------------------------------------------------------------------------------------------------------------------------------------------------------------------------------------------------------------------------------------------------------------------------------------------------------------------------------------------------------------------------------------------------------------------------------------------|--------------------------------------------------------------------|----------------------------------------|--------------------------------------------------------------------------------------------------------------------------------------------------------------------------------------------------------------------------------------------------------------------------------------------------------------------------------------------------------------------------------------------------------------------------------------------------------------------------------------------------------------------------------------------------------------------------------------------------------------------------------------------------------------------------------------------------------------------------------------------------------------------------------------------------------------------------------------------------------------------------------------------------------------------------------------------------------------------------------------------------------------------------------------------------|
| 2       | <p>Rehabilitation professionals <u>should</u> adopt an individualized approach to assessment and treatment of older adults living with HIV to fully understand the <b>unique and complex needs of older adults with HIV</b>. This approach should consider the intersections between personal and social attributes (race, gender, sexual orientation, ethnocultural background and socioeconomic status) and the <b>broader determinants of health</b> (housing, access to health care, poverty, racism, financial supports, income support, education, work and parenting roles)</p> | 19 (100)                                                           | 7 (36.8)                               | <p>It's discouraging to see that evidence is low for many of these recommendations as we have now lived with HIV/AIDs for 30 years.</p> <p>Management of HIV/AIDS largely depends on personal factors such as resources and social support systems, as has been evident in my practice. Thus it is very important to apply an individualized approach to assessment and treatment, in order to provide the best client-centered care.</p> <p>Just as living with any other chronic illness, living with HIV/AIDS plays out very differently in individuals. In my practice, I have seen social support, socioeconomic status as well work status largely differ and impact clients differently. Hence it is very important to adapt an individualized approach.</p> <p>I personally think a unique approach is best in every rehab case.</p> <p>I endorse it however I feel that the above recommendation could and should be said about any individual patient or patient population.</p> <p>This is generally true for all rehab patients.</p> |
| 3       | <p>Rehabilitation professionals <u>should</u> consider assessing <b>diversity of physical and mental health outcomes during assessment</b>, which include but are not limited to outcomes of disability, quality of life, stress, coping, anxiety and depression, retirement and financial issues, sexual and familial relationships, loneliness and social networks, cognition, and daily function.</p>                                                                                                                                                                               | 19 (100)                                                           | 8 (42.1)                               | <p>Rehab professionals may need to be ready to refer an HIV+ client with any of the above concerns as he or she may not be addressing them as well as they could be addressed.</p> <p>There should be services ready to help back up the findings of the assessment. For example, if a new client is assessed as depressed what is the plan for next steps?</p> <p>Mental health issues as responses to societal oppression</p>                                                                                                                                                                                                                                                                                                                                                                                                                                                                                                                                                                                                                  |

| Number~ | Draft Recommendation                                                                                                                                                                                                                                                                              | Number of PLHIV and Clinicians who Endorsed the Recommendation (%) | # (%) who looked at Evidence Citations | Selected Comments from Endorsement Participants                                                                                                                                                                                                                                                                                                                                                                                                                                                                                                                                                                                                                                                                                                          |
|---------|---------------------------------------------------------------------------------------------------------------------------------------------------------------------------------------------------------------------------------------------------------------------------------------------------|--------------------------------------------------------------------|----------------------------------------|----------------------------------------------------------------------------------------------------------------------------------------------------------------------------------------------------------------------------------------------------------------------------------------------------------------------------------------------------------------------------------------------------------------------------------------------------------------------------------------------------------------------------------------------------------------------------------------------------------------------------------------------------------------------------------------------------------------------------------------------------------|
|         |                                                                                                                                                                                                                                                                                                   |                                                                    |                                        | I endorse it however I feel that the above recommendation could and should be said about any individual patient or patient population.                                                                                                                                                                                                                                                                                                                                                                                                                                                                                                                                                                                                                   |
| 4       | Rehabilitation professionals <b>should</b> assess both <b>physical impairment and functional activity</b> with older adults living with HIV given physical symptoms or impairments (such as limitations in aerobic capacity) may not always translate into challenges with functional activities. | 16 (84.2)                                                          | 9 (47.4)                               | <p>Having a focus on functional activities is especially important in regards to assessing independence and impact of HIV on aging.</p> <p>Being an occupational therapist, functional impact of any impairment is the chief focus of my practice. Just as other symptoms, any impairment can have different functional impacts within individuals depending on lifestyle and priorities.</p> <p>ADLs and IADLs are important aspects of a psychosocial assessment.</p> <p>I would think functional abilities and limitations would be of more interest/relevance to OTs vs. assessing aerobic capacity.</p> <p>We do this for all elderly rehab patients why would it be different for HIV.</p> <p>Interventions need to be holistic in all regards</p> |
| 5       | Rehabilitation professionals <u>should</u> incorporate mental health assessment and treatment into the care of older adults with HIV as they are at risk of experiencing low mood, anxiety, depression, and suicide ideation.                                                                     | 19 (100)                                                           | 7 (36.8)                               | <p>Substance use, concurrent disorders are tied into HIV population in general and I think should be mentioned here. Aging, HIV, chronic illness, mental illness can increase an older person's risk for substance use even have they have never had problems before. I think Assessment of concurrent disorders is important when looking at Mental Health.</p> <p>Extremely important based on my friends' experiences living with HIV/AIDS.</p> <p>Assessment and treatment in this area should be beyond</p>                                                                                                                                                                                                                                         |



| Number~ | Draft Recommendation                                                                                                                                                                                                                                                                                                                                                                                                                    | Number of PLHIV and Clinicians who Endorsed the Recommendation (%) | # (%) who looked at Evidence Citations | Selected Comments from Endorsement Participants                                                                                                                                                                                                                                                                                                                                                                                                                                                                                                                                                                                                                                                                                                                                                                                                                                                                                                                                                                                                                                                                                                                                                                                                                                                                                                                                                                                                                                                                                                                  |
|---------|-----------------------------------------------------------------------------------------------------------------------------------------------------------------------------------------------------------------------------------------------------------------------------------------------------------------------------------------------------------------------------------------------------------------------------------------|--------------------------------------------------------------------|----------------------------------------|------------------------------------------------------------------------------------------------------------------------------------------------------------------------------------------------------------------------------------------------------------------------------------------------------------------------------------------------------------------------------------------------------------------------------------------------------------------------------------------------------------------------------------------------------------------------------------------------------------------------------------------------------------------------------------------------------------------------------------------------------------------------------------------------------------------------------------------------------------------------------------------------------------------------------------------------------------------------------------------------------------------------------------------------------------------------------------------------------------------------------------------------------------------------------------------------------------------------------------------------------------------------------------------------------------------------------------------------------------------------------------------------------------------------------------------------------------------------------------------------------------------------------------------------------------------|
| 6       | Rehabilitation professionals <u>should</u> conduct regular <b>neurocognitive screening</b> with older adults living with HIV, and where indicated, conduct complete assessments to identify early signs of HIV-associated executive functioning deficits (e.g. ability to keep appointments, adhere to medication regimens, and follow-up on recommendations) and interventions to effectively reduce or prevent cognitive impairments. | 16 (84.2)                                                          | 10 (52.6)                              | <p>the common understanding that PHAs experience episodes of depression; including social interactions, active daily living activities and other health related issues that may impact more broadly as people age - with or without a health issue.</p> <p>Since HIV/AIDS appears as more of a chronic condition in today's world, rather than a life threatening one, a lot of the symptoms have to be dealt with over a long period of time including access/intake of medications, management of side effects and maintaining relationships. All of which, much like other chronic conditions such as chronic pain, cancer, etc. can have an impact on the mental health of the person involved. Thus a focus on mental health assessment and treatment should be included.</p> <p>It is important to listen to every rehab client and to learn from them what their experience has been.</p> <p>Co-infected HIV/HCV may be at elevated risk for neurocognitive impairment.</p> <p>I agree but would recommend adding words "compensate" or "support" in addition to "prevent"/"reduce" as this may be the more realistic goal.</p> <p>I thought that there was significant evidence for early onset of cognitive impairments for many PHAs.</p> <p>Neurocognitive screening should be incorporated as standard practice in the treatment of HIV at all levels, and is currently often not addressed. This particularly needs to be incorporated in dealing with PHAs and aging.</p> <p>I had 1 patient with HIV CNS changes and this was very important.</p> |

| Number~ | Draft Recommendation                                                                                                                                                                                                                                                                         | Number of PLHIV and Clinicians who Endorsed the Recommendation (%) | # (%) who looked at Evidence Citations | Selected Comments from Endorsement Participants                                                                                                                                                                                                                                                                                                                                                                                                                                                                                                                                                                                                                                                                                                                                                                                                                                                             |
|---------|----------------------------------------------------------------------------------------------------------------------------------------------------------------------------------------------------------------------------------------------------------------------------------------------|--------------------------------------------------------------------|----------------------------------------|-------------------------------------------------------------------------------------------------------------------------------------------------------------------------------------------------------------------------------------------------------------------------------------------------------------------------------------------------------------------------------------------------------------------------------------------------------------------------------------------------------------------------------------------------------------------------------------------------------------------------------------------------------------------------------------------------------------------------------------------------------------------------------------------------------------------------------------------------------------------------------------------------------------|
|         |                                                                                                                                                                                                                                                                                              |                                                                    |                                        | <p>In my practice, I realized that neurocognitive issues were a significant part of my assessment and intervention strategies, as they impact many adults living with HIV. When you combine in the aging factor, this area becomes even more important to focus on.</p>                                                                                                                                                                                                                                                                                                                                                                                                                                                                                                                                                                                                                                     |
| 7       | <p>Rehabilitation professionals <u>should</u> be aware of the potential impact of <b>uncertainty</b> among older adults with HIV and the psychological importance for some older adults to know the source of their symptoms (age-related versus HIV-related versus medication-related).</p> | 17 (89.5)                                                          | 8 (42.1)                               | <p>Life can be a roller coaster of unforeseen illnesses and impairments for PHAs.</p> <p>I would endorse this as one of strongest areas that needs to be looked at and addressed and very much like that it addresses age-related versus HIV or medication related as far too often this area is determined to be illness or treatment related.</p> <p>Uncertainty is a factor for maybe older clients.</p> <p>Yes! Symptom ambiguity is a key area of understanding lived experiences of this population.</p> <p>True - just as rehab professionals should be aware of uncertainty of all chronic illnesses.</p> <p>Without Blood level monitoring for HIV drugs how would this be informed information?</p> <p>While this generally may be relevant for other aging and health challenges, it is very unique and important in the context of HIV and needs to be properly acknowledged and addressed.</p> |
| 8       | <p>Rehabilitation professionals <u>should</u> consider the risk of <b>social exclusion</b> older adults with HIV may face in relation to race, ethnicity, gender, and sexual orientation in their assessment.</p>                                                                            | 18 (94.7)                                                          | 7 (36.8)                               | <p>Isolation seems to be common among those I know who are HIV+ or who have AIDS.</p> <p>It seems this statement neglects to consider the very real possibility of social exclusion based simply on HIV status.</p> <p>Perhaps HIV and age-related stigma should be included in</p>                                                                                                                                                                                                                                                                                                                                                                                                                                                                                                                                                                                                                         |

| Number~ | Draft Recommendation                                                                                                                                                                                | Number of PLHIV and Clinicians who Endorsed the Recommendation (%) | # (%) who looked at Evidence Citations | Selected Comments from Endorsement Participants                                                                                                                                                                                                                                                                                                                                                                                                                                                                                                                                                                                                                                                                                                                                                                                                                                                                                                                                                                                                                                                                |
|---------|-----------------------------------------------------------------------------------------------------------------------------------------------------------------------------------------------------|--------------------------------------------------------------------|----------------------------------------|----------------------------------------------------------------------------------------------------------------------------------------------------------------------------------------------------------------------------------------------------------------------------------------------------------------------------------------------------------------------------------------------------------------------------------------------------------------------------------------------------------------------------------------------------------------------------------------------------------------------------------------------------------------------------------------------------------------------------------------------------------------------------------------------------------------------------------------------------------------------------------------------------------------------------------------------------------------------------------------------------------------------------------------------------------------------------------------------------------------|
|         |                                                                                                                                                                                                     |                                                                    |                                        | <p>the language here?</p> <p>Internalized HIV Stigma and personal view on Discrimination also feeds into this in a Major way Do I withdraw and Isolate??</p> <p>Perhaps this should also include a recommendation around assessing of social networks/supports.</p>                                                                                                                                                                                                                                                                                                                                                                                                                                                                                                                                                                                                                                                                                                                                                                                                                                            |
| 9       | Rehabilitation professionals <u>should</u> be knowledgeable of <b>ageism</b> as an added layer of stigma that may increase existing HIV stigma and homophobia experienced by older adults with HIV. | 17 (89.5)                                                          | 10 (52.6)                              | <p>This is especially important with the MSM community as ageism is a problem in the community with HIV....</p> <p>Experiences with my own life and with those of friends when dealing with elderly parents has opened my eyes to the pervasiveness of family, friends, caregivers and health providers looking to what they call the best interests of the elderly and not to their expressed interests which have precedent in law.</p> <p>Ageism exists in rehab. It is unpleasant to experience it, and can be very dis-heartening.</p> <p>See previous comment- absolutely. Interweaving oppression. Language should reflect not additive "isms", but rather a multiplicative effect that mutually co-construct and reinforce each other.</p> <p>I think this applies to all elderly, not just HIV.</p> <p>As I get older I have become aware that there is little to no communication platform for younger and older Gays and as an older gay man it has been hammered in to me about the appropriateness of these relationships, often I am left feeling like I am a predator rather than an Elder.</p> |
| 10      | Rehabilitation professionals <u>should</u> understand the implications of <b>HIV disclosure</b> among older adults with HIV, be respectful of individualized choice                                 | 17 (89.5)                                                          | 8 (42.1)                               | <p>Strongly agree.</p> <p>I feel this statement is an excellent start but that 'implications of HIV Disclosure' should be further flushed</p>                                                                                                                                                                                                                                                                                                                                                                                                                                                                                                                                                                                                                                                                                                                                                                                                                                                                                                                                                                  |

| Number~ | Draft Recommendation                                                                                                                                                                                                                                                | Number of PLHIV and Clinicians who Endorsed the Recommendation (%) | # (%) who looked at Evidence Citations | Selected Comments from Endorsement Participants                                                                                                                                                                                                                                                                                                                                                                                                                                                                                                                                                                                                                                                                                                                                                                      |
|---------|---------------------------------------------------------------------------------------------------------------------------------------------------------------------------------------------------------------------------------------------------------------------|--------------------------------------------------------------------|----------------------------------------|----------------------------------------------------------------------------------------------------------------------------------------------------------------------------------------------------------------------------------------------------------------------------------------------------------------------------------------------------------------------------------------------------------------------------------------------------------------------------------------------------------------------------------------------------------------------------------------------------------------------------------------------------------------------------------------------------------------------------------------------------------------------------------------------------------------------|
|         | surrounding disclosure and be prepared to discuss ways to ensure clients obtain the necessary supports surrounding disclosure.                                                                                                                                      |                                                                    |                                        | <p>out...even if just to indicate where the implications may lie (social, legal, etc).</p> <p>Everyone wants privacy, especially, surrounding disease or disability. I know many who have experienced a lack of understanding in regards to their status.</p> <p>The rehabilitation professional should be part of a team to address these issues - this implies it is done in isolation a working as.</p> <p>I'm not sure I understand ALL the implications around disclosure after being infected for 25 years.</p> <p>HIV criminal law is a significant issue that will continue to impact PHAs including aging PHAs, many of whom may still be sexually active. This will be an important topic for care givers to have basic knowledge, proper referrals and strong/clear policies and procedures in place.</p> |
| 11      | Rehabilitation professionals <u>should</u> be knowledgeable about the importance of <b>social relationships</b> and the need for <b>emotional and practical social support</b> to maximize physical, mental and psychological well-being for older adults with HIV. | 18 (94.7)                                                          | 10 (52.6)                              | Social support plays a very important part in the success of any treatment/intervention plans with people living with HIV, especially those of older adults. Hence it is important to understand the impact (positive or negative) of the client's closest relationships as well as their social circle in general while assessing and planning their course of treatment.                                                                                                                                                                                                                                                                                                                                                                                                                                           |
| 12      | Rehabilitation professionals <u>should</u> consider the role of <b>self-management strategies</b> to promote health and wellness among older adults living with HIV.                                                                                                | 18 (94.7)                                                          | 9 (47.4)                               | <p>The rehab recommendations may be used for several years. Self management to the best degree is vital.</p> <p>Self-management strategies such as learning to cope with pain, managing medications efficiently are some of the interventions that have worked very well with people living with HIV in my practice.</p> <p>Is there a way to determine whether or not someone has Healthy coping strategies or not How would resilience be determined?</p>                                                                                                                                                                                                                                                                                                                                                          |

| Number~ | Draft Recommendation                                                                                                                                                                                                                                                                                                                                                                                                                                                                                                    | Number of PLHIV and Clinicians who Endorsed the Recommendation (%) | # (%) who looked at Evidence Citations | Selected Comments from Endorsement Participants                                                                                                                                                                                                                                                                                                                                                                                                                                                                                                                                                                                                                                                                                                                                                                                                                                                                                                                                                                 |
|---------|-------------------------------------------------------------------------------------------------------------------------------------------------------------------------------------------------------------------------------------------------------------------------------------------------------------------------------------------------------------------------------------------------------------------------------------------------------------------------------------------------------------------------|--------------------------------------------------------------------|----------------------------------------|-----------------------------------------------------------------------------------------------------------------------------------------------------------------------------------------------------------------------------------------------------------------------------------------------------------------------------------------------------------------------------------------------------------------------------------------------------------------------------------------------------------------------------------------------------------------------------------------------------------------------------------------------------------------------------------------------------------------------------------------------------------------------------------------------------------------------------------------------------------------------------------------------------------------------------------------------------------------------------------------------------------------|
| 13      | Rehabilitation professionals <u>may consider</u> the importance and role of <b>spirituality</b> in the health of older adults with HIV depending on the individual.                                                                                                                                                                                                                                                                                                                                                     | 16 (84.2)                                                          | 7 (36.8)                               | <p>I see spirituality as including the expression of humanity and commonalities between health providers and PHAs.</p> <p>I am very pleased to see this area included and strongly support this recommendation. Quite often overlooked at any stage of HIV infection and other health-related issues.</p> <p>It was something I needed and had to search for. Not sure how important it is to the HIV community specifically.</p> <p>Very important in my experience.</p> <p>We have left Spirituality out of many conversations because it is too contentious, it needs to be reintroduced. The fruit of the Spirit is Love, Joy, Peace, Patience, Kindness Goodness, Faithfulness, Gentleness and Self-control. Quote from Rev. Brent Hawkes.</p> <p>I actually think professionals SHOULD consider this, however, it's very complicated and most professionals would not differentiate religion from spirituality which would often be quite negative so this recommendation makes sense in that regard.</p> |
| 14      | Rehabilitation professionals <u>should</u> use an <b>interprofessional approach to practice</b> that is sensitive to the unique and individualized <b>values and preferences</b> of older adults with HIV while considering issues of culture, stigma and discrimination. Specifically rehabilitation professionals should communicate information surrounding care, treatment and education in a way is tailored to the specific needs of older adults with HIV to optimize physical and mental health and well-being. | 18 (84.7)                                                          | 9 (47.4)                               | <p>Strongly endorse this recommendation.</p> <p>Holistic approaches seem to work best.</p> <p>Each individual in spite of disease or disability has similar needs.</p> <p>As rehab professionals, it is very important to adapt an inter-professional approach to provide client centered care. Clients may need better interpretation of impairments described to them by their doctors in terms of functional limitations, or strategies to overcome these limitations. Hence open dialogue is very necessary within the treatment</p>                                                                                                                                                                                                                                                                                                                                                                                                                                                                        |

| Number~ | Draft Recommendation                                                                                                                                                                                                                                                                                                                                                                                             | Number of PLHIV and Clinicians who Endorsed the Recommendation (%) | # (%) who looked at Evidence Citations | Selected Comments from Endorsement Participants                                                                                                                                                                                                                                                                    |
|---------|------------------------------------------------------------------------------------------------------------------------------------------------------------------------------------------------------------------------------------------------------------------------------------------------------------------------------------------------------------------------------------------------------------------|--------------------------------------------------------------------|----------------------------------------|--------------------------------------------------------------------------------------------------------------------------------------------------------------------------------------------------------------------------------------------------------------------------------------------------------------------|
|         |                                                                                                                                                                                                                                                                                                                                                                                                                  |                                                                    |                                        | team to better plan care.kakk                                                                                                                                                                                                                                                                                      |
| 15      | Rehabilitation professionals <u>should</u> inquire about the nature and extent to which older adults with HIV use <b>complementary and alternative medicine (CAM)</b> and consider the potential benefits and side effects of CAM interventions.                                                                                                                                                                 | 16 (84.2)                                                          | 9 (47.4)                               | For many PHAs these options are financially out of reach. Still would be good to know for the rehab provider.                                                                                                                                                                                                      |
| 16      | <b>Exercise (specifically progressive resistive exercise)</b> <u>may be recommended</u> for associated improvements in strength, body composition, and physical fitness in older adults living with HIV. Specifically, resistive exercise may be considered for use among older adults who are frail or debilitated to increase muscle strength and mitigate wasting.                                            | 15 (78.9)                                                          | 8 (42.1)                               | I do this kind of work every day with seniors and with people living with dementia. I am a believer, but find few want to pay to get good fitness provided in this area.<br><br>For older patients I think you have to tailor the degree or exercise to the degree of frailty.<br><br>Probably works for everyone. |
| 17      | <b>Aerobic and resistive exercise</b> <u>may be recommended</u> for at least 20 minutes at least 3 times per week for at least 5 weeks for older adults living with HIV who are medically stable with the potential to maintain or enhance outcomes of cardiopulmonary fitness, weight and body composition, strength, and quality of life.                                                                      | 16 (84.2)                                                          | 9 (47.4)                               | Are there no studies using the benefits of Yoga or Tai Chi for older populations it would seem to be a more holistic with its combination of strength, balance, agility, and mental focus.                                                                                                                         |
| 18      | Regular forms of <b>exercise</b> including (strength/resistance training, aerobic/cardiovascular endurance training, and balance/stability training) may be <u>strongly recommended</u> for older adults with HIV who are medically stable to reduce fall rates, improve functional and physical performance, improve cardiopulmonary fitness, reduce depressive symptoms, and improve mood and quality of life. | 16 (84.2)                                                          | 8 (42.1)                               | Poverty among PHAs means that home-based exercise may be the only viable option.<br><br>I don't like home based there is no added value like interpersonal contact and association Group energy can be synergistic.                                                                                                |
| 19      | <b>Multidisciplinary forms of rehabilitation</b> is strongly recommended for older adults                                                                                                                                                                                                                                                                                                                        | 18 (94.7)                                                          | 8 (42.1)                               | I more strongly endorse follow up with a similar course of action to avoid re-hospitalization.                                                                                                                                                                                                                     |

| Number~ | Draft Recommendation                                                                                                                                                                                                                                                                                                                                                                                                                              | Number of PLHIV and Clinicians who Endorsed the Recommendation (%) | # (%) who looked at Evidence Citations | Selected Comments from Endorsement Participants                                                                                                                                                                                                                                                                                                                                                                                                                      |
|---------|---------------------------------------------------------------------------------------------------------------------------------------------------------------------------------------------------------------------------------------------------------------------------------------------------------------------------------------------------------------------------------------------------------------------------------------------------|--------------------------------------------------------------------|----------------------------------------|----------------------------------------------------------------------------------------------------------------------------------------------------------------------------------------------------------------------------------------------------------------------------------------------------------------------------------------------------------------------------------------------------------------------------------------------------------------------|
|         | with HIV who are hospitalized to promote earlier discharge directly home from hospital and reduced costs associated with hospitalization.                                                                                                                                                                                                                                                                                                         |                                                                    |                                        | PT/OT/SW trifecta works well in emergency environments and others.<br><br>This is critical.                                                                                                                                                                                                                                                                                                                                                                          |
| 20      | <b>Occupational therapy</b> may be an important component of rehabilitation for older adults living with HIV with functional impairments and is strongly recommended for elderly community dwellers, specifically for advising on adaptive devices; mobility devices; energy conservation; cognitive training; training of skills to use adaptive devices to enhance functional ability, and to enhance social participation and quality of life. | 18 (94.7)                                                          | 8 (42.1)                               | In my practice with people living with HIV, I have found an indispensable role for OT in terms of areas described above such as adaptive devices, mobility devices, energy conservation and cognitive strategies. OT was well received.<br><br>Is training on using social media part of this?? i.e. computer training and the use of things like learning about facebook or even how to set up your own blog or how to find web sites and information in searches?? |
| 21      | <b>Supervised exercise sessions</b> <u>should be recommended</u> to older adults living with HIV with knee and/or hip osteoarthritis (OA) who are medically stable to improve pain and physical function. A combination of low impact exercise in the form of jogging, stair climbing and walking, combining with high-magnitude resistance training should be recommended for older adults with HIV to preserve bone mineral density.            | 14 (73.7)                                                          | 6 (31.6)                               | Need to recognize the feasibility of implementing these types of supervised programs accepting the other social issues in HIV.<br><br>Although I don't agree that these should be the only options explored again Yoga and tai chi also provide good results maybe just not researched well.<br><br>I endorse based on this process and evidence but have no personal or direct professional opinion.                                                                |
| 22      | <b>Balance and strengthening exercises</b> <u>should</u> be part of an overall exercise program to decrease falls and risk of fall-related fractures for older adults with HIV and low bone mineral density (BMD).                                                                                                                                                                                                                                | 17 (89.5)                                                          | 7 (36.8)                               | No comments                                                                                                                                                                                                                                                                                                                                                                                                                                                          |
| 23      | <b>Multidisciplinary rehabilitation teams</b> comprised of OT and PT across the continuum of care should be recommended for older adults with HIV who sustain a hip fracture. Specifically,                                                                                                                                                                                                                                                       | 16 (84.2)                                                          | 6 (31.6)                               | If a high frequency program was available as an outpatient could this possibly be as good as inpatient?<br><br>My experience with the elderly in long-term care homes showed me that rehab programming for the elderly was                                                                                                                                                                                                                                           |

| Number~ | Draft Recommendation                                                                                                                                                                                                                                                                                                                                                                                                                                                                                                                                                        | Number of PLHIV and Clinicians who Endorsed the Recommendation (%) | # (%) who looked at Evidence Citations | Selected Comments from Endorsement Participants                                                                                                                                                          |
|---------|-----------------------------------------------------------------------------------------------------------------------------------------------------------------------------------------------------------------------------------------------------------------------------------------------------------------------------------------------------------------------------------------------------------------------------------------------------------------------------------------------------------------------------------------------------------------------------|--------------------------------------------------------------------|----------------------------------------|----------------------------------------------------------------------------------------------------------------------------------------------------------------------------------------------------------|
|         | inpatient geriatric rehabilitation programs are strongly recommended and may be an ideal intervention as they have the potential to reduce nursing home admission, mortality and improve functional status.                                                                                                                                                                                                                                                                                                                                                                 |                                                                    |                                        | minimal. As time passed person after person lost mobility leading eventually to life in a wheel chair.<br><br>So spend some time on determining which interventions and outcomes would be most suitable. |
| 24      | <b>Self-management programs</b> may be considered as a component of a rehabilitation program to address disability and pain for older adults living with HIV and arthritis.                                                                                                                                                                                                                                                                                                                                                                                                 | 15 (78.9)                                                          | 7 (36.8)                               | How well would these work in HIV with other issues?<br><br>It would depend on the person's ability of self-discipline.                                                                                   |
| 25      | A combination of <b>aerobic and resistance</b> exercise at moderate intensity <u>may be recommended</u> for older adults living with HIV and cancer to reduce cancer-related fatigue during and after treatment for cancer. Any exercise intervention should be individualized based on the targeted health outcome and cancer type.                                                                                                                                                                                                                                        | 14 (73.7)                                                          | 8 (42.1)                               | Too often we look at our limitations NOT what we can still do or how we just do it differently.<br><br>I endorse based on this process and evidence but have no personal or direct professional opinion. |
| 26      | A combination of <b>aerobic and resistive exercise</b> at least twice a week for at least 2 weeks at 50-90% VO2max intensity is safe and <u>may be recommended</u> for older adults living with cancer for improvements in physiological measures, symptoms, physical and psychosocial functioning of patients and health-related QOL. Positive effects of exercise may vary significantly as a function of the type of cancer; the stage of disease; the medical treatment; the nature, intensity, and duration of the exercise program; and the lifestyle of the patient. | 13 (68.4)                                                          | 6 (31.6)                               | I endorse based on this process and evidence but have no personal or direct professional opinion.                                                                                                        |
| 27      | <b>Exercise</b> may be beneficial for self-empowerment and <u>should</u> be recommended for older adults living with HIV who are also living with lung cancer                                                                                                                                                                                                                                                                                                                                                                                                               | 14 (73.7)                                                          | 7 (36.8)                               | I endorse based on this process and evidence but have no personal or direct professional opinion.                                                                                                        |



| Number~ | Draft Recommendation                                                                                                                                                                                                                                                                                                                                                                                                                                                                                                                                                                                                                                                                                                                                                    | Number of PLHIV and Clinicians who Endorsed the Recommendation (%) | # (%) who looked at Evidence Citations | Selected Comments from Endorsement Participants                                                                                                                                                                                        |
|---------|-------------------------------------------------------------------------------------------------------------------------------------------------------------------------------------------------------------------------------------------------------------------------------------------------------------------------------------------------------------------------------------------------------------------------------------------------------------------------------------------------------------------------------------------------------------------------------------------------------------------------------------------------------------------------------------------------------------------------------------------------------------------------|--------------------------------------------------------------------|----------------------------------------|----------------------------------------------------------------------------------------------------------------------------------------------------------------------------------------------------------------------------------------|
| 28      | <p>who are medically stable.</p> <p><b>Supervised aerobic exercise programmes</b> should be included during breast cancer treatment for the management of cancer related fatigue for older women living with HIV and breast cancer who are medically stable. A combination of aerobic and resistive exercise at least 3 times per week for at least 6 weeks, 30-40 minutes per session, at moderate intensity (e.g. rate of perceived exertion 11-13 out of 20) appears to be safe and may be recommended for older women living with HIV undergoing or who have undergone treatment for breast cancer and who are medically stable for potential improvements in cardiopulmonary fitness, physical functioning, fatigue, and body composition and quality of life.</p> | 14 (73.7)                                                          | 7 (36.8)                               | <p>although all these may be needed to be presented as a longitudinal lifestyle change not just short term interventions.</p> <p>I endorse based on this process and evidence but have no personal or direct professional opinion.</p> |
| 29      | <p>A combination of <b>aerobic and resistive exercise</b> <u>may be recommended</u> for older adults living with HIV and metastatic cancer (either HIV-related or not) who are medically stable for improvements in quality of life and physical health status.</p>                                                                                                                                                                                                                                                                                                                                                                                                                                                                                                     | 10 (52.6)<br><i>[deleted from the final recommendations]</i>       | 8 (42.1)                               | <p>Not all HEALING requires a CURE. Acceptance doesn't preclude fighting.</p> <p>I endorse based on this process and evidence but have no personal or direct professional opinion.</p>                                                 |
| 30      | <p>Inconclusive or insufficient evidence exists to derive recommendations for <b>cognitive rehabilitation</b> interventions for older adults with HIV and stroke. While cognitive rehabilitation does not appear harmful, weak evidence exists to support the use of cognitive-specific interventions to improve spatial neglect, disability, memory, and functional status for older adults who experience stroke. Rehabilitation professionals should implement specific task oriented training</p>                                                                                                                                                                                                                                                                   | 19 (100)                                                           | 6 (31.6)                               | <p>There needs to be age targets for baseline determinants.</p> <p>Key to determine baseline and monitor for non-stroke related cognitive issues and required support/care.</p>                                                        |

| Number~ | Draft Recommendation                                                                                                                                                                                                                                                                                                                                                                                                                                                                                                                                                                                                                               | Number of PLHIV and Clinicians who Endorsed the Recommendation (%) | # (%) who looked at Evidence Citations | Selected Comments from Endorsement Participants                                                                                                                                                                                                                                                                                                           |
|---------|----------------------------------------------------------------------------------------------------------------------------------------------------------------------------------------------------------------------------------------------------------------------------------------------------------------------------------------------------------------------------------------------------------------------------------------------------------------------------------------------------------------------------------------------------------------------------------------------------------------------------------------------------|--------------------------------------------------------------------|----------------------------------------|-----------------------------------------------------------------------------------------------------------------------------------------------------------------------------------------------------------------------------------------------------------------------------------------------------------------------------------------------------------|
|         | with older adults living with HIV and stroke as this approach is key to retraining skill specific tasks related to function.                                                                                                                                                                                                                                                                                                                                                                                                                                                                                                                       |                                                                    |                                        |                                                                                                                                                                                                                                                                                                                                                           |
| 31      | <b>Stroke rehabilitation</b> for older adults with HIV <u>should</u> multi-disciplinary including occupational therapy, physical therapy, and speech-language pathology to improve the ability to undertake personal activities of daily living and reduce risk of deterioration in ability. Stroke rehabilitation may include the following components: therapeutic exercise, task-oriented training, gait-oriented training, balance training, strength training, wheelchair mobility, home modification, cognitive adaptation, and treatment of shoulder subluxation for those who experience a sub-acute or post-acute stroke (within 1 year). | 19 (100)                                                           | 7 (36.8)                               | No comments                                                                                                                                                                                                                                                                                                                                               |
| 32      | There exists inconclusive or insufficient evidence on the effectiveness of <b>long-term rehabilitation interventions</b> on patient or carer outcomes 1 year post stroke are to provide a recommendation for older adults with HIV and stroke.                                                                                                                                                                                                                                                                                                                                                                                                     | *9 (47.4)<br><i>[deleted from final recommendations]</i>           | 8 (42.1)                               | I do not understand this recommendation.<br><br>I'm unclear as to what is recommended here - further action or no action after a year.<br><br>I see improvements in post-stroke patients days, weeks, months and years after their strokes.<br><br>I found the wording of that recommendation confusing - I am not sure what the exact recommendation is. |
| 33      | <b>Occupational therapy</b> <u>should</u> be recommended as a component of rehabilitation for older adults living with HIV with stroke as interventions targeted towards personal activities of daily living may increase ADLs and reduced death, deterioration and dependency.                                                                                                                                                                                                                                                                                                                                                                    | 17 (89.5)                                                          | 7 (36.8)                               | No Comments                                                                                                                                                                                                                                                                                                                                               |
| 34      | <b>Physiotherapy</b> comprised of a                                                                                                                                                                                                                                                                                                                                                                                                                                                                                                                                                                                                                | 17 (89.5)                                                          | 5 (26.3)                               | I endorse based on this process and evidence but have no                                                                                                                                                                                                                                                                                                  |

| Number~ | Draft Recommendation                                                                                                                                                                                                                                                                                                                                                                                                                                                                                                                                                                                     | Number of PLHIV and Clinicians who Endorsed the Recommendation (%) | # (%) who looked at Evidence Citations | Selected Comments from Endorsement Participants                                                   |
|---------|----------------------------------------------------------------------------------------------------------------------------------------------------------------------------------------------------------------------------------------------------------------------------------------------------------------------------------------------------------------------------------------------------------------------------------------------------------------------------------------------------------------------------------------------------------------------------------------------------------|--------------------------------------------------------------------|----------------------------------------|---------------------------------------------------------------------------------------------------|
|         | combination of interventions <u>should</u> be recommended for the recovery of postural control and lower limb function for older adults living with HIV following stroke.                                                                                                                                                                                                                                                                                                                                                                                                                                |                                                                    |                                        | personal or direct professional opinion.                                                          |
| 35      | <b>Electromechanical-assisted gait training</b> in combination with physiotherapy <u>may be recommended</u> for older adults living with HIV with stroke (particularly those within 3 months post stroke) as this intervention is associated with a higher likelihood to achieve independent walking than gait training alone.                                                                                                                                                                                                                                                                           | 12 (63.2)                                                          | 5 (26.3)                               | I endorse based on this process and evidence but have no personal or direct professional opinion. |
| 36      | <b>Combined aerobic and resistive exercise</b> <u>should</u> be a component of stroke rehabilitation for older adults living with HIV with stroke who are medically stable at any stage of motor recovery. Higher doses of exercise may be associated with better motor recovery. Specifically, cardiorespiratory training should be a component of exercise as evidence suggests speed, tolerance and independence during walking are improved. Specifically, strength training may be a component as this can improve muscle strength in stroke patients and will not necessarily increase spasticity. | 15 (78.9)                                                          | 4 (21.1)                               | No Comments                                                                                       |
| 37      | <b>Electrotherapeutic modalities</b> <u>alone are not recommended</u> for older adults living with HIV with stroke over conventional rehabilitation interventions strategies. There exists very weak to no evidence to support the use of electrotherapeutic modalities (functional electrical stimulation, biofeedback, visual feedback therapy) over conventional PT                                                                                                                                                                                                                                   | 10 (52.6)                                                          | 4 (21.1)                               | No Comments                                                                                       |

| Number~ | Draft Recommendation                                                                                                                                                                                                                                                                                                                                                                                                                                                                                                                              | Number of PLHIV and Clinicians who Endorsed the Recommendation (%) | # (%) who looked at Evidence Citations | Selected Comments from Endorsement Participants                                                 |
|---------|---------------------------------------------------------------------------------------------------------------------------------------------------------------------------------------------------------------------------------------------------------------------------------------------------------------------------------------------------------------------------------------------------------------------------------------------------------------------------------------------------------------------------------------------------|--------------------------------------------------------------------|----------------------------------------|-------------------------------------------------------------------------------------------------|
|         | interventions along for muscle strength recovery, upper limb recovery or balance post stroke.                                                                                                                                                                                                                                                                                                                                                                                                                                                     |                                                                    |                                        |                                                                                                 |
| 38      | <b>Cardiac rehabilitation</b> in the form of home-based or centre-based care <u>may be recommended</u> because these appear equally effective in improving the clinical & health related quality of life outcomes for older adults with HIV with low risk cardiovascular disease. The choice of home versus centre-based care should be reflective of the individual preference of the patient as this may impact the uptake of rehabilitation.                                                                                                   | 15 (78.9)                                                          | 6 (31.6)                               | Strongly support this recommendation.                                                           |
| 39      | <b>Cardiac rehabilitation</b> for older adults with HIV should include reinforcement, feedback, offer opportunity for individualization, facilitate behaviour change through skills and resources and be relevant to patients needs and abilities. Specifically, motivational communication such as formal cardiac rehabilitation program referral, reminder letters, phone calls and home visits may be recommended for increasing uptake and adherence of cardiac rehabilitation among older adults living with HIV and cardiovascular disease. | 16 (84.2)                                                          | 5 (26.3)                               | Would this include an ability to determine emotional state depression would affect motivation?  |
| 40      | <b>Exercise-based cardiac rehabilitation</b> <u>should be recommended</u> for older adults with HIV who have undergone a myocardial infarction (MI) (otherwise known as a heart attack) (or at risk of an MI) given evidence suggests exercise based cardiac rehabilitation is effective in reducing cardiac deaths. The ideal frequency, intensity, time and type of                                                                                                                                                                             | *14 (73.7)                                                         | 4 (21.1)                               | Endorse based on this process and evidence but have no personal or direct professional opinion. |

| Number~ | Draft Recommendation                                                                                                                                                                                                                                                                                                                                                                                                                                                                                                                                                                                                                                                                                                                                                                     | Number of PLHIV and Clinicians who Endorsed the Recommendation (%) | # (%) who looked at Evidence Citations | Selected Comments from Endorsement Participants                                                                                                                                                                                                     |
|---------|------------------------------------------------------------------------------------------------------------------------------------------------------------------------------------------------------------------------------------------------------------------------------------------------------------------------------------------------------------------------------------------------------------------------------------------------------------------------------------------------------------------------------------------------------------------------------------------------------------------------------------------------------------------------------------------------------------------------------------------------------------------------------------------|--------------------------------------------------------------------|----------------------------------------|-----------------------------------------------------------------------------------------------------------------------------------------------------------------------------------------------------------------------------------------------------|
|         | exercise to maximize benefits are unclear. Early mobilization and rehabilitation and specifically, secondary and tertiary prevention programs (including counseling, education, and exercise) should be recommended to older adults living with HIV who experience an MI as these have the potential to reduce subsequent MI and mortality and improve processes of care, risk factor profiles and functional status and quality of life.                                                                                                                                                                                                                                                                                                                                                |                                                                    |                                        |                                                                                                                                                                                                                                                     |
| 41      | <b>Moderate intensity exercise</b> (and potentially progressive resistive exercise) should be recommended for older adults with HIV with cardiovascular disease who are medically stable to reduce high blood pressure and potentially mitigate the effect of coronary heart disease. Exercise may be associated with improved cardiovascular health and well-being as a result of enhanced self-efficacy. More research is required to determine the ideal frequency and duration of exercise that should be recommended to see psychological improvement. High intensity aerobic exercise may increase HDL-C levels, while combined aerobic and resistance exercise may lower LDL-C levels and should be recommended for older adults with HIV to improve their cardiovascular health. | 16 (84.2)                                                          | 5 (26.3)                               | Again I refer to yoga.                                                                                                                                                                                                                              |
| 42      | <b>Home-based moderate intensity exercise</b> (and potentially progressive resistive exercise) as well as <b>supervised and hospital-based exercise programs</b> appear to be safe and <u>should be recommended</u> for older adults with HIV and heart failure                                                                                                                                                                                                                                                                                                                                                                                                                                                                                                                          | *14 (73.7)                                                         | 4 (21.1)                               | I think that what is not addressed for many of these recommendations is lack of funding for them at home or in day care settings.<br><br>Programs need not be hospital based.... development of community partner links would probably be more cost |

| Number~ | Draft Recommendation                                                                                                                                                                                                                                                                                                                                      | Number of PLHIV and Clinicians who Endorsed the Recommendation (%) | # (%) who looked at Evidence Citations | Selected Comments from Endorsement Participants                                                                                                                                                                                                                                                                                                                      |
|---------|-----------------------------------------------------------------------------------------------------------------------------------------------------------------------------------------------------------------------------------------------------------------------------------------------------------------------------------------------------------|--------------------------------------------------------------------|----------------------------------------|----------------------------------------------------------------------------------------------------------------------------------------------------------------------------------------------------------------------------------------------------------------------------------------------------------------------------------------------------------------------|
|         | who are medically stable for potential improvements in cardiac function, exercise capacity (including peak oxygen consumption), physical function, mortality and quality of life and potentially a reduction in hospital admissions. Optimal session frequency, session duration, exercise intensity, program duration is unclear.                        |                                                                    |                                        | effective and affordable for all parties senior programs may need better development and funding.                                                                                                                                                                                                                                                                    |
| 43      | <b>Aerobic exercise</b> (and possibly resistive exercise) at least 3 times per week may be recommended to older adults living with HIV and hyperlipidemia for the potential to improve blood lipids. Clinical importance of the changes are questionable.                                                                                                 | *14 (73.7)                                                         | 3 (15.8)                               | <p>Recommending fitness is not enough. There should be programs to help the client succeed with the fitness recommendations.</p> <p>I endorse based on this process and evidence but have no personal or direct professional opinion.</p>                                                                                                                            |
| 44      | Inconclusive or insufficient evidence exists to support a recommendation for a specific model of mental health care (acute psychogeriatric care over acute psychiatric units versus other mental health services) for older adults with HIV living with mental health issues. More research is needed before recommending one model of care over another. | 17 (89.5)                                                          | 6 (31.6)                               | Do we have the resources to be able to ask care units to engage in this kind of placement strategy or patient tracking?                                                                                                                                                                                                                                              |
| 45      | <b>Exercise</b> appears safe and <u>should be recommended</u> (approximately 30 minutes per session) to older adults with HIV living with other chronic conditions illnesses such as CVD, cancer, chronic pain, fibromyalgia as a way to mitigate symptoms of anxiety.                                                                                    | 16 (84.2)                                                          | 6 (31.6)                               | <p>Not sure about the second part "to mitigate anxiety" in this population of HIV positive.</p> <p>There is an old exercise regime for the cure or relief of fibromyalgia I'm not convinced that my pain level isn't a function of time accumulation without relief of pain my pain isn't treated and so my pain just keeps being reinforced AND added to daily.</p> |
| 46      | Inconclusive or insufficient evidence exists to support the use of <b>cognitive behavioural therapy</b> with older adults with HIV and depression.                                                                                                                                                                                                        | 14 (73.7)                                                          | 9 (47.4)                               | <p>Is there any information on Mindfulness Based Approach?</p> <p>I'm unclear as to what is recommended - action or no action.</p>                                                                                                                                                                                                                                   |

| Number~ | Draft Recommendation                                                                                                                                                                                                                                                                                                                                                                                      | Number of PLHIV and Clinicians who Endorsed the Recommendation (%) | # (%) who looked at Evidence Citations | Selected Comments from Endorsement Participants                                                                                                                                                                                                                                                                                                                                                                                                                                                                                                                                                                                                                                                                                                                                     |
|---------|-----------------------------------------------------------------------------------------------------------------------------------------------------------------------------------------------------------------------------------------------------------------------------------------------------------------------------------------------------------------------------------------------------------|--------------------------------------------------------------------|----------------------------------------|-------------------------------------------------------------------------------------------------------------------------------------------------------------------------------------------------------------------------------------------------------------------------------------------------------------------------------------------------------------------------------------------------------------------------------------------------------------------------------------------------------------------------------------------------------------------------------------------------------------------------------------------------------------------------------------------------------------------------------------------------------------------------------------|
|         |                                                                                                                                                                                                                                                                                                                                                                                                           |                                                                    |                                        | <p>Regardless of intervention, metastudies show that it is the nature of the therapeutic relationship that makes the difference, therefore, clinicians should be able to work in a multitude of cognitive, behavioural, and emotion-focused modes of treatment.</p> <p>It would have to be individually based as to whether someone would benefit from cognitive behavioral therapy (CBT) - and not diagnosis/population based.</p> <p>This has worked for me I have many learned tools in my kit some I use daily.</p> <p>You should however mention that there is strong evidence for CBT (at least I thought there was) for CBT in younger adults with HIV.</p> <p>Anecdotally, CBT and other mental health interventions are important resources and options for good care.</p> |
| 47      | Supporting older adults living with HIV in securing <b>safe and stable housing</b> <u>should</u> be an important component of the rehabilitation process for older adults with HIV with severe mental illness given the positive impact of stable housing for this target population.                                                                                                                     | 18 (94.7)                                                          | 6 (31.6)                               | <p>Highly important, given the high levels of poverty among PHAs.</p> <p>Yes, in many cases housing first strategies are successful in mitigating mental health issues.</p> <p>Safe and secure housing should be a right for ALL people please refer to Positive spaces, Healthy spaces study.</p>                                                                                                                                                                                                                                                                                                                                                                                                                                                                                  |
| 48      | <b>Cognitive interventions</b> including cognitive training, cognitive stimulation, and cognitive rehabilitation <u>should</u> be recommended for older adults living with HIV with mild cognitive impairment because they are associated with significant improvements objective and subjective measures of memory, quality of life and mood / anxiety with benefits translated to improvements in daily | 17 (89.5)                                                          | 7 (36.8)                               | It is unclear whether this applies to HIV associated dementia Probably wouldn't hurt but may be expensive and resource intensive.                                                                                                                                                                                                                                                                                                                                                                                                                                                                                                                                                                                                                                                   |

| Number~ | Draft Recommendation                                                                                                                                                                                                                                                                                                                                                                                                                                                                                                                                                                                                                                                                                                                                                                                                            | Number of PLHIV and Clinicians who Endorsed the Recommendation (%) | # (%) who looked at Evidence Citations | Selected Comments from Endorsement Participants                                                                                                                                       |
|---------|---------------------------------------------------------------------------------------------------------------------------------------------------------------------------------------------------------------------------------------------------------------------------------------------------------------------------------------------------------------------------------------------------------------------------------------------------------------------------------------------------------------------------------------------------------------------------------------------------------------------------------------------------------------------------------------------------------------------------------------------------------------------------------------------------------------------------------|--------------------------------------------------------------------|----------------------------------------|---------------------------------------------------------------------------------------------------------------------------------------------------------------------------------------|
|         | functioning and mood. Specifically, errorless learning may be recommended for a potential positive effect on recall for older adults with HIV and cognitive impairment.                                                                                                                                                                                                                                                                                                                                                                                                                                                                                                                                                                                                                                                         |                                                                    |                                        |                                                                                                                                                                                       |
| 49      | A combination of <b>aerobic and resistive (strengthening) exercise</b> <u>should be recommended</u> for older adults living with HIV with cognitive impairment for improvements in fitness, physical function, cognitive function, and positive behavior. Evidence suggests older adults with cognitive impairment may benefit from exercise as much as older adults with no cognitive impairment. Due to diversity in exercise programs, measures of cognition, and study populations in the evidence, the optional type of exercise program (content, intensity, frequency, and duration) is unclear. Specifically, aerobic exercise may be associated with improvements in neurocognitive function among older adults with HIV with cognitive impairment for attention and processing speed, executive function, and memory. | 18 (94.7)                                                          | 7 (36.8)                               | Again yoga utilizes mental focus for exercises.                                                                                                                                       |
| 50      | Physical exercise appears to be safe and may be recommended for older adults living with HIV and dementia however insufficient evidence exists to suggest benefits to cognition, function, behaviour, depression, and mortality.                                                                                                                                                                                                                                                                                                                                                                                                                                                                                                                                                                                                | 15 (78.9)                                                          | 6 (31.6)                               | I lead a dementia friendly class twice a week. The results are great and the group shows up consistently and we have fun.                                                             |
| 51      | <b>Pulmonary rehabilitation</b> (including upper and lower extremity exercise, inspiratory muscle training and breathing exercises) for at least four weeks is <u>safe and strongly recommended</u> for older adults living with                                                                                                                                                                                                                                                                                                                                                                                                                                                                                                                                                                                                | 14 (73.7)                                                          | 5 (26.3)                               | Important, given high levels of smoking at some point in lifetime among PHAs.<br><br><b>C032-</b> This needs to be rolled out as a lifestyle change not just short term intervention. |



| Number~ | Draft Recommendation                                                                                                                                                                                                                                                                                                                                                                                                                                                                                            | Number of PLHIV and Clinicians who Endorsed the Recommendation (%) | # (%) who looked at Evidence Citations | Selected Comments from Endorsement Participants                                                                                                                              |
|---------|-----------------------------------------------------------------------------------------------------------------------------------------------------------------------------------------------------------------------------------------------------------------------------------------------------------------------------------------------------------------------------------------------------------------------------------------------------------------------------------------------------------------|--------------------------------------------------------------------|----------------------------------------|------------------------------------------------------------------------------------------------------------------------------------------------------------------------------|
|         | <p>HIV who have COPD to reduce mortality, improve dyspnea, health-related quality of life, functional exercise capacity and reduce future hospital admissions. Individuals with more severe COPD may require longer rehabilitation programs of at least 6 months to demonstrate benefits.</p>                                                                                                                                                                                                                   |                                                                    |                                        | <p>I endorse based on this process and evidence but have no personal or direct professional opinion.</p>                                                                     |
| 52      | <p><b>Aerobic and progressive resistance exercise</b> at least two times per week for at least 8 weeks appears feasible, safe and may be recommended for older adults with HIV with mild to moderate COPD for improvements in exercise capacity and muscle strength that may translate into improved activity performance and societal participation. Careful consideration is required when prescribing progressive resistance exercise programs for people with COPD who have comorbid health conditions.</p> | 13 (68.4)                                                          | 4 (21.1)                               | <p>I endorse based on this process and evidence but have no personal or direct professional opinion.</p>                                                                     |
| 53      | <p><b>Inspiratory muscle training (IMT)</b> in the form of targeted, threshold or normocapneic hyperventilation is an important component of pulmonary rehabilitation and is <u>strongly recommended</u> for older adults living with HIV with COPD to improve inspiratory muscle strength and endurance, dyspnea, exercise capacity and quality of life. Optimal frequency, intensity, supervision and duration of IMT is unclear.</p>                                                                         | 12 (63.2)                                                          | 5 (26.3)                               | <p>I endorse based on this process and evidence but have no personal or direct professional opinion.</p>                                                                     |
| 54      | <p><b>Aerobic resistive exercise</b> for at least 8 weeks is strongly recommended for older adults living with HIV with diabetes (type 2) to improve cardiopulmonary fitness and ensure glucose control. Optimal</p>                                                                                                                                                                                                                                                                                            | 17 (89.5)                                                          | (21.1)                                 | <p>What happens after 8 weeks - it doesn't work or they should stop.</p> <p>Important since diabetes is increasingly seen in PHAs as a result of treatment side effects.</p> |

1  
2  
3  
4  
5  
6  
7  
8  
9  
10  
11  
12  
13  
14  
15  
16  
17  
18  
19  
20  
21  
22  
23  
24  
25  
26  
27  
28  
29  
30  
31  
32  
33  
34  
35  
36  
37  
38  
39  
40  
41  
42  
43  
44  
45  
46  
47  
48  
49

| Number~ | Draft Recommendation                                                                                                                                                                                                                                         | Number of PLHIV and Clinicians who Endorsed the Recommendation (%) | # (%) who looked at Evidence Citations | Selected Comments from Endorsement Participants |
|---------|--------------------------------------------------------------------------------------------------------------------------------------------------------------------------------------------------------------------------------------------------------------|--------------------------------------------------------------------|----------------------------------------|-------------------------------------------------|
|         | frequency, intensity, time and type of exercise are unclear however evidence suggests increased exercise prescription, fitness testing, supervision and group sessions at a greater number of times per week may be associated with greater health benefits. |                                                                    |                                        |                                                 |

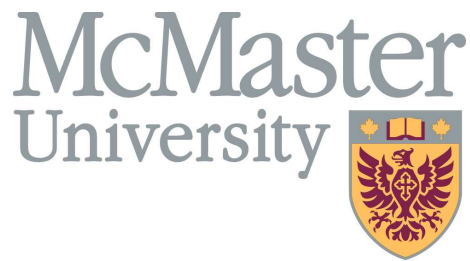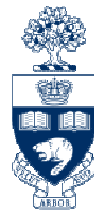

UNIVERSITY OF  
**TORONTO**

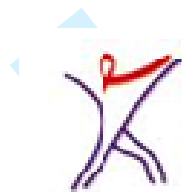

Canadian Working Group on HIV and Rehabilitation

Groupe de travail canadien sur le VIH et la réinsertion sociale

# Evidence-Informed Recommendations in Rehabilitation for Older Adults Living HIV

June 2013

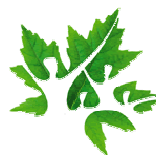

**CIHR IRSC**  
Canadian Institutes of Health Research | Instituts de recherche en santé du Canada

## Evidence-Informed Recommendations Team

Patricia Solomon, McMaster University  
 Kelly O'Brien, University of Toronto  
 Joy MacDermid, McMaster University  
 Barry Trentham, University of Toronto  
 Larry Baxter, Canadian Working Group on HIV and Rehabilitation (CWGHR)  
 Alan Casey, University of Manitoba  
 William Chegwiddden, Barts and the London NHS Trust;  
 Duncan MacLachlan, AIDS Committee of Toronto, Universities Without Walls, OHTN  
 Greg Robinson, Canadian Working Group on HIV and Rehabilitation (CWGHR)  
 Todd Tran, Community Care Access Centre, Toronto  
 Anne-Marie Tynan, St. Michael's Hospital, Toronto, Ontario  
 Janet Wu, St. Michael's Hospital, Toronto, Ontario  
 Elisse Zack, Canadian Working Group on HIV and Rehabilitation (CWGHR)

## Acknowledgements

This research was funded by a Canadian Institutes of Health Research (CIHR) Knowledge Synthesis grant (Fund # 108046). Kelly O'Brien was funded by a Fellowship from the CIHR and a Michael DeGroot Postdoctoral Fellowship (McMaster University).

We gratefully acknowledge Elizabeth Uleryk (Hospital for Sick Children) for her role in the search strategy; Ken King (Canadian Working Group on HIV and Rehabilitation) and Sheila Thomas (St. Michael's Hospital) for their role as knowledge users in earlier phases of this work; Jenn Jimmo for her role in data extraction, Nicole Gervais for her involvement in the implementation of the endorsement survey, and Nkem Iku for her involvement in the literature review, endorsement survey summary, and Additional File 2. We also thank David Vance and Debra Henninger, authors of included evidence who graciously provided additional information for this synthesis.

We acknowledge the following individuals for their involvement in the endorsement phase of the recommendations development: Colleen Price, Glyn Townson (Canadian Working Group on HIV and Rehabilitation), Rob Alexander (HIVER Consulting), Charles Furlotte (Hamilton Health Sciences Centre, McMaster University), Dawn James (Nine Circles Community Health Centre), Francisco Ibáñez-Carrasco (Ontario HIV Treatment Network), Gordon Arbess (St. Michael's Hospital), Bani Ahuja (Occupational Therapist), Michael Hamilton, Evan Collins (Department of Psychiatry, University of Toronto), and Murray Jose (Toronto People With AIDS Foundation).

### Citation

These recommendations should be cited as the following: O'Brien KK, Solomon P, Trentham B, MacLachlan D, MacDermid J, Tynan AM, Baxter L, Casey A, Chegwiddden W, Robinson G, Tran T, Wu J, Zack E. *Evidence-informed recommendations in rehabilitation for older adults living with HIV*. 2013.

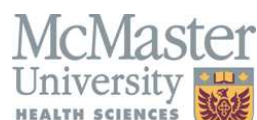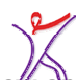

Canadian Working Group on HIV and Rehabilitation  
 Groupe de travail canadien sur le VIH et la réinsertion sociale

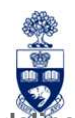

UNIVERSITY OF  
 TORONTO

For peer review only - <http://bmjopen.bmj.com/site/about/guidelines.xhtml>

## Evidence-Informed Recommendations in Rehabilitation for Older Adults Living HIV

# Table of Contents

|                                                                             |       |
|-----------------------------------------------------------------------------|-------|
| Executive Summary                                                           | 4-5   |
| Overarching Summary Recommendations                                         | 6-7   |
| Specific recommendations on rehabilitation for older adults living with HIV | 8-53  |
| Stream A - Recommendations Derived from Evidence Specific to Rehabilitation | 9-18  |
| A) Preparedness of Rehabilitation Professionals                             | 9     |
| B) Approaches to rehabilitation                                             | 10-13 |
| C) Extrinsic Factors to consider                                            | 14-15 |
| D) Intrinsic Factors to consider                                            | 16    |
| E) Rehabilitation Approaches                                                | 17    |
| F) Rehabilitation Interventions                                             | 18    |
| Stream B - Recommendations for Rehabilitation Interventions                 | 19-56 |
| A) Older Adults Living with HIV                                             | 21-24 |
| B) HIV/AIDS                                                                 | 25    |
| C) Bone and Joint Disorders                                                 | 26-29 |
| D) Cancer                                                                   | 30-33 |
| E) Stroke                                                                   | 34-40 |
| F) Cardiovascular Disease (CVD)                                             | 41-46 |
| G) Mental Health Challenges                                                 | 47-49 |
| H) Cognitive Impairments                                                    | 50-52 |
| I) Chronic Obstructive Pulmonary Disease (COPD)                             | 53-54 |
| J) Diabetes                                                                 | 55-56 |
| Figure 1: Classification of Evidence Informed Recommendations               | 57    |
| References (Background)                                                     | 58-61 |
| References from which Recommendations were derived                          | 62-74 |

## Executive Summary

Adults aging with HIV are living with the physical, social and psychological consequences of HIV disease, long term treatment, and comorbidities associated with aging. Rehabilitation including occupational therapy, physical therapy and speech-language pathology, can assist in managing the health related challenges or disability associated with HIV and aging.

Our aim was to develop clinical evidence-informed recommendations on rehabilitation for older adults living with HIV.

We conducted a knowledge synthesis, combining research evidence specific to HIV, rehabilitation and aging, with evidence on rehabilitation interventions for common comorbidities experienced by older adults with HIV. We searched for and included: highly relevant HIV-specific research addressing rehabilitation and aging (Stream A) and high-quality evidence (systematic reviews and meta-analyses) on the effectiveness of rehabilitation interventions for comorbidities commonly experienced by older adults aging with HIV (specifically bone and joint disorders, cancer, cardiovascular disease, mental health, neurocognitive decline, cardiopulmonary disease, diabetes) (Stream B). We extracted and synthesized relevant data from included studies to draft evidence-informed recommendations on rehabilitation for older adults aging with HIV. Draft specific recommendations were refined based on people living with HIV (PLHIV) and clinician's values and preferences, reviewed by an inter professional team for GRADE (quality) rating and revision, and then circulated to a new group of PLHIV and clinicians for external endorsement and final refinement. We then consolidated the detailed specific recommendations into overarching recommendations to broadly guide rehabilitation for older adults with HIV.

This synthesis yielded eight overarching and 52 specific recommendations. Thirty-six specific recommendations were derived from 108 moderate or high level research evidence articles (meta-analyses and systematic reviews) that described the effectiveness of rehabilitation interventions for adults living with health conditions that may be experienced by older adults with HIV. Recommendations address specific rehabilitation interventions across eight health conditions experienced by older adults with HIV: bone and joint disorders, cancer, stroke, cardiovascular disease, mental health issues, cognitive impairments, chronic obstructive pulmonary disease, and diabetes. Sixteen specific recommendations were derived from 42 research evidence articles specific to rehabilitation for older adults with HIV. The quality of evidence from which these recommendations were derived was either low or very low, consisting primarily of narrative reviews or descriptive studies with small sample sizes. These recommendations address approaches to rehabilitation assessment and interventions, and contextual factors to consider with rehabilitation of older adults living with HIV.

Overall, we established eight overarching and 52 specific evidence-informed recommendations from a combination of low level evidence specific to HIV, aging and rehabilitation, and high level research evidence describing the effectiveness of rehabilitation interventions for comorbidities that may be experienced by older adults with HIV. PLHIV and clinician values and preferences were integral in developing these recommendations. These evidence-informed recommendations

1  
 2 provide a comprehensive guide for rehabilitation with older adults with HIV and those who may  
 3 present with comorbidities.  
 4

5  
 6 **How are the Recommendations Presented in this Document?**

7  
 8 The evidence-informed recommendations on rehabilitation for older adults living with HIV are  
 9 presented in the form of overarching and specific detailed recommendations. Specific  
 10 recommendations are presented in two streams that represent the two different bodies of  
 11 research evidence from which the recommendations were derived.  
 12

13  
 14 ***Specific Recommendations***

15  
 16 Results for the first part of the synthesis (Stream A) include 16 recommendations derived from 42  
 17 research evidence articles specific to rehabilitation for older adults living with HIV. The level of  
 18 evidence from which these recommendations were derived was either low or very low, meaning  
 19 the articles were mostly narrative review articles or descriptive studies (either qualitative or  
 20 quantitative) with small sample sizes. Even though a recommendation may be derived from low  
 21 level evidence, it still may be highly endorsed if found to make good clinical and experiential sense  
 22 from the perspective of clinicians or PLHIV.  
 23

24  
 25 Results for the second part of the synthesis (Stream B) include 36 recommendations derived from  
 26 108 moderate or high level research evidence articles (meta analyses and systematic reviews)  
 27 describing the effectiveness of rehabilitation interventions for adults living with comorbidities that  
 28 may be experienced by older adults with HIV.  
 29

30  
 31 All specific recommendations were reviewed and revised three times with the synthesis team that  
 32 includes researchers, clinicians and people living with HIV. All specific recommendations were also  
 33 circulated to 17 PLHIV and clinicians who work in HIV care for endorsement.  
 34

35  
 36 ***Overarching Recommendations***

37  
 38 To facilitate knowledge transfer and exchange, it became apparent that we needed to establish  
 39 overarching recommendations that summarized the detailed recommendations in a condensed  
 40 manner. We consolidated the 52 specific (or detailed) recommendations into eight overarching  
 41 recommendations on rehabilitation for older adults living with HIV. These recommendations  
 42 provide a broader and more general overview of the evidence synthesis.  
 43

44  
 45 **How can the Recommendations be used?**

46  
 47 We present an overview of the overarching recommendations followed by the more specific  
 48 (detailed) recommendations. Overarching recommendations may be used by any rehabilitation  
 49 professional and other health providers who may potentially work with older adults living with HIV  
 50 in their practice. Specific (or detailed) recommendations may be used by rehabilitation  
 51 professionals and other health providers working with older adults living with HIV who would like  
 52 more specific guidance on evidence-informed recommendations for interventions across specific  
 53 comorbidities.  
 54  
 55

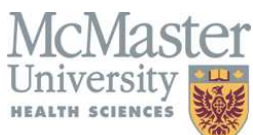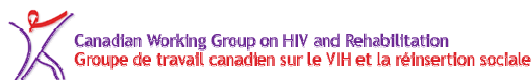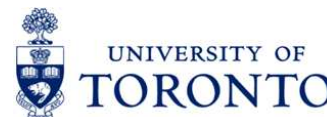



# Overarching recommendations in rehabilitation for older adults living with HIV

We offer eight overarching recommendations derived from the 52 specific recommendations that were developed from evidence specific to rehabilitation for older adults with HIV as well as high level evidence on rehabilitation interventions across comorbidities commonly experienced by older adults with HIV. The following recommendations serve as a general guide to providing rehabilitation care, treatment and support with older adults living with HIV.

For each general recommendation, where applicable, we refer to the specific (or detailed) recommendations from which they were derived.

**Summary Recommendation 1:** Rehabilitation professionals should be prepared to provide care to older adults with HIV who present with **complex comorbidities** affecting neurological, cardiorespiratory and musculoskeletal systems that may result in physical, mental and social health challenges. *(original detailed recommendation #1)*

**Summary Recommendation 2:** Rehabilitation professionals should adopt an **individualized and interprofessional approach to practice** that is sensitive to the **unique values, preferences and needs of older adults with HIV**. This approach should include comprehensive assessment and treatment of **physical, neurocognitive and mental health impairments, uncertainty (or worrying about the future), functional activity limitations, and social exclusion** while considering the intersections between **personal and social attributes** and the **broader determinants of health**. *(combination of detailed recommendations #2 – 8, 14, and 18)*

**Summary Recommendation 3: Multidisciplinary rehabilitation** including physical therapy, occupational therapy and speech-language pathology is strongly recommended across the **continuum of care** (acute, rehabilitation and community-based care) for older adults with HIV to address the multi-dimensional and episodic nature of disability attributed to HIV and its comorbidities such as bone and joint disorders, cancer, stroke, cardiovascular disease, mental health, cognitive impairment, chronic obstructive pulmonary disease (COPD) and diabetes. *(combination of detailed recommendations #14, 18, 20 and 23)*

**Summary Recommendation 4:** Rehabilitation professionals should consider the role of **extrinsic contextual factors** such as stigma and ageism, HIV disclosure, and emotional and practical social supports on the health and well-being of older adults living with HIV. *(combination of detailed recommendations #9-11)*



1  
2  
3 **Summary Recommendation 5:** Rehabilitation professionals should consider the role of **intrinsic**  
4 **contextual factors** such as self-management and spirituality on the health and well-being of older adults  
5 living with HIV. (*combination of detailed recommendations #12-13*).

6  
7  
8 **Summary Recommendation 6:** A **combination of aerobic and resistive exercise** may be recommended for  
9 older adults living with HIV who are medically stable and living with comorbidities including bone and joint  
10 disorders, cancer, stroke, cardiovascular disease, stroke, mental health, cognitive impairment, chronic  
11 obstructive pulmonary disease (COPD), and diabetes. The frequency, intensity, time and type of exercise  
12 should be individually tailored to the specific goals and capacity of the individual and the specific co-  
13 morbidity. (*combination of detailed recommendations on exercise across all comorbidities*).

14  
15  
16  
17 **Summary Recommendation 7: Cognitive rehabilitation interventions** (e.g. cognitive training, cognitive  
18 stimulation, cognitive rehabilitation) may be recommended for older adults living with HIV with mild  
19 cognitive impairment, and stroke. Inconclusive or insufficient evidence exists to support the use of **cognitive**  
20 **behavioural therapy** with older adults with HIV with **depression**. While cognitive rehabilitation does not  
21 appear harmful, weak evidence exists to support the use of cognitive-specific interventions to improve  
22 spatial neglect, disability, memory, and functional status for older adults who experience stroke.  
23 Rehabilitation professionals are encouraged to refer to specific clinical practice guidelines for each health  
24 condition to determine the effects of different cognitive interventions for older adults with HIV living with  
25 comorbidity. (*combination of detailed recommendations #29, 44, 46*)

26  
27  
28  
29  
30  
31 **Summary Recommendation 8:** In the absence of high level evidence on rehabilitation interventions for  
32 older adults living with HIV and comorbidities, rehabilitation professionals should refer to **existing clinical**  
33 **practice guidelines, systematic reviews, meta-analyses, and other forms of high level evidence for**  
34 **recommendations on interventions for a specific comorbidity**. These recommendations should be applied  
35 using an individualized approach incorporating the unique values, preferences, goals and needs of the  
36 individual.  
37  
38  
39  
40  
41  
42  
43  
44

# Specific recommendations in rehabilitation for older adults living with HIV

## Stream A - Recommendations Derived from Evidence Specific to Rehabilitation for Older Adults with HIV (HIV, Aging and Rehabilitation)

The following recommendations specific to HIV, rehabilitation and older adults serve as the contextual backdrop to providing rehabilitation care, treatment and support with older adults living with HIV.

We offer **16 recommendations** derived from evidence specific to rehabilitation for older adults with HIV combined with PLHIV and clinician values and preferences for clinicians to consider when working with older adults living with HIV. We include the level of evidence and citations from which each recommendation was derived. Some of the recommendations have additional explanatory notes to further explain the context and PLHIV and clinician values.

The recommendations are organized into the following six categories:

- A)** Preparedness of rehabilitation professionals;
- B)** Approaches to rehabilitation assessment and treatment of older adults living with HIV;
- C)** Extrinsic factors to consider with rehabilitation of older adults living with HIV;
- D)** Intrinsic factors to consider with rehabilitation of older adults living with HIV;
- E)** Rehabilitation approaches; and
- F)** Rehabilitation interventions.

Category  
A

Preparedness of Rehabilitation Professionals

**Recommendation 1:** Rehabilitation professionals should be prepared to provide care to older adults with HIV who present with **complex comorbidities** affecting neurological, cardiorespiratory and musculoskeletal systems that may result in physical, mental and social health challenges.

**Level of Evidence:** Low

**References**

Grov C, Golub SA, Parsons JT, Brennan M & Karpiak SE. Loneliness and HIV-related stigma explain depression among older HIV-positive adults. *AIDS Care - Psychological and Socio-Medical Aspects of AIDS/HIV*. 2010; 22(5): 630-639.

Vance DE, Moneyham L, Fordham P & Struzick TC. A model of suicidal ideation in adults aging with HIV. *JANAC: Journal of the Association of Nurses in AIDS Care*. 2008; 19(5): 375-384.

Vance D E. Self-rated emotional health in adults with and without HIV. *Psychological Reports*. 2006; 98(1): 106-108.

Pitts M, Grierson J & Misson S. Growing older with HIV: a study of health, social and economic circumstances for people Living with HIV in Australia over the age of 50 years. *AIDS Patient Care & Stds*. 2005; 19(7): 460-465.

Heckman TG, Heckman BD, Kochman S, Sikkema KJ, Suhr J & Goodkin K. Psychological symptoms among persons 50 years of age and older living with HIV disease. *Aging & Mental Health*. 2002; 6(2): 121-128.

Heckman TG, Kochman A & Sikkema KJ. Depressive symptoms in older adults living with HIV disease: Application of the Chronic Illness Quality of Life Model. *Journal of Mental Health and Aging*. 2002; 8(4): 267-279.

Kalichman SC, Heckman T, Kochman A, Sikkema K & Bergholte J. Depression and thoughts of suicide among middle-aged and older persons living with HIV-AIDS. *Psychiatric Services*. 2000; 51(7): 903-907.

Heckman TG, Kochman A, Sikkema KJ & Kalichman SC. Depressive symptomatology, daily stressors, and ways of coping among middle-age and older adults living with HIV disease. *Journal of Mental Health and Aging*. 1999; 5(4): 311-322

Gutheil IA & Chichin ER. AIDS, older people, and social work. *Health & Social Work*. 1991; 16(4): 237-244.

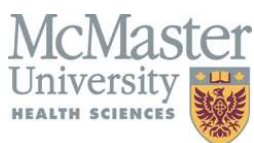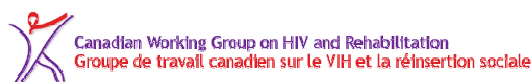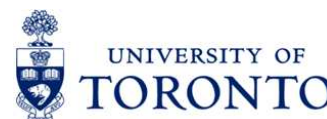

**Category  
B****Approaches to rehabilitation assessment and treatment of older adults with HIV**

**Recommendation 2:** Rehabilitation professionals should adopt an individualized approach to assessment and treatment of older adults living with HIV to fully understand the **unique and complex needs of older adults with HIV**. This approach should consider the intersections between **personal and social attributes** (race, gender, sexual orientation, ethnocultural background and socioeconomic status) and the **broader determinants of health** (housing, access to health care, poverty, racism, financial supports, income support, education, work and parenting roles).

**Explanatory Notes:** Rehabilitation professionals should consider the uniqueness of HIV care provision and the need to be flexible in their approach working with older adults with HIV.

Evidence provides information about how personal attributes of older adults living with HIV including age, sexual orientation, gender, race and comorbidities (or concurrent health conditions) may further increase the complexity of HIV and aging. Consideration of the broader determinants of health within the context of the complex personal attributes are required for considering the unique needs of older adults with HIV to enhance the rehabilitation process.

**Level of Evidence:** Low

**References**

Plach SK, Stevens PE & Keigher S. Self-care of women growing older with HIV and/or AIDS. *Western Journal of Nursing Research*. 2005; 27(5): 534-553.

Emler CA. HIV/AIDS and Aging: A Diverse Population of Vulnerable Older Adults. *Journal of Human Behavior in the Social Environment*. 2004; 9(4): 45-63.

Keigher SM, Stevens PE & Plach SK. Midlife women with HIV: health, social, and economic factors shaping their futures. *Journal of HIV/AIDS & Social Services*. 2004; 3(1): 43-58.

Emler CA & Farkas KJ. A descriptive analysis of older adults with HIV/AIDS in California. *Health & Social Work*. 2001; 26(4): 226-234.

Heckman TG, Kochman A, Sikkema KJ, Kalichman SC, Masten J & Goodkin K. Late middle-aged and older men living with HIV/AIDS: race differences in coping, social support, and psychological distress. *Journal of the National Medical Association*. 2000; 92(9): 436-444.

1  
2  
3  
4  
5  
6  
7  
8  
9  
10  
11  
12  
13  
14  
15  
16  
17  
18  
19  
20  
21  
22  
23  
24  
25  
26  
27  
28  
29  
30  
31  
32  
33  
34  
35  
36  
37  
38  
39  
40  
41  
42  
43  
44  
45  
46  
47  
48  
49  
50  
51  
52  
53  
54  
55  
56  
57  
58  
59  
60

## B.1) Physical and Mental Health Assessment

**Recommendation 3:** Rehabilitation professionals should consider assessing a **diversity of physical and mental health outcomes during assessment**, which include but are not limited to, disability, quality of life, stress, coping, anxiety and depression, retirement and financial issues, sexual and familial relationships, loneliness and social networks, cognition, and daily function.

**Level of Evidence:** Very low

### References

Senior K. Growing old with HIV. *The Lancet Infectious Diseases*. 2005; 5(12): 739.

## B.2) Physical health (aerobic capacity)

**Recommendation 4:** Rehabilitation professionals should assess both **physical impairment and functional activity** with older adults living with HIV (such as limitations in aerobic capacity).

**Level of Evidence:** Very low

### References

Oursler KK, Katzel LI, Smith BA, Scott WB, Russ DW & Sorkin JD. Prediction of cardiorespiratory fitness in older men infected with the human immunodeficiency virus: clinical factors and value of the six-minute walk distance. *Journal of the American Geriatrics Society*. 2009; 57(11): 2055-2061.

Oursler KK, Sorkin JD, Smith BA & Katzel LI. Reduced aerobic capacity and physical functioning in older HIV infected men. *AIDS Research & Human Retroviruses*. 2006; 22(11): 1113-1121.

## B.3 - Mental Health

**Recommendation 5:** Rehabilitation professionals should incorporate **mental health assessment and treatment** into the care of older adults with HIV as they are at risk of experiencing low mood, anxiety, depression, and suicide ideation.

**Explanatory Notes:** Rehabilitation professionals need to be aware of stressors that impact overall health, quality of life, coping, the ability to carry out daily activities, and social inclusion. Mental health interventions that enhance the coping abilities of older adults with HIV, especially those with elevated levels of psychological distress, are urgently needed. Those who are aging with HIV may be particularly vulnerable to negative affect and emotional challenges of dealing with HIV.

**Level of Evidence:** Low

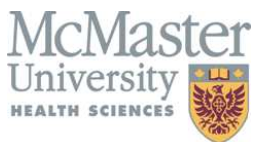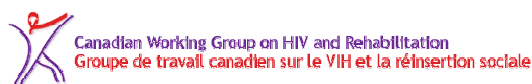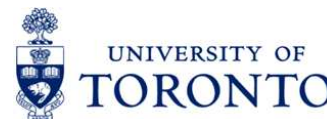

## References

Grov C, Golub SA, Parsons JT, Brennan M & Karpiak SE. Loneliness and HIV-related stigma explain depression among older HIV-positive adults. *AIDS Care - Psychological and Socio-Medical Aspects of AIDS/HIV*. 2010; 22(5): 630-639.

Vance DE, Moneyham L, Fordham P & Struzick TC. A model of suicidal ideation in adults aging with HIV. *JANAC: Journal of the Association of Nurses in AIDS Care*. 2008; 19(5): 375-384.

Vance DE. Self-rated emotional health in adults with and without HIV. *Psychological Reports*. 2006; 98(1): 106-108.

Heckman TG, Kochman A & Sikkema KJ. Depressive symptoms in older adults living with HIV disease: Application of the Chronic Illness Quality of Life Model. *Journal of Mental Health and Aging*. 2002; 8(4): 267-279.

Heckman TG, Heckman BD, Kochman A, Sikkema KJ, Suhr J & Goodkin K. Psychological symptoms among persons 50 years of age and older living with HIV disease. *Aging & Mental Health*. 2002; 6(2): 121-128.

Kalichman SC, Heckman T, Kochman A, Sikkema K & Bergholte J. Depression and thoughts of suicide among middle-aged and older persons living with HIV-AIDS. *Psychiatric Services*. 2000; 51(7): 903-907.

Heckman TG, Kochman A, Sikkema KJ & Kalichman SC. Depressive symptomatology, daily stressors, and ways of coping among middle-age and older adults living with HIV disease. *Journal of Mental Health and Aging*. 1999; 5(4): 311-322.

## B.4 - Neurocognitive Screening

**Recommendation 6:** Rehabilitation professionals should conduct regular **neurocognitive screening** with older adults living with HIV, and where indicated, conduct complete assessments to identify early signs of HIV-associated executive functioning deficits (e.g. ability to keep appointments, adhere to medication regimens, and follow-up on recommendations) and interventions to effectively prevent, reduce or compensate for cognitive impairments.

**Explanatory Notes:** Early and ongoing assessment of neurocognition among older adults living with HIV may promote early rehabilitation interventions helpful for improving cognitive function or preventing further deterioration. However, weak evidence exists for suggesting optimal methods to assess mild to moderate neurocognitive impairment and the optimal rehabilitation interventions that may address these impairments specifically to older adults living with HIV.

**Level of Evidence:** Low

## References

Vance DE & Struzick TC. Addressing risk factors of cognitive impairment in adults aging with HIV: a social work model. *Journal of Gerontological Social Work*. 2007; 49(4): 51-77.

Vance DE & Burrage Jr JW. Promoting successful cognitive aging in adults with HIV: Strategies for intervention. *Journal of Gerontological Nursing*. 2006; 32(11):34-41.



Vance DE & Burrage Jr JW. Cognitive complaints in adults aging with HIV: a pilot study. *Physical & Occupational Therapy in Geriatrics*. 2005; 24(2): 35-51.

Neundorfer MM, Camp CJ, Lee MM, Skrajner MJ, Malone ML & Carr JR. Compensating for cognitive deficits in persons aged 50 and over with HIV/AIDS, *Journal of HIV/AIDS & Social Services*. 2004; 3(1): 79-97.

Lee MM & Camp CJ. Clinical comments. Spaced retrieval: a memory intervention for HIV+ older adults. *Clinical Gerontologist*. 2001; 22(3/4): 131-135.

**B.5) Uncertainty**

**Recommendation 7:** Rehabilitation professionals should be aware of the potential impact of **uncertainty** among older adults with HIV and the psychological importance for some older adults to know the source of their symptoms (age-related versus HIV-related versus medication-related).

**Level of Evidence:** Low

**References**

Siegel K, Dean L & Schrimshaw EW. Symptom ambiguity among late-middle-aged and older adults with HIV. *Research on Aging*. 1999; 21(4): 595-618.

**B.6) Social Inclusion**

**Recommendation 8:** Rehabilitation professionals should consider the risk of **social exclusion** older adults with HIV may face in relation to race, ethnicity, gender, and sexual orientation, in addition to their HIV status, in their assessment.

**Explanatory Notes:** Older adults living with HIV are at risk of social exclusion, dependent on personal and environmental factors.

**Level of Evidence:** Low

**References**

Emler CA. An examination of the social networks and social isolation in older and younger adults living with HIV/AIDS. *Health & Social Work*. 2006; 31(4): 299-308.

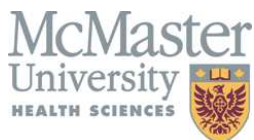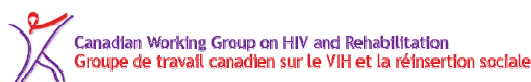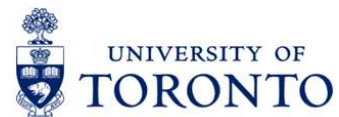

# Category C

## Extrinsic Factors to consider with rehabilitation of older adults living with HIV

### C.1) Ageism and Stigma

**Recommendation 9:** Rehabilitation professionals should be knowledgeable of **ageism** as an added layer of stigma that may increase existing HIV stigma and homophobia experienced by older adults with HIV.

**Level of Evidence:** Low

#### References

Older HIV patients deal with the double stigma of having the disease and being old. Big worry: 'Will I get to see grandkids if I tell?'. AIDS Alert. 2007; 22(2): 16-17.

Poindexter CC. Six champions speak about being over 50 and living with HIV. Journal of HIV/AIDS & Social Services. 2004; 3(1): 99-117.

### C.2) HIV Disclosure

**Recommendation 10:** Rehabilitation professionals should understand the implications of **HIV disclosure** among older adults with HIV, be respectful of individualized choice surrounding disclosure, the potential social, legal and financial implications of disclosure, and be prepared to discuss ways to ensure clients obtain the necessary supports surrounding disclosure.

**Explanatory Notes:** Issues surrounding disclosure will be increasingly important as older adults with HIV enter long term care environments with increasing complexities with stigma having implications for disclosure.

**Level of Evidence:** Low

#### References

Poindexter C & Shippy RA. Networks of older New Yorkers with HIV: fragility, resilience, and transformation. AIDS Patient Care & Stds. 2008; 22(9): 723-733.

Shippy RA. Taking care of each other. GMHC treatment issues : the Gay Men's Health Crisis newsletter of experimental AIDS therapies. 2007; 21(2): 7-8.

Schrimshaw EW & Siegel K. Perceived barriers to social support from family and friends among older adults with HIV/AIDS. Journal of Health Psychology. 2003; 8(6): 738-752.



### C.3) Social Support

**Recommendation 11a:** Rehabilitation professionals should be knowledgeable about the importance of social relationships and the need for **emotional and practical social support** to maximize physical, mental and psychological well-being for older adults with HIV.

**Recommendation 11b:** Rehabilitation professionals should recognize the **emotional and practical barriers to social support** that may exist within 'family' and 'support networks' among older adults with HIV.

**Recommendation 11c:** Rehabilitation professionals should recognize the **supportive obligations** that older adults with HIV may have to family, friends and fellow people with HIV and how this might impact their overall health.

**Explanatory Notes:** There may be a variable composition of 'family' and 'support networks' among older adults with HIV as HIV positive older adults may form essential networks with others living with HIV for support and grief. These networks may be simultaneously vulnerable and durable.

**Level of Evidence:** Low

#### References

Mavandadi S, Zanjani F, Ten Have TR & Oslin DW. Psychological well-being among individuals aging with HIV: the value of social relationships. *Journal of Acquired Immune Deficiency Syndromes: JAIDS*. 2009; 51(1): 91-98.

Poindexter C & Shippy RA. Networks of older New Yorkers with HIV: fragility, resilience, and transformation. *AIDS Patient Care & Stds*. 2008; 22(9): 723-733.

Shippy RA. Taking care of each other. *GMHC treatment issues : the Gay Men's Health Crisis newsletter of experimental AIDS therapies*. 2007; 21(2): 7-8.

Shippy R & Karpiak SE. Perceptions of Support Among Older Adults With HIV. *Research on Aging*. 2005; 27(3): 290-306.

Chesney MA, Chambers DB, Taylor JM & Johnson LM. Social support, distress, and well-being in older men living with HIV infection. *Journal of Acquired Immune Deficiency Syndromes: JAIDS*. 2003; 33 Suppl 2: S185-193.

Schrimshaw EW & Siegel K. Perceived barriers to social support from family and friends among older adults with HIV/AIDS. *Journal of Health Psychology*. 2003; 8(6): 738-752.

Malone MA. HIV-positive women over fifty: how they cope. *AIDS Patient Care & Stds*. 1998; 12(8): 639-643.

## Category D

# Intrinsic Factors to consider with rehabilitation of older adults living with HIV

## D.1) Self-Management

**Recommendation 12:** Rehabilitation professionals should consider the role of **self-management strategies** to promote health and wellness among older adults living with HIV.

**Level of Evidence:** Low

### References

Plach SK, Stevens PE & Sharon K. Self-care of women growing older with HIV and/or AIDS. *Western Journal of Nursing Research*. 2005; 27(5): 534-553.

Heckman TG, Kochman A, Sikkema KJ, Kalichman SC, Masten J & Goodkin K. Late middle-aged and older men living with HIV/AIDS: race differences in coping, social support, and psychological distress. *Journal of the National Medical Association*. 2000; 92(9): 436-444.

## D.2) Spirituality

**Recommendation 13:** Rehabilitation professionals may consider the importance and role of **spirituality** in the health of older adults with HIV depending on the individual.

**Explanatory Notes:** The importance of spirituality among older adults living with HIV care may vary based on religious and ethnocultural background and may be complex, balanced with potential benefits of social support and challenges to social inclusion.

**Level of Evidence:** Very low

### References

Hines ME. Commentary on "biopsychosocial benefits of spirituality in adults aging with HIV: implications for nursing practice and research". *New challenges for providing spiritual care in aging patients with HIV*. *Journal of Holistic Nursing*. 2008; 26(2): 126-127.

Ackerman, M. Religiosity and Biopsychosocial Outcomes in HIV: A SEM Comparison of Gender, Race, and Sexual Orientation. *Southern Online Journal of Nursing Research*. 2008; 8(4) at: [http://www.resourcenter.net/images/snrs/files/sojnr\\_articles2/Vol08Num04A.html#Ackerman.\(2008\).](http://www.resourcenter.net/images/snrs/files/sojnr_articles2/Vol08Num04A.html#Ackerman.(2008).) "2008 SNRS abstracts -- A." *Southern Online Journal of Nursing Research* 8(4): 1-1.

Vance DE & Woodley RA Strengths and distress in adults who are aging with HIV: a pilot study. *Psychological Reports*. 2005; 96(2): 383-386.

Vance DE & Robinson FP. Reconciling successful aging with HIV: a biopsychosocial overview. *Journal of HIV/AIDS & Social Services*. 2004; 3(1): 59-78.

Category  
E

Rehabilitation Approaches

E.1) Interprofessional Practice

**Recommendation 14:** Rehabilitation professionals should use an **interprofessional approach to practice** that is **sensitive** to the unique and individualized values and preferences of older adults with HIV while considering issues of culture, stigma and discrimination. Specifically rehabilitation professionals should **communicate** information surrounding care, treatment and education in a way that is **tailored to the specific needs** of older adults with HIV to optimize physical and mental health and well-being.

**Level of Evidence:** Low to very low

**References**

Shippy RA & Karpiak SE. The aging HIV/AIDS population: fragile social networks. *Aging & Mental Health*. 2005; 9(3): 246-254.

Hillman JL & Stricker G. Some issues in the assessment of HIV among older adult patients. *Psychotherapy*. 1998; 35 (4): 483-489.

E.2) Complementary and Alternative Medicine

**Recommendation 15:** Rehabilitation professionals should inquire about the nature and extent to which older adults with HIV use **complementary and alternative medicine (CAM)** and consider the potential benefits and side effects of CAM interventions.

**Explanatory Notes;** Lifestyle strategies might include use of complementary and alternative medicines and therapies. Given the high number of older adults with HIV taking complementary and alternative medicine (CAM) in combination or in lieu of antiretrovirals, it is important for rehabilitation professionals to consider the use of CAM among older adults living with HIV.

**Level of Evidence:** Low

**References**

Wutoh AK, Brown CM, Kumoji EK, Daftary MS, Jones T, Barnes NA & Powell NJ. Antiretroviral adherence and use of alternative therapies among older HIV-infected adults. *Journal of the National Medical Association*. 2001; 93(7-8): 243-250.

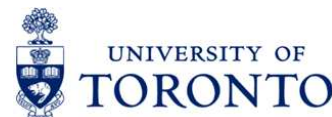

# Category F

## Rehabilitation Interventions

**Recommendation 16: Exercise (specifically progressive resistive exercise) may be recommended** for associated improvements in strength, body composition, and physical fitness in older adults living with HIV. Specifically, resistive exercise may be considered for use among older adults who are frail to increase muscle strength and mitigate wasting.

**Explanatory Notes:** A paucity of rehabilitation intervention evidence existed specific to older adults living with HIV. Exercise was one intervention where although there was low level evidence comprised of a prospective single group study design, this recommendation was highly GRADED by the synthesis team. Evidence on neurocognitive interventions such as space retrieval and teleconferencing support interventions also existed suggesting that group cognitive interventions focused on increasing adaptive coping and social support may help to improve the health-related quality of life of older adults living with HIV and that teleconferencing support or coping group interventions may help to improve psychological well-being, however these too were low levels of evidence and these interventions were not highly GRADED by the synthesis team. Concerns were raised in highlighting these interventions over other interventions used in clinical practice only because there was some form of evidence published in this area. As a result, we refrained from developing specific recommendations for rehabilitation interventions that did not have evidence and were not strongly graded by the team.

**Level of Evidence:** Low

### References

de Souza PML, Filho WJ, Santarem JM, da Silva AR, Li HY & Burattini MN. Progressive resistance training on elderly HIV+ patients: Does it work? *American Journal of Infectious Diseases*. 2008; 4(4): 215-219.

Evans WJ, Roubenoff R & Shevitz A. Exercise and the treatment of wasting: aging and human immunodeficiency virus infection. *Seminars in Oncology*. 1998; 25(2 Suppl 6): 112-122.

### Additional References (interventions not included in the specific recommendations)

Heckman TG, Barcikowski R, Ogles B, Suhr J, Carlson B, Holroyd K & Garske J. A Telephone-Delivered Coping Improvement Group Intervention for Middle-Aged and Older Adults Living With HIV/AIDS. *Annals of Behavioral Medicine*. 2006; 32(1): 27-38.

Nokes KM, Chew L & Altman C. Using a telephone support group for HIV-positive persons aged 50+ to increase social support and health-related knowledge. *AIDS Patient Care & Stds*. 2003; 17(7): 345-351.

Heckman TG, Kochman A, Sikkema KJ, Kalichman SC, Masten J, Bergholte J & Catz S. A pilot coping improvement intervention for late middle-aged and older adults living with HIV/AIDS in the USA. *AIDS Care*. 2001; 13(1): 129-139.

Lee MM & Camp CJ. Clinical comments. Spaced retrieval: a memory intervention for HIV+ older adults. *Clinical Gerontologist*. 2001; 22(3/4): 131-135.

# Specific recommendations in rehabilitation for older adults living with HIV

## Stream B- Recommendations for Rehabilitation Interventions for Older Adults with HIV who may experience Common Comorbidities

The following recommendations serve as a guide for rehabilitation interventions with older adults living with HIV who may be living with common comorbidities. No guidelines exist on rehabilitation interventions specific to older adults with HIV and comorbidities. While high level evidence exists for exercise and HIV, these systematic reviews were not specifically focused with older adults with HIV.

For Stream B, we included systematic reviews or meta-analyses so the rating of the evidence was either high (systematic reviews published in the Cochrane Library) or moderate (other systematic reviews or meta-analyses not published in the Cochrane Library). However, the wording of our recommendation depended on how well or to what extent we could make the leap from the condition-specific evidence to a recommendation for rehabilitation specific to older adults living with HIV and these conditions. Hence, PLHIV and clinician values and preferences were integral to determining the strength of the recommendation, based on whether the recommendation made sense clinically and experientially for older adults living with HIV and that the intervention posed minimal risk or harm to older adults living with HIV.

We offer **36 recommendations** that include specific considerations when applying rehabilitation interventions for adults living with HIV. We then indicate the level of evidence and citations of evidence (references) from which the recommendations were derived. Given this synthesis was not specific to older adults, we also provide the age of participants represented in the evidence, to help clinicians determine the applicability of the recommendation to older adults with HIV.

The recommendations are presented based on interventions across 10 categories specific to:

- A)** Older adults;
- B)** HIV/AIDS, and eight comorbidities that may be experienced by older adults with HIV;
- C)** Bone and joint disorders;
- D)** Cancer;
- E)** Stroke;
- F)** Cardiovascular disease;
- G)** Mental health challenges;
- H)** Cognitive impairments;
- I)** Chronic Obstructive Pulmonary Disease (COPD); and
- J)** Diabetes.

1  
2  
3  
4  
5  
6  
7  
8  
9  
10  
11  
12  
13  
14  
15  
16  
17  
18  
19  
20  
21  
22  
23  
24  
25  
26  
27  
28  
29  
30  
31  
32  
33  
34  
35  
36  
37  
38  
39  
40  
41  
42  
43  
44  
45  
46  
47  
48  
49  
50  
51  
52  
53  
54  
55  
56  
57  
58  
59  
60

For each comorbidity, we provide a background on the prevalence and incidence of the condition among people living with HIV, and the nature of disability that may be experienced by adults living with HIV and these comorbidities.

For peer review only

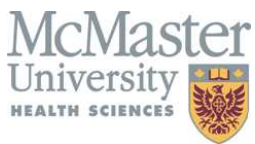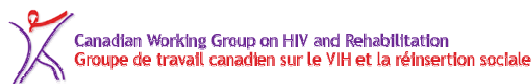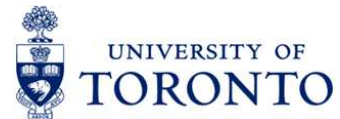



Category

A

Older Adults Living with HIV

The prevalence of older adults with HIV in Canada and the United States is increasing. As of 2008, approximately 10% of Canadians living with HIV were older adults (50 years or older). In Canada, the rate of new HIV positive reports for older adults increased from 11% in 1999 to 15% in 2008 (1).

In 2005, the prevalence of older adults living with HIV, 50 years and older in the United States was 24%. Older adults accounted for 15% of all new HIV cases in 2005 (2)

Among Canadians living with HIV 50 years and older in 2005, the majority was men (86%), white (74%), 13% were Aboriginal and 6% were of African descent (1). Newly reported HIV positive cases for women ages 50 years and older increased from 11% between 1985-1996 to approximately 16% between 1997- 2008 (1).

Among adults living with HIV, 50 years and older, 18% reported having one comorbidity, 28% reported having two, and 54% reported having three or more (3). Over 50% of older adults living with HIV reported taking antiretroviral therapy (3). Long-term antiretroviral therapy may be associated with several metabolic and anatomic complications, including abnormal or degenerative conditions of the body’s adipose tissue (lipodystrophy), insulin resistance, diabetes, kidney disease and an abnormal amount of lipids in the blood (dyslipidemia) (3-6).

**Disability Experienced by Older Adults with HIV**

Challenges faced by adults living with HIV, 50 years and over may include low bone mass density (which increases the risk of osteoporotic fractures), fatigue, weight loss, night sweats and diminished appetite (4, 7-10). Comorbidities such as cardiovascular disease, osteoporosis, decline of renal function, liver disease and dementia are more common among older adults living with HIV and can complicate the disease process and management (4, 11, 12).

We present three recommendations for exercise and occupational therapy for older adults living with HIV.

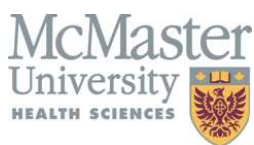

## A.1 – Exercise

**Recommendation 17: Regular forms of exercise** including (strength/resistance training, aerobic/cardiovascular endurance training, and balance/stability training) may be strongly recommended for older adults with HIV who are medically stable to reduce fall rates, improve functional and physical performance, improve cardiopulmonary fitness, reduce depressive symptoms, and improve mood and quality of life.

Specifically:

**Recommendation 17a: Exercise-specific interventions** involving **gait, balance, co-ordination and functional exercises, and muscle strengthening** is strongly recommended for its beneficial effect on balance.

**Recommendation 17b: Aerobic exercise** is strongly recommended to improve cardiorespiratory fitness and may also be beneficial for cognitive function specifically improvements in motor function, cognitive speed, auditory and visual attention.

**Recommendation 17c: Progressive resistive exercise** two to three times a week may be recommended to improve physical function. Clients should be monitored as evidence suggests adverse effects might occur in older people at higher risk of injury (i.e. frail or recently ill older people).

**Recommendation 17d: Home-based exercise programs** may be recommended for those who are medically stable as evidence suggests home-based exercise may be just as beneficial to centre-based exercise (rehabilitation) programs.

**Level of Evidence:** High (combination of Cochrane systematic reviews and meta-analyses - not Cochrane)

**Age of Participants in Research Evidence:** >50 years (and >60 years in majority of evidence)

### References

Liu CJ & Latham NK. Progressive resistance strength training for improving physical function in older adults. *Cochrane Database of Systematic Reviews* 2009, Issue 3. Art. No.: CD002759. DOI: 10.1002/14651858.CD002759.pub2.

Angevaren M, Aufdemkampe G, Verhaar HJJ, Aleman A & Vanhees L. Physical activity and enhanced fitness to improve cognitive function in older people without known cognitive impairment. *Cochrane Database of Systematic Reviews* 2008, Issue 3. Art. No.: CD005381. DOI: 10.1002/14651858.CD005381.pub3.

Gu MO & Conn VS. Meta-analysis of the effects of exercise interventions on functional status in older adults. *Research in Nursing & Health*. 2008; 31(6): 594–603 [Published online 10 June 2008 in Wiley InterScience]. DOI: 10.1002/nur.20290.

Baker MK, Atlantis E & Fiatarone Singh MA. Multi-modal exercise programs for older adults: systematic review. *Age and Ageing*. 2007; 36(4): 375–381. DOI:10.1093/ageing/afm054.

de Morton N, Keating JL & Jeffs K. Exercise for acutely hospitalised older medical patients. *Cochrane Database of Systematic Reviews* 2007, Issue 1. Art. No.: CD005955. DOI: 10.1002/14651858.CD005955.pub2.



1  
2  
3 Howe TE, Rochester L, Jackson A, Banks PMH & Blair VA. Exercise for improving balance in older people.  
4 *Cochrane Database of Systematic Reviews* 2007, Issue 4. Art. No.: CD004963. DOI:  
5 10.1002/14651858.CD004963.pub2.  
6

7  
8 Sjosten N & Kivela SL. The effects of physical exercise on depressive symptoms among the aged: a  
9 systematic review. *International Journal of Geriatric Psychiatry*. 2006; 21(5): 410-418.  
10

11 Ashworth NL, Chad KE, Harrison EL, Reeder BA & Marshall SC. Home versus center based physical activity  
12 programs in older adults. *Cochrane Database of Systematic Reviews* 2005, Issue 1. Art.No.: CD004017. DOI:  
13 10.1002/14651858.CD004017.pub2.  
14

15 Huang G, Gibson CA, Tran ZV & Osness WH. Controlled endurance exercise training and VO2max changes in  
16 older adults: a meta-analysis. *Preventive Cardiology*. 2005; 8(4): 217-225.  
17

18  
19 Arent SM, Landers DM & Etnier JL. The effects of exercise on mood in older adults: a meta-analytic review.  
20 *Journal of Aging and Physical Activity*. 2000; 8(4):407-430.  
21

## 22 A.2 – Rehabilitation

23  
24 **Recommendation 18: Multidisciplinary forms of rehabilitation is strongly recommended**  
25 **for older adults with HIV who are hospitalized to promote earlier discharge directly home**  
26 **from hospital and reduced costs associated with hospitalization.**  
27  
28

29  
30 **Level of Evidence:** High (combination of Cochrane systematic reviews and meta-analyses - not Cochrane)  
31

32 **Age of Participants in Research Evidence:** >50 years (and >60 years in majority of evidence)  
33

### 34 References

35 Liu CJ & Latham NK. Progressive resistance strength training for improving physical function in older adults.  
36 *Cochrane Database of Systematic Reviews* 2009, Issue 3. Art. No.: CD002759. DOI:  
37 10.1002/14651858.CD002759.pub2.  
38

39 Angevaren M, Aufdemkampe G, Verhaar HJJ, Aleman A & Vanhees L. Physical activity and enhanced fitness  
40 to improve cognitive function in older people without known cognitive impairment. *Cochrane Database of*  
41 *Systematic Reviews* 2008, Issue 3. Art. No.: CD005381. DOI: 10.1002/14651858.CD005381.pub3.  
42

43 Gu MO & Conn VS. Meta-analysis of the effects of exercise interventions on functional status in older  
44 adults. *Research in Nursing & Health*, 2008, 31, 594–603. Published online 10 June 2008 in Wiley  
45 InterScience. DOI: 10.1002/nur.20290.  
46

47 Baker MK, Atlantis E & Fiatarone Singh MA. Multi-modal exercise programs for older adults: systematic  
48 review. *Age and Ageing* 2007; 36: 375–381. doi:10.1093/ageing/afm054.  
49

50 de Morton N, Keating JL & Jeffs K. Exercise for acutely hospitalised older medical patients. *Cochrane*  
51 *Database of Systematic Reviews* 2007, Issue 1. Art. No.: CD005955. DOI:  
52 10.1002/14651858.CD005955.pub2.  
53

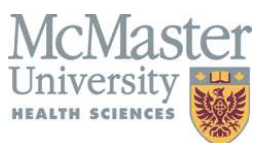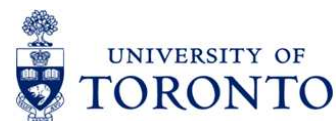

1  
2  
3 Howe TE, Rochester L, Jackson A, Banks PMH & Blair VA. Exercise for improving balance in older people.  
4 *Cochrane Database of Systematic Reviews* 2007, Issue 4. Art. No.: CD004963. DOI:  
5 10.1002/14651858.CD004963.pub2.  
6

7  
8 Sjosten N & Kivela SL. The effects of physical exercise on depressive symptoms among the aged: a  
9 systematic review. *International Journal of Geriatric Psychiatry*. 2006; 21(5): 410-418.

10  
11 Ashworth NL, Chad KE, Harrison EL, Reeder BA & Marshall SC. Home versus center based physical activity  
12 programs in older adults. *Cochrane Database of Systematic Reviews* 2005, Issue 1. Art.No.: CD004017. DOI:  
13 10.1002/14651858.CD004017.pub2.  
14

15  
16 Huang G, Gibson CA, Tran ZV & Osness WH. Controlled endurance exercise training and VO2max changes in  
17 older adults: a meta-analysis. *Preventive Cardiology*. 2005; 8(4): 217-225.  
18

19  
20 Arent S M, Landers D M & Etnier J L. The effects of exercise on mood in older adults: a meta-analytic  
21 review. *Journal of Aging and Physical Activity*. 2000; 8:407-430.  
22

### 23 A.3 – Occupational Therapy

24  
25 **Recommendation 19: Occupational therapy** may be an important component of  
26 rehabilitation for older adults living with HIV with functional impairments and is strongly  
27 recommended for elderly community dwellers, specifically for advising on adaptive  
28 devices; mobility devices; energy conservation; cognitive training; training of skills to use  
29 adaptive devices to enhance functional ability, and to enhance social participation and  
30 quality of life.  
31  
32

33 **Level of Evidence:** Moderate (systematic review but not Cochrane)

34  
35 **Age of Participants in Research Evidence:** >60 years  
36

#### 37 Reference

38  
39 Steultjens EM, Dekker J, Bouter LM, Jellema S, Bakker EB & van den Ende CH. Occupational therapy for  
40 community dwelling elderly people: a systematic review. *Age & Ageing*. 2004; 33(5): 453-460.  
41  
42  
43  
44  
45  
46  
47  
48  
49  
50  
51  
52  
53  
54  
55

1  
2  
3  
4  
5  
6  
7  
8  
9  
10  
11  
12  
13  
14  
15  
16  
17  
18  
19  
20  
21  
22  
23  
24  
25  
26  
27  
28  
29  
30  
31  
32  
33  
34  
35  
36  
37  
38  
39  
40  
41  
42  
43  
44  
45  
46  
47  
48  
49  
50  
51  
52  
53  
54  
55  
56  
57  
58  
59  
60

**Category**  
**B**

**HIV/AIDS**

We present one recommendation for exercise specific to older adults living with HIV.

**Recommendation 20: Aerobic and resistive exercise** may be recommended for at least 20 minutes at least 3 times per week for at least 5 weeks for older adults living with HIV who are medically stable with the potential to maintain or enhance outcomes of cardiopulmonary fitness, weight and body composition, strength, and quality of life.

**Explanatory Notes:** Although this recommendation was derived from high level evidence on HIV and exercise, the evidence is not specific to older adults with HIV. Clinicians are encouraged to use this recommendation in combination with the exercise recommendation #16 that was derived from lower level evidence, but specifically to older adults with HIV.

**Level of Evidence:** High (Cochrane systematic reviews)

**Age of Participants in Research Evidence:** Age range 18-66 years

**References**

O'Brien K, Nixon S, Tynan AM & Glazier R. Aerobic exercise interventions for adults living with HIV/AIDS. *Cochrane Database of Systematic Reviews* 2010, Issue 8. Art. No.: CD001796. DOI: 10.1002/14651858.CD001796.pub3.

O'Brien K, Tynan AM, Nixon S & Glazier RH. Effects of progressive resistive exercise in adults living with HIV/AIDS: systematic review and meta-analysis of randomized trials. *AIDS Care*. 2008; 20(6): 631-653. Available from: <http://dx.doi.org/10.1080/09540120701661708>.

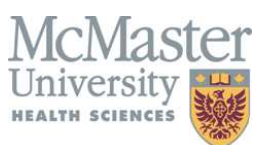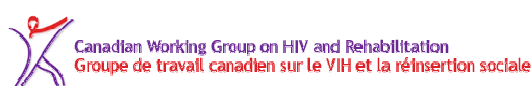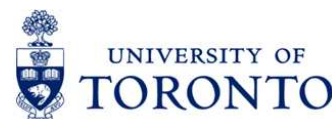

**Category**  
**C****Bone and Joint Disorders**

The prevalence of low bone mineral density (BMD) among older adults living with HIV ranges from 27%-39%; and the prevalence of osteoporosis is 15% - 16% which is 4 times greater than adults without HIV. Prevalence rates for osteopenia are 20-52% and 4% for osteonecrosis (7, 13-16).

HIV infection has been independently linked to decreased BMD among men and women (10, 13). Men ages 50 years and older in general have low BMD, but this levels of BMD are lower among older men living with HIV compared to men in the same age group living without HIV (10). The prevalence of low peak bone mass are higher among women living with HIV compared to women who are not living with HIV, younger in age, have a moderate to high body weight, no history of bone fractures and who has or is currently using estrogen (13).

Lifestyle factors among people living with HIV associated with low peak bone mass include cigarette smoking (10, 17). With an increasing prevalence of smoking among people living with HIV, the prevalence of osteoporosis may increase among this population (4, 18).

Ethnicity is a genetic factor strongly associated with BMD (13). People of African descent have higher BMD and a lower risk of developing osteoporosis compared to the rest of the population, but the presence of an HIV infection can reduce BMD and increase risk of osteoporotic fractures regardless of ethnicity (13).

Rheumatic Disorders are medical problems affecting the joints and connective tissue (19). They include spondyloarthropathic arthritis, also known as Reiter's syndrome which has a prevalence rate ranging from 5-10% among adults with HIV (19). The prevalence rate for psoriatic arthritis is 1-32% among adults living with HIV (19).

**Disability Experienced by Adults with Bone and Joint Disorders**

Challenges faced by adults living with HIV with bone and joint disorders include prolonged periods of immobility (decreased activity levels), increased bone loss, reduced weight bearing, decreased joint range-of-motion, and pain in joints and areas closest to joint (13, 16, 19).

Low BMD in the femoral neck and lumbar spine increases the risk of osteoporotic fractures for women living with HIV (13). Older men living with HIV with low BMD have increased chances of fractures and hospitalization from fracture (7, 10). Fractures can lead to activity limitations (such as decreased mobility) as well as social participation restrictions.

We present four recommendations for exercise, rehabilitation and self-management interventions for older adults living with HIV and bone and joint disorders.

**C.1 – Exercise**

**Recommendation 21a: Supervised exercise** sessions should be recommended to older adults living with HIV with knee and/or hip osteoarthritis (OA) who are medically stable to improve pain and physical function.

**Explanatory Notes:** Evidence more strongly suggests improvements with knee osteoarthritis (OA) rather than hip OA. Exercise programs that involve more than 12 directly supervised sessions may be associated with greater improvements in knee pain and physical function. While this evidence was not specific to older adults with knee or hip OA, it did include older adults with OA in the systematic review.

**Recommendation 21b: A combination of low impact exercise in the form of jogging, stair climbing and walking, combined with high-magnitude resistance training** should be recommended for older adults with HIV to preserve bone mineral density.

**Explanatory Notes:** Evidence is specific to postmenopausal women, but there is no reason that men may not benefit from these exercise interventions as well.

**Level of Evidence:** High (knee OA) to moderate (hip OA) (systematic review but not Cochrane)

**Age of Participants in Research Evidence:** >50 years

**References**

Fransen M & McConnell S. Exercise for osteoarthritis of the knee. Cochrane Database of Systematic Reviews 2008, Issue 4. Art. No.: CD004376. DOI: 10.1002/14651858.CD004376.pub2. Available from: <http://onlinelibrary.wiley.com/doi/10.1002/14651858.CD004376.pub2/pdf>

Fransen M & McConnell S, Hernandez-Molina G, Reichenbach S. Exercise for osteoarthritis of the hip. *Cochrane Database of Systematic Reviews* 2009, Issue 3. Art. No.: CD007912. DOI: 10.1002/14651858.CD007912. Available from: <http://onlinelibrary.wiley.com/doi/10.1002/14651858.CD007912/full>

Martyn-St James M & Carroll S. A meta-analysis of impact exercise on postmenopausal bone loss: The case for mixed loading exercise programmes. *Br J Sports Med.* 2009; 43(12): 898-908. Originally published online November 3, 2008. DOI: 10.1136/bjsm.2008.052704. Available from: <http://bjsportmed.com/content/43/12/898.abstract>.

**Recommendation 22: Balance and strengthening exercises** should be part of an overall exercise program to decrease falls and risk of fall-related fractures for older adults with HIV and low bone mineral density (BMD).

**Explanatory Notes:** Balance and strengthening exercises are important for overall aging and older adults but particularly for older adults with HIV who may have nutritional challenges and issues with muscle-wasting. Balance training is also particularly important for older adults with HIV who may have peripheral neuropathy resulting in balance impairments placing them at increased risk for falls.

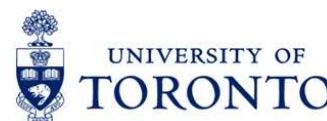



1  
2 **Level of Evidence:** Moderate (systematic review but not Cochrane)

3  
4 **Age of Participants in Research Evidence:** >50 years

5  
6  
7 **References**

8 de Kam D, Smulders E, Weerdesteyn V & Smits-Engelsman BC. Exercise interventions to reduce fall-related  
9 fractures and their risk factors in individuals with low bone density: a systematic review of randomized  
10 controlled trials. *Osteoporosis International*. 2009; 20(12): 2111-212. DOI: 10.1007/s00198-009-0938-6.

11  
12  
13 **C.2 - Rehabilitation**

14  
15 **Recommendation 23: Multidisciplinary rehabilitation teams** comprised of an  
16 occupational therapy (OT) and physical therapy (PT) across the **continuum of care** should  
17 be recommended for older adults with HIV who sustain a hip fracture. Specifically,  
18 **inpatient geriatric rehabilitation programs** are strongly recommended and may be an  
19 ideal intervention as they have the potential to reduce nursing home admission, mortality  
20 and improve functional status.  
21  
22

23 **Explanatory Notes:** Weak evidence exists on the effect of rehabilitation interventions for older adults post  
24 hip fracture on physical, psychosocial outcomes, mortality and length of stay. Limitations in the evidence  
25 are related to the large variability in interventions and outcomes assessed.  
26

27  
28 **Level of Evidence:** Moderate (systematic review but not Cochrane)

29  
30 **Age of Participants in Research Evidence:** >50 years

31  
32 **References**

33 Bachmann S, Finger C, Huss A, Egger M, Stuck AE & Clough-Gorr KM. Inpatient rehabilitation specifically  
34 designed for geriatric patients: systematic review and meta-analysis of randomised controlled trials. *BMJ*  
35 (Clinical research ed.). 2010; 340: c1718. DOI: <http://dx.doi.org/10.1136/bmj.c1718>.

36  
37  
38 Crotty M, Unroe K, Cameron ID, Miller M, Ramirez G & Couzner L. Rehabilitation interventions for  
39 improving physical and psychosocial functioning after hip fracture in older people. *Cochrane database of*  
40 *systematic reviews* 2010, DOI: 10.1002/14651858.CD007624.pub3. Available from:  
41 [http://summaries.cochrane.org/CD007624/rehabilitation-interventions-for-improving-physical-and-](http://summaries.cochrane.org/CD007624/rehabilitation-interventions-for-improving-physical-and-psychosocial-functioning-after-hip-fracture-in-older-people)  
42 [psychosocial-functioning-after-hip-fracture-in-older-people](http://summaries.cochrane.org/CD007624/rehabilitation-interventions-for-improving-physical-and-psychosocial-functioning-after-hip-fracture-in-older-people)

43  
44  
45 Chudyk AM, Jutai JW, Petrella RJ & Speechley M. Systematic Review of Hip Fracture Rehabilitation Practices  
46 in the Elderly. *Archives of Physical Medicine and Rehabilitation*. 2009; 90(2): 246-262.

47  
48 Handoll HHG, Cameron ID, Mak JCS, & Finnegan TP. Multidisciplinary rehabilitation for older people with  
49 hip fractures. *Cochrane Database of Systematic Reviews* 2009, Issue 4. Art. No.: CD007125. DOI:  
50 10.1002/14651858.CD007125.pub2. Available from:  
51 [http://summaries.cochrane.org/CD007125/multidisciplinary-rehabilitation-of-older-patients-with-hip-](http://summaries.cochrane.org/CD007125/multidisciplinary-rehabilitation-of-older-patients-with-hip-fractures)  
52 [fractures](http://summaries.cochrane.org/CD007125/multidisciplinary-rehabilitation-of-older-patients-with-hip-fractures).  
53  
54

Halbert J, Crotty M, Whitehead C, Cameron I, Kurrle S, Graham S, Handoll H, Finnegan T, Jones T, Foley A & Shanahan M. Multi-disciplinary rehabilitation after hip fracture is associated with improved outcome: A systematic review. Journal of Rehabilitation Medicine. 2007; 39(7): 507-512.

Handoll HH, Sherrington C & Parker MJ. Mobilisation strategies after hip fracture surgery in adults. Cochrane database of systematic reviews 2004, Issue 1: 1-94. DOI: 10.1002/14651858.CD001704.pub3. Available from: <http://onlinelibrary.wiley.com/doi/10.1002/14651858.CD001704.pub4/full>.

### C.3 – Self-Management Programs

**Recommendation 24: Self-management** programs may be considered as a component of a rehabilitation program to address disability and pain for older adults living with HIV and arthritis.

**Explanatory Notes:** Self-management strategies may be particularly useful in the context of HIV whereby there may be limitations in access to rehabilitation services for older adults with HIV.

**Level of Evidence:** Moderate (systematic review but not Cochrane)

**Age of Participants in Research Evidence:** Mean age 61 years

#### Reference

Warsi A, LaValley MP, Wang PS, Avorn J & Solomon DH. Arthritis self-management education programs: A meta-analysis of the effect on pain and disability. Arthritis and Rheumatism. 2003; 48(8): 2207-2213.

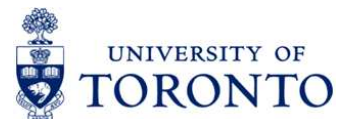

## Category

## D

## Cancer

Since the introduction of combination antiretroviral therapy the incidence of AIDS associated cancers such as Kaposi's sarcoma (KS) and Non-Hodgkin's Lymphoma (NHL) have declined (20).

However, incidence rates of non-AIDS associated cancers among adults living with HIV have increased, including anal cancer (43%), vaginal cancer (21%), and cervical cancer (19%) Hodgkin Lymphoma (15%), liver cancer (8%), lung cancer (3%), and melanoma cancers (3%) (20, 21). The pattern of breast cancer in adults living with HIV is unusual, as only a few cases have been reported (22, 23). Breast cancer is the most common form of cancer among women in the general population. While no increased incidence of breast cancer in women living with HIV has been identified, this form of cancer is becoming an increasingly important comorbidity for women living with HIV (22, 24).

Current evidence suggests low rates of screening for non-AIDS associated cancers among people living with HIV (24, 25).

#### Disability Experienced by Adults living with Cancer

Non-AIDS associated cancers can cause fatigue, weight loss, night sweats and diminished appetite (9). Symptoms of Non AIDS-associated cancers are often similar to symptoms of HIV/AIDS (25).

We present five recommendations pertaining to exercise for older adults living with HIV and general, lung, breast or metastatic cancer.

#### Di) - Cancer (General)

##### Di-1 – Exercise

**Recommendation 25:** A combination of aerobic and resistance exercise at moderate intensity may be recommended for older adults living with HIV and cancer to reduce cancer-related fatigue during and after treatment for cancer. Any exercise intervention should be individualized based on the targeted health outcome and cancer type.

**Level of Evidence:** High (Cochrane systematic review)

**Age of Participants in Research Evidence:** Mean age majority >50 years

#### References

Brown J, Huedo-Medina TB, Pescatello LS, Pescatello SM, Ferrer RA & Johnson BT. Efficacy of Exercise Interventions in Modulating Cancer-Related Fatigue among Adult Cancer Survivors: A Meta-Analysis. *Cancer Epidemiol Biomarkers Prev.* 2011; 20:123-133. DOI:10.1158/1055-9965.EPI-10-0988.



1  
2 Velthuis MJ, Agasi-Idenburg SC, Aufdemkampe G & Wittink HM. The Effect of Physical Exercise on Cancer-  
3 related Fatigue during Cancer Treatment: a Meta-analysis of Randomised Controlled Trials. Clinical  
4 Oncology. 2010; 22(3) 208–221. DOI: 10.1016/j.clon.2009.12.005.  
5

6  
7 Cramp F & Daniel J. Exercise for the management of cancer-related fatigue in adults. Cochrane Database of  
8 Systematic Reviews 2008, Issue 2. Art. No.: CD006145. DOI: 10.1002/14651858.CD006145.pub2. Available  
9 from: <http://summaries.cochrane.org/CD006145/the-effect-of-exercise-on-fatigue-associated-with-cancer>.  
10

11 **Recommendation 26: A combination of aerobic and resistive exercise** at least twice a  
12 week for at least 2 weeks at 50-90% maximum oxygen capacity (VO<sub>2</sub>max) intensity is safe  
13 and may be recommended for older adults living with cancer for improvements in  
14 physiological measures, symptoms, physical and psychosocial functioning of patients and  
15 health-related quality of life. Positive effects of exercise may vary as a function of the type  
16 of cancer; the stage of disease; the medical treatment; the nature, intensity, and duration  
17 of the exercise program; and the lifestyle of the individual.  
18  
19  
20

21  
22 **Level of Evidence:** Moderate (systematic review but not Cochrane)  
23

24 **Age of Participants in Research Evidence:** Age ranged 16-71 years  
25

26  
27 **References**

28 Spence RR, Heesch KC & Brown WJ. Exercise and cancer rehabilitation: A systematic review. Cancer  
29 Treatment Reviews. 2010; 36(2) 185–194. DOI: 10.1016/j.ctrv.2009.11.003.  
30

31 Knols R, Aaronson NK, Uebelhart D, Fransen J & Aufdemkampe D. Physical Exercise in Cancer Patients  
32 During and After Medical Treatment: A Systematic Review of Randomized and Controlled Clinical Trials. J  
33 Clin Oncol. 2005; 23(16): 3830-3842.  
34

35  
36 **Dii) Lung Cancer**  
37

38  
39 **Dii-1- Exercise**  
40

41 **Recommendation 27: Exercise** may be beneficial for self-empowerment and should be  
42 recommended for older adults living with HIV who are also living with **lung cancer** who are  
43 medically stable.  
44

45  
46 **Explanatory Notes:** Weak evidence exists on the effect of exercise among adults with lung cancer. Given  
47 the increasing prevalence of lung cancer as a non-AIDS related cancer for people living with HIV, the role for  
48 exercise may be particularly important with respect to this recommendation. Furthermore, rehabilitation  
49 professionals may want to consider their role in addressing smoking cessation among their clients living  
50 with HIV.  
51

52  
53 **Level of Evidence:** High (Cochrane systematic review)  
54



1  
2 **Age of Participants in Research Evidence:** Mean age >50 years  
3

4 **Reference**

5 Solà I, Thompson EM, Subirana Casacuberta M, Lopez C & Pascual A. Non-invasive interventions for  
6 improving well-being and quality of life in patients with lung cancer. Cochrane Database of Systematic  
7 Reviews 2004, Issue 4. Art. No.: CD004282. DOI: 10.1002/14651858.CD004282.pub2.  
8  
9

10 **Diii) Breast Cancer**

11 **Diii-1- Exercise**

12  
13  
14 **Recommendation 28a: Supervised aerobic exercise programs should be included during**  
15 **breast cancer** treatment for the management of cancer related fatigue for older women  
16 living with HIV and breast cancer who are medically stable.

17 **Recommendation 28b: A combination of aerobic and resistive exercise** at least 3 times  
18 per week for at least 6 weeks, 30-40 minutes per session, at moderate intensity (e.g. rate  
19 of perceived exertion 11-13 out of 20) appears to be safe and may be recommended for  
20 older women living with HIV undergoing or who have undergone treatment for **breast**  
21 **cancer** and who are medically stable for potential improvements in cardiopulmonary  
22 fitness, physical functioning, fatigue, and body composition and quality of life.  
23  
24  
25  
26

27  
28 **Level of Evidence** - High (Cochrane systematic review)  
29

30 **Age of Participants in Research Evidence:** Mean age majority >50 years  
31

32 **References**

33 Brown J, Huedo-Medina TB, Pescatello LS, Pescatello SM, Ferrer RA & Johnson BT. Efficacy of Exercise  
34 Interventions in Modulating Cancer-Related Fatigue among Adult Cancer Survivors: A Meta-Analysis. *Cancer*  
35 *Epidemiol Biomarkers Prev.* 2011; 20: 123-133. DOI:10.1158/1055-9965.EPI-10-0988  
36  
37

38 Chan DNS, Lui LYY & So WK. Effectiveness of exercise programmes on shoulder mobility and lymphoedema  
39 after axillary lymph node dissection for breast cancer: systematic review. *Journal of Advanced Nursing.*  
40 2010; 66(9): 1902-1914.  
41

42  
43 McNeely ML, Campbell K, Ospina M, Rowe BH, Dabbs K, Klassen TP, Mackey J & Courneya K. Exercise  
44 interventions for upper-limb dysfunction due to breast cancer treatment. *Cochrane Database of Systematic*  
45 *Reviews* 2010, Issue 6. Art. No.: CD005211. DOI: 10.1002/14651858.CD005211.pub2.  
46

47 Velthuis MJ, Agasi-Idenburg SC, Aufdemkampe G & Wittink HM. The Effect of Physical Exercise on Cancer-  
48 related Fatigue during Cancer Treatment: a Meta-analysis of Randomised Controlled Trials. *Clinical*  
49 *Oncology.* 2010; 22(3) 208–221. DOI: 10.1016/j.clon.2009.12.005.  
50

51  
52 Kim CJ, Kang DH & Park JW. A Meta-Analysis of Aerobic Exercise Interventions for Women With Breast  
53 Cancer. *Western Journal of Nursing Research.* 2009; 31(4): 437-461.  
54  
55

1  
2 Cramp F & Byron-Daniel J. Exercise for the management of cancer-related fatigue in adults. Cochrane  
3 Database of Systematic Reviews 2012, Issue 11. Art. No.: CD006145. DOI:  
4 10.1002/14651858.CD006145.pub3. Summary available from:  
5 <http://summaries.cochrane.org/CD006145/the-effect-of-exercise-on-fatigue-associated-with-cancer>  
6

7  
8 Brockow T, Markes M & Resch KL. Exercise for women receiving adjuvant therapy for breast cancer.  
9 Cochrane Database of Systematic Reviews 2006, Issue 4. Art. No.: CD005001. DOI:  
10 10.1002/14651858.CD005001.pub2.  
11

12 Ingram C, Courneya KS & Kingston D. The Effects of Exercise on Body Weight and Composition in Breast  
13 Cancer Survivors: An Integrative Systematic Review. *Oncology Nursing Forum*. 2006; 33(5): 937.  
14

15  
16 McNeely ML, Campbell K, Ospina M, Rowe BH, Dabbs K, Klassen TP, Mackey J & Courneya K. Exercise  
17 interventions for upper-limb dysfunction due to breast cancer treatment. *CMAJ*. 2006; 175(1):34-41.  
18 DOI:10.1503/cmaj.051073.  
19

For peer review only

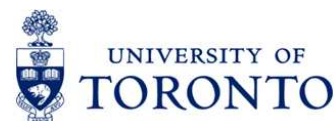

## Category E

### Stroke

The prevalence of stroke among adults living with HIV between 2000 and 2006 is 11%; these rates are much higher among older women living with HIV (14%) compared to older men living with HIV (10%) (3).

The incidence of stroke among adults living with HIV has increased with the introduction of combination antiretroviral therapy; adults living with HIV are more at risk of stroke with increased age and length of time using antiretroviral therapy (26).

The incidence rate for ischemic stroke among adults living with HIV has increased to 0.2% in 2006, compared to 0.1% in 1997 (26-28). HIV/AIDS also increases the risk of hemorrhagic stroke, but the risks are higher among the younger adults living with HIV compared to older adults living with HIV (27).

#### Disability Experienced by Adults with Stroke

Stroke can result in hospitalization and increased risk for developing opportunistic infections (27, 28). The occurrence of stroke may result in a combination of physical, cognitive, speech and mental health impairments, activity limitations, and social participation restrictions (29).

Injuries that can be sustained from the occurrence of a stroke include pressure sores, and pain in shoulder and other areas. Injuries from falls can also occur (29). Psychological challenges faced as a result of stroke include depression, anxiety, emotionalism, and confusion (29).

We present eight recommendations for rehabilitation, cognitive rehabilitation, exercise and therapeutic modality interventions for adults with living with HIV and stroke.

#### E.1 – Cognitive Rehabilitation

**Recommendation 29a:** Inconclusive or insufficient evidence exists to derive recommendations for **cognitive rehabilitation** interventions for older adults with HIV and stroke. While cognitive rehabilitation does not appear harmful, weak evidence exists to support the use of cognitive-specific interventions to improve spatial neglect, disability, memory, and functional status for older adults who experience stroke.

**Recommendation 29b:** Rehabilitation professionals should implement specific task oriented training with older adults living with HIV and stroke as this approach is key to retraining skill specific tasks related to function.

**Explanatory Notes:** Despite the lack of strong evidence supporting cognitive rehabilitation in stroke, neurocognitive impairments are a major concern for the aging people living with HIV/AIDS (PLHIV) population. There may be specific considerations for older adults with HIV with pre-existing neurocognitive impairments and stroke. From a rehabilitation perspective it will be important to obtain a clear baseline to determine what neurocognitive issues are specific to stroke.

**Level of Evidence:** Moderate (systematic review but not Cochrane) to High (Cochrane review)  
**Age of Participants in Research Evidence:** Majority of mean age >50 years [#730 younger participants]

**References**

Hoffmann T, Bennett S, Koh CL & McKenna KT. Occupational therapy for cognitive impairment in stroke patients. *Cochrane Database of Systematic Reviews* 2010, Issue 9. Art. No.: CD006430. DOI: 10.1002/14651858.CD006430.pub2.

Bowen A & Lincoln N. Cognitive rehabilitation for spatial neglect following stroke. *Cochrane Database of Systematic Reviews* 2007, Issue 2. Art. No.: CD003586. DOI: 10.1002/14651858.CD003586.pub2.

dasNair R & Lincoln N. Cognitive rehabilitation for memory deficits following stroke. *Cochrane Database of Systematic Reviews* 2007, Issue 3. Art. No.: CD002293. DOI: 10.1002/14651858.CD002293.pub2.

Park NW & Ingles JL. Effectiveness of attention rehabilitation after an acquired brain injury: a meta-analysis. *Neuropsychology*. 2001; 15(2): 199-210.

peer review only

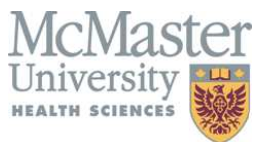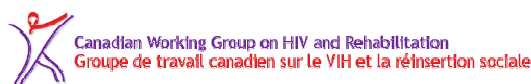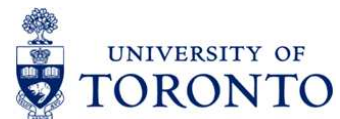

## E.2 – Rehabilitation

**Recommendation 30: Stroke rehabilitation for older adults with HIV should be multi-disciplinary** including occupational therapy, physical therapy, and speech-language pathology to improve the ability to undertake personal activities of daily living and reduce risk of deterioration in ability. Stroke rehabilitation may include the following components: therapeutic exercise, task-oriented training, gait-oriented training, balance training, strength training, wheelchair mobility, home modification, cognitive adaptation, and treatment of shoulder subluxation for those who experience a **sub-acute or post-acute stroke (within 1 year)**.

Specifically:

**Recommendation 30a: Repetitive, task-related training** in rehabilitation for lower limbs should be recommended to enhance functional activity, walking distance; walking speed; sit-to-stand, activities of daily living; measures of walking ability, and global motor function.

**Recommendation 30b: Very early mobilization** should be promoted for older adults with HIV to enhance earlier independent mobility.

**Recommendation 30c: Passive sensory training** (cutaneous electrical stimulation) may be recommended to improve hand function and dexterity in older adults living with HIV with stroke whereas evidence supporting improvements in spasticity and muscle strength is less convincing. Caution should be taken for this intervention for individuals with peripheral neuropathy due to altered sensation.

**Recommendation 30d: Task-oriented circuit class training** should be recommended to enhance gait and gait-related activities as evidence demonstrates this intervention is effective in improving walking ability, walking speed and balance however rehabilitation professionals should be aware of the potential for falls during any rehabilitation sessions and should put strategies in place to prevent against falls.

**Recommendation 30e: Strength training** should be recommended post stroke as it is not associated with increases in spasticity.

**Level of Evidence:** High (CPGs and Cochrane systematic reviews) and Moderate (systematic review but not Cochrane) to High (Cochrane review)

**Age of Participants in Research Evidence:** Majority of studies mean age > 50 years [2 studies had no age info] and Studies with participant >18 years

### References

English C & Hillier S. Circuit class therapy for improving mobility after stroke: a systematic review. J Rehabil Med. 2011; 43: 565–571.

Craig LE, Bernhardt J, Langhorne P & Wu O. Early mobilization after stroke: an example of an individual patient data meta-analysis of a complex intervention. Stroke. 2010; 41(11): 2632-2636.



1  
2 French B, Thomas L, Leathley M, Sutton C, McAdam J, Forster A, Langhorne P, Price C, Walker A & Watkins  
3 C. Does repetitive task training improve functional activity after stroke? A Cochrane systematic review and  
4 meta-analysis. *J Rehabil Med*. 2010; 42: 9–14.

5  
6  
7 Schabrun SM & Hillier S. Evidence for the retraining of sensation after stroke: a systematic review. *Clinical  
8 Rehabilitation*. 2009; 23: 27–39.

9  
10 Wevers L, van de Port I, Vermue M, Mead G & Kwakkel G. Effects of Task-Oriented Circuit Class Training on  
11 Walking Competency After Stroke: A Systematic Review. *Stroke*. 2009; 40:2450-2459. Originally published  
12 online May 21, 2009 doi: 10.1161/STROKEAHA.108.541946.

13  
14 Aziz NA, Leonardi-Bee J, Phillips MF, Gladman J, Legg LA & Walker M. Therapy-based rehabilitation services  
15 for patients living at home more than one year after stroke. *Cochrane Database of Systematic Reviews*  
16 2008, Issue 2. Art. No.: CD005952. DOI: 10.1002/14651858.CD005952.pub2.

17  
18  
19 Langhorne P & Widen-Holmqvist L. Early supported discharge after stroke. *Journal of Rehabilitation  
20 Medicine*. 2007; 39: 103-108. DOI: 10.2340/16501977-0042.

21  
22  
23 van de Port IG, Wood-Dauphinee S, Lindeman E & Kwakkel G. Effects of exercise training programs on  
24 walking competency after stroke: a systematic review. *Am J Phys Med Rehabil*. 2007; 86(11): 935–951.

25  
26  
27 Ottawa Panel. Ottawa Panel Evidence-Based Clinical Practice Guidelines for Post-Stroke Rehabilitation. *Top  
28 Stroke Rehabil*. 2006; 13(2):1–269.

29  
30 Moseley AM, Stark A, Cameron ID & Pollock A. Treadmill training and body weight support for walking after  
31 stroke. *Cochrane Database of Systematic Reviews* 2005, Issue 4. Art. No.: CD002840. DOI:  
32 10.1002/14651858.CD002840.pub2.

33  
34 Kwakkel G, van Peppen R, Wagenaar RC, Wood Dauphinee S, Richards C, Ashburn A, Miller K, Lincoln N,  
35 Partridge C, Wellwood I & Langhorne P. Effects of augmented exercise therapy time after stroke: A meta-  
36 analysis. *Stroke*. 2004; 35(11):2529-2539. Originally published online October 7, 2004. DOI:  
37 10.1161/01.STR.0000143153.76460.7d.

38  
39  
40 Legg L, Langhorne P & Outpatient Service Trialists. Rehabilitation therapy services for stroke patients living  
41 at home: systematic review of randomised trials. *Lancet*. 2004; 363(9406): 352-356.

42  
43  
44 Van Peppen RP, Kwakkel G, Wood-Dauphinee S, Hendriks HJ, Van der Wees PJ & Dekker J. The impact of  
45 physical therapy on functional outcomes after stroke: what's the evidence? *Clinical Rehabilitation*. 2004;  
46 18(8): 833-862.

47  
48  
49 **E.3 - Rehabilitation (Occupational Therapy)**

50 **Recommendation 31: Occupational therapy should be recommended** as a component of  
51 rehabilitation for older adults living with HIV with stroke as interventions targeted towards  
52 personal activities of daily living may increase activities of daily living (ADLs) and reduce  
53 mortality, deterioration and dependency.  
54

1  
2  
3 **Level of Evidence:** Moderate (meta-analysis and systematic reviews but not Cochrane)  
4

5 **Age of Participants in Research Evidence:** Mean age 71 years  
6

#### 7 **References**

8 Legg L, Drummond A, Leonardi-Bee J, Gladman JRF, Corr S, Donkervoort M, Edmans J, Gilbertson L,  
9 Jongbloed L, Logan P, Sackley C, Walker M & Langhorne P. Occupational therapy for patients with problems  
10 in personal activities of daily living after stroke: systematic review of randomised trials. BMJ. 2007;  
11 335(7626): 922.  
12

13  
14 Walker MF, Leonardi-Bee J, Bath P, Langhorne P, Dewey M, Corr S, Drummond A, Gilbertson L, Gladman JR,  
15 Jongbloed L, Logan P & Parker C. Individual patient data meta-analysis of randomized controlled trials of  
16 community occupational therapy for stroke patients. Stroke. 2004; 35(9): 2226-2232. Available from:  
17 <http://stroke.ahajournals.org/content/35/9/2226>.  
18  
19

#### 20 **E.4- Rehabilitation (Physical Therapy)**

21  
22 **Recommendation 32: Physiotherapy** comprised of a combination of interventions should  
23 be recommended for the recovery of postural control and lower limb function for older  
24 adults living with HIV following stroke.  
25  
26

27 **Level of Evidence:** Moderate (systematic review but not Cochrane)  
28

29 **Age of Participants in Research Evidence:** Studies with participant >18 years  
30

#### 31 **References**

32 Pollock A, Baer G, Langhorne P & Pomeroy V. Physiotherapy treatment approaches for the recovery of  
33 postural control and lower limb function following stroke: a systematic review. Clinical Rehabilitation. 2007;  
34 21(5): 395-410.  
35  
36

#### 37 **E.5 - Rehabilitation (Electromechanical and robotic gait training)**

38  
39 **Recommendation 33: Electromechanical-assisted gait training** in combination with  
40 physiotherapy may be recommended for older adults living with HIV with stroke  
41 (particularly those within 3 months post stroke) as this intervention is associated with a  
42 higher likelihood to achieve independent walking than gait training alone.  
43  
44  
45

46  
47 **Level of Evidence:** High (Cochrane systematic review)  
48

49 **Age of Participants in Research Evidence:** Mean age 61 years  
50  
51  
52  
53  
54  
55



1  
2  
3  
4  
5  
6  
7  
8  
9  
10  
11  
12  
13  
14  
15  
16  
17  
18  
19  
20  
21  
22  
23  
24  
25  
26  
27  
28  
29  
30  
31  
32  
33  
34  
35  
36  
37  
38  
39  
40  
41  
42  
43  
44  
45  
46  
47  
48  
49  
50  
51  
52  
53  
54  
55  
56  
57  
58  
59  
60

**Reference**

Mehrholz J, Werner C, Kugler J & Pohl M. Electromechanical-assisted training for walking after stroke. Cochrane Database of Systematic Reviews 2007, Issue 4. Art. No.: CD006185. DOI: 10.1002/14651858.CD006185.pub2.

**E.6 – Exercise**

**Recommendation 34: Combined aerobic and resistive exercise** should be a component of stroke rehabilitation for older adults living with HIV with stroke who are medically stable at any stage of motor recovery. Higher doses of exercise may be associated with better motor recovery. Specifically, **cardiorespiratory training** should be a component of exercise as evidence suggests speed, tolerance and independence during walking are improved. In addition, **strength training** may be a component of exercise as this can improve muscle strength in stroke patients and will not necessarily increase spasticity.

**Level of Evidence:** High (combination of systematic reviews and Cochrane reviews)

**Age of Participants in Research Evidence:** Majority of studies mean age >50 years

**References**

Cooke E, Mares K, Clark A, Tallis RC & Pomeroy VM. The effects of increased dose of exercise-based therapies to enhance motor recovery after stroke: a systematic review and meta-analysis. BMC Medicine. 2010; 8:60. Available from: <http://www.biomedcentral.com/1741-7015/8/60>.

Saunders DH, Greig CA, Mead GE & Young A. Physical fitness training for stroke patients. *Cochrane Database of Systematic Reviews* 2009, Issue 4. Art. No.:CD003316. DOI:10.1002/14651858.CD003316.pub3.

States RA, Pappas E & Salem Y. Overground physical therapy gait training for chronic stroke patients with mobility deficits. *Cochrane Database of Systematic Reviews* 2009, Issue 3. Art. No.: CD006075. DOI: 10.1002/14651858.CD006075.pub2.

Ada L, Dorsch S & Canning CG. Strengthening interventions increase strength and improve activity after stroke: a systematic review. *Australian Journal of Physiotherapy*. 2006; 52(4): 241-248.

Pang MYC, Eng JJ, Dawson AS & Gylfadottir S. The use of aerobic exercise training in improving aerobic capacity in individuals with stroke: a meta-analysis. *Clinical Rehabilitation*. 2006; 20(2): 97-111.

Meek C, Pollock A, Potter J & Langhorne P. A systematic review of exercise trials post stroke. *Clinical Rehabilitation*. 2003; 17(1): 6-13.

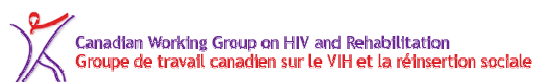

## E.7 - Electrotherapeutic Modalities

**Recommendation 35: Electrotherapeutic modalities** in isolation are not recommended for older adults living with HIV with stroke over conventional rehabilitation interventions strategies. Very weak to no evidence exists to support the use of electrotherapeutic modalities (functional electrical stimulation, biofeedback, visual feedback therapy) over conventional physical therapy interventions alone for muscle strength recovery, upper limb recovery or balance post stroke.

**Explanatory Notes:** Impairment-focused interventions alone such as biofeedback, neuromuscular or transcutaneous nerve stimulation fail to generalize to functional improvements and are not recommended in isolation for older adults with HIV and stroke. Particular caution should be taken by rehabilitation professionals working with older adults with HIV who may not have complete intact sensation as they may be at risk for injury with intervention such electronic stimulation, electrotherapeutic modalities.

**Level of Evidence:** Moderate (systematic reviews and meta-analyses but not Cochrane)

**Age of Participants in Research Evidence:** Mean age >50 years and Studies with participant >18 years

### References

Van Peppen RPS, Kortsmits M, Lindeman E & Kwakkel G. Effects of visual feedback therapy on postural control in bilateral standing after stroke: a systematic review. *Journal of Rehabilitation Medicine*. 2006; 38(1): 3-9.

Kottink AI, Oostendorp LJ, Buurke JH, Nene AV, Hermens HJ & IJzerman MJ. The orthotic effect of functional electrical stimulation on the improvement of walking in stroke patients with a dropped foot: a systematic review. *Artificial Organs*. 2004; 28(6): 577-586.

Van Peppen RP, Kwakkel G, Wood-Dauphinee S, Hendriks HJ, Van der Wees PJ & Dekker J. The impact of physical therapy on functional outcomes after stroke: what's the evidence? *Clinical Rehabilitation*. 2004; 18(8): 833-862.

Glanz M, Klawansky S, Stason W, Berkey C & Chalmers TC. Functional electrostimulation in poststroke rehabilitation: a meta-analysis of the randomized controlled trials. *Archives of Physical Medicine & Rehabilitation*. 1996; 77(6): 549-553.

Moreland J & Thomson MA. Efficacy of electromyographic biofeedback compared with conventional physical therapy for upper-extremity function in patients following stroke: a research overview and meta-analysis. *Physical Therapy*. 1994; 74(6): 534-54.

Category  
F

Cardiovascular Disease (CVD)

HIV disease has been associated with an increased risk of cardiovascular complications (30). Dyslipidemia (abnormal amounts of lipid in the blood), insulin resistance, and central obesity coupled with an aging HIV-positive population have led to an increased incidence of cardiovascular events for adults with HIV (31).

The prevalence of hypertension among adults living with HIV ranged from 41% to 54% between 2000 and 2007 with rates higher for women compared to men in the same population (3, 16).

The prevalence of heart disease among adults living with HIV is 15%, Rates of heart disease in women (23%) is more than 2 times the rate of men living with HIV (12%) (3, 16).

The prevalence of coronary heart disease among adults living with HIV ranges from 7–8% (32).

The prevalence of asymptomatic ischemic heart disease among adults ages 50-59 years living with HIV is 13%, and increases to 17% for adults 60 years or older (33).

The prevalence of asymptomatic peripheral arterial disease (PAD) is low, but identified only in adults living with HIV with high cardiovascular risk (31).

Disability Experienced by Adults with Cardiovascular Disease (CVD)

Cardiovascular risks include abnormally elevated levels of lipids and/or lipoproteins in the blood (hyperlipidaemia), fat redistribution syndrome, insulin resistance, diabetes mellitus, hypertension and increased hospitalization (16, 30, 33, 34).

Cardiovascular disease can also lead to events such as a myocardial infarction resulting in a range of impairments, activity limitations and participation restrictions for adults with HIV.

We present six recommendations for rehabilitation and exercise interventions for older adults with HIV and cardiovascular disease, myocardial infarction, heart disease, or heart failure.

Fi) Cardiovascular Disease (CVD)

Fi.1 – Cardiac Rehabilitation

**Recommendation 36: Cardiac rehabilitation** in the form of **home-based or centre-based care** may be recommended because these appear equally effective in improving the clinical & health related quality of life outcomes for older adults with HIV with low risk **cardiovascular disease**. The choice of home versus centre-based care should be reflective of the individual preference of the patient as this may impact the uptake of rehabilitation.

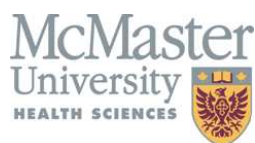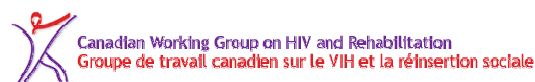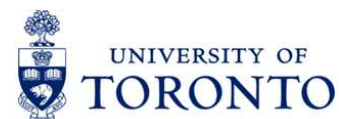

1  
2 **Level of Evidence:** High (Cochrane reviews) and Moderate (systematic reviews and meta-analyses but not  
3 Cochrane)  
4

5 **Age of Participants in Research Evidence:** Majority of mean age >50 years and Mean age >55 years  
6  
7

#### 8 **References**

9 Davies EJ, Moxham T, Rees K, Singh S, Coats AJS, Ebrahim S, Lough F & Taylor RS. Exercise based  
10 rehabilitation for heart failure. *Cochrane Database of Systematic Reviews* 2010, Issue 4. Art. No.:  
11 CD003331. DOI: 10.1002/14651858.CD003331.pub3.  
12

13 Taylor RS, Dalal H, Jolly K, Moxham T & Zawada A. Home-based versus centre-based cardiac rehabilitation.  
14 *Cochrane Database of Systematic Reviews* 2010, Issue 1. Art. No.: CD007130. DOI:  
15 10.1002/14651858.CD007130.pub2.  
16

17 Clark AM, Hartling L, Vandermeer B & McAlister FA. Meta-analysis: Secondary prevention programs for  
18 patients with coronary artery. *Annals of Internal Medicine*. 2005; 143(9): 659-672. DOI: 10.7326/0003-  
19 4819-143-9-200511010-00010.  
20

21 Herkner H, Thoennissen J, Nikfardjam M, Koreny M, Laggner AN & Mullner M. Short versus prolonged bed  
22 rest after uncomplicated acute myocardial infarction: a systematic review and meta-analysis. *Journal of*  
23 *Clinical Epidemiology*. 2003; 56(8): 775-781.  
24

25 Jolliffe J, Rees K, Taylor RRS, Thompson DR, Oldridge N, & Ebrahim S. Exercise-based rehabilitation for  
26 coronary heart disease. *Cochrane Database of Systematic Reviews* 2001, Issue 1. Art. No.: CD001800. DOI:  
27 10.1002/14651858.CD001800.  
28

29 Mullen PD, Mains DA & Velez R. A meta-analysis of controlled trials of cardiac patient education. *Patient*  
30 *Education & Counseling*. 1992; 19(2): 143-162. DOI: 10.1016/0738-3991(92)90194-N.  
31  
32

33 **Recommendation 37: Cardiac rehabilitation** for older adults with HIV should include  
34 reinforcement, feedback, offer opportunity for individualization, facilitate behaviour  
35 change through skills and resources and be relevant to patients' needs and abilities.  
36 Specifically, **motivational communication** such as formal cardiac rehabilitation program  
37 referral, reminder letters, phone calls and home visits may be recommended for  
38 increasing uptake and adherence of cardiac rehabilitation among older adults living with  
39 HIV and cardiovascular disease.  
40  
41  
42  
43  
44  
45

46 **Level of Evidence:** High (Cochrane reviews) and Moderate (systematic reviews and meta-analyses but not  
47 Cochrane)  
48

49 **Age of Participants in Research Evidence:** Majority of mean age >50 years and Mean age >55 years  
50  
51  
52  
53  
54  
55

1  
2  
3  
4  
5  
6  
7  
8  
9  
10  
11  
12  
13  
14  
15  
16  
17  
18  
19  
20  
21  
22  
23  
24  
25  
26  
27  
28  
29  
30  
31  
32  
33  
34  
35  
36  
37  
38  
39  
40  
41  
42  
43  
44  
45  
46  
47  
48  
49  
50  
51  
52  
53  
54  
55  
56  
57  
58  
59  
60

## References

Davies EJ, Moxham T, Rees K, Singh S, Coats AJS, Ebrahim S, Lough F & Taylor RS. Exercise based rehabilitation for heart failure. *Cochrane Database of Systematic Reviews* 2010, Issue 4. Art. No.: CD003331. DOI: 10.1002/14651858.CD003331.pub3.

Taylor RS, Dalal H, Jolly K, Moxham T & Zawada A. Home-based versus centre-based cardiac rehabilitation. *Cochrane Database of Systematic Reviews* 2010, Issue 1. Art. No.: CD007130. DOI: 10.1002/14651858.CD007130.pub2.

Clark AM, Hartling L, Vandermeer B & McAlister FA. Meta-analysis: Secondary prevention programs for patients with coronary artery. *Annals of Internal Medicine*. 2005; 143(9): 659-672. DOI: 10.7326/0003-4819-143-9-200511010-00010.

Herkner H, Thoennissen J, Nikfardjam M, Koreny M, Laggner AN & Mullner M. Short versus prolonged bed rest after uncomplicated acute myocardial infarction: a systematic review and meta-analysis. *Journal of Clinical Epidemiology*. 2003; 56(8): 775-781.

Jolliffe J, Rees K, Taylor RRS, Thompson DR, Oldridge N & Ebrahim S. Exercise-based rehabilitation for coronary heart disease. *Cochrane Database of Systematic Reviews* 2001, Issue 1. Art. No.: CD001800. DOI: 10.1002/14651858.CD001800.

Mullen, PD, Mains DA & Velez R. A meta-analysis of controlled trials of cardiac patient education. *Patient Education & Counseling*. 1992; 19(2): 143-162. DOI: 10.1016/0738-3991(92)90194-N.

## Fii) CVD - Myocardial Infarction

### Fii.1 – Cardiac Rehabilitation

**Recommendation 38a: Exercise-based cardiac rehabilitation** should be recommended for older adults with HIV who have undergone a myocardial infarction (MI) (otherwise known as a heart attack) (or at risk of an MI) given evidence suggests exercise based cardiac rehabilitation is effective in reducing cardiac deaths. The ideal frequency, intensity, time and type of exercise to maximize benefits are unclear.

**Recommendation 38b: Early mobilization and rehabilitation** and specifically, **secondary and tertiary prevention programs** (including counseling, education, and exercise) should be recommended to older adults living with HIV who experience an MI as these have the potential to reduce subsequent MI and mortality and improve processes of care, risk factor profiles and functional status and quality of life.

**Level of Evidence:** High (Cochrane reviews) and Moderate (systematic reviews and meta-analyses but not Cochrane)

**Age of Participants in Research Evidence:** Majority of mean age >50 years and Mean age >55 years



## References

Davies EJ, Moxham T, Rees K, Singh S, Coats AJS, Ebrahim S, Lough F & Taylor RS. Exercise based rehabilitation for heart failure. *Cochrane Database of Systematic Reviews* 2010, Issue 4. Art. No.: CD003331. DOI: 10.1002/14651858.CD003331.pub3.

Taylor RS, Dalal H, Jolly K, Moxham T & Zawada A. Home-based versus centre-based cardiac rehabilitation. *Cochrane Database of Systematic Reviews* 2010, Issue 1. Art. No.: CD007130. DOI: 10.1002/14651858.CD007130.pub2.

Clark AM, Hartling L, Vandermeer B & McAlister FA. Meta-analysis: Secondary prevention programs for patients with coronary artery. *Annals of Internal Medicine*. 2005; 143(9): 659-672. DOI: 10.7326/0003-4819-143-9-200511010-00010.

Herkner H, Thoennissen J, Nikfardjam M, Koreny M, Laggner AN & Mullner M. Short versus prolonged bed rest after uncomplicated acute myocardial infarction: a systematic review and meta-analysis. *Journal of Clinical Epidemiology*. 2003; 56(8): 775-781.

Jolliffe J, Rees K, Taylor RRS, Thompson DR, Oldridge N & Ebrahim S. Exercise-based rehabilitation for coronary heart disease. *Cochrane Database of Systematic Reviews* 2001, Issue 1. Art. No.: CD001800. DOI: 10.1002/14651858.CD001800.

Mullen PD, Mains DA & Velez R. A meta-analysis of controlled trials of cardiac patient education. *Patient Education & Counseling*. 1992; 19(2): 143-162. DOI: 10.1016/0738-3991(92)90194-N.

## Fiii) CVD - Coronary Artery Disease and Coronary Heart Disease

### Fiii.1 – Exercise

**Recommendation 39: Moderate intensity exercise (and potentially progressive resistive exercise) should be recommended** for older adults with HIV with **cardiovascular disease** who are medically stable to reduce high blood pressure and potentially mitigate the effect of coronary heart disease. Exercise may be associated with improved cardiovascular health and well-being as a result of enhanced self-efficacy. More research is required to determine the ideal frequency and duration of exercise that should be recommended to see psychological improvement. **High intensity aerobic exercise** may increase High Density Lipoprotein Cholesterol (HDL-C) levels, while **combined aerobic and resistance exercise** may lower Low Density Lipoprotein Cholesterol (LDL-C) levels and should be recommended for older adults with HIV to improve their cardiovascular health.

**Level of Evidence:** Moderate (systematic reviews but not Cochrane)

**Age of Participants in Research Evidence:** Two of the studies had mean age >50 years whereas other two studies participant ranged 18-80 years

**References**

Valkeinen H, Aaltonen S & Kujala UM. Effects of exercise training on oxygen uptake in coronary heart disease: a systematic review and meta-analysis. *Scandinavian Journal of Medicine & Science in Sports*. 2010; 20(4): 545-555. DOI: 10.1111/j.1600-0838.2010.01133.x.

Tambalis K, Panagiotakos DB, Kavouras SA & Sidossis LS. Responses of blood lipids to aerobic, resistance, and combined aerobic with resistance exercise training: A systematic review of current evidence. *ANGIOLOGY* 2009 60: 614. Originally published online 30 October 2008. Available from: <http://ang.sagepub.com/content/60/5/614>.

Netz Y, Wu M-J, Becker BJ, & Tenebaum G. Physical activity and psychological well-being in advanced age: A meta-analysis of intervention studies. *Psychology and Aging*. 2005; 20(2): 272–284. DOI: 10.1037/0882-7974.20.2.272.

Halbert JA, Silagy CA, Finucane P, Withers RT, Hamdorf PA & Andrews GR. The effectiveness of exercise training in lowering blood pressure: a meta-analysis of randomised controlled trials of 4 weeks or longer. *Journal of Human Hypertension*. 1997; 11(10): 641-649.

**Fiv) CVD – Heart Failure**

**Fiv.1 – Exercise**

**Recommendation 40: Home-based moderate intensity exercise (and potentially progressive resistive exercise) as well as supervised and hospital-based exercise programs** appear to be safe and should be recommended for older adults with HIV and heart failure who are medically stable for potential improvements in cardiac function, exercise capacity (including peak oxygen consumption), physical function, mortality and quality of life and potentially a reduction in hospital admissions. Optimal session frequency, session duration, exercise intensity, program duration is unclear.

**Level of Evidence:** High (combination of Cochrane systematic review and other systematic reviews) and Moderate (systematic review but not Cochrane)

**Age of Participants in Research Evidence:** Majority of studies mean age >50 years and Age range 19-83 years (only 6/31 studies had participant >80 years)

**References**

Davies P, Taylor F, Beswick A, Wise F, Moxham T, Rees K & Ebrahim S. Promoting patient uptake and adherence in cardiac rehabilitation. *Cochrane Database of Systematic Reviews* 2010, Issue 7.Art.No.:CD007131. DOI: 10.1002/14651858.CD007131.pub2.

Chien C-L, Lee CM Wu Y-W, Chen T-A & Wu Y-T. Home-based exercise increases exercise capacity but not quality of life in people with chronic heart failure: a systematic review. *Australian Journal of Physiotherapy*. 2008; 54(2): 87-93.

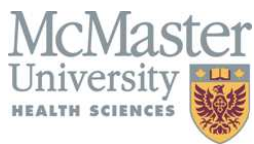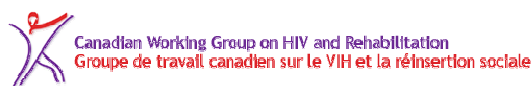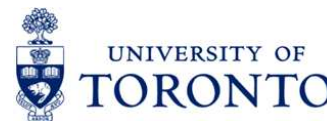

1  
2  
3 Haykowsky M, Clark AM, Liang Y, Pechter D, Jones LW & McAlister FA. A meta-analysis of the effect of  
4 exercise training on left ventricular remodeling in heart failure patients: The benefit depends on the type of  
5 training performed. ACC Cardiosource Review Journal. 2007; 16(10): 33-37.  
6

7  
8 Smart N & Marwick TH. Exercise training for patients with heart failure: a systematic review of factors that  
9 improve mortality and morbidity. American Journal of Medicine. 2004; 116(10): 693-706.  
10

11 Lloyd-Williams F, Mair FS & Leitner M. Exercise training and heart failure: a systematic review of current  
12 evidence. British Journal of General Practice. 2002; 52(474): 47-55.  
13

14 Halbert JA, Silagy CA, Finucane P, Withers RT & Hamdorf PA. Exercise training and blood lipids in  
15 hyperlipidemic and normolipidemic adults: a meta-analysis of randomized, controlled trials. European  
16 Journal of Clinical Nutrition. 1999; 53(7): 514-522.  
17  
18  
19

20  
21 **Recommendation 41: Aerobic exercise (and possibly resistive exercise) at least 3 times**  
22 **per week may be recommended to older adults living with HIV and hyperlipidemia for the**  
23 **potential to improve blood lipids. Clinical importance of the changes is unclear.**  
24

25 **Level of Evidence:** Moderate (systematic review but not Cochrane)  
26

27 **Age of Participants in Research Evidence:** Age range 19-83 years (only 6/31 studies had participant >80  
28 years  
29

### 30 Reference

31 Halbert JA, Silagy CA, Finucane P, Withers RT & Hamdorf PA. Exercise training and blood lipids in  
32 hyperlipidemic and normolipidemic adults: a meta-analysis of randomized, controlled trials. European  
33 Journal of Clinical Nutrition. 1999; 53(7): 514-522.  
34  
35  
36  
37  
38  
39  
40  
41  
42  
43  
44  
45  
46  
47  
48  
49  
50  
51  
52  
53  
54  
55  
56  
57  
58  
59  
60



Category  
G

Mental Health Challenges

Although older adults living with HIV report more depressive symptoms and higher levels of life-stressor burden than their younger counterparts, older adults reported advanced age provided them with more adaptive coping and problem-solving skills. They also reported feeling less threatened by illness and disability compared to younger persons with HIV (16, 35, 36).

Depression in adults living with HIV is associated with neuropsychological impairment. Approximately 25% of older adults living with HIV are diagnosed with depression (36-38). The prevalence of psychological disorders (such as depression) among adults with HIV is 17%, and are more prevalent among older women living with HIV (23%) compared to older men living with HIV (14%) (3).

**Disability Experienced by Adults with Mental Health Challenges**

Challenges experienced by adults living with HIV and mental health issues include HIV-associated stigma, increased loneliness, decreased cognitive functioning, reduced level of energy, employment worries and reduced access to health care and social services due to AIDS-related stigma (36, 39, 40).

We present four recommendations for models of care, exercise, psychotherapy, and housing interventions for older adults living with HIV and varying forms of mental health issues.

**Gi) Mental Health Challenges (Older adults with mental health issues)**

**Gi.1 – Models of Care**

**Recommendation 42:** Inconclusive or insufficient evidence exists to support a recommendation for a specific model of mental health care (**acute psychogeriatric care over acute psychiatric units versus other mental health services**) for older adults with HIV living with **mental health issues**. More research is needed before recommending one model of care over another.

**Level of Evidence:** Moderate (systematic review but not Cochrane)

**Age of Participants in Research Evidence:** All participant >60 years

**Reference**

Draper B & Low L-F. What is the effectiveness of acute hospital treatment of older people with mental disorders? *International Psychogeriatrics*. 2005; 17(4): 539-555.



## Gii) Mental Health Challenges (anxiety)

### Gii.1 – Exercise

**Recommendation 43:** Exercise appears safe and should be recommended (approximately 30 minutes per session) to older adults with HIV living with other chronic conditions illnesses such as cardiovascular disease (CVD), cancer, chronic pain, fibromyalgia as a way to reduce symptoms of **anxiety**.

**Level of Evidence:** Moderate (systematic review and meta-analysis but not Cochrane)

**Age of Participants in Research Evidence:** Mean age 50 years

#### Reference

Herring MP, O'Connor PJ & Dishman RK. The effect of exercise training on anxiety symptoms among patients: a systematic review. *Archives of Internal Medicine*. 2010; 170(4): 321-331.

## Giii) Mental Health Challenges (Depression)

### Giii.1 – Psychotherapy

**Recommendation 44:** Inconclusive or insufficient evidence exists to support the use of **cognitive behavioural therapy** with older adults with HIV and **depression**.

**Explanatory Notes:** Despite inconclusive evidence, clinicians and PLHIV reported using this intervention in their practice with adults with HIV who are depressed.

**Level of Evidence:** High (Cochrane review)

**Age of Participants in Research Evidence:** All participants >55 years

#### Reference

Wilson K, Mottram PG & Vassilas C. Psychotherapeutic treatments for older depressed people. *Cochrane Database of Systematic Reviews* 2008, Issue 1. Art. No.: CD004853. DOI: 10.1002/14651858.CD004853.pub2.

## Giv) Mental Health Challenges (severe mental illness)

### Giv.1 – Housing Models

**Recommendation 45:** Supporting older adults living with HIV in securing **safe and stable housing** should be an important component of the rehabilitation process for older adults with HIV with **severe mental illness** given the positive impact of stable housing for this target population.

1  
2 **Level of Evidence:** Moderate (meta-analysis but not Cochrane)

3  
4 **Age of Participants in Research Evidence:** Younger adults (mean age 39 years)

5  
6 **Reference**

7 Leff HS, Chow CM, Pepin R, Conley J, Allen IE & Seaman CA. Does one size fit all? What we can and can't  
8 learn from a meta-analysis of housing models for persons with mental illness. *Psychiatric Services*. 2009;  
9 60(4): 473-482.  
10  
11  
12  
13  
14  
15  
16  
17  
18  
19  
20  
21  
22  
23  
24  
25  
26  
27  
28  
29  
30  
31  
32  
33  
34  
35  
36  
37  
38  
39  
40  
41  
42  
43  
44  
45  
46  
47  
48  
49  
50  
51  
52  
53  
54  
55

For peer review only

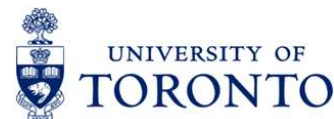

# Category

## H

### Cognitive Impairments

As many as 50% of adults living with HIV report cognitive difficulties, which can be associated with neuropsychological impairment (41, 42).

HIV-associated neurocognitive disorders (HAND) has been divided into three subclasses: asymptomatic neurocognitive impairments, mild neurocognitive disorder and HIV-associated dementia (HAD) (43). The prevalence of HIV-associated dementia (HAD) ranges from 8-15% for older men and women living with HIV (44, 45). Approximately 15% of adults living with HIV have Minor Cognitive Motor Disorder (MCMD) (46).

The process of neurological decline similar to Alzheimer's disease and Parkinson's disease (Parkinsonism related to HIV) has been reported in adults living with HIV (4, 47). The prevalence of Parkinsonism related to HIV is very low, ranging from 1% to 5% (47).

#### Disability Experienced with Cognitive Impairments

The challenges faced by adults living with HIV and cognitive disorders may include lower attention, motor speed, constructional abilities (impairment forming designs, objects, or materials with hands, under visual guidance), and verbal memory (41, 48-51).

The challenges specific to HAD include psychomotor slowing, apathy and motor disorders, similar to the bradykinesia and postural and gait abnormalities observed in late Parkinson's disease (52).

We present three recommendations for cognitive rehabilitation and exercise interventions for older adults living with HIV with varying levels of neurocognitive impairments.

#### Hi) Cognitive Impairment – Mild to Moderate Cognitive Impairment

##### Hi.1 – Cognitive Rehabilitation

**Recommendation 46: Cognitive interventions** including cognitive training, cognitive stimulation, and cognitive rehabilitation should be recommended for older adults living with HIV with **mild cognitive impairment** because they are associated with significant improvements objective and subjective measures of memory, quality of life and mood / anxiety with benefits translated to improvements in daily functioning and mood. Specifically, **errorless learning** may be recommended for a potential positive effect on recall for older adults with HIV and cognitive impairment.

**Level of Evidence:** Moderate (systematic review but not Cochrane)

**Age of Participants in Research Evidence:** Younger and older adults with cognitive impairment

1  
2  
3  
4  
5  
6  
7  
8  
9  
10  
11  
12  
13  
14  
15  
16  
17  
18  
19  
20  
21  
22  
23  
24  
25  
26  
27  
28  
29  
30  
31  
32  
33  
34  
35  
36  
37  
38  
39  
40  
41  
42  
43  
44  
45  
46  
47  
48  
49  
50  
51  
52  
53  
54  
55  
56  
57  
58  
59  
60

## References

Jean L, Bergeron ME, Thivierge S & Simard M. Cognitive intervention programs for individuals with mild cognitive impairment: Systematic review of the literature. *American Journal of Geriatric Psychiatry*. 2010; 18(4): 281-296.

Hauer K, Becker C, Lindemann U & Beyer N. Effectiveness of physical training on motor performance and fall prevention in cognitively impaired older persons: A systematic review. *American Journal of Physical Medicine and Rehabilitation*. 2006; 85(10): 847-857.

Kessels RPC & Haan EHF. Implicit Learning in Memory Rehabilitation: A Meta- Analysis on Errorless Learning and Vanishing Cues Methods', *Journal of Clinical and Experimental Neuropsychology*. 2003; 25(6), 805-814. DOI: 10.1076/jcen.25.6.805.16474.

## Hii) Cognitive Impairment

### Hii.1 – Exercise

**Recommendation 47:** A combination of aerobic and resistive (strengthening) exercise should be recommended for older adults living with HIV with cognitive impairment for improvements in fitness, physical function, cognitive function, and positive behaviour. Evidence suggests older adults with cognitive impairment may benefit from exercise as much as older adults with no cognitive impairment. Due to diversity in exercise programs, measures of cognition, and study populations in the evidence, the optional type of exercise program (content, intensity, frequency, and duration) is unclear.

**Recommendation 47a:** Specifically, aerobic exercise may be associated with improvements in neurocognitive function among older adults with HIV with cognitive impairment for attention and processing speed, executive function, and memory.

**Level of Evidence:** Moderate (systematic review and meta-analysis but not Cochrane)

**Age of Participants in Research Evidence:** Majority of studies included older adults >60 years

## References

Smith PJ, Blumenthal JA, Hoffman BM, Cooper H, Strauman TA, Welsh-Bohmer K, Browndyke JN & Sherwood A. Aerobic Exercise and Neurocognitive Performance: A Meta-Analytic Review of Randomized Controlled Trials. *Psychosomatic Medicine*. 2010; 72(3): 239–252. DOI: 10.1097/PSY.0b013e3181d14633.

Heyn PC, Johnson KE & Kramer AF. Endurance and strength training outcomes on cognitively impaired and cognitively intact older adults: a meta-analysis. *Journal of Nutrition, Health & Aging*. 2008; 12(6): 401-409.

van Uffelen JG, Chin A Paw MJ, Hopman-Rock M & van Mechelen W. The Effects of Exercise on Cognition in Older Adults With and Without Cognitive Decline: A Systematic Review. *Clin J Sport Med*. 2008; 18(6):486–500.

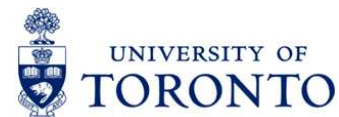

1  
2 Heyn P, Abreu BC & Ottenbacher KJ. The effects of exercise training on elderly persons with cognitive  
3 impairment and dementia: a meta-analysis. *Archives of Physical Medicine & Rehabilitation*. 2004; 85(10):  
4 1694-1704.

### 5 6 **Hiii) Cognitive Impairment – Dementia**

#### 7 8 **Hiii.1 – Exercise**

9  
10 **Recommendation 48:** Physical exercise appears to be safe and may be recommended for  
11 older adults living with HIV and dementia however insufficient evidence exists to suggest  
12 benefits to cognition, function, behaviour, depression, and mortality.  
13

14  
15 **Level of Evidence:** High (majority Cochrane systematic reviews)  
16

17  
18 **Age of Participants in Research Evidence:** Older adults >65 years  
19

#### 20 **References**

21 Forbes D, Forbes S, Morgan DG, Markle-Reid M, Wood J & Culum I. Physical activity programs for persons  
22 with dementia. *Cochrane Database of Systematic Reviews* 2008, Issue 3. Art. No.: CD006489. DOI:  
23 10.1002/14651858.CD006489.pub2.  
24

25  
26 Robinson L, Hutchings D, Dickinson HO, Corner L, Beyer F, Finch T, Hughes J, Vanoli A, Ballard C & Bond J.  
27 Effectiveness and acceptability of non-pharmacological interventions to reduce wandering in dementia: a  
28 systematic review. *International Journal of Geriatric Psychiatry*. 2007; 22(1): 9-22.  
29  
30  
31  
32  
33  
34  
35  
36  
37  
38  
39  
40  
41  
42  
43  
44  
45  
46  
47  
48  
49  
50  
51  
52  
53  
54  
55



## Category

## I

**Chronic Obstructive Pulmonary Disease (COPD)**

Chronic Obstructive Pulmonary Disease (COPD) occurs in more than 5% of the general population of adults over 45 years of age (53). COPD includes chronic bronchitis, emphysema and asthma. The prevalence of COPD among older adults living with HIV ranges from 10 - 16%, and is more prevalent among women (21%) compared with men (14%) living with HIV (3, 54).

With an increased prevalence of smoking among people living with HIV compared to the general population, adults with HIV are at increased risk of developing COPD (3, 18).

**Disability Experienced by Adults with COPD**

Challenges faced by adults living with HIV and COPD may include small airways abnormalities and nonspecific airway hyper-responsiveness. Challenges may also include shortness of breath, decreased activity tolerance, and a productive cough (3, 54).

We present three recommendations for pulmonary rehabilitation, exercise, and inspiratory muscle training (IMT) interventions for older adults living with HIV and COPD.

**I.1 – Pulmonary Rehabilitation**

**Recommendation 49: Pulmonary rehabilitation** (including upper and lower extremity exercise, inspiratory muscle training and breathing exercises) for at least four weeks is safe and strongly recommended for older adults living with HIV who have chronic obstructive pulmonary disease (COPD) to reduce mortality, improve dyspnea, health-related quality of life, functional exercise capacity and reduce future hospital admissions. Individuals with more severe COPD may require longer rehabilitation programs of at least 6 months to demonstrate benefits.

**Level of Evidence:** High (combination of Cochrane systematic reviews and meta-analysis but not Cochrane)

**Age of Participants in Research Evidence:** Majority of participants >60 years

**References**

Puhan MA, Gimeno-Santos E, Scharplatz M, Troosters T, Walters EH & Steurer J. Pulmonary rehabilitation following exacerbations of chronic obstructive pulmonary disease. Cochrane Database of Systematic Reviews 2009, Issue 1. Art. No.: CD005305. DOI: 10.1002/14651858.CD005305.pub2.

Oh H & Seo W. Meta-analysis of the effects of respiratory rehabilitation programmes on exercise capacity in accordance with programme characteristics. Journal of Clinical Nursing. 2007; 16(1): 3-15.

Lacasse Y, Goldstein R, Lasserson TJ & Martin S. Pulmonary rehabilitation for chronic obstructive pulmonary disease. Cochrane Database of Systematic Reviews 2006, Issue 4. Art. No.: CD003793. DOI: 10.1002/14651858.CD003793.pub2.



## I.2 – Exercise

**Recommendation 50: Aerobic and progressive resistance exercise** at least two times per week for at least 8 weeks appears feasible, safe and may be recommended for older adults with HIV with **mild to moderate chronic obstructive pulmonary disease (COPD)** for improvements in exercise capacity and muscle strength that may translate into improved activity performance and societal participation. Careful consideration is required when prescribing progressive resistance exercise programs for people with COPD who have comorbid health conditions.

**Level of Evidence:** Moderate (systematic reviews and meta-analyses but not Cochrane)

**Age of Participants in Research Evidence:** Mean age >58 years

### References

O'Shea SD, Taylor NF & Paratz JD. Progressive resistance exercise improves muscle strength and may improve elements of performance of daily activities for people with COPD: A systematic review. *Chest*. 2009; 136(5): 1269-1283. Prepublished online September 4, 2009. DOI: 10.1378/chest.09-0029. Available from <http://chestjournal.chestpubs.org/content/136/5/1269.full.html>.

Chavannes N, Vollenberg JJH, van Schayck CP & Wouters EFM. Effects of physical activity in mild to moderate COPD: a systematic review. *British Journal of General Practice*. 2002; 52(480): 574-578.

## I.3 – Inspiratory Muscle Training (IMT)

**Recommendation 51: Inspiratory muscle training (IMT)** is an important component of pulmonary rehabilitation and is strongly recommended for older adults living with HIV with chronic obstructive pulmonary disease (COPD) to improve inspiratory muscle strength and endurance, dyspnea, exercise capacity and quality of life. Optimal frequency, intensity, supervision and duration of IMT is unclear.

**Level of Evidence:** High (used Cochrane methodology)

**Age of Participants in Research Evidence:** Mean age 63 years

### References

Geddes, E. L., O'Brien K, W. D. Reid, Brooks D & Crowe J. Inspiratory muscle training in adults with chronic obstructive pulmonary disease: a systematic review. *Respiratory Medicine*. 2008; 99(11): 1440-1458. DOI of original article: 10.1016/j.rmed.2008.07.005.

Lotters F, van Tol B, Kwakkel G & Gosselink R. Effects of controlled inspiratory muscle training in patients with COPD: A meta-analysis. *European Respiratory Journal*. 2002; 20(3): 570-576.

## Category

## J

## Diabetes

The prevalence of diabetes mellitus (DM) among adults living with HIV ranges from 3-15% (3, 55, 56). Diabetes mellitus is 2 times more prevalent among men compared to women living with HIV (3). With the presence of Hepatitis C, the prevalence of diabetes mellitus can increase up to 6% from 3% (55, 56).

Risk factors for developing diabetes include advancing age, being male, long period of HIV infection, and specific ethnicity (African Descent, Hispanic/Latino and Aboriginal) (5).

Adults living with HIV on combination antiretroviral therapy are at increased risk of developing diabetes, thus individuals should be screened for diabetes at onset of therapy initiation and about two to six months after (5).

### Disability Experienced by Adults with Diabetes

Challenges faced among adults living with HIV and diabetes are lower body mass index preceded by impaired insulin tolerance and resistance, and high rates of Hepatitis C-virus infections (56, 57).

We present one recommendation for exercise for older adults living with HIV and diabetes.

### J.1 – Exercise

**Recommendation 52: Aerobic resistive exercise** for at least 8 weeks is strongly recommended for older adults living with HIV with diabetes (type 2) to improve cardiopulmonary fitness and ensure glucose control. Optimal frequency, intensity, time and type of exercise are unclear however evidence suggests increased exercise prescription, fitness testing, supervision and group sessions at a greater number of times per week may be associated with greater health benefits. See the specific guidelines for more details.

**Explanatory Notes:** Exercise may also be considered as a preventative approach to prevent type 2 diabetes among older adults with HIV. Exercise may be particularly important in building up strength among PLHIV who may have had muscle wasting and poor nutrition related to diabetes

**Level of Evidence:** High (combination of Cochrane systematic reviews and meta-analyses not Cochrane)

**Age of Participants in Research Evidence:** Three of four studies - participant mean age 55 years (type 2 diabetes)

### References

Nielsen PJ, Hafdahl AR, Conn VS, LeMaster JW & Brown SA. Meta-analysis of the effect of exercise interventions on fitness outcomes among adults with type 1 and type 2 diabetes. *Diabetes Research & Clinical Practice*. 2006; 74(2): 111-120.

Snowling NJ & Hopkins WG. Effects of Different Modes of Exercise Training on Glucose Control and Risk Factors for Complications in Type 2 Diabetic Patients. *Diabetes Care*. 2006; 29(11): 2518-27. Available from: <http://care.diabetesjournals.org/content/29/11/2518.full?sid=1c88f8f9-d4c9-4a13-9063-8613e7129ab5>.

1  
2  
3  
4  
5  
6  
7  
8  
9  
10  
11  
12  
13  
14  
15  
16  
17  
18  
19  
20  
21  
22  
23  
24  
25  
26  
27  
28  
29  
30  
31  
32  
33  
34  
35  
36  
37  
38  
39  
40  
41  
42  
43  
44  
45  
46  
47  
48  
49  
50  
51  
52  
53  
54  
55  
56  
57  
58  
59  
60

Thomas D, Elliott EJ & Naughton GA. Exercise for type 2 diabetes mellitus. *Cochrane Database of Systematic Reviews* 2006, Issue 3. Art. No.: CD002968. DOI: 10.1002/14651858.CD002968.pub2.

Boulé NG, Kenny GP, Haddad E. Wells GA & Sigal RJ. Meta-analysis of the effect of structured exercise training on cardiorespiratory fitness in Type 2 diabetes mellitus. *Diabetologia*. 2003; 46(8):1071–1081.

For peer review only

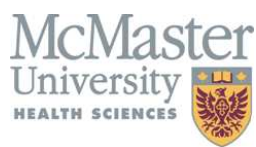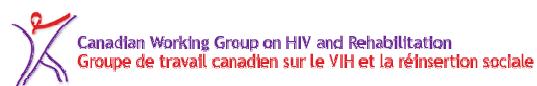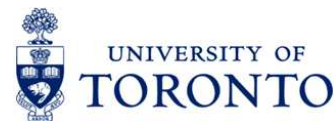

Figure 1: Overall Classification Evidence-Informed Recommendations

**Stream A Recommendations**  
HIV Aging and Rehabilitation  
Derived from 42 low or very low level evidence articles

| Recommendation Theme                                                                                                    | #         |
|-------------------------------------------------------------------------------------------------------------------------|-----------|
| Preparedness of Rehabilitation Professionals                                                                            | 1         |
| Approaches to Rehabilitation Assessment and Treatment (physical, mental, neurocognitive, uncertainty, social inclusion) | 7         |
| Extrinsic Factors to consider with rehabilitation of older adults with HIV (ageism, stigma, disclosure, social support) | 3         |
| Intrinsic Factors to consider with rehabilitation of older adults with HIV (self-management, spirituality)              | 2         |
| Rehabilitation Approaches (interprofessional practice, CAM)                                                             | 2         |
| Rehabilitation Interventions (exercise)                                                                                 | 1         |
| <b>Total # Recommendations</b>                                                                                          | <b>16</b> |

**Stream B Recommendations**  
Rehabilitation Interventions in Comorbidities  
Derived from 108 high level evidence articles (meta-analyses or systematic reviews)

| Recommendation Classification                                                            | #         |
|------------------------------------------------------------------------------------------|-----------|
| <b>Bone and Joint Disorders</b><br>Exercise, rehabilitation, self-management             | 4         |
| <b>Cancer</b><br>Exercise                                                                | 4         |
| <b>Stroke</b><br>Rehabilitation, cognitive rehabilitation, electrotherapeutic modalities | 7         |
| <b>Cardiovascular Disease</b><br>Cardiac rehabilitation, exercise                        | 6         |
| <b>Mental Health</b><br>Exercise, psychotherapy, models of care and housing models       | 4         |
| <b>Cognitive Impairment</b><br>Exercise, cognitive rehabilitation                        | 3         |
| <b>COPD</b><br>Pulmonary rehabilitation, inspiratory muscle training, exercise           | 3         |
| <b>Diabetes</b><br>Exercise                                                              | 1         |
| <b>Older Adults</b><br>Exercise                                                          | 3         |
| <b>HIV</b><br>Exercise                                                                   | 1         |
| <b>Total # Recommendations</b>                                                           | <b>36</b> |

52 Detailed (Specific) Evidence-Informed Recommendations

Endorsement Rates for Each Recommendation Ranged from 53% - 100%

Overarching Recommendations on Rehabilitation for Older Adults with HIV (n=8)

1) Rehabilitation Professionals (RPs) should be **prepared to provide care** to older adults with HIV who present with complex comorbidities...

2) RPs should adopt an **individualized approach to practice, sensitive to unique values, preferences and needs** of older adults with HIV...

3) **Multidisciplinary rehabilitation** is strongly recommended across continuum of care...

4) RPs should consider the role of **extrinsic contextual factors** (stigma, ageism, HIV disclosure, social supports)....

5) RPs should consider the role of **intrinsic contextual factors** (self-management, spirituality) ....

6) **Aerobic and resistive exercise** may be recommended for older adults with HIV who are medically stable and living with comorbidities....

7) **Cognitive rehabilitation** interventions may be recommended for older adults with HIV with mild cognitive impairments and stroke...

8) In absence of high level evidence RPs should **refer to high level evidence for recommendations on interventions for a specific comorbidity**....

## Evidence-Informed Recommendations in Rehabilitation for Older Adults Living HIV

## REFERENCES (Background)

1. Public Health Agency of Canada. HIV/AIDS Epi Update, Chapter 6: HIV/AIDS Among Older Canadians. Ontario, Canada: Centre for Communicable Disease and Infection Control, Public Health Agency of Canada. 2010.
2. Centre for Disease Control (CDC). HIV/AIDS Surveillance Report. Atlanta, US DHHS: Public Health Service, Centres for Disease Control and Prevention. 2007.
3. Magalhaes MG, Greenberg B, Hansen H, Glick M. Comorbidities in older patients with HIV: a retrospective study. *J Am Dent Assoc.* 2007;138(11):1468-75. Epub 2007/11/03.
4. Kearney F, Moore AR, Donegan CF, Lambert J. The ageing of HIV: implications for geriatric medicine. *Age and ageing.* 2010;39(5):536-41. Epub 2010/08/06.
5. Kalra S, Kalra B, Agrawal N, Unnikrishnan A. Understanding diabetes in patients with HIV/AIDS. *Diabetology & metabolic syndrome.* 2011;3(1):2. Epub 2011/01/15.
6. Carr A, Samaras K, Burton S, Law M, Freund J, Chisholm DJ, et al. A syndrome of peripheral lipodystrophy, hyperlipidaemia and insulin resistance in patients receiving HIV protease inhibitors. *Aids.* 1998;12(7):F51-8. Epub 1998/06/10.
7. Paccou J, Viget N, Legroux-Gerot I, Yazdanpanah Y, Cortet B. Bone loss in patients with HIV infection. *Joint, bone, spine : revue du rhumatisme.* 2009;76(6):637-41. Epub 2009/12/01.
8. Amorosa V, Tebas P. Bone disease and HIV infection. *Clinical infectious diseases : an official publication of the Infectious Diseases Society of America.* 2006;42(1):108-14. Epub 2005/12/03.
9. Lieberman R. HIV in older Americans: an epidemiologic perspective. *J Midwifery Womens Health.* 2000;45(2):176-82.
10. Arnsten JH, Freeman R, Howard AA, Floris-Moore M, Lo Y, Klein RS. Decreased bone mineral density and increased fracture risk in aging men with or at risk for HIV infection. *Aids.* 2007;21(5):617-23. Epub 2007/02/23.
11. Goodroad BK. HIV and AIDS in people older than 50. A continuing concern. *Journal of gerontological nursing.* 2003;29(4):18-24. Epub 2003/04/25.
12. Goulet JL, Fultz SL, Rimland D, Butt A, Gibert C, Rodriguez-Barradas M, et al. Aging and infectious diseases: do patterns of comorbidity vary by HIV status, age, and HIV severity? *Clinical infectious diseases : an official publication of the Infectious Diseases Society of America.* 2007;45(12):1593-601. Epub 2008/01/15.
13. Arnsten JH, Freeman R, Howard AA, Floris-Moore M, Santoro N, Schoenbaum EE. HIV infection and bone mineral density in middle-aged women. *Clinical infectious diseases : an official publication of the Infectious Diseases Society of America.* 2006;42(7):1014-20. Epub 2006/03/03.
14. Gerstner G, Damiano ML, Tom A, Worman C, Schultz W, Recht M, et al. Prevalence and risk factors associated with decreased bone mineral density in patients with haemophilia. *Haemophilia : the official journal of the World Federation of Hemophilia.* 2009;15(2):559-65. Epub 2009/02/04.
15. Cazanave C, Dupon M, Lavignolle-Aurillac V, Barthe N, Lawson-Ayayi S, Mehzen N, et al. Reduced bone mineral density in HIV-infected patients: prevalence and associated factors. *Aids.* 2008;22(3):395-402. Epub 2008/01/16.
16. Onen NF, Overton ET, Seyfried W, Stumm ER, Snell M, Mondy K, et al. Aging and HIV infection: a comparison between older HIV-infected persons and the general population. *HIV clinical trials.* 2010;11(2):100-9. Epub 2010/06/15.
17. Law MR, Hackshaw AK. A meta-analysis of cigarette smoking, bone mineral density and risk of hip fracture: recognition of a major effect. *Bmj.* 1997;315(7112):841-6. Epub 1997/11/14.



**Evidence-Informed Recommendations in Rehabilitation for Older Adults Living HIV**

18. Rahmanian S, Wewers ME, Koletar S, Reynolds N, Ferketich A, Diaz P. Cigarette smoking in the HIV-infected population. *Proceedings of the American Thoracic Society*. 2011;8(3):313-9. Epub 2011/06/10.
19. Tehranzadeh J, Ter-Oganesyan RR, Steinbach LS. Musculoskeletal disorders associated with HIV infection and AIDS. Part II: non-infectious musculoskeletal conditions. *Skeletal radiology*. 2004;33(6):311-20. Epub 2004/05/06.
20. Highly active antiretroviral therapy and incidence of cancer in human immunodeficiency virus-infected adults. *Journal of the National Cancer Institute*. 2000;92(22):1823-30. Epub 2000/11/18.
21. Patel P, Hanson DL, Sullivan PS, Novak RM, Moorman AC, Tong TC, et al. Incidence of types of cancer among HIV-infected persons compared with the general population in the United States, 1992-2003. *Annals of internal medicine*. 2008;148(10):728-36. Epub 2008/05/21.
22. Voutsadakis IS, LR. Breast Cancer in HIV-Positive Women: A Report of Four Cases and Review of the Literature. *Cancer Investigation*. 2002;20(4):452-7.
23. Frisch M, Biggar, RJ., Engles, EA., & Goedert, JJ. Association of Cancer With AIDS-Related Immunosuppression in Adults. *Journal of American Medical Association*. 2001;285(13):1736-45.
24. Guth AA. Breast Cancer and HIV: What Do We Know? *The American Surgeon*. March 1999;65(3):209-11.
25. Simard EP, Pfeiffer RM, Engels EA. Cumulative incidence of cancer among individuals with acquired immunodeficiency syndrome in the United States. *Cancer*. 2011;117(5):1089-96. Epub 2010/10/21.
26. Connor M. Human immunodeficiency virus (HIV) and stroke: targets for intervention. *Infectious disorders drug targets*. 2010;10(2):76-83. Epub 2010/02/20.
27. Dobbs MR, Berger JR. Stroke in HIV infection and AIDS. *Expert review of cardiovascular therapy*. 2009;7(10):1263-71. Epub 2009/10/10.
28. Ovbiagele B, Nath A. Increasing incidence of ischemic stroke in patients with HIV infection. *Neurology*. 2011;76(5):444-50. Epub 2011/01/21.
29. Langhorne P, Stott DJ, Robertson L, MacDonald J, Jones L, McAlpine C, et al. Medical complications after stroke: a multicenter study. *Stroke; a journal of cerebral circulation*. 2000;31(6):1223-9. Epub 2000/06/03.
30. Calza L, Manfredi R, Pocaterra D, Chiodo F. Risk of premature atherosclerosis and ischemic heart disease associated with HIV infection and antiretroviral therapy. *The Journal of infection*. 2008;57(1):16-32. Epub 2008/03/25.
31. Johns K, Saeedi R, Mancini GB, Bondy G. Ankle brachial index screening for occult vascular disease is not useful in HIV-positive patients. *AIDS research and human retroviruses*. 2010;26(9):955-9. Epub 2010/08/20.
32. Barros ZM, de Alencar Ximenes RA, Miranda-Filho DB, de Albuquerque Mde F, Melo HR, Carvalho EH, et al. Comparison between the Framingham and prospective cardiovascular of Munster scores for risk assessment of coronary heart disease in human immunodeficiency virus-positive patients in Pernambuco, Brazil. *Metabolic syndrome and related disorders*. 2010;8(6):489-97. Epub 2010/10/27.
33. Carr A, Grund B, Neuhaus J, El-Sadr WM, Grandits G, Gibert C, et al. Asymptomatic myocardial ischaemia in HIV-infected adults. *Aids*. 2008;22(2):257-67. Epub 2007/12/22.
34. Gardner LI, Klein RS, Szczech LA, Phelps RM, Tashima K, Rompalo AM, et al. Rates and risk factors for condition-specific hospitalizations in HIV-infected and uninfected women. *J Acquir Immune Defic Syndr*. 2003;34(3):320-30. Epub 2003/11/06.

## Evidence-Informed Recommendations in Rehabilitation for Older Adults Living HIV

35. Shippy RA, Mendez D, Jones K, Cerngul I, Karpiak SE. S-adenosylmethionine (SAM-e) for the treatment of depression in people living with HIV/AIDS. *BMC psychiatry*. 2004;4:38. Epub 2004/11/13.
36. Heckman TG, Heckman BD, Kochman A, Sikkema KJ, Suhr J, Goodkin K. Psychological symptoms among persons 50 years of age and older living with HIV disease. *Aging & mental health*. 2002;6(2):121-8. Epub 2002/05/25.
37. Cherner M, Ellis RJ, Lazzaretto D, Young C, Mindt MR, Atkinson JH, et al. Effects of HIV-1 infection and aging on neurobehavioral functioning: preliminary findings. *Aids*. 2004;18 Suppl 1:S27-34. Epub 2004/04/13.
38. Thames AD, Becker BW, Marcotte TD, Hines LJ, Foley JM, Ramezani A, et al. Depression, cognition, and self-appraisal of functional abilities in HIV: an examination of subjective appraisal versus objective performance. *The Clinical neuropsychologist*. 2011;25(2):224-43. Epub 2011/02/19.
39. Grov C, Golub SA, Parsons JT, Brennan M, Karpiak SE. Loneliness and HIV-related stigma explain depression among older HIV-positive adults. *AIDS Care*. 2010;22(5):630-9. Epub 2010/04/20.
40. Meadows J, Le Marchal K, Catalan J. Mental health problems in older adults with HIV referred to a psychological medicine unit. *AIDS Care*. 1998;10 Suppl 2:S105-12. Epub 1998/09/23.
41. Applebaum AJ, Otto MW, Richardson MA, Safren SA. Contributors to neuropsychological impairment in HIV-infected and HIV-uninfected opiate-dependent patients. *Journal of clinical and experimental neuropsychology*. 2010;32(6):579-89. Epub 2009/11/06.
42. Atkins JH, Rubenstein SL, Sota TL, Rueda S, Fenta H, Bacon J, et al. Impact of social support on cognitive symptom burden in HIV/AIDS. *AIDS Care*. 2010;22(7):793-802. Epub 2010/07/17.
43. Antinori A, Arendt G, Becker JT, Brew BJ, Byrd DA, Cherner M, et al. Updated research nosology for HIV-associated neurocognitive disorders. *Neurology*. 2007;69(18):1789-99. Epub 2007/10/05.
44. Cysique LA, Bain MP, Brew BJ, Murray JM. The burden of HIV-associated neurocognitive impairment in Australia and its estimates for the future. *Sexual health*. 2011;8(4):541-50. Epub 2011/12/01.
45. McArthur JC, Sacktor N, Selnes O. Human immunodeficiency virus-associated dementia. *Seminars in neurology*. 1999;19(2):129-50. Epub 2000/03/16.
46. Valcour VG, Shikuma CM, Watters MR, Sacktor NC. Cognitive impairment in older HIV-1-seropositive individuals: prevalence and potential mechanisms. *Aids*. 2004;18 Suppl 1:S79-86. Epub 2004/04/13.
47. Hettige S, Samuel M, Clough C, Hulse N, Ashkan K. Deep brain stimulation for Parkinson's disease when HIV coexists. *Movement disorders : official journal of the Movement Disorder Society*. 2009;24(14):2169-71. Epub 2009/09/08.
48. Ragin AB, Storey P, Cohen BA, Edelman RR, Epstein LG. Disease burden in HIV-associated cognitive impairment: a study of whole-brain imaging measures. *Neurology*. 2004;63(12):2293-7. Epub 2004/12/30.
49. Vance DE, Struzick TC. Addressing risk factors of cognitive impairment in adults aging with HIV: a social work model. *Journal of gerontological social work*. 2007;49(4):51-77. Epub 2007/10/24.
50. Vance DE. Aging with HIV: clinical considerations for an emerging population. *The American journal of nursing*. 2010;110(3):42-7; quiz 8-9. Epub 2010/02/25.
51. Hardy DJ, Vance DE. The neuropsychology of HIV/AIDS in older adults. *Neuropsychology review*. 2009;19(2):263-72. Epub 2009/02/28.
52. Koutsilieri E, Sopper S, Scheller C, ter Meulen V, Riederer P. Parkinsonism in HIV dementia. *J Neural Transm*. 2002;109(5-6):767-75. Epub 2002/07/12.



**Evidence-Informed Recommendations in Rehabilitation for Older Adults Living HIV**

- 1  
2  
3 53. Coultas DB, Mapel D, Gagnon R, Lydick E. The health impact of undiagnosed airflow obstruction in a  
4 national sample of United States adults. *American journal of respiratory and critical care medicine*.  
5 2001;164(3):372-7. Epub 2001/08/14.  
6  
7 54. Crothers K, Butt AA, Gibert CL, Rodriguez-Barradas MC, Crystal S, Justice AC. Increased COPD  
8 among HIV-positive compared to HIV-negative veterans. *Chest*. 2006;130(5):1326-33. Epub  
9 2006/11/14.  
10 55. Visnegarwala F, Chen L, Raghavan S, Tedaldi E. Prevalence of diabetes mellitus and dyslipidemia  
11 among antiretroviral naive patients co-infected with hepatitis C virus (HCV) and HIV-1 compared to  
12 patients without co-infection. *The Journal of infection*. 2005;50(4):331-7. Epub 2005/04/23.  
13 56. Brar I, Shuter J, Thomas A, Daniels E, Absalon J. A comparison of factors associated with prevalent  
14 diabetes mellitus among HIV-Infected antiretroviral-naive individuals versus individuals in the  
15 National Health and Nutritional Examination Survey cohort. *J Acquir Immune Defic Syndr*.  
16 2007;45(1):66-71. Epub 2007/01/25.  
17 57. Butt AA, McGinnis K, Rodriguez-Barradas MC, Crystal S, Simberkoff M, Goetz MB, et al. HIV  
18 infection and the risk of diabetes mellitus. *Aids*. 2009;23(10):1227-34. Epub 2009/05/16.  
19  
20  
21  
22  
23  
24  
25  
26  
27  
28  
29  
30  
31  
32  
33  
34  
35  
36  
37  
38  
39  
40  
41  
42  
43  
44  
45  
46  
47  
48  
49  
50  
51  
52  
53  
54  
55

## Evidence-Informed Recommendations in Rehabilitation for Older Adults Living HIV

## References from which the Recommendations were derived (in alphabetical order)

Older HIV patients deal with the double stigma of having the disease and being old. Big worry: 'Will I get to see grandkids if I tell?'. *AIDS Alert*. 2007; 22(2): 16-17.

Ackerman, M. Religiosity and Biopsychosocial Outcomes in HIV: A SEM Comparison of Gender, Race, and Sexual Orientation. *Southern Online Journal of Nursing Research*. 2008; 8(4) at: [http://www.resourcenter.net/images/snrs/files/sojnr\\_articles2/Vol08Num04A.html#Ackerman](http://www.resourcenter.net/images/snrs/files/sojnr_articles2/Vol08Num04A.html#Ackerman).

Ada L, Dorsch S & Canning CG. Strengthening interventions increase strength and improve activity after stroke: a systematic review. *Australian Journal of Physiotherapy*. 2006; 52(4): 241-248.

Angevaren M, Aufdemkampe G, Verhaar HJJ, Aleman A & Vanhees L. Physical activity and enhanced fitness to improve cognitive function in older people without known cognitive impairment. *Cochrane Database of Systematic Reviews* 2008, Issue 3. Art. No.: CD005381. DOI: 10.1002/14651858.CD005381.pub3.

Arent SM, Landers DM & Etnier JL. The effects of exercise on mood in older adults: a meta-analytic review. *Journal of Aging and Physical Activity*. 2000; 8(4):407-430.

Ashworth NL, Chad KE, Harrison EL, Reeder BA & Marshall SC. Home versus center based physical activity programs in older adults. *Cochrane Database of Systematic Reviews* 2005, Issue 1. Art.No.: CD004017. DOI: 10.1002/14651858.CD004017.pub2.

Aziz NA, Leonardi-Bee J, Phillips MF, Gladman J, Legg LA & Walker M. Therapy-based rehabilitation services for patients living at home more than one year after stroke. *Cochrane Database of Systematic Reviews* 2008, Issue 2. Art. No.: CD005952. DOI: 10.1002/14651858.CD005952.pub2.

Baker MK, Atlantis E & Fiatarone Singh MA. Multi-modal exercise programs for older adults: systematic review. *Age and Ageing*. 2007; 36(4): 375–381. DOI:10.1093/ageing/afm054

Bachmann S, Finger C, Huss A, Egger M, Stuck AE & Clough-Gorr KM. Inpatient rehabilitation specifically designed for geriatric patients: systematic review and meta-analysis of randomised controlled trials. *BMJ (Clinical research ed.)*. 2010; 340: c1718. DOI: <http://dx.doi.org/10.1136/bmj.c1718>.

Boulé NG, Kenny GP, Haddad E, Wells GA & Sigal RJ. Meta-analysis of the effect of structured exercise training on cardiorespiratory fitness in Type 2 diabetes mellitus. *Diabetologia*. 2003; 46(8):1071–1081.

Bowen A & Lincoln N. Cognitive rehabilitation for spatial neglect following stroke. *Cochrane Database of Systematic Reviews* 2007, Issue 2. Art. No.: CD003586. DOI: 10.1002/14651858.CD003586.pub2.

Brockow T, Markes M & Resch KL. Exercise for women receiving adjuvant therapy for breast cancer. *Cochrane Database of Systematic Reviews* 2006, Issue 4. Art. No.: CD005001. DOI: 10.1002/14651858.CD005001.pub2.

**Evidence-Informed Recommendations in Rehabilitation for Older Adults Living HIV**

1  
2  
3 Brown J, Huedo-Medina TB, Pescatello LS, Pescatello SM, Ferrer RA & Johnson BT. Efficacy of Exercise  
4 Interventions in Modulating Cancer-Related Fatigue among Adult Cancer Survivors: A Meta-Analysis. *Cancer*  
5 *Epidemiol Biomarkers Prev.* 2011; 20:123-133. DOI:10.1158/1055-9965.EPI-10-0988.

6  
7  
8 Chan DNS, Lui LYY & So WK. Effectiveness of exercise programmes on shoulder mobility and lymphoedema  
9 after axillary lymph node dissection for breast cancer: systematic review. *Journal of Advanced Nursing.*  
10 2010; 66(9): 1902-1914.

11  
12 Chavannes N, Vollenberg JJH, van Schayck CP & Wouters EFM. Effects of physical activity in mild to  
13 moderate COPD: a systematic review. *British Journal of General Practice.* 2002; 52(480): 574-578.

14  
15 Chesney MA, Chambers DB, Taylor JM & Johnson LM. Social support, distress, and well-being in older men  
16 living with HIV infection. *Journal of Acquired Immune Deficiency Syndromes: JAIDS.* 2003; 33 Suppl 2: S185-  
17 193.

18  
19  
20 Chien C-L, Lee CM Wu Y-W, Chen T-A & Wu Y-T. Home-based exercise increases exercise capacity but not  
21 quality of life in people with chronic heart failure: a systematic review. *Australian Journal of Physiotherapy.*  
22 2008; 54(2): 87-93.

23  
24  
25 Chudyk AM, Jutai JW, Petrella RJ & Speechley M. Systematic Review of Hip Fracture Rehabilitation Practices  
26 in the Elderly. *Archives of Physical Medicine and Rehabilitation.* 2009; 90(2): 246-262.

27  
28  
29 Clark AM, Hartling L, Vandermeer B & McAlister FA. Meta-analysis: Secondary prevention programs for  
30 patients with coronary artery. *Annals of Internal Medicine.* 2005; 143(9): 659-672. DOI: 10.7326/0003-  
31 4819-143-9-200511010-00010.

32  
33  
34 Cooke E, Mares K, Clark A, Tallis RC & Pomeroy VM. The effects of increased dose of exercise- based  
35 therapies to enhance motor recovery after stroke: a systematic review and meta-analysis. *BMC Medicine.*  
36 2010; 8:60. Available from: <http://www.biomedcentral.com/1741-7015/8/60>.

37  
38  
39 Craig LE, Bernhardt J, Langhorne P & Wu O. Early mobilization after stroke: an example of an individual  
40 patient data meta-analysis of a complex intervention. *Stroke.* 2010; 41(11): 2632-2636.

41  
42 Cramp F & Byron-Daniel J. Exercise for the management of cancer-related fatigue in adults. *Cochrane*  
43 *Database of Systematic Reviews* 2012, Issue 11. Art. No.: CD006145. DOI:  
44 10.1002/14651858.CD006145.pub3. Summary available from:  
45 <http://summaries.cochrane.org/CD006145/the-effect-of-exercise-on-fatigue-associated-with-cancer>

46  
47  
48 Cramp F & Daniel J. Exercise for the management of cancer-related fatigue in adults. *Cochrane Database of*  
49 *Systematic Reviews* 2008, Issue 2. Art. No.: CD006145. DOI: 10.1002/14651858.CD006145.pub2. Available  
50 from: <http://summaries.cochrane.org/CD006145/the-effect-of-exercise-on-fatigue-associated-with-cancer>.

## Evidence-Informed Recommendations in Rehabilitation for Older Adults Living HIV

1  
2  
3 Crotty M, Unroe K, Cameron ID, Miller M, Ramirez G & Couzner L. Rehabilitation interventions for  
4 improving physical and psychosocial functioning after hip fracture in older people. Cochrane database of  
5 systematic reviews 2010, DOI: 10.1002/14651858.CD007624.pub3. Available from:  
6 [http://summaries.cochrane.org/CD007624/rehabilitation-interventions-for-improving-physical- and-  
8 psychosocial-functioning-after-hip-fracture-in-older-people](http://summaries.cochrane.org/CD007624/rehabilitation-interventions-for-improving-physical-and-<br/>7 psychosocial-functioning-after-hip-fracture-in-older-people)  
9

10 dasNair R & Lincoln N. Cognitive rehabilitation for memory deficits following stroke. *Cochrane Database of*  
11 *Systematic Reviews* 2007, Issue 3. Art. No.: CD002293. DOI: 10.1002/14651858.CD002293.pub2.  
12

13 Davies P, Taylor F, Beswick A, Wise F, Moxham T, Rees K & Ebrahim S. Promoting patient uptake and  
14 adherence in cardiac rehabilitation. *Cochrane Database of Systematic Reviews* 2010, Issue  
15 7. Art. No.: CD007131. DOI: 10.1002/14651858.CD007131.pub2.  
16

17 Davies EJ, Moxham T, Rees K, Singh S, Coats AJS, Ebrahim S, Lough F & Taylor RS. Exercise based  
18 rehabilitation for heart failure. *Cochrane Database of Systematic Reviews* 2010, Issue 4. Art. No.:  
19 CD003331. DOI: 10.1002/14651858.CD003331.pub3.  
20

21 Draper B & Low L-F. What is the effectiveness of acute hospital treatment of older people with mental  
22 disorders? *International Psychogeriatrics*. 2005; 17(4): 539-555.  
23

24 de Kam D, Smulders E, Weerdesteyn V & Smits-Engelsman BC. Exercise interventions to reduce fall-related  
25 fractures and their risk factors in individuals with low bone density: a systematic review of randomized  
26 controlled trials. *Osteoporosis International*. 2009; 20(12): 2111-212. DOI: 10.1007/s00198-009-0938-6.  
27

28 de Morton N, Keating JL & Jeffs K. Exercise for acutely hospitalised older medical patients. *Cochrane*  
29 *Database of Systematic Reviews* 2007, Issue 1. Art. No.: CD005955. DOI:  
30 10.1002/14651858.CD005955.pub2.  
31

32 de Souza PML, Filho WJ, Santarem JM, da Silva AR, Li HY & Burattini MN. Progressive resistance training on  
33 elderly HIV+ patients: Does it work? *American Journal of Infectious Diseases*. 2008; 4(4): 215-219.  
34

35 Emler CA. An examination of the social networks and social isolation in older and younger adults living with  
36 HIV/AIDS. *Health & Social Work*. 2006; 31(4): 299-308.  
37

38 Emler CA. HIV/AIDS and Aging: A Diverse Population of Vulnerable Older Adults. *Journal of Human Behavior*  
39 *in the Social Environment*. 2004; 9(4): 45-63.  
40

41 Emler CA & Farkas KJ. A descriptive analysis of older adults with HIV/AIDS in California. *Health & Social*  
42 *Work*. 2001; 26(4): 226-234.  
43

44 English C & Hillier S. Circuit class therapy for improving mobility after stroke: a systematic review. *J Rehabil*  
45 *Med*. 2011; 43: 565-571.  
46

47 Evans WJ, Roubenoff R & Shevitz A. Exercise and the treatment of wasting: aging and human  
48 immunodeficiency virus infection. *Seminars in Oncology*. 1998; 25(2 Suppl 6): 112-122.  
49

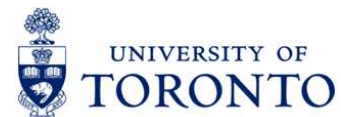

**Evidence-Informed Recommendations in Rehabilitation for Older Adults Living HIV**

1  
2  
3 Forbes D, Forbes S, Morgan DG, Markle-Reid M, Wood J & Culum I. Physical activity programs for persons  
4 with dementia. *Cochrane Database of Systematic Reviews* 2008, Issue 3. Art. No.: CD006489. DOI:  
5 10.1002/14651858.CD006489.pub2.  
6

7  
8 Fransen M & McConnell S. Exercise for osteoarthritis of the knee. *Cochrane Database of Systematic*  
9 *Reviews* 2008, Issue 4. Art. No.: CD004376. DOI: 10.1002/14651858.CD004376.pub2. Available from:  
10 <http://onlinelibrary.wiley.com/doi/10.1002/14651858.CD004376.pub2/pdf>  
11

12 Fransen M & McConnell S, Hernandez-Molina G, Reichenbach S. Exercise for osteoarthritis of the hip.  
13 *Cochrane Database of Systematic Reviews* 2009, Issue 3. Art. No.: CD007912. DOI:  
14 10.1002/14651858.CD007912. Available from:  
15 <http://onlinelibrary.wiley.com/doi/10.1002/14651858.CD007912/full>  
16

17  
18 French B, Thomas L, Leathley M, Sutton C, McAdam J, Forster A, Langhorne P, Price C, Walker A & Watkins  
19 C. Does repetitive task training improve functional activity after stroke? A Cochrane systematic review and  
20 meta-analysis. *J Rehabil Med.* 2010; 42: 9–14  
21

22  
23 Geddes, E. L., O'Brien K, W. D. Reid, Brooks D & Crowe J. Inspiratory muscle training in adults with chronic  
24 obstructive pulmonary disease: a systematic review. *Respiratory Medicine.* 2008; 99(11): 1440-1458. DOI of  
25 original article: 10.1016/j.rmed.2008.07.005.  
26

27  
28 Glanz M, Klawansky S, Stason W, Berkey C & Chalmers TC. Functional electrostimulation in poststroke  
29 rehabilitation: a meta-analysis of the randomized controlled trials. *Archives of Physical Medicine &*  
30 *Rehabilitation.* 1996; 77(6): 549-553.  
31

32  
33 Grov C, Golub SA, Parsons JT, Brennan M & Karpiak SE. Loneliness and HIV-related stigma explain  
34 depression among older HIV-positive adults. *AIDS Care - Psychological and Socio-Medical Aspects* of  
35 *AIDS/HIV.* 2010; 22(5): 630-639.  
36

37  
38 Gu MO & Conn VS. Meta-analysis of the effects of exercise interventions on functional status in older  
39 adults. *Research in Nursing & Health.* 2008; 31(6): 594–603 [Published online 10 June 2008 in Wiley  
40 *InterScience*]. DOI: 10.1002/nur.20290.  
41

42  
43 Gutheil IA & Chichin ER. AIDS, older people, and social work. *Health & Social Work.* 1991; 16(4): 237-244.  
44 Halbert J, Crotty M, Whitehead C, Cameron I, Kurrle S, Graham S, Handoll H, Finnegan T, Jones T, Foley A &  
45 Shanahan M. Multi-disciplinary rehabilitation after hip fracture is associated with improved outcome: A  
46 systematic review. *Journal of Rehabilitation Medicine.* 2007; 39(7): 507-512.  
47

48  
49 Halbert JA, Silagy CA, Finucane P, Withers RT & Hamdorf PA. Exercise training and blood lipids in  
50 hyperlipidemic and normolipidemic adults: a meta-analysis of randomized, controlled trials. *European*  
51 *Journal of Clinical Nutrition.* 1999; 53(7): 514-522.  
52

53  
54 Halbert JA, Silagy CA, Finucane P, Withers RT, Hamdorf PA & Andrews GR. The effectiveness of exercise  
55 training in lowering blood pressure: a meta-analysis of randomised controlled trials of 4 weeks or longer.  
56 *Journal of Human Hypertension.* 1997; 11(10): 641-649.  
57



## Evidence-Informed Recommendations in Rehabilitation for Older Adults Living HIV

1  
2  
3 Handoll HHG, Cameron ID, Mak JCS, & Finnegan TP. Multidisciplinary rehabilitation for older people with  
4 hip fractures. *Cochrane Database of Systematic Reviews* 2009, Issue 4. Art. No.: CD007125. DOI:  
5 10.1002/14651858.CD007125.pub2. Available from:

6 [http://summaries.cochrane.org/CD007125/multidisciplinary-rehabilitation-of-older-patients-with-hip-](http://summaries.cochrane.org/CD007125/multidisciplinary-rehabilitation-of-older-patients-with-hip-fractures)  
7 [fractures.](http://summaries.cochrane.org/CD007125/multidisciplinary-rehabilitation-of-older-patients-with-hip-fractures)

8  
9  
10 Handoll HH, Sherrington C & Parker MJ. Mobilisation strategies after hip fracture surgery in adults.  
11 *Cochrane database of systematic reviews* 2004, Issue 1: 1-94. DOI: 10.1002/14651858.CD001704.pub3.  
12 Available from: <http://onlinelibrary.wiley.com/doi/10.1002/14651858.CD001704.pub4/full>.

13  
14 Hauer K, Becker C, Lindemann U & Beyer N. Effectiveness of physical training on motor performance and  
15 fall prevention in cognitively impaired older persons: A systematic review. *American Journal of Physical*  
16 *Medicine and Rehabilitation*. 2006; 85(10): 847-857.

17  
18  
19 Haykowsky M, Clark AM, Liang Y, Pechter D, Jones LW & McAlister FA. A meta-analysis of the effect of  
20 exercise training on left ventricular remodeling in heart failure patients: The benefit depends on the type of  
21 training performed. *ACC Cardiosource Review Journal*. 2007; 16(10): 33- 37.

22  
23  
24 Heckman TG, Barcikowski R, Ogles B, Suhr J, Carlson B, Holroyd K & Garske J. A Telephone-Delivered Coping  
25 Improvement Group Intervention for Middle-Aged and Older Adults Living With HIV/AIDS. *Annals of*  
26 *Behavioral Medicine*. 2006; 32(1): 27-38.\*

27  
28  
29 Heckman TG, Heckman BD, Kochman A, Sikkema KJ, Suhr J & Goodkin K. Psychological symptoms among  
30 persons 50 years of age and older living with HIV disease. *Aging & Mental Health*. 2002; 6(2): 121-128.

31  
32 Heckman TG, Kochman A, Sikkema KJ, Kalichman SC, Masten J, Bergholte J & Catz S. A pilot coping  
33 improvement intervention for late middle-aged and older adults living with HIV/AIDS in the USA. *AIDS Care*.  
34 2001; 13(1): 129-139.\*

35  
36  
37 Heckman TG, Kochman A, Sikkema KJ, Kalichman SC, Masten J & Goodkin K. Late middle-aged and older  
38 men living with HIV/AIDS: race differences in coping, social support, and psychological distress. *Journal of*  
39 *the National Medical Association*. 2000; 92(9): 436-444.

40  
41 Heckman TG, Kochman A & Sikkema KJ. Depressive symptoms in older adults living with HIV disease:  
42 Application of the Chronic Illness Quality of Life Model. *Journal of Mental Health and Aging*. 2002; 8(4): 267-  
43 279.

44  
45  
46 Heckman TG, Kochman A, Sikkema KJ & Kalichman SC. Depressive symptomatology, daily stressors, and  
47 ways of coping among middle-age and older adults living with HIV disease. *Journal of Mental Health and*  
48 *Aging*. 1999; 5(4): 311-322.

49  
50 Herkner H, Thoennissen J, Nikfardjam M, Koreny M, Laggner AN & Mullner M. Short versus prolonged bed  
51 rest after uncomplicated acute myocardial infarction: a systematic review and meta-analysis. *Journal of*  
52 *Clinical Epidemiology*. 2003; 56(8): 775-781.

**Evidence-Informed Recommendations in Rehabilitation for Older Adults Living HIV**

1  
2  
3 Herring MP, O'Connor PJ & Dishman RK. The effect of exercise training on anxiety symptoms among  
4 patients: a systematic review. *Archives of Internal Medicine*. 2010; 170(4): 321-331.

5  
6 Heyn P, Abreu BC & Ottenbacher KJ. The effects of exercise training on elderly persons with cognitive  
7 impairment and dementia: a meta-analysis. *Archives of Physical Medicine & Rehabilitation*. 2004; 85(10):  
8 1694-1704.

9  
10 Heyn PC, Johnson KE & Kramer AF. Endurance and strength training outcomes on cognitively impaired and  
11 cognitively intact older adults: a meta-analysis. *Journal of Nutrition, Health & Aging*. 2008; 12(6): 401-409.

12  
13 Hillman JL & Stricker G. Some issues in the assessment of HIV among older adult patients. *Psychotherapy*.  
14 1998; 35 (4): 483-489.

15  
16 Hines ME. Commentary on "biopsychosocial benefits of spirituality in adults aging with HIV: implications for  
17 nursing practice and research". New challenges for providing spiritual care in aging patients with HIV.  
18 *Journal of Holistic Nursing*. 2008; 26(2): 126-127.

19  
20 Hoffmann T, Bennett S, Koh CL & McKenna KT. Occupational therapy for cognitive impairment in stroke  
21 patients. *Cochrane Database of Systematic Reviews* 2010, Issue 9. Art. No.: CD006430. DOI:  
22 10.1002/14651858.CD006430.pub2.

23  
24 Howe TE, Rochester L, Jackson A, Banks PMH & Blair VA. Exercise for improving balance in older people.  
25 *Cochrane Database of Systematic Reviews* 2007, Issue 4. Art. No.: CD004963. DOI:  
26 10.1002/14651858.CD004963.pub2.

27  
28 Huang G, Gibson CA, Tran ZV & Osness WH. Controlled endurance exercise training and VO2max changes in  
29 older adults: a meta-analysis. *Preventive Cardiology*. 2005; 8(4): 217-225.

30  
31 Ingram C, Courneya KS & Kingston D. The Effects of Exercise on Body Weight and Composition in Breast  
32 Cancer Survivors: An Integrative Systematic Review. *Oncology Nursing Forum*. 2006; 33(5): 937.

33  
34 Jean L, Bergeron ME, Thivierge S & Simard M. Cognitive intervention programs for individuals with mild  
35 cognitive impairment: Systematic review of the literature. *American Journal of Geriatric Psychiatry*. 2010;  
36 18(4): 281-296.

37  
38 Jolliffe J, Rees K, Taylor RRS, Thompson DR, Oldridge N & Ebrahim S. Exercise-based rehabilitation for  
39 coronary heart disease. *Cochrane Database of Systematic Reviews* 2001, Issue 1. Art. No.: CD001800. DOI:  
40 10.1002/14651858.CD001800.

41  
42 Kalichman SC, Heckman T, Kochman A, Sikkema K & Bergholte J. Depression and thoughts of suicide among  
43 middle-aged and older persons living with HIV-AIDS. *Psychiatric Services*. 2000; 51(7): 903-907.

44  
45 Kessels RPC & Haan EHF. Implicit Learning in Memory Rehabilitation: A Meta- Analysis on Errorless  
46 Learning and Vanishing Cues Methods', *Journal of Clinical and Experimental Neuropsychology*. 2003; 25(6),  
47 805-814. DOI: 10.1076/jcen.25.6.805.16474.



**Evidence-Informed Recommendations in Rehabilitation for Older Adults Living HIV**

1  
2  
3 Keigher SM, Stevens PE & Plach SK. Midlife women with HIV: health, social, and economic factors shaping  
4 their futures. *Journal of HIV/AIDS & Social Services*. 2004; 3(1): 43-58.

5  
6  
7 Kim CJ, Kang DH & Park JW. A Meta-Analysis of Aerobic Exercise Interventions for Women With Breast  
8 Cancer. *Western Journal of Nursing Research*. 2009; 31(4): 437-461.

9  
10 Knols R, Aaronson NK, Uebelhart D, Fransen J & Aufdemkampe D. Physical Exercise in Cancer Patients  
11 During and After Medical Treatment: A Systematic Review of Randomized and Controlled Clinical Trials. *J*  
12 *Clin Oncol*. 2005; 23(16): 3830-3842.

13  
14 Kottink AI, Oostendorp LJ, Buurke JH, Nene AV, Hermens HJ & IJzerman MJ. The orthotic effect of functional  
15 electrical stimulation on the improvement of walking in stroke patients with a dropped foot: a systematic  
16 review. *Artificial Organs*. 2004; 28(6): 577-586.

17  
18  
19 Kwakkel G, van Peppen R, Wagenaar RC, Wood Dauphinee S, Richards C, Ashburn A, Miller K, Lincoln N,  
20 Partridge C, Wellwood I & Langhorne P. Effects of augmented exercise therapy time after stroke: A meta-  
21 analysis. *Stroke*. 2004; 35(11):2529-2539. Originally published online October 7, 2004. DOI:  
22 10.1161/01.STR.0000143153.76460.7d.

23  
24  
25 Lacasse Y, Goldstein R, Lasserson TJ & Martin S. Pulmonary rehabilitation for chronic obstructive pulmonary  
26 disease. *Cochrane Database of Systematic Reviews* 2006, Issue 4. Art. No.: CD003793. DOI:  
27 10.1002/14651858.CD003793.pub2.

28  
29  
30 Langhorne P & Widen-Holmqvist L. Early supported discharge after stroke. *Journal of Rehabilitation*  
31 *Medicine*. 2007; 39: 103-108. DOI: 10.2340/16501977-0042.

32  
33 Lee MM & Camp CJ. Clinical comments. Spaced retrieval: a memory intervention for HIV+ older adults.  
34 *Clinical Gerontologist*. 2001; 22(3/4): 131-135.\*

35  
36  
37 Leff HS, Chow CM, Pepin R, Conley J, Allen IE & Seaman CA. Does one size fit all? What we can and can't  
38 learn from a meta-analysis of housing models for persons with mental illness. *Psychiatric Services*. 2009;  
39 60(4): 473-482.

40  
41 Legg L, Langhorne P & Outpatient Service Trialists. Rehabilitation therapy services for stroke patients living  
42 at home: systematic review of randomised trials. *Lancet*. 2004; 363(9406): 352-356.

43  
44  
45 Legg L, Drummond A, Leonardi-Bee J, Gladman JRF, Corr S, Donkervoort M, Edmans J, Gilbertson L,  
46 Jongbloed L, Logan P, Sackley C, Walker M & Langhorne P. Occupational therapy for patients with problems  
47 in personal activities of daily living after stroke: systematic review of randomised trials. *BMJ*. 2007;  
48 335(7626): 922.

49  
50 Lloyd-Williams F, Mair FS & Leitner M. Exercise training and heart failure: a systematic review of current  
51 evidence. *British Journal of General Practice*. 2002; 52(474): 47-55.

52  
53  
54 Lotters F, van Tol B, Kwakkel G & Gosselink R. Effects of controlled inspiratory muscle training in patients  
55 with COPD: A meta-analysis. *European Respiratory Journal*. 2002; 20(3): 570-576.

**Evidence-Informed Recommendations in Rehabilitation for Older Adults Living HIV**

1  
2  
3 Liu CJ & Latham NK. Progressive resistance strength training for improving physical function in older  
4 adults. *Cochrane Database of Systematic Reviews* 2009, Issue 3. Art. No.: CD002759. DOI:  
5 10.1002/14651858.CD002759.pub2  
6

7  
8 Malone MA. HIV-positive women over fifty: how they cope. *AIDS Patient Care & Stds.* 1998; 12(8): 639-643.  
9

10 Martyn-St James M & Carroll S. A meta-analysis of impact exercise on postmenopausal bone loss: The case  
11 for mixed loading exercise programmes. *Br J Sports Med.* 2009 43(12): 898-908. Originally published online  
12 November 3, 2008. DOI: 10.1136/bjism.2008.052704. Available at:  
13 <http://bjisportmed.com/content/43/12/898.abstract>.  
14

15 Mavandadi S, Zanjani F, Ten Have TR & Oslin DW. Psychological well-being among individuals aging with  
16 HIV: the value of social relationships. *Journal of Acquired Immune Deficiency Syndromes: JAIDS.* 2009;  
17 51(1): 91-98.  
18

19  
20 McNeely ML, Campbell K, Ospina M, Rowe BH, Dabbs K, Klassen TP, Mackey J & Courneya K. Exercise  
21 interventions for upper-limb dysfunction due to breast cancer treatment. *Cochrane Database of Systematic*  
22 *Reviews* 2010, Issue 6. Art. No.: CD005211. DOI: 10.1002/14651858.CD005211.pub2.  
23

24  
25 McNeely ML, Campbell K, Ospina M, Rowe BH, Dabbs K, Klassen TP, Mackey J & Courneya K. Exercise  
26 interventions for upper-limb dysfunction due to breast cancer treatment. *CMAJ.* 2006; 175(1):34-41.  
27 DOI:10.1503/cmaj.051073.  
28

29  
30 Meek C, Pollock A, Potter J & Langhorne P. A systematic review of exercise trials post stroke. *Clinical*  
31 *Rehabilitation.* 2003; 17(1): 6-13.  
32

33 Mehrholz J, Werner C, Kugler J & Pohl M. Electromechanical-assisted training for walking after stroke.  
34 *Cochrane Database of Systematic Reviews* 2007, Issue 4. Art. No.: CD006185. DOI:  
35 10.1002/14651858.CD006185.pub2.  
36

37  
38 Moreland J & Thomson MA. Efficacy of electromyographic biofeedback compared with conventional  
39 physical therapy for upper-extremity function in patients following stroke: a research overview and meta-  
40 analysis. *Physical Therapy.* 1994; 74(6): 534-54.  
41

42 Moseley AM, Stark A, Cameron ID & Pollock A. Treadmill training and body weight support for walking after  
43 stroke. *Cochrane Database of Systematic Reviews* 2005, Issue 4. Art. No.: CD002840. DOI:  
44 10.1002/14651858.CD002840.pub2.  
45

46  
47 Mullen PD, Mains DA & Velez R. A meta-analysis of controlled trials of cardiac patient education. *Patient*  
48 *Education & Counseling.* 1992; 19(2): 143-162. DOI: [10.1016/0738-3991\(92\)90194-N](https://doi.org/10.1016/0738-3991(92)90194-N).  
49

50 Netz Y, Wu M-J, Becker BJ, & Tenebaum G. Physical activity and psychological well-being in advanced age: A  
51 meta-analysis of intervention studies. *Psychology and Aging.* 2005; 20(2): 272-284. DOI: 10.1037/0882-  
52 7974.20.2.272.  
53  
54  
55

**Evidence-Informed Recommendations in Rehabilitation for Older Adults Living HIV**

1  
2  
3 Neundorfer MM, Camp CJ, Lee MM, Skrajner MJ, Malone ML & Carr JR. Compensating for cognitive deficits  
4 in persons aged 50 and over with HIV/AIDS, *Journal of HIV/AIDS & Social Services*. 2004; 3(1): 79-97.

5  
6  
7 Nielsen PJ, Hafdahl AR, Conn VS, LeMaster JW & Brown SA. Meta-analysis of the effect of exercise  
8 interventions on fitness outcomes among adults with type 1 and type 2 diabetes. *Diabetes Research &*  
9 *Clinical Practice*. 2006; 74(2): 111-120.

10  
11 Nokes KM, Chew L & Altman C. Using a telephone support group for HIV-positive persons aged 50+ to  
12 increase social support and health-related knowledge. *AIDS Patient Care & Stds*. 2003; 17(7): 345-351.\*

13  
14 O'Brien K, Nixon S, Tynan AM & Glazier R. Aerobic exercise interventions for adults living with HIV/AIDS.  
15 *Cochrane Database of Systematic Reviews* 2010, Issue 8. Art. No.: CD001796. DOI:  
16 10.1002/14651858.CD001796.pub3.

17  
18  
19 O'Brien K, Tynan AM, Nixon S & Glazier RH. Effects of progressive resistive exercise in adults living with  
20 HIV/AIDS: systematic review and meta-analysis of randomized trials. *AIDS Care*. 2008; 20(6): 631-653.  
21 Available from: <http://dx.doi.org/10.1080/09540120701661708>.

22  
23  
24 Oh H & Seo W. Meta-analysis of the effects of respiratory rehabilitation programmes on exercise capacity in  
25 accordance with programme characteristics. *Journal of Clinical Nursing*. 2007; 16(1): 3- 15.

26  
27 O'Shea SD, Taylor NF & Paratz JD. Progressive resistance exercise improves muscle strength and may  
28 improve elements of performance of daily activities for people with COPD: A systematic review. *Chest*.  
29 2009; 136(5): 1269-1283. Prepublished online September 4, 2009. DOI: 10.1378/chest.09-0029. Available  
30 from: <http://chestjournal.chestpubs.org/content/136/5/1269.full.html>.

31  
32  
33 Ottawa Panel. Ottawa Panel Evidence-Based Clinical Practice Guidelines for Post-Stroke Rehabilitation. *Top*  
34 *Stroke Rehabil*. 2006; 13(2):1-269

35  
36  
37 Oursler KK, Katzel LI, Smith BA, Scott WB, Russ DW & Sorkin JD. Prediction of cardiorespiratory fitness in  
38 older men infected with the human immunodeficiency virus: clinical factors and value of the six-minute  
39 walk distance. *Journal of the American Geriatrics Society*. 2009; 57(11): 2055-2061

40  
41 Oursler KK, Sorkin JD, Smith BA & Katzel LI. Reduced aerobic capacity and physical functioning in older HIV  
42 infected men. *AIDS Research & Human Retroviruses*. 2006; 22(11): 1113-1121.

43  
44  
45 Pang MYC, Eng JJ, Dawson AS & Gylfadottir S. The use of aerobic exercise training in improving aerobic  
46 capacity in individuals with stroke: a meta-analysis. *Clinical Rehabilitation*. 2006; 20(2): 97-111.

47  
48  
49 Park NW & Ingles JL. Effectiveness of attention rehabilitation after an acquired brain injury: a meta-analysis.  
50 *Neuropsychology*. 2001; 15(2): 199-210.

51  
52  
53 Plach SK, Stevens PE & Keigher S. Self-care of women growing older with HIV and/or AIDS. *Western Journal*  
54 *of Nursing Research*. 2005; 27(5): 534-553.

**Evidence-Informed Recommendations in Rehabilitation for Older Adults Living HIV**

- 1  
2  
3 Pitts M, Grierson J & Misson S. Growing older with HIV: a study of health, social and economic  
4 circumstances for people Living with HIV in Australia over the age of 50 years. *AIDS Patient Care & Stds.*  
5 2005; 19(7): 460-465.  
6  
7  
8 Poindexter CC. Six champions speak about being over 50 and living with HIV. *Journal of HIV/AIDS & Social*  
9 *Services.* 2004; 3(1): 99-117.  
10  
11 Poindexter C & Shippy RA. Networks of older New Yorkers with HIV: fragility, resilience, and transformation.  
12 *AIDS Patient Care & Stds.* 2008; 22(9): 723-733.  
13  
14 Pollock A, Baer G, Langhorne P & Pomeroy V. Physiotherapy treatment approaches for the recovery of  
15 postural control and lower limb function following stroke: a systematic review. *Clinical Rehabilitation.* 2007;  
16 21(5): 395-410.  
17  
18  
19 Puhan MA, Gimeno-Santos E, Scharplatz M, Troosters T, Walters EH & Steurer J. Pulmonary rehabilitation  
20 following exacerbations of chronic obstructive pulmonary disease. *Cochrane Database of Systematic*  
21 *Reviews* 2009, Issue 1. Art. No.: CD005305. DOI: 10.1002/14651858.CD005305.pub2.  
22  
23  
24 Robinson L, Hutchings D, Dickinson HO, Corner L, Beyer F, Finch T, Hughes J, Vanoli A, Ballard C & Bond J.  
25 Effectiveness and acceptability of non-pharmacological interventions to reduce wandering in dementia: a  
26 systematic review. *International Journal of Geriatric Psychiatry.* 2007; 22(1): 9-22.  
27  
28  
29 Saunders DH, Greig CA, Mead GE & Young A. Physical fitness training for stroke patients. *Cochrane*  
30 *Database of Systematic Reviews* 2009, Issue 4. Art. No.:CD003316. DOI:10.1002/14651858.CD003316.pub3.  
31  
32 Schabrun SM & Hillier S. Evidence for the retraining of sensation after stroke: a systematic review. *Clinical*  
33 *Rehabilitation.* 2009; 23: 27-39  
34  
35 Schrimshaw EW & Siegel K. Perceived barriers to social support from family and friends among older adults  
36 with HIV/AIDS. *Journal of Health Psychology.* 2003; 8(6): 738-752.  
37  
38  
39 Senior K. Growing old with HIV. *The Lancet Infectious Diseases.* 2005; 5(12): 739.  
40  
41 Siegel K, Dean L & Schrimshaw EW. Symptom ambiguity among late-middle-aged and older adults with HIV.  
42 *Research on Aging.* 1999; 21(4): 595-618.  
43  
44  
45 Sjosten N & Kivela SL. The effects of physical exercise on depressive symptoms among the aged: a  
46 systematic review. *International Journal of Geriatric Psychiatry.* 2006; 21(5): 410-418.  
47  
48 Shippy RA. Taking care of each other. GMHC treatment issues : the Gay Men's Health Crisis newsletter of  
49 experimental AIDS therapies. 2007; 21(2): 7-8.  
50  
51 Shippy R & Karpiak SE. Perceptions of Support Among Older Adults With HIV. *Research on Aging.* 2005;  
52 27(3): 290-306.  
53  
54  
55  
56  
57  
58  
59  
60

## Evidence-Informed Recommendations in Rehabilitation for Older Adults Living HIV

1  
2  
3 Shippy RA & Karpiak SE. The aging HIV/AIDS population: fragile social networks. *Aging & Mental Health*.  
4 2005; 9(3): 246-254.

5  
6  
7 Smart N & Marwick TH. Exercise training for patients with heart failure: a systematic review of factors  
8 that improve mortality and morbidity. *American Journal of Medicine*. 2004; 116(10): 693-706.

9  
10 Smith PJ, Blumenthal JA, Hoffman BM, Cooper H, Strauman TA, Welsh-Bohmer K, Browndyke JN &  
11 Sherwood A. Aerobic Exercise and Neurocognitive Performance: A Meta-Analytic Review of Randomized  
12 Controlled Trials. *Psychosomatic Medicine*. 2010; 72(3): 239–252. DOI: 10.1097/PSY.0b013e3181d14633.

13  
14  
15 Snowling NJ & Hopkins WG. Effects of Different Modes of Exercise Training on Glucose Control and Risk  
16 Factors for Complications in Type 2 Diabetic Patients. *Diabetes Care*. 2006; 29(11): 2518-27. Available from:  
17 <http://care.diabetesjournals.org/content/29/11/2518.full?sid=1c88f8f9-d4c9-4a13-9063-8613e7129ab5>.

18  
19 Solà I, Thompson EM, Subirana Casacuberta M, Lopez C & Pascual A. Non-invasive interventions for  
20 improving well-being and quality of life in patients with lung cancer. *Cochrane Database of Systematic*  
21 *Reviews* 2004, Issue 4. Art. No.: CD004282. DOI: 10.1002/14651858.CD004282.pub2.

22  
23  
24 Spence RR, Heesch KC & Brown WJ. Exercise and cancer rehabilitation: A systematic review. *Cancer*  
25 *Treatment Reviews*. 2010; 36 (2) 185–194. DOI: 10.1016/j.ctrv.2009.11.003.

26  
27  
28 States RA, Pappas E & Salem Y. Overground physical therapy gait training for chronic stroke patients with  
29 mobility deficits. *Cochrane Database of Systematic Reviews* 2009, Issue 3. Art. No.: CD006075. DOI:  
30 10.1002/14651858.CD006075.pub2.

31  
32 Steultjens EM, Dekker J, Bouter LM, Jellema S, Bakker EB & van den Ende CH. Occupational therapy for  
33 community dwelling elderly people: a systematic review. *Age & Ageing*. 2004; 33(5): 453-460.

34  
35  
36 Tambalis K, Panagiotakos DB, Kavouras SA & Sidossis LS. Responses of blood lipids to aerobic, resistance,  
37 and combined aerobic with resistance exercise training: A systematic review of current evidence.  
38 *ANGIOLOGY* 2009 60: 614. Originally published online 30 October 2008. Available from:  
39 <http://ang.sagepub.com/content/60/5/614>.

40  
41 Taylor RS, Dalal H, Jolly K, Moxham T & Zawada A. Home-based versus centre-based cardiac rehabilitation.  
42 *Cochrane Database of Systematic Reviews* 2010, Issue 1. Art. No.: CD007130. DOI:  
43 10.1002/14651858.CD007130.pub2.

44  
45  
46 Thomas D, Elliott EJ & Naughton GA. Exercise for type 2 diabetes mellitus. *Cochrane Database of Systematic*  
47 *Reviews* 2006, Issue 3. Art. No.: CD002968. DOI: 10.1002/14651858.CD002968.pub2.

48  
49 Valkeinen H, Aaltonen S & Kujala UM. Effects of exercise training on oxygen uptake in coronary heart  
50 disease: a systematic review and meta-analysis. *Scandinavian Journal of Medicine & Science in Sports*.  
51 2010; 20(4): 545-555. DOI: 10.1111/j.1600-0838.2010.01133.x.

52  
53  
54 Vance D E. Self-rated emotional health in adults with and without HIV. *Psychological Reports*. 2006; 98(1):  
55 106-108.



**Evidence-Informed Recommendations in Rehabilitation for Older Adults Living HIV**

1  
2  
3  
4 Vance DE & Burrage Jr JW. Promoting successful cognitive aging in adults with HIV: Strategies for  
5 intervention. *Journal of Gerontological Nursing*. 2006; 32(11):34-41.  
6

7  
8 Vance DE & Burrage Jr JW. Cognitive complaints in adults aging with HIV: a pilot study. *Physical &*  
9 *Occupational Therapy in Geriatrics*. 2005; 24(2): 35-51.  
10

11 Vance DE, Moneyham L, Fordham P & Struzick TC. A model of suicidal ideation in adults aging with HIV.  
12 *JANAC: Journal of the Association of Nurses in AIDS Care*. 2008; 19(5): 375-384.  
13

14 Vance DE & Robinson FP. Reconciling successful aging with HIV: a biopsychosocial overview. *Journal of*  
15 *HIV/AIDS & Social Services*. 2004; 3(1): 59-78.  
16

17  
18 Vance DE & Struzick TC. Addressing risk factors of cognitive impairment in adults aging with HIV: a social  
19 work model. *Journal of Gerontological Social Work*. 2007; 49(4): 51-77.  
20

21 Vance DE & Woodley RA. Strengths and distress in adults who are aging with HIV: a pilot study.  
22 *Psychological Reports*. 2005; 96(2): 383-386.  
23

24  
25 van de Port IG, Wood-Dauphinee S, Lindeman E & Kwakkel G. Effects of exercise training programs on  
26 walking competency after stroke: a systematic review. *Am J Phys Med Rehabil*. 2007; 86(11): 935-951.  
27

28 Van Peppen RPS, Kortsmid M, Lindeman E & Kwakkel G. Effects of visual feedback therapy on postural  
29 control in bilateral standing after stroke: a systematic review. *Journal of Rehabilitation Medicine*. 2006;  
30 38(1): 3-9.  
31

32  
33 Van Peppen RP, Kwakkel G, Wood-Dauphinee S, Hendriks HJ, Van der Wees PJ & Dekker J. The impact of  
34 physical therapy on functional outcomes after stroke: what's the evidence? *Clinical Rehabilitation*. 2004; 18  
35 (8): 833-862  
36

37  
38 van Uffelen JG, Chin A Paw MJ, Hopman-Rock M & van Mechelen W. The Effects of Exercise on Cognition in  
39 Older Adults With and Without Cognitive Decline: A Systematic Review. *Clin J Sport Med*. 2008; 18(6):486-  
40 500.  
41

42 Velthuis MJ, Agasi-Idenburg SC, Aufdemkampe G & Wittink HM. The Effect of Physical Exercise on Cancer-  
43 related Fatigue during Cancer Treatment: a Meta-analysis of Randomised Controlled Trials. *Clinical*  
44 *Oncology*. 2010; 22 (3) 208-221. DOI: 10.1016/j.clon.2009.12.005.  
45

46  
47 Walker MF, Leonardi-Bee J, Bath P, Langhorne P, Dewey M, Corr S, Drummond A, Gilbertson L, Gladman JR,  
48 Jongbloed L, Logan P & Parker C. Individual patient data meta-analysis of randomized controlled trials of  
49 community occupational therapy for stroke patients. *Stroke*. 2004; 35(9): 2226-2232. Available from:  
50 <http://stroke.ahajournals.org/content/35/9/2226>.  
51

52  
53 Warsi A, LaValley MP, Wang PS, Avorn J & Solomon DH. Arthritis self-management education programs: A  
54 meta-analysis of the effect on pain and disability. *Arthritis and Rheumatism*. 2003; 48(8): 2207-2213.  
55

## Evidence-Informed Recommendations in Rehabilitation for Older Adults Living HIV

1  
2  
3 Wevers L, van de Port I, Vermue M, Mead G & Kwakkel G. Effects of Task-Oriented Circuit Class Training on  
4 Walking Competency After Stroke: A Systematic Review. *Stroke*. 2009; 40:2450-2459. Originally published  
5 online May 21, 2009 doi: 10.1161/STROKEAHA.108.541946.  
6

7  
8 Wilson K, Mottram PG & Vassilas C. Psychotherapeutic treatments for older depressed people. *Cochrane*  
9 *Database of Systematic Reviews* 2008, Issue 1. Art. No.: CD004853. DOI:  
10 10.1002/14651858.CD004853.pub2.  
11

12 Wutoh AK, Brown CM, Kumoji EK, Daftary MS, Jones T, Barnes NA & Powell NJ. Antiretroviral adherence  
13 and use of alternative therapies among older HIV-infected adults. *Journal of the National Medical*  
14 *Association*. 2001; 93(7-8): 243-250.  
15

16  
17 \*Indicates four references (interventions) that were referred to in the document but were not in the final  
18 recommendations.  
19



### Data Supplement File 3 - Characteristics of Included Studies in the Final Evidence-Informed Recommendations

#### Stream A: HIV, Aging and Rehabilitation (n=42 studies)

| Characteristic                                                                                                    | Number (%)             |
|-------------------------------------------------------------------------------------------------------------------|------------------------|
| <b>Total number of included studies</b> from which Stream A recommendations were derived                          | 42                     |
| <b>Sample size of participants across all included studies</b> ~<br>~based on 31/42 studies reporting sample size | 4585 participants      |
| <b>Mean age of study participants (years) (range)</b> +<br>+based on data from 23/42 studies                      | 50 years (42-68 years) |
| <b>Gender of participants in included studies*</b>                                                                |                        |
| Men                                                                                                               | 2497 (71%)             |
| Women                                                                                                             | 1022 (29%)             |
| Transgendered                                                                                                     | 10 (<1%)               |
| *based on 27/42 studies reporting gender                                                                          |                        |
| <b>Country of origin of included studies</b>                                                                      |                        |
| United States                                                                                                     | 38 (90%)               |
| Brazil                                                                                                            | 1 (2%)                 |
| Australia                                                                                                         | 1 (2%)                 |
| Not Reported                                                                                                      | 2 (5%)                 |
| <b>Year of Publication (Range)</b>                                                                                | 1991-2010              |
| <b>Methods of included studies</b>                                                                                |                        |
| Qualitative studies                                                                                               | 9 (21%)                |
| Quantitative studies                                                                                              | 21 (50%)               |
| Narrative reviews / commentary / editorial                                                                        | 12 (29%)               |
| <b>Study Designs</b> (as classified on data extraction forms)                                                     |                        |
| Review / narrative review                                                                                         | 13 (31%)               |
| Cross-sectional studies                                                                                           | 13 (31%)               |
| Survey                                                                                                            | 8 (19%)                |
| Intervention study (non-RCT)                                                                                      | 2 (5%)                 |
| Qualitative – Focus Group                                                                                         | 1 (2%)                 |
| Qualitative (other) – either cross-sectional or longitudinal                                                      | 5 (12%)                |

1  
2  
3  
4  
5  
6  
7  
8  
9  
10  
11  
12  
13  
14  
15  
16  
17  
18  
19  
20  
21  
22  
23  
24  
25  
26  
27  
28  
29  
30  
31  
32  
33  
34  
35  
36  
37  
38  
39  
40  
41  
42  
43  
44  
45  
46  
47  
48  
49

| <b>Final Theme Classification of Included Studies</b>                                         |    |       |
|-----------------------------------------------------------------------------------------------|----|-------|
| Overarching principles for rehabilitation of older adults with HIV                            | 2  | (5%)  |
| Mental health (depression; neurocognition)                                                    | 10 | (24%) |
| Determinants of Health                                                                        | 2  | (5%)  |
| Uncertainty                                                                                   | 1  | (2%)  |
| Physical health (aerobic capacity)                                                            | 2  | (5%)  |
| Social inclusion                                                                              | 1  | (2%)  |
| Spirituality                                                                                  | 4  | (10%) |
| Strategies to address health challenges for older adults with HIV<br>(lifestyle, coping, etc) | 3  | (7%)  |
| Extrinsic factors that influence HIV and aging<br>(social support, stigma, etc)               | 10 | (24%) |
| Personal attributes further increasing the complexity of HIV and Aging                        | 3  | (7%)  |
| Interventions (exercise; neurocognitive interventions)                                        | 4  | (10%) |

**Stream B: Rehabilitation Interventions in Comorbidities (n=108 studies)**

| Characteristic                                                                                                                                                | Number (%)           |
|---------------------------------------------------------------------------------------------------------------------------------------------------------------|----------------------|
| <b>Total number of included studies</b> from which Stream B recommendations were derived                                                                      | 108                  |
| <b>Total number of individual studies / trials included in the systematic reviews and meta-analyses</b>                                                       | 2484                 |
| <b>Sample size / total number of participants across all included studies in the systematic reviews and meta-analyses*</b><br>*as reported in 102/108 studies | 179,777 participants |
| <b>Year of publication (range)</b>                                                                                                                            | 1992-2011            |
| <b>Type of comorbidity in included studies</b>                                                                                                                |                      |
| Bone and joint disorders                                                                                                                                      | 11 (10%)             |
| Cancer                                                                                                                                                        | 12 (11%)             |
| Stroke                                                                                                                                                        | 31 (29%)             |
| Cardiovascular disease                                                                                                                                        | 16 (15%)             |
| Mental Health                                                                                                                                                 | 4 (4%)               |
| Cognitive Impairment                                                                                                                                          | 10 (9%)              |
| Chronic Obstructive Pulmonary Disease (COPD)                                                                                                                  | 7 (6%)               |
| Diabetes                                                                                                                                                      | 4 (4%)               |
| Older Adults                                                                                                                                                  | 11 (10%)             |
| HIV                                                                                                                                                           | 2 (2%)               |
| <b>Study Design of Included Studies</b>                                                                                                                       |                      |
| Cochrane systematic review*                                                                                                                                   | 36 (33%)             |
| Meta-analysis                                                                                                                                                 | 21 (19%)             |
| Systematic review or Clinical Practice Guideline (CPG)*                                                                                                       | 24 (22%)             |
| Systematic review and meta-analysis                                                                                                                           | 27 (25%)             |
| *Published by the Cochrane Collaboration/Wiley and/or follows Cochrane Collaboration protocol                                                                 |                      |

1  
2  
3  
4  
5  
6  
7  
8  
9  
10  
11  
12  
13  
14  
15  
16  
17  
18  
19  
20  
21  
22  
23  
24  
25  
26  
27  
28  
29  
30  
31  
32  
33  
34  
35  
36  
37  
38  
39  
40  
41  
42  
43  
44  
45  
46  
47  
48  
49

| <b>Intervention Focus of Included Studies</b> |    |       |
|-----------------------------------------------|----|-------|
| Biofeedback                                   | 1  | (1%)  |
| Education                                     | 1  | (1%)  |
| Electrical Stimulation                        | 2  | (2%)  |
| Exercise                                      | 63 | (58%) |
| Fall Prevention                               | 1  | (1%)  |
| Housing Models                                | 1  | (1%)  |
| Inspiratory Muscle Training                   | 1  | (1%)  |
| Mobilization                                  | 1  | (1%)  |
| Models of Care                                | 1  | (1%)  |
| Occupational Therapy                          | 4  | (4%)  |
| Prevention Programs                           | 1  | (1%)  |
| Psychotherapy                                 | 1  | (1%)  |
| Rehabilitation                                | 27 | (25%) |
| Self-Management Programs                      | 1  | (1%)  |
| Strength Training                             | 1  | (1%)  |
| Visual Feedback Therapy                       | 1  | (1%)  |

For peer review only

# BMJ Open

## Evidence-Informed Recommendations in Rehabilitation for Older Adults Living with HIV: A Knowledge Synthesis

|                                 |                                                                                                                                                                                                                                                                                                                                                                                                                                                                                                                                                                                                                                                                                                                                                                                                                                                                                                                            |
|---------------------------------|----------------------------------------------------------------------------------------------------------------------------------------------------------------------------------------------------------------------------------------------------------------------------------------------------------------------------------------------------------------------------------------------------------------------------------------------------------------------------------------------------------------------------------------------------------------------------------------------------------------------------------------------------------------------------------------------------------------------------------------------------------------------------------------------------------------------------------------------------------------------------------------------------------------------------|
| Journal:                        | <i>BMJ Open</i>                                                                                                                                                                                                                                                                                                                                                                                                                                                                                                                                                                                                                                                                                                                                                                                                                                                                                                            |
| Manuscript ID:                  | bmjopen-2013-004692.R1                                                                                                                                                                                                                                                                                                                                                                                                                                                                                                                                                                                                                                                                                                                                                                                                                                                                                                     |
| Article Type:                   | Research                                                                                                                                                                                                                                                                                                                                                                                                                                                                                                                                                                                                                                                                                                                                                                                                                                                                                                                   |
| Date Submitted by the Author:   | 07-Apr-2014                                                                                                                                                                                                                                                                                                                                                                                                                                                                                                                                                                                                                                                                                                                                                                                                                                                                                                                |
| Complete List of Authors:       | O'Brien, Kelly; University of Toronto, Department of Physical Therapy<br>Solomon, Patricia; McMaster University, School of Rehabilitation Science<br>Trentham, Barry; University of Toronto, Department of Occupational Science and Occupational Therapy<br>MacLachlan, Duncan; AIDS Committee of Toronto,<br>MacDermid, Joy; McMaster University, School of Rehabilitation Science<br>Tynan, Anne-Marie; St. Michael's Hospital,<br>Baxter, Larry; Canadian Working Group on HIV and Rehabilitation,<br>Casey, Alan; University of Manitoba, Department of Medicine<br>Chegwidden, William; University College Hospitals NHS Foundation Trust, National Hospital for Neurology and Neurosurgery<br>Robinson, Gregory; Canadian Working Group on HIV and Rehabilitation,<br>Tran, Todd; Women's College Hospital,<br>Wu, Janet; St. Michael's Hospital,<br>Zack, Elisse; Canadian Working Group on HIV and Rehabilitation, |
| <b>Primary Subject Heading</b>: | HIV/AIDS                                                                                                                                                                                                                                                                                                                                                                                                                                                                                                                                                                                                                                                                                                                                                                                                                                                                                                                   |
| Secondary Subject Heading:      | Rehabilitation medicine, Evidence based practice                                                                                                                                                                                                                                                                                                                                                                                                                                                                                                                                                                                                                                                                                                                                                                                                                                                                           |
| Keywords:                       | HIV & AIDS < INFECTIOUS DISEASES, REHABILITATION MEDICINE, aging, knowledge synthesis, evidence-informed recommendations                                                                                                                                                                                                                                                                                                                                                                                                                                                                                                                                                                                                                                                                                                                                                                                                   |
|                                 |                                                                                                                                                                                                                                                                                                                                                                                                                                                                                                                                                                                                                                                                                                                                                                                                                                                                                                                            |

SCHOLARONE™  
Manuscripts



1  
2  
3 38 **Corresponding Author**

4  
5 39 Kelly K. O'Brien  
6  
7 40 Department of Physical Therapy  
8  
9 41 University of Toronto  
10 42 160-500 University Avenue  
11 43 Toronto, Ontario M5G 1V7  
12 44 Canada  
13 45 Phone: 1-416-978-0565  
14 46 Fax: 1-416-946-8562  
15 47 Email: [kelly.obrien@utoronto.ca](mailto:kelly.obrien@utoronto.ca)

17 48 **KO** [kelly.obrien@utoronto.ca](mailto:kelly.obrien@utoronto.ca)

18 49 **PS** [solomon@mcmaster.ca](mailto:solomon@mcmaster.ca)

19 50 **BT** [B.Trentham@utoronto.ca](mailto:B.Trentham@utoronto.ca)

20 51 **DM** [dmaclachlan@utoronto.org](mailto:dmaclachlan@utoronto.org)

21 52 **JM** [macderj@mcmaster.ca](mailto:macderj@mcmaster.ca)

22 53 **AMT** [Tynanma@smh.ca](mailto:Tynanma@smh.ca)

23 54 **LB** [larrynbaxter@gmail.com](mailto:larrynbaxter@gmail.com)

24 55 **AC** [acasey@hsc.mb.ca](mailto:acasey@hsc.mb.ca)

25 56 **WC** [will.chegwidden@nhs.net](mailto:will.chegwidden@nhs.net)

26 57 **GR** [kodie@rogers.com](mailto:kodie@rogers.com)

27 58 **TT** [Todd.tran@wchospital.ca](mailto:Todd.tran@wchospital.ca)

28 59 **JW** [jwu@smh.ca](mailto:jwu@smh.ca)

29 60 **EZ** [ezack@hivandrehab.ca](mailto:ezack@hivandrehab.ca)

30  
31  
32  
33  
34  
35 61

36 62 **Key Words:** HIV/AIDS, aging, rehabilitation, disability, knowledge synthesis, evidence-informed  
37  
38 63 recommendations

39  
40  
41 64

42 65 **Word Count:** 4461

43  
44 66

45  
46  
47 67



68 **ABSTRACT**

69 **Objective:** Our aim was to develop evidence-informed recommendations in rehabilitation for  
70 older adults living with HIV.

71 **Design:** We conducted a knowledge synthesis, combining research evidence specific to HIV,  
72 rehabilitation and aging, with evidence on rehabilitation interventions for common  
73 comorbidities experienced by older adults with HIV.

74 **Methods:** We included highly relevant HIV-specific research addressing rehabilitation and aging  
75 (stream A) and high-quality evidence on the effectiveness of rehabilitation interventions for  
76 common comorbidities experienced by older adults aging with HIV (stream B). We extracted  
77 and synthesized relevant data from the evidence to draft evidence-informed recommendations  
78 on rehabilitation. Draft recommendations were refined based on people living with HIV (PLHIV)  
79 and clinician experience, values and preferences, reviewed by an interprofessional team for  
80 GRADE (quality) rating and revision, and then circulated to PLHIV and clinicians for external  
81 endorsement and final refinement. We then devised overarching recommendations to broadly  
82 guide rehabilitation for older PLHIV.

83 **Results:** This synthesis yielded eight overarching and 52 specific recommendations. Thirty-six  
84 specific recommendations were derived from 108 moderate or high level research articles  
85 (meta-analyses and systematic reviews) that described the effectiveness of rehabilitation  
86 interventions for comorbidities that may be experienced by older adults with HIV.  
87 Recommendations addressed rehabilitation interventions across eight health conditions: bone  
88 and joint disorders, cancer, stroke, cardiovascular disease, mental health challenges, cognitive  
89 impairments, chronic obstructive pulmonary disease, and diabetes. Sixteen specific

1  
2  
3 90 recommendations were derived from 42 research articles specific to rehabilitation for older  
4  
5  
6 91 adults with HIV. The quality of evidence from which these recommendations were derived was  
7  
8  
9 92 either low or very low, consisting primarily of narrative reviews or descriptive studies with small  
10  
11 93 sample sizes. Recommendations addressed approaches to rehabilitation assessment and  
12  
13 94 interventions, and contextual factors to consider with rehabilitation of older adults living with  
14  
15  
16 95 HIV.

17  
18 96 **Conclusions:** These evidence-informed recommendations provide a guide for rehabilitation  
19  
20  
21 97 with older adults with HIV.  
22  
23  
24  
25  
26  
27  
28  
29  
30  
31  
32  
33  
34  
35  
36  
37  
38  
39  
40  
41  
42  
43  
44  
45  
46  
47  
48  
49  
50  
51  
52  
53  
54  
55  
56  
57  
58  
59  
60

1  
2  
3 98 **Strengths and Limitations of this Study**  
4  
5

- 6  
7 99 ■ We developed evidence-informed recommendations for rehabilitation with older adults  
8  
9 100 living with HIV using a complex knowledge synthesis of two distinct areas of literature  
10  
11 101 while incorporating people living with HIV and clinician preferences throughout.  
12  
13 102 ■ Fifty-two recommendations were developed.  
14  
15  
16  
17 103 ○ Thirty-six specific recommendations were derived from 108 moderate or high level  
18  
19 104 research articles that described the effectiveness of rehabilitation interventions for  
20  
21 105 comorbidities that may be experienced by older adults with HIV. Recommendations  
22  
23 106 addressed rehabilitation interventions across eight health conditions commonly  
24  
25 107 experienced by older adults with HIV.  
26  
27  
28  
29 108 ○ Sixteen specific recommendations were derived from 42 research articles specific to  
30  
31 109 rehabilitation for older adults with HIV.  
32  
33  
34 110 ■ To our knowledge, these are the first evidence-informed recommendations for  
35  
36 111 rehabilitation developed specifically for older adults living with HIV.  
37  
38  
39 112 ■ Recommendations address approaches to rehabilitation assessment and interventions, and  
40  
41 113 contextual factors to consider with rehabilitation of older adults living with HIV.  
42  
43  
44  
45 114  
46  
47  
48  
49 115  
50  
51 116  
52  
53  
54  
55  
56  
57  
58  
59  
60

## 117 INTRODUCTION

118 As adults age with HIV, more individuals are living with the physical, social and psychological  
119 consequences of the disease, long term treatment, and comorbidities associated with aging [1-  
120 4]. For many, HIV is experienced as a chronic illness whereby individuals experience a range of  
121 health-related challenges known as **disability**, including symptoms and impairments (e.g.  
122 fatigue, weakness, pain), difficulties with day-to-day activities (e.g. household chores),  
123 challenges to social inclusion (e.g. ability to work) and uncertainty or worrying about future  
124 health as they age [5-7]. Premature onset of cardiovascular disease [8], diabetes [8], bone and  
125 joint disorders [9], neurocognitive disorders [10] and non-AIDS-defining cancers [11] further  
126 add to the complexity of disability aging with HIV [12-16]. Rehabilitation has become an  
127 increasingly important strategy to address disability experienced by adults aging with HIV and  
128 specifically older adults living with comorbidities [17].

129 **Rehabilitation** is broadly defined as any service or health provider that may address or  
130 prevent impairments, activity limitations or social participation restrictions experienced by an  
131 individual [17]. Rehabilitation assists in managing the health-related challenges or disability  
132 associated with HIV such as adverse effects of medications, fatigue, pain, neuropathy, mental  
133 health problems, cognitive problems and issues related to income and vocational support.  
134 Rehabilitation approaches such as physical therapy and occupational therapy are well  
135 established in complex chronic disease management and are associated with improvements in  
136 health outcomes in cardiovascular disease [18], stroke [19], and cancer [20]. However,  
137 rehabilitation in the context of HIV is still emerging. Few rehabilitation professionals work with  
138 people living with HIV (PLHIV) highlighting a gap in service provision and need for further HIV

1  
2  
3 139 knowledge, training and clinical guidance [21]. Evidence-informed guidelines are essential to  
4  
5  
6 140 enhance awareness among clinicians, researchers, educators, and PLHIV and to optimize HIV  
7  
8 141 rehabilitation for older adults with HIV.  
9

10  
11 142 No known guidelines specific to HIV rehabilitation and aging exist. Developing evidence-  
12  
13 143 informed recommendations in an emerging area of practice is challenging when high levels of  
14  
15 144 evidence in the form of systematic reviews and meta-analyses are often not available. Such is  
16  
17 145 the case with HIV, which has transitioned from an acute fatal illness to a chronic condition since  
18  
19 146 the advent of combination antiretroviral therapies became available in developed countries in  
20  
21 147 the mid-1990s. Combining lower level evidence on emerging issues of HIV and aging with  
22  
23 148 higher level evidence on rehabilitation interventions for other health conditions experienced by  
24  
25 149 older adults with HIV can provide a strong foundation for the development of evidence-  
26  
27 150 informed recommendations. Our aim was to develop evidence-informed recommendations in  
28  
29 151 rehabilitation for older adults living with HIV.  
30  
31  
32  
33  
34  
35  
36

## 37 152 **METHODS**

38  
39 153 We conducted a knowledge synthesis combining two streams of evidence: A) highly relevant  
40  
41 154 HIV-specific evidence addressing rehabilitation and aging and B) high quality evidence on the  
42  
43 155 effectiveness of non-pharmacologic rehabilitation interventions for comorbidities commonly  
44  
45 156 experienced by older adults aging with HIV. Synthesizing this evidence allowed us to consider  
46  
47 157 emerging literature specific to HIV and aging while taking advantage of existing high level  
48  
49 158 evidence on interventions for common conditions experienced by older adults and customizing  
50  
51 159 it to older adults with HIV.  
52  
53  
54  
55  
56  
57  
58  
59  
60

1  
2  
3 160 This research was led by an interdisciplinary team of researchers, educators, health  
4  
5  
6 161 providers with expertise in HIV, aging, and rehabilitation and PLHIV with lived experience of  
7  
8  
9 162 aging with HIV. The team engaged in all aspects of this study including the identification,  
10  
11 163 appraisal and synthesis of the literature, and development and refinement of the evidence-  
12  
13 164 informed recommendations. We incorporated PLHIV values and preferences and clinical  
14  
15  
16 165 expertise throughout [22]. This research received Research Ethics Board approval from  
17  
18  
19 166 McMaster University, Hamilton, Ontario, Canada.

## 21 22 167 **Searching and Identifying the Literature and Data Extraction**

### 23 24 25 168 *Stream A) Evidence specific to HIV, aging and rehabilitation*

26  
27  
28 169 We conducted a synthesis of published literature specific to HIV, aging and rehabilitation. We  
29  
30 170 searched electronic databases including MEDLINE, CINAHL, EMBASE, PsycINFO, from 1980 to  
31  
32  
33 171 December 2010. Search terms included: HIV, aging, and rehabilitation and were altered  
34  
35 172 depending on the database. We included studies that addressed issues related to HIV, aging  
36  
37  
38 173 (older adults 50 years and older) and rehabilitation, and were published in the English language.  
39  
40 174 We defined 'rehabilitation' as any non-pharmacological services, interventions, or providers  
41  
42  
43 175 who address or prevent impairments, activity limitations and social participation restrictions  
44  
45 176 experienced by an individual [17]. Given this is an emerging area of literature; all study designs,  
46  
47  
48 177 including narrative reviews were included.

49  
50  
51 178 *Stream B) High level evidence on rehabilitation interventions specific to comorbidities that may*  
52  
53  
54 179 *be experienced by older adults living with HIV*

1  
2  
3 180 We searched for high-quality evidence (systematic reviews and meta-analyses) on the  
4  
5  
6 181 effectiveness of non-pharmacologic rehabilitation interventions for comorbidities that may be  
7  
8  
9 182 experienced by older adults aging with HIV. We searched electronic databases including  
10  
11 183 MEDLINE, CINAHL, EMBASE, PsycINFO, the Cochrane Database of Systematic Reviews, and the  
12  
13 184 National Guideline Clearinghouse from 1980 to August 2011 for systematic reviews and meta-  
14  
15  
16 185 analyses related to common comorbidities. We included systematic reviews or meta-analyses  
17  
18 186 that addressed one or more comorbidities experienced by adults living with HIV which included  
19  
20  
21 187 but were not limited to: bone and joint disorders, cancer, cardiovascular disease, mental  
22  
23 188 health, neurocognitive decline, cardiopulmonary disease, diabetes and were published in  
24  
25  
26 189 English.

27  
28  
29 190 Five individuals independently reviewed abstracts from Stream A and B evidence to  
30  
31  
32 191 determine their eligibility for inclusion. Where disagreements occurred, the full text was  
33  
34 192 retrieved and a third reviewer determined final inclusion [23]. Two individuals independently  
35  
36  
37 193 reviewed full articles for inclusion. In situations of disagreement reviewers discussed articles to  
38  
39 194 reach consensus on final inclusion. Five individuals independently extracted data from the final  
40  
41  
42 195 group of included evidence onto a data charting form. Data extracted from Stream A evidence  
43  
44 196 included author, year, study location, study purpose, study design, intervention type and  
45  
46  
47 197 comparison group if any, details of the intervention, study populations, sample size, outcome  
48  
49 198 measures, key results, authors' overall conclusions, and reviewers' interpretations of important  
50  
51  
52 199 considerations and recommendations for HIV rehabilitation and aging. Data extracted from  
53  
54  
55 200 Stream B evidence included author, year, study purpose, study design (systematic review or  
56  
57 201 meta-analysis), characteristics of participants, number of included studies, sample size,  
58  
59  
60



1  
2  
3 202 intervention(s) and comparison group (if any), frequency, intensity, time and type of each  
4  
5  
6 203 intervention, outcome measures, key results, overall author conclusions, and reviewers'  
7  
8  
9 204 interpretations of considerations for developing evidence-based recommendations for older  
10  
11 205 adults living with HIV.

## 14 206 **Development of the Recommendations**

16  
17 207 We developed the evidence-informed recommendations using a three-phase iterative process  
18  
19 208 involving 1) classification, grading methodological quality, synthesis of the evidence, and  
20  
21 209 drafting the preliminary recommendations, 2) interprofessional team review, grading and  
22  
23 210 revision of recommendations incorporating values and preferences, and 3) external  
24  
25 211 endorsement and final refinement.  
26  
27  
28  
29

### 30 212 **PHASE 1 - Classification, Grading Methodological Quality, Synthesis and Drafting the**

#### 32 213 **Preliminary Recommendations (Figure 1)**

33  
34  
35 214 Our search yielded a total of 6664 independent citations (2512 from stream A and 4152 from  
36  
37 215 stream B), of which 165 studies (50 studies from Stream A, and 115 studies for Stream B) met  
38  
39 216 our inclusion criteria. Overall, our Phase 1 synthesis yielded 25 recommendations from Stream  
40  
41 217 A evidence, and 49 recommendations from Stream B evidence for a total of 74 preliminary  
42  
43 218 recommendations.  
44  
45  
46  
47

#### 48 219 *Stream A - Evidence specific to HIV, rehabilitation and aging*

50  
51 220 We classified the evidence (n=50 studies) based on 11 concepts to draft the preliminary  
52  
53 221 recommendations ranging from overarching principles for rehabilitation with older adults living  
54  
55 222 with HIV to interventions (Figure 1). We then assessed the methodological quality of each  
56  
57  
58  
59  
60

1  
2  
3 223 included article and the quality of the collective group of evidence from each of the 11 key  
4  
5  
6 224 concepts used to draft each recommendation using GRADE methodological quality criteria [24-  
7  
8 225 28]. Two authors knowledgeable in HIV, aging and rehabilitation (AMT, KO) independently  
9  
10  
11 226 synthesized the extracted data using directed content analysis techniques [29] and formulated  
12  
13 227 key themes surrounding rehabilitation assessment and treatment that informed the  
14  
15  
16 228 recommendations. One author (KO) then drafted 25 preliminary recommendations by  
17  
18 229 synthesizing results and conclusions from each collective group of evidence. Subsequently, two  
19  
20  
21 230 authors (PS, KO) met to review the accuracy of the content analysis and collectively agreed on  
22  
23 231 preliminary evidence-informed recommendations specific to HIV, aging and rehabilitation.  
24  
25

26  
27 232 *Stream B - High level evidence on rehabilitation interventions for common comorbidities*  
28

29 233 We grouped Stream B evidence by comorbidity experienced by older adults living with HIV,  
30  
31  
32 234 followed by the respective intervention. We classified the evidence based on 11 areas (bone  
33  
34 235 and joint disorders; cancer; stroke; cardiovascular disease (CVD); mental health challenges;  
35  
36 236 cognitive impairments; Parkinson's Disease; chronic obstructive pulmonary disease (COPD);  
37  
38  
39 237 diabetes; older adults; HIV) (Figure 1). We assessed the methodological quality of each article,  
40  
41  
42 238 and the quality of evidence from each collective area of focus used to draft each  
43  
44 239 recommendation using the GRADE criteria [24-28]. Two authors (KO, AMT) independently  
45  
46 240 synthesized the recommendations from the meta-analyses and systematic reviews using  
47  
48  
49 241 directed content analysis techniques [29] surrounding assessment, treatment intervention,  
50  
51  
52 242 intensity, progression of intensity, and health outcomes for each comorbidity. One author (KO)  
53  
54 243 then drafted a total of 49 preliminary recommendations from the 115 included articles by  
55  
56  
57 244 synthesizing each collective group of study results and overall conclusions. Two authors (KO, PS)  
58  
59  
60

1  
2  
3 245 met to review the accuracy of the synthesis to collectively determine preliminary evidence-  
4  
5  
6 246 informed recommendations for each of the comorbidities. The resulting 49 recommendations  
7  
8  
9 247 for Stream B spanned 11 areas of focus: bone and joint disorders (6 recommendations); cancer  
10  
11 248 (8); stroke (12); CVD (7); mental health challenges (4); cognitive impairments (3); Parkinson's  
12  
13 249 disease (1); COPD (4); diabetes (1); older adults (2); and HIV (1).  
14  
15

16  
17 250 **PHASE 2 – Research Team GRADING of Recommendations and Incorporating Values and**  
18  
19 251 **Preferences among PLHIV and Clinicians (Figure 2)**  
20  
21

22 252 We circulated the 74 preliminary recommendations to researchers, PLHIV and clinicians on the  
23  
24  
25 253 synthesis team in order to obtain GRADE ratings for the recommendations and incorporate  
26  
27  
28 254 individual experiences, values and preferences. For each recommendation, the team member  
29  
30 255 indicated the GRADE rating incorporating both quality of the evidence and the extent to which  
31  
32  
33 256 the recommendation was applicable to older adults living with HIV. GRADE rating at this stage  
34  
35 257 included four levels [24-28]: **High** – fully endorse or strongly recommended. This  
36  
37  
38 258 recommendation would be appropriate for the majority of older adults living with HIV,  
39  
40 259 suggested wording of the recommendation would include; 'we should or should not do';  
41  
42  
43 260 **Moderate** – moderately endorse or recommend. This recommendation would be applicable to  
44  
45 261 some older adults with HIV; **Low** - minimally endorse or weak recommendation. This  
46  
47  
48 262 recommendation would be applicable to a few older adults with HIV, with potential variability  
49  
50 263 in values and preferences. Wording of this recommendation would include; 'we suggest, may  
51  
52  
53 264 recommend or may not recommend'; or **Very low** - do not endorse or do not recommend at all.  
54  
55 265 This recommendation would not be appropriate for older adults living with HIV.  
56  
57  
58  
59  
60

1  
2  
3 266 This phase of GRADE rating required a trade-off between benefits and drawbacks, and  
4  
5  
6 267 values and principles of the PLHIV, clinician or researcher. Team members were asked to  
7  
8  
9 268 comment on their values and preferences related to the recommendation and how these  
10  
11 269 influenced their rating. Team members also suggested revisions or refinement to the  
12  
13  
14 270 recommendation.

15  
16  
17 271 Collectively the evidence specific to HIV aging and rehabilitation (Stream A) was low to  
18  
19 272 very low quality as much of the evidence consisted of cross-sectional qualitative or quantitative  
20  
21 273 studies (with no comparison group) or narrative reviews. No randomized-controlled trials  
22  
23  
24 274 (RCTs) were included. Clinicians and PLHIV on the team incorporated their clinical expertise and  
25  
26  
27 275 experience, values and preferences, respectively, when determining their final GRADE rating.  
28  
29 276 For Stream B given only systematic reviews or meta-analyses were included, the rating of the  
30  
31  
32 277 evidence was either very high or high. However, the GRADING of the recommendation  
33  
34 278 depended on the extent to which the team felt the evidence was applicable to older adults with  
35  
36  
37 279 HIV and if the intervention posed minimal risk or harm to those living with HIV and these  
38  
39 280 comorbidities.

## 41 42 43 281 **Phase 2 GRADE Results**

44  
45  
46 282 The research team met twice to discuss the overall GRADE results, and recommendations for  
47  
48 283 revision (Research Team Meetings #2 and #3). In the latter meeting we summarized and  
49  
50  
51 284 incorporated values and preferences of PLHIV and clinicians into the recommendations (Figure  
52  
53  
54 285 2).

55  
56  
57 286  
58  
59  
60

1  
2  
3 287 *Stream A - GRADE RATING RESULTS and REVISION*  
4  
5

6  
7 288 We consolidated similar or overlapping recommendations and deleted those not highly  
8  
9 289 endorsed by the majority of the team. We also removed recommendations to specific  
10  
11 290 interventions with inconclusive evidence because of team concerns of endorsing specific  
12  
13  
14 291 interventions over others under-reported in the research evidence.  
15  
16

17  
18 292 Overall this process resulted in the deletion of eight articles. The remaining 42 articles  
19  
20 293 in Stream A yielded 16 evidence-informed recommendations for older adults with HIV that  
21  
22 294 spanned three themes: 1) implications for future education of rehabilitation professionals (1  
23  
24 295 recommendation); 2) approaches to rehabilitation assessment and treatment (14  
25  
26 296 recommendations); and 3) interventions (1 recommendation) (Figure 2).  
27  
28  
29

30  
31 297 *Stream B - GRADE RATING RESULTS and REVISION*  
32  
33

34 298 Based on the GRADE rating of team members and our meeting discussions we revised the  
35  
36 299 Stream B recommendations. We deleted recommendations that were not endorsed by the  
37  
38 300 clinicians and PLHIV and recommendations that referred to conditions not common to HIV and  
39  
40 301 aging. Overall this process resulted in the removal of 6 articles. The remaining 109 articles in  
41  
42 302 Stream B yielded 40 evidence-informed recommendations that spanned the 10 areas: bone and  
43  
44 303 joint disorders, cancer (general, lung and metastatic cancer), stroke, CVD (myocardial infarction,  
45  
46 304 heart disease, heart failure), mental health challenges, cognitive impairment, COPD, diabetes,  
47  
48 305 older adults and HIV/AIDS (Figure 2). Recommendations spanned interventions including  
49  
50 306 exercise, rehabilitation, self-management, cognitive rehabilitation, pulmonary rehabilitation,  
51  
52  
53  
54  
55  
56  
57  
58  
59  
60

1  
2  
3 307 electrotherapeutic modalities, cardiac rehabilitation, inspiratory muscle training,  
4  
5  
6 308 psychotherapy, models of care, and housing models.  
7  
8

9 309 **PHASE 3 - EXTERNAL ENDORSEMENT- Incorporating 'expert knowledge' from clinicians and**  
10  
11 310 **adults living with HIV (Figure 3)**  
12  
13

14  
15 311 We circulated the recommendations electronically to a broader group of 38 clinicians and PLHIV  
16  
17 312 for external endorsement using an online survey. We asked participants whether they  
18  
19  
20 313 endorsed, did not endorse, or had no opinion about each recommendation. Participants were  
21  
22 314 also invited to provide comments. We considered endorsement rates of >80%, 60-80%, and  
23  
24 315 <60% as high, moderate and low levels of endorsement, respectively. Responses from this  
25  
26  
27 316 endorsement phase were incorporated into the final revision and refinement of the evidence-  
28  
29  
30 317 informed recommendations (Figure 3).  
31  
32

33 318 **External Endorsement Results:** Of the 38 PLHIV and clinicians invited to participate in the online  
34  
35 319 endorsement survey, 19 (50%) completed the online survey. Of the 19 individuals who  
36  
37 320 completed the endorsement survey, 9 (47%) were health professionals, 8 (42%) were PLHIV and  
38  
39 321 2 (11%) were both a health professional and PLHIV. Health professionals included physicians  
40  
41 322 (geriatrics and infectious diseases) (27%), occupational therapists (27%), speech-language  
42  
43 323 pathologists (27%) and social workers (18%).  
44  
45  
46  
47

48 324 Rates of endorsement for each recommendation ranged from 47% (9/19 participants) to  
49  
50 325 100% (19/19 participants). The number of participants who viewed the citations from which  
51  
52 326 the recommendations were derived ranged from three (16%) to 10 participants (53%).  
53  
54  
55  
56 327 Participants tended to highly endorse recommendations in Stream A and those in Stream B  
57  
58  
59  
60

1  
2  
3 328 related to exercise. Recommendations related to inconclusive evidence had lower rates of  
4  
5  
6 329 endorsement. Endorsement participants highlighted how recommendations could be  
7  
8  
9 330 applicable to any population (not just older adults with HIV). Others recommended highlighting  
10  
11 331 other interventions not captured in the recommendations, such as yoga or tai-chi. See Data  
12  
13 332 Supplement File 1 for an overview of the endorsement results.

14  
15  
16 333 Two recommendations endorsed by <60% of participants were removed. The team  
17  
18 334 further synthesized the final 52 specific recommendations into eight overarching  
19  
20  
21 335 recommendations on rehabilitation for older adults living with HIV. See Data Supplement File  
22  
23 336 2 for the final evidence-informed recommendations and Data Supplement File 3 for  
24  
25  
26 337 characteristics of included studies in the final recommendations.

### 27 28 338 **Final Recommendations**

29  
30  
31 339 Results of this synthesis are presented across two streams that represent the two different  
32  
33 340 bodies of research evidence totaling 52 specific recommendations (Data Supplement File 2).  
34  
35  
36 341 We also present overarching recommendations derived from the specific detailed evidence-  
37  
38 342 informed recommendations on rehabilitation for older adults living with HIV (Table 1).

### 39 40 41 343 *Specific (Detailed) Recommendations*

42  
43  
44 344 Stream A results include 16 recommendations derived from 42 research evidence articles  
45  
46  
47 345 specific to rehabilitation for older adults living with HIV. The level of evidence from which these  
48  
49 346 recommendations were derived was either low or very low, meaning the articles were mostly  
50  
51  
52 347 narrative review articles or descriptive studies (either qualitative or quantitative) with small  
53  
54  
55 348 sample sizes. Although the studies were low level evidence, the PLHIV and clinician  
56  
57 349 endorsements indicated that these were of fundamental importance in management of  
58  
59  
60



1  
2  
3 350 disability in older adults living with HIV. Stream A recommendations serve as the contextual  
4  
5  
6 351 backdrop to providing rehabilitation care, treatment and support to older adults living with HIV.  
7  
8  
9 352 Some of the recommendations have additional explanatory notes to further explain the context  
10  
11 353 and PLHIV and clinician values (Data Supplement File 2). The recommendations are organized  
12  
13 354 into six categories: A) preparedness of rehabilitation professionals; B) approaches to  
14  
15  
16 355 rehabilitation assessment and treatment of older adults living with HIV; C) extrinsic factors to  
17  
18 356 consider with rehabilitation of older adults living with HIV; D) intrinsic factors to consider with  
19  
20  
21 357 rehabilitation of older adults living with HIV; E) rehabilitation approaches; and F) rehabilitation  
22  
23 358 interventions (Data Supplement File 2).

24  
25  
26  
27 359 Stream B results include 36 recommendations derived from 108 moderate or high level  
28  
29 360 research evidence articles describing the effectiveness of rehabilitation interventions for adults  
30  
31  
32 361 living with health conditions and include specific considerations when applying rehabilitation  
33  
34 362 interventions for older PLHIV (Figure 3). Stream B recommendations include an overview of  
35  
36  
37 363 the prevalence of the condition among older adults with HIV, main health-related challenges  
38  
39 364 for older adults with HIV experiencing this condition from a rehabilitation perspective, study  
40  
41  
42 365 citations and level of evidence from which the recommendation was derived, age of  
43  
44 366 participants included in the evidence (not all high level rehabilitation intervention evidence was  
45  
46  
47 367 specific to older adults). The recommendations include specific considerations for older adults  
48  
49 368 with HIV. The recommendations are presented based on interventions across A) older adults, B)  
50  
51  
52 369 HIV/AIDS, and eight common comorbidities that may be experienced by older adults with HIV;  
53  
54  
55 370 C) bone and joint disorders, D) cancer, E) stroke, F) cardiovascular disease, G) mental health  
56  
57 371 challenges, H) cognitive impairments, I) COPD and J) diabetes (Data Supplement File 2).  
58  
59  
60

1  
2  
3 372 *Overarching Recommendations*  
4  
5

6  
7 373 To facilitate knowledge transfer and exchange, we established overarching recommendations  
8  
9 374 that summarized the detailed recommendations in a condensed manner (Table 1). We  
10  
11 375 consolidated the 52 specific recommendations into eight overarching recommendations on  
12  
13 376 rehabilitation for older adults living with HIV. These recommendations were endorsed at a final  
14  
15 377 team meeting and provide a broader overview of the evidence synthesis.  
16  
17  
18

19  
20 378 **Table 1- Overarching Evidence-Informed Recommendations in Rehabilitation for Older Adults**  
21

22  
23 379 **Living with HIV**  
24

25 380 The following overarching recommendations provide a general guide to providing rehabilitation care,  
26  
27 381 treatment and support with older adults living with HIV.  
28  
29  
30

31  
32 **Overarching Recommendations in Rehabilitation for Older Adults Living with HIV**  
33

- 34  
35 1. Rehabilitation professionals should be prepared to provide care to older adults with HIV who  
36 present with **complex comorbidities** affecting neurological, cardiorespiratory and  
37 musculoskeletal systems that may result in physical, mental and social health challenges.  
38
- 39  
40 2. Rehabilitation professionals should adopt an **individualized and interprofessional approach to**  
41 **practice** that is sensitive to the **unique values, preferences and needs of older adults with HIV**.  
42 This approach should include comprehensive assessment and treatment of **physical,**  
43 **neurocognitive and mental health impairments, uncertainty (or worrying about the future),**  
44 **functional activity limitations, and social exclusion** while considering the intersections between  
45 **personal and social attributes** and the **broader determinants of health**.  
46  
47
- 48  
49 3. **Multidisciplinary rehabilitation** including physical therapy, occupational therapy and speech-  
50 language pathology is strongly recommended across the **continuum of care** (acute,  
51 rehabilitation and community-based care) for older adults with HIV to address the multi-  
52 dimensional and episodic nature of disability attributed to HIV and its comorbidities such as  
53 bone and joint disorders, cancer, stroke, cardiovascular disease, mental health, cognitive  
54 impairment, chronic obstructive pulmonary disease (COPD) and diabetes.  
55  
56  
57  
58  
59  
60

4. Rehabilitation professionals should consider the role of **extrinsic contextual factors** such as stigma and ageism, HIV disclosure, and emotional and practical social supports on the health and well-being of older adults living with HIV.
5. Rehabilitation professionals should consider the role of **intrinsic contextual factors** such as self-management and spirituality on the health and well-being of older adults living with HIV.
6. A **combination of aerobic and resistive exercise** may be recommended for older adults living with HIV who are medically stable and living with comorbidities including bone and joint disorders, cancer, stroke, cardiovascular disease, stroke, mental health, cognitive impairment, chronic obstructive pulmonary disease (COPD), and diabetes. The frequency, intensity, time and type of exercise should be individually tailored to the specific goals and capacity of the individual and the specific co-morbidity.
7. **Cognitive rehabilitation interventions** (e.g. cognitive training, cognitive stimulation, cognitive rehabilitation) may be recommended for older adults living with HIV with mild cognitive impairment, and stroke. Inconclusive or insufficient evidence exists to support the use of **cognitive behavioural therapy** with older adults with HIV with **depression**. While cognitive rehabilitation does not appear harmful, weak evidence exists to support the use of cognitive-specific interventions to improve spatial neglect, disability, memory, and functional status for older adults who experience stroke. Rehabilitation professionals are encouraged to refer to specific clinical practice guidelines for each health condition to determine the effects of different cognitive interventions for older adults with HIV living with comorbidity.
8. In the absence of high level evidence on rehabilitation interventions for older adults living with HIV and comorbidities, rehabilitation professionals should refer to **existing clinical practice guidelines, systematic reviews, meta-analyses, and other forms of high level evidence for recommendations on interventions for a specific comorbidity**. These recommendations should be applied using an individualized approach incorporating the unique values, preferences, goals and needs of the individual.

382

## 383 DISCUSSION

384 We developed evidence-informed recommendations for rehabilitation with older adults living  
385 with HIV using a complex knowledge synthesis of two distinct areas of literature while  
386 incorporating PLHIV and clinician preferences throughout. To our knowledge, these are the first

1  
2  
3 387 evidence-informed recommendations for rehabilitation developed specifically for older adults  
4  
5  
6 388 with HIV.  
7

8  
9 389 These recommendations may be useful for rehabilitation clinicians who have not  
10  
11 390 worked with PLHIV and HIV specialists unfamiliar with rehabilitation who need an  
12  
13 391 understanding of evidence-informed rehabilitation so that they can make appropriate referrals  
14  
15 392 for their older clients living with HIV. Stream A recommendations were derived from very low  
16  
17 393 level evidence and result in general statements. Nevertheless, we feel these recommendations  
18  
19 394 are useful in addressing an overall approach to working with older adults with HIV. The low  
20  
21 395 level of evidence derived from this area of literature highlights the paucity of evidence specific  
22  
23 396 to rehabilitation for older adults with HIV and indicates the need for increased work in this  
24  
25 397 area. While our focus was with older adults with HIV, many of the Stream B recommendations  
26  
27 398 were derived from evidence not specific to older adults. The wording of our recommendations  
28  
29 399 depended on how well, or to what extent we could make the 'leap' from the condition-specific  
30  
31 400 evidence to a recommendation for rehabilitation specific to older adults living with HIV and  
32  
33 401 these comorbidities. We included an overview of the prevalence of the comorbidities among  
34  
35 402 older adults with HIV to assist clinicians in implementing the recommendations among adults  
36  
37 403 with HIV living with comorbidities [30]. The supportive notes that augment the  
38  
39 404 recommendations were derived primarily from PLHIV and clinician values and preferences to  
40  
41 405 help situate the recommendation into the context of older adults with HIV. Rehabilitation  
42  
43 406 professionals often tailor treatment strategies to address the consequences of disease  
44  
45 407 (disability) using an individualized goal-setting approach that considers the unique health and  
46  
47 408 social challenges experienced by older adults with HIV. In the absence of high level evidence  
48  
49  
50  
51  
52  
53  
54  
55  
56  
57  
58  
59  
60

1  
2  
3 409 on rehabilitation interventions specific to older adults with HIV, clinicians may refer to the  
4  
5  
6 410 existing guidelines for the specific comorbidity, and incorporate an individualized approach to  
7  
8  
9 411 assessment and treatment.

10  
11  
12 412 We chose to present a combination of specific and overarching recommendations to  
13  
14 413 guide rehabilitation for older adults with HIV. Those working with older adults with a specific  
15  
16  
17 414 comorbidity may find the detailed recommendations useful to their practice. Although specific  
18  
19  
20 415 recommendations are more likely to be followed [31], we feel the consolidated (overarching)  
21  
22 416 recommendations may be useful to health providers less familiar working in HIV care and well-  
23  
24 417 suited for knowledge translation to a broader health provider audience and community-based  
25  
26  
27 418 organizations.

28  
29  
30 419 Overall strengths of our approach included our unique synthesis of two distinct areas of  
31  
32  
33 420 literature combining lower level evidence on emerging issues of HIV and aging with higher level  
34  
35  
36 421 evidence on comorbidities commonly experienced by PLHIV to provide a strong foundation for  
37  
38 422 the development of evidence-informed recommendations. We used a systematic approach to  
39  
40  
41 423 identifying literature, determining inclusion, data extraction, and drafting and refining the  
42  
43 424 recommendations. We drafted the recommendations to include clear actionable and precise  
44  
45  
46 425 terminology, associated with the level of evidence available. We included specific citations  
47  
48 426 from which the recommendation was derived so readers may refer to the original evidence  
49  
50  
51 427 source of the recommendation [32].

52  
53  
54 428 Our interprofessional and community-integrated approach involving 'expert' older  
55  
56 429 PLHIV and clinicians brought a diverse group of stakeholders together on numerous occasions  
57  
58  
59  
60

1  
2  
3 430 to engage in the iterative process of recommendation development, review and refinement  
4  
5  
6 431 and ensured the recommendations were practical and relevant to the HIV community. External  
7  
8 432 endorsement further integrated PLHIV and clinician preferences into assessing the feasibility  
9  
10 433 and refinement of recommendations for use in HIV practice [30]. Knowledge, values and  
11  
12 434 experiences of clinicians and PLHIV were integral into the development of the  
13  
14  
15  
16 435 recommendations, particularly when determining the relevance or unique considerations when  
17  
18 436 devising recommendations from evidence derived from other chronic conditions. Our  
19  
20  
21 437 community engaged approach involved PLHIV as members of the core research team, as well as  
22  
23 438 participants in the external endorsement phase. This form of community-academic-clinical  
24  
25  
26 439 research partnership is growing in prominence because it strengthens the potential for  
27  
28 440 effective knowledge transfer and exchange in health research [33].  
29  
30  
31

32 441 Challenges of this synthesis included combining two areas of research evidence that  
33  
34 442 differed in quality and context. We chose to retain two parallel but distinct syntheses  
35  
36 443 presented as one collective set of recommendations enabling us to synthesize emerging lower  
37  
38  
39 444 level evidence on HIV aging and rehabilitation with higher level more established evidence in  
40  
41 445 chronic diseases experienced by older adults with HIV [34]. Much of the evidence from which  
42  
43 446 these recommendations were derived is from the United States, hence the generalizability of  
44  
45  
46 447 these recommendations to other contexts is unknown. The lack of high level Stream A  
47  
48 448 evidence specific to HIV, aging and rehabilitation resulted in high level considerations when  
49  
50  
51 449 working with older adults with HIV, and emphasize the need for further rehabilitation  
52  
53  
54 450 intervention research specific to older adults with HIV. Disparities emerged among evidence  
55  
56  
57 451 considered weak by GRADE definition, but essential to the values and preferences of PLHIV and  
58  
59  
60

1  
2  
3 452 clinicians. We were uncertain how to weight the research evidence with PLHIV and clinician  
4  
5  
6 453 values and preferences in order to establish the strength of a given recommendation. We chose  
7  
8  
9 454 to remove recommendations for rehabilitation approaches with weak evidence that were not  
10  
11 455 highly endorsed by the majority of team members. Finally, these evidence-informed  
12  
13 456 recommendations do not specifically address the issue of caregiving, respite and potential  
14  
15  
16 457 caregiver burnout, important issues that should be considered by clinicians in the context of  
17  
18  
19 458 HIV and aging [35].

20  
21  
22 459 The development of these recommendations is timely given the changing demographic  
23  
24 460 of adults aging with HIV. These recommendations directly address key research priorities on  
25  
26  
27 461 comorbidities and access to rehabilitation identified in a national scoping study of the Canadian  
28  
29 462 Working Group on HIV and Rehabilitation (CWGHR) [36]. Our recommendations also address  
30  
31  
32 463 key issues related to HIV, rehabilitation and aging that emerged from a national consultation  
33  
34  
35 464 with PLHIV, researchers, educators, clinicians, and policy stakeholders by CWGHR including  
36  
37 465 comorbidities experienced by older PLHIV and social determinants of health [37]. These issues  
38  
39 466 similarly emerged from the external endorsement whereby participants also indicated the  
40  
41  
42 467 importance of end of life care [38], lifestyle modifications including adoption of exercise and  
43  
44  
45 468 yoga [39, 40], and smoking cessation among older adults with HIV [41] as critical to consider in  
46  
47 469 the care and prevention strategies to enhance health for older PLHIV. Moreover, while  
48  
49  
50 470 evidence describes potential benefits of supplements used in osteoarthritis [42], or central  
51  
52 471 nervous stimulants to alleviate HIV-associated cognitive impairments and fatigue [43, 44], the  
53  
54  
55 472 focus of these rehabilitation recommendations were non-pharmacological in nature. We  
56  
57 473 developed these recommendations in accordance with the principles outlined by CWGHR for  
58  
59  
60



1  
2  
3 474 the development of guidelines for rehabilitation in HIV [45]. Merging the traditionally separate  
4  
5  
6 475 areas of rehabilitation, HIV and disability, enabled us to create evidence-informed  
7  
8  
9 476 recommendations that are relevant for rehabilitation in the context of HIV and provide clear  
10  
11 477 actionable recommendations that could direct future practice [45].  
12  
13

14 478         Limitations of this research included the qualitative nature of the synthesis whereby we  
15  
16  
17 479 were unable to pool results from included studies into meta-analyses. Given our approach to  
18  
19  
20 480 identify comorbidities, we may have missed other high level evidence on rehabilitation  
21  
22 481 interventions such as fall prevention or balance training that may not be specific to our pre-  
23  
24 482 determined comorbidities but may be employed with older adults living with multiple  
25  
26  
27 483 comorbidities. Rehabilitation interventions clinicians use in practice beneficial to older adults  
28  
29 484 with HIV may not have been captured in this synthesis due to the paucity of HIV and aging  
30  
31  
32 485 literature (Stream A) or due to their lack of high level of evidence (Stream B). Finally, HIV-  
33  
34 486 specific evidence on rehabilitation for older adults with HIV continues to emerge since we  
35  
36  
37 487 conducted our literature search for included studies in 2011. Recent evidence suggests  
38  
39 488 cognitive rehabilitation interventions such as computerized speed of processing training and  
40  
41  
42 489 self-generation strategies can enhance verbal recall, and cognitive function among older adults  
43  
44 490 with HIV, and that interventions to promote self-efficacy and social support may enhance  
45  
46  
47 491 health-related quality of life among older men with HIV [46-49]. Ongoing revision of the  
48  
49 492 recommendations will be required to reflect the emerging evidence and changing needs of  
50  
51  
52 493 older adults living with HIV.  
53  
54

55 494  
56  
57  
58  
59  
60

1  
2  
3 495 **CONCLUSIONS**

4  
5  
6 496 We established eight overarching and 52 specific evidence-informed recommendations from a  
7  
8 497 combination of low level evidence specific to HIV, aging and rehabilitation and high level  
9  
10 498 research evidence describing the effectiveness of rehabilitation interventions for adults living  
11  
12 499 with comorbidities experienced by older adults with HIV. PLHIV and clinician values and  
13  
14 500 preferences were integral in developing these recommendations. Recommendations address  
15  
16 501 approaches to rehabilitation assessment and interventions, and contextual factors to consider  
17  
18 502 with rehabilitation of older adults living with HIV. These evidence-informed recommendations  
19  
20 503 provide a guide for rehabilitation with older PLHIV.  
21  
22  
23  
24  
25

26 504

27  
28 505

29  
30  
31 506 **AUTHORS' CONTRIBUTIONS**

32  
33 507 KO and PS led the conceptual design of the study, acquisition of funding, conducted the  
34  
35 508 synthesis, and drafted the manuscript. KO, PS, AMT, DM, and BT reviewed evidence for  
36  
37 509 inclusion; KO, PS, BT, AMT, and DM extracted data from included studies; KO, AMT, PS, and BT,  
38  
39 510 conducted the initial methodological quality assessment and primary synthesis; LB, BT, DM, AC,  
40  
41 511 WC, GR, JW, and TT were involved in the review and GRADING of the recommendations,  
42  
43 512 analytical interpretations, endorsement, and refinement of the recommendations. JM provided  
44  
45 513 overall guidance on the synthesis methodology. EZ was the principal knowledge user and  
46  
47 514 advised on the overall development and process for future translation of the  
48  
49 515 recommendations. All authors read and approved the final manuscript.  
50  
51  
52  
53  
54  
55

56 516  
57  
58  
59  
60

1  
2  
3 517 **ACKNOWLEDGEMENTS**  
4  
5

6 518 We gratefully acknowledge Elizabeth Uleryk (Hospital for Sick Children) for her role in the  
7  
8 519 search strategy; Ken King (Canadian Working Group on HIV and Rehabilitation) and Sheila  
9  
10 520 Thomas (St. Michael's Hospital) for their role as knowledge users in earlier phases of this work;  
11  
12 521 Jenn Jimmo for her role in data extraction, Nicole Gervais for her involvement in the  
13  
14 522 implementation of the endorsement survey, and Nkem Iku for her involvement in the literature  
15  
16 523 review, endorsement survey summary, and the formatting of the recommendations. We also  
17  
18 524 thank David Vance and Debra Henninger, authors of included evidence who graciously provided  
19  
20 525 additional information for this synthesis.  
21  
22  
23  
24  
25

26 526 We acknowledge the following individuals for their involvement in the endorsement  
27  
28 527 phase of the recommendations development: Colleen Price, Glyn Townson (Canadian Working  
29  
30 528 Group on HIV and Rehabilitation), Rob Alexander (HIVER Consulting), Charles Furlotte (Hamilton  
31  
32 529 Health Sciences Centre, McMaster University), Dawn James (Nine Circles Community Health  
33  
34 530 Centre), Francisco Ibáñez-Carrasco (Ontario HIV Treatment Network), Gordon Arbess (St.  
35  
36 531 Michael's Hospital), Bani Ahuja (Occupational Therapist), Michael Hamilton, Evan Collins  
37  
38 532 (Department of Psychiatry, University of Toronto), and Murray Jose (Toronto People With AIDS  
39  
40 533 Foundation).  
41  
42  
43  
44  
45

46 534 **FUNDING**  
47

48 535 This research was funded by a Canadian Institutes of Health Research (CIHR) Knowledge  
49  
50 536 Synthesis grant (Fund # 108046). At the time of this study, Kelly O'Brien was funded by a  
51  
52 537 Fellowship from the CIHR and a Michael DeGroote Postdoctoral Fellowship (McMaster  
53  
54 538 University). Kelly is funded by a CIHR New Investigator Award, HIV/AIDS Research Initiative.  
55  
56  
57  
58  
59  
60

1  
2  
3 539 **CONTRIBUTORSHIP STATEMENT**  
4

5  
6 540 Kelly O'Brien and Patricia Solomon led the conceptual design of the study, acquisition of funding,  
7  
8 541 conducted the synthesis, and drafted the manuscript. Kelly O'Brien (KO), Patricia Solomon (PS), Anne-  
9  
10 542 Marie Tynan (AMT), Duncan MacLachlan (DM), and Barry Trentham (BT) reviewed evidence for  
11  
12 543 inclusion; KO, PS, BT, AMT, and DM extracted data from included studies; KO, AMT, PS, and BT,  
13  
14 544 conducted the initial methodological quality assessment and primary synthesis; Larry Baxter (LB), BT,  
15  
16 545 DM, Alan Casey (AC), William Chegwidan (WC), Gregory Robinson (GR), Janet Wu (JW), and Todd Tran  
17  
18 546 (TT) were involved in the review and GRADING of the recommendations, analytical interpretations,  
19  
20 547 endorsement, and refinement of the recommendations. JM provided overall guidance on the synthesis  
21  
22 548 methodology. EZ was the principal knowledge user and advised on the overall development and process  
23  
24 549 for future translation of the recommendations. All authors read and approved the final manuscript.  
25  
26  
27

28  
29 550 **COMPETING INTERESTS**  
30

31  
32 551 The authors have no competing interests to declare.  
33  
34

35  
36 552 **DATA SHARING STATEMENT**  
37

38 553 No additional data are available.  
39  
40  
41 554  
42  
43  
44  
45  
46  
47  
48  
49  
50  
51  
52  
53  
54  
55  
56  
57  
58  
59  
60

## 555 REFERENCES

- 1  
2  
3  
4  
5  
6  
7 556 1. Kirk JB, Goetz MB. Human immunodeficiency virus in an aging population, a  
8  
9 557 complication of success. *J Am Geriatr Soc* 2009;57:2129-2138.
- 10  
11 558 2. Oursler KK, Goulet JL, Leaf DA, et al. Association of comorbidity with physical disability in  
12  
13 559 older HIV-infected adults. *AIDS Patient Care STDS* 2006;20:782-791.
- 14  
15  
16  
17 560 3. Weiss JJ, Osorio G, Ryan E, et al. Prevalence and patient awareness of medical  
18  
19 561 comorbidities in an urban AIDS clinic. *AIDS Patient Care STDS* 2010;24:39-48.
- 20  
21  
22 562 4. Willard S, Holzemer WL, Wantland DJ, et al. Does "asymptomatic" mean without  
23  
24 563 symptoms for those living with HIV infection? *AIDS Care* 2009;21:322-328.
- 25  
26  
27 564 5. O'Brien KK, Bayoumi AM, Strike C, et al. Exploring disability from the perspective of  
28  
29 565 adults living with HIV/AIDS: development of a conceptual framework. *Health Qual Life*  
30  
31 566 *Outcomes* 2008;6:76.
- 32  
33  
34 567 6. Rusch M, Nixon S, Schilder A, et al. Impairments, activity limitations and participation  
35  
36 568 restrictions: prevalence and associations among persons living with HIV/AIDS in British  
37  
38 569 Columbia. *Health Qual Life Outcomes* 2004;2:46.
- 39  
40  
41  
42 570 7. Rusch M, Nixon S, Schilder A, et al. Prevalence of activity limitation among persons living  
43  
44 571 with HIV/AIDS in British Columbia. *Can J Public Health* 2004;95:437-440.
- 45  
46  
47 572 8. Vance DE, Mugavero M, Willig J, et al. Aging With HIV: A Cross-Sectional Study of  
48  
49 573 Comorbidity Prevalence and Clinical Characteristics Across Decades of Life. *J Assoc*  
50  
51 574 *Nurses AIDS Care* 2011; 22:17-25.
- 52  
53  
54 575 9. Brown TT, McComsey GA. Osteopenia and osteoporosis in patients with HIV: a review of  
55  
56 576 current concepts. *Curr Infect Dis Rep* 2006;8:162-170.
- 57  
58  
59  
60

- 1  
2  
3 577 10. Heaton RK, Clifford DB, Franklin DR, Jr., et al. HIV-associated neurocognitive disorders  
4  
5  
6 578 persist in the era of potent antiretroviral therapy: CHARTER Study. *Neurology*  
7  
8 579 2011;75:2087-2096.
- 10 580 11. Shiels MS, Cole SR, Kirk GD, et al. A meta-analysis of the incidence of non-AIDS cancers  
11  
12 581 in HIV-infected individuals. *J Acquir Immune Defic Syndr* 2009;52:611-622.
- 15 582 12. Heckman TG, Heckman BD, Kochman A, et al. Psychological symptoms among persons  
16  
17 583 50 years of age and older living with HIV disease. *Aging & Mental Health* 2002;6:121-  
18  
19 584 128.
- 22 585 13. Grov C, Golub SA, Parsons JT, et al. Loneliness and HIV-related stigma explain depression  
23  
24 586 among older HIV-positive adults. *AIDS Care* 2010;22:630-639.
- 27 587 14. Vance DE, Woodley RA. Strengths and distress in adults who are aging with HIV: a pilot  
28  
29 588 study. *Psychol Rep* 2005;96:383-386.
- 32 589 15. Oursler KK, Sorkin JD, Smith BA, et al. Reduced aerobic capacity and physical functioning  
33  
34 590 in older HIV-infected men. *AIDS Res Hum Retroviruses* 2006;22:1113-1121.
- 37 591 16. Oursler KK, Goulet JL, Crystal S, et al. Association of age and comorbidity with physical  
38  
39 592 function in HIV-infected and uninfected patients: results from the Veterans Aging Cohort  
40  
41 593 Study. *AIDS Patient Care STDS* 2011;25:13-20.
- 44 594 17. Worthington C, Myers T, O'Brien K, et al. Rehabilitation in HIV/AIDS: development of an  
45  
46 595 expanded conceptual framework. *AIDS Patient Care STDS* 2005;19:258-271.
- 49 596 18. Jolliffe JA, Rees K, Taylor RS, et al. Exercise-based rehabilitation for coronary heart  
50  
51 597 disease. *Cochrane Database Syst Rev* 2001:CD001800.
- 52  
53  
54  
55  
56  
57  
58  
59  
60

- 1  
2  
3 598 19. Saunders DH, Greig CA, Mead GE, et al. Physical fitness training for stroke patients.  
4  
5  
6 599 *Cochrane Database Syst Rev* 2009:CD003316.  
7  
8  
9 600 20. Cramp F, Daniel J. Exercise for the management of cancer-related fatigue in adults.  
10  
11 601 *Cochrane Database Syst Rev* 2008:CD006145.  
12  
13 602 21. Worthington C, Myers T, O'Brien K, et al. Rehabilitation professionals and human  
14  
15 immunodeficiency virus care: results of a national Canadian survey. *Arch Phys Med*  
16 603 *Rehabil* 2008;89:105-113.  
17  
18 604  
19  
20  
21 605 22. van der Weijden T, Legare F, Boivin A, et al. How to integrate individual patient values  
22  
23 606 and preferences in clinical practice guidelines? A research protocol. *Implement Sci*  
24  
25 607 2010;5:10.  
26  
27  
28 608 23. Higgins J, Green S. *Cochrane Handbook for Systematic Reviews of Interventions*. The  
29  
30  
31 609 Cochrane Collaboration. Version 5.0.2 [updated September 2009]. 2009.  
32  
33 610 24. Atkins D, Best D, Briss PA, et al. Grading quality of evidence and strength of  
34  
35 611 recommendations. *Bmj* 2004;328:1490.  
36  
37  
38 612 25. Guyatt G, Gutterman D, Baumann MH, et al. Grading strength of recommendations and  
39  
40 613 quality of evidence in clinical guidelines: report from an american college of chest  
41  
42 614 physicians task force. *Chest* 2006;129:174-181.  
43  
44  
45 615 26. Brozek JL, Akl EA, Alonso-Coello P, et al. Grading quality of evidence and strength of  
46  
47 616 recommendations in clinical practice guidelines. Part 1 of 3. An overview of the GRADE  
48  
49 617 approach and grading quality of evidence about interventions. *Allergy* 2009;64:669-677.  
50  
51  
52 618 27. Brozek JL, Akl EA, Jaeschke R, et al. Grading quality of evidence and strength of  
53  
54 619 recommendations in clinical practice guidelines: Part 2 of 3. The GRADE approach to  
55  
56  
57  
58  
59  
60



- 1  
2  
3 620 grading quality of evidence about diagnostic tests and strategies. *Allergy* 2009;64:1109-  
4  
5  
6 621 1116.  
7  
8  
9 622 28. Brozek JL, Akl EA, Compalati E, et al. Grading quality of evidence and strength of  
10  
11 623 recommendations in clinical practice guidelines part 3 of 3. The GRADE approach to  
12  
13 624 developing recommendations. *Allergy* 2011;66:588-595.  
14  
15  
16 625 29. Hsieh HF, Shannon SE. Three approaches to qualitative content analysis. *Qual Health Res*  
17  
18 626 2005; 15:1277-1288.  
19  
20  
21 627 30. Shekelle P, Woolf S, Grimshaw JM, et al. Developing clinical practice guidelines:  
22  
23 628 reviewing, reporting, and publishing guidelines; updating guidelines; and the emerging  
24  
25  
26 629 issues of enhancing guideline implementability and accounting for comorbid conditions  
27  
28 630 in guideline development. *Implement Sci* 2012;7:62.  
29  
30  
31 631 31. Grol R, Dalhuijsen J, Thomas S, et al. Attributes of clinical guidelines that influence use of  
32  
33 632 guidelines in general practice: observational study. *Bmj* 1998;317:858-861.  
34  
35  
36 633 32. Woolf S, Schunemann HJ, Eccles MP, et al. Developing clinical practice guidelines: types  
37  
38 634 of evidence and outcomes; values and economics, synthesis, grading, and presentation  
39  
40  
41 635 and deriving recommendations. *Implement Sci* 2012;7:61.  
42  
43  
44 636 33. Rhodes SD, Malow RM, Jolly C. Community-based participatory research: a new and not-  
45  
46 637 so-new approach to HIV/AIDS prevention, care, and treatment. *AIDS Educ Prev*  
47  
48 638 2010;22:173-183.  
49  
50  
51 639 34. Turner-Stokes L. Evidence for the effectiveness of multi-disciplinary rehabilitation  
52  
53 640 following acquired brain injury: a synthesis of two systematic approaches. *J Rehabil Med*  
54  
55  
56 641 2008;40:691-701.  
57  
58  
59  
60

- 1  
2  
3 642 35. Emlet CA, Poindexter CC. Unserved, unseen, and unheard: integrating programs for HIV-  
4  
5  
6 643 infected and HIV-affected older adults. *Health Soc Work* 2004;29:86-96.  
7  
8  
9 644 36. O'Brien K, Wilkins A, Zack E, et al. Scoping the Field: Identifying Key Research Priorities in  
10  
11 645 HIV and Rehabilitation. *AIDS Behav* 2010;14:448-458.  
12  
13  
14 646 37. Canadian Working Group on HIV and Rehabilitation. Partners in Aging: Report on a  
15  
16 647 national project on HIV and Aging. 2010.  
17  
18  
19 648 38. Harding R, Karus D, Easterbrook P, et al. Does palliative care improve outcomes for  
20  
21 649 patients with HIV/AIDS? A systematic review of the evidence. *Sex Transm Infect*  
22  
23 650 2005;81:5-14.  
24  
25  
26 651 39. Yahiaoui A, McGough EL, Voss JG. Development of evidence-based exercise  
27  
28 652 recommendations for older HIV-infected patients. *J Assoc Nurses AIDS Care*  
29  
30 653 2012;23:204-219.  
31  
32  
33 654 40. Cade WT, Reeds DN, Mondy KE, et al. Yoga lifestyle intervention reduces blood pressure  
34  
35 655 in HIV-infected adults with cardiovascular disease risk factors. *HIV Med* 2010;11:379-  
36  
37 656 388.  
38  
39  
40  
41 657 41. Nahvi S, Cooperman NA. Review: the need for smoking cessation among HIV-positive  
42  
43 658 smokers. *AIDS Educ Prev* 2009;21:14-27.  
44  
45  
46 659 42. Salazar J, Bello L, Chavez M, et al. Glucosamine for Osteoarthritis: Biological Effects,  
47  
48 660 Clinical Efficacy, and Safety on Glucose Metabolism. *Arthritis* 2014;2014:432463.  
49  
50  
51 661 43. Breitbart W, Rosenfeld B, Kaim M, et al. A randomized, double-blind, placebo-controlled  
52  
53 662 trial of psychostimulants for the treatment of fatigue in ambulatory patients with  
54  
55 663 human immunodeficiency virus disease. *Arch Intern Med* 2001;161:411-420.  
56  
57  
58  
59  
60

- 1  
2  
3 664 44. Hinkin CH, Castellon SA, Hardy DJ, et al. Methylphenidate improves HIV-1-associated  
4  
5  
6 665 cognitive slowing. *J Neuropsychiatry Clin Neurosci* 2001;13:248-254.  
7  
8  
9 666 45. O'Brien KK, Wilkins A, Zack E, et al. Developing clinical practice guidelines in HIV  
10  
11 667 rehabilitation: process recommendations and guiding principles. *AIDS Educ Prev*  
12  
13 668 2011;23:457-468.  
14  
15  
16 669 46. Vance DE, Fazeli PL, Ross LA, et al. Speed of processing training with middle-age and  
17  
18 670 older adults with HIV: a pilot study. *J Assoc Nurses AIDS Care* 2012;23:500-510.  
19  
20  
21 671 47. Weber E, Woods SP, Kellogg E, et al. Self-generation enhances verbal recall in individuals  
22  
23 672 infected with HIV. *J Int Neuropsychol Soc* 2012;18:128-133.  
24  
25  
26 673 48. Weber E, Blackstone K, Woods SP. Cognitive neurorehabilitation of HIV-associated  
27  
28 674 neurocognitive disorders: a qualitative review and call to action. *Neuropsychol Rev*  
29  
30 675 2013;23:81-98.  
31  
32  
33 676 49. Emlet CA, Fredriksen-Goldsen KI, Kim HJ. Risk and protective factors associated with  
34  
35 677 health-related quality of life among older gay and bisexual men living with HIV disease.  
36  
37 678 *Gerontologist* 2013;53:963-972.  
38  
39  
40  
41  
42 679  
43  
44  
45 680  
46  
47  
48  
49 681  
50  
51  
52 682  
53  
54  
55 683  
56  
57  
58  
59  
60

1  
2  
3 684 **FIGURE LEGENDS**  
4

5  
6 685 **Figure 1:** Overview of Knowledge Synthesis Procedure – Classification, Assessing Methodological  
7  
8 686 Quality, Synthesis and Drafting Preliminary Recommendations (Phase 1)  
9

10  
11 687 **Figure 2:** Overview of Knowledge Synthesis Procedure – Research Team GRADING of  
12  
13 688 Recommendations and Incorporating Values and Preferences (Phase 2)  
14

15  
16 689 **Figure 3:** Overview of Knowledge Synthesis Procedure – External Endorsement (Phase 3)  
17  
18 690  
19

20  
21 691

22  
23 692 **DATA SUPPLEMENT FILES (WEB ONLY)**  
24

25  
26 693 Data Supplement File 1 – External Endorsement Results  
27

28 694 Data Supplement File 2 - Evidence Informed Recommendations in Rehabilitation for Older  
29  
30 695 Adults Living with HIV  
31  
32

33 696 Data Supplement File 3 - Characteristics of Included Studies in the Evidence-Informed  
34  
35 697 Recommendations in Rehabilitation for Older Adults Living with HIV  
36  
37  
38  
39  
40  
41  
42  
43  
44  
45  
46  
47  
48  
49  
50  
51  
52  
53  
54  
55  
56  
57  
58  
59  
60

1  
2  
3  
4  
5  
6  
7  
8  
9 | **Developing Evidence-Informed Recommendations in Rehabilitation for Older Adults Living**  
10 **with HIV: A Knowledge Synthesis**  
11

12 4 Kelly K. O'Brien<sup>1,2,3</sup>

13 5 Patricia Solomon<sup>2</sup>

14 6 Barry Trentham<sup>4</sup>

15 7 Duncan MacLachlan<sup>5</sup>

16 8 Joy MacDermid<sup>2</sup>

17 9 Anne-Marie Tynan<sup>6</sup>

18 10 Larry Baxter<sup>3</sup>

19 11 Alan Casey<sup>7</sup>

20 12 William Chegwidden<sup>8</sup>

21 13 Greg Robinson<sup>3</sup>

22 14 Todd Tran<sup>9</sup>

23 15 Janet Wu<sup>6</sup>

24 16 Elisse Zack<sup>3</sup>

25  
26 17 <sup>1</sup>Department of Physical Therapy, University of Toronto  
27 18 Toronto, Ontario, Canada

28 19  
29 20 <sup>2</sup>School of Rehabilitation Science, McMaster University  
30 21 Hamilton, Ontario, Canada

31  
32 22 <sup>3</sup>Canadian Working Group on HIV and Rehabilitation  
33 23 Toronto, Ontario, Canada

34  
35 24 <sup>4</sup>Department of Occupational Science and Occupational Therapy, University of Toronto  
36 25 Toronto, Ontario, Canada

37  
38 26 <sup>5</sup>AIDS Committee of Toronto  
39 27 Toronto, Ontario, Canada

40  
41 28 <sup>6</sup>St. Michael's Hospital,  
42 29 Toronto, Ontario, Canada

43  
44 30 <sup>7</sup>Faculty of Medicine, University of Manitoba  
45 31 Winnipeg, Manitoba, Canada

46  
47 33 <sup>8</sup>National Hospital for Neurology and Neurosurgery  
48 34 University College Hospitals NHS Foundation Trust  
49 35 London, United Kingdom

50  
51 36 <sup>9</sup>Women's College Hospital  
52 37 Toronto, Ontario, Canada

1  
2  
3  
4  
5  
6  
7  
8  
9 38 **Corresponding Author**

10 39 Kelly K. O'Brien  
11 40 Department of Physical Therapy  
12 41 University of Toronto  
13 42 160-500 University Avenue  
14 43 Toronto, Ontario M5G 1V7  
15 44 Canada  
16 45 Phone: 1-416-978-0565  
17 46 Fax: 1-416-946-8562  
18 47 Email: [kelly.obrien@utoronto.ca](mailto:kelly.obrien@utoronto.ca)

19  
20 48 **KO** [kelly.obrien@utoronto.ca](mailto:kelly.obrien@utoronto.ca)

21 49 **PS** [solomon@mcmaster.ca](mailto:solomon@mcmaster.ca)

22 50 **BT** [B.Trentham@utoronto.ca](mailto:B.Trentham@utoronto.ca)

23 51 **DM** [dmaclachlan@actontario.org](mailto:dmaclachlan@actontario.org)

24 52 **JM** [macderj@mcmaster.ca](mailto:macderj@mcmaster.ca)

25 53 **AMT** [Tynanma@smh.ca](mailto:Tynanma@smh.ca)

26 54 **LB** [larrynbaxter@gmail.com](mailto:larrynbaxter@gmail.com)

27 55 **AC** [acasey@hsc.mb.ca](mailto:acasey@hsc.mb.ca)

28 56 **WC** [will.chegwidden@nhs.net](mailto:will.chegwidden@nhs.net)

29 57 **GR** [kodie@rogers.com](mailto:kodie@rogers.com)

30 58 **TT** [Todd.tran@wchospital.ca](mailto:Todd.tran@wchospital.ca)

31 59 **JW** [jwwwj@smh.ca](mailto:jwwwj@smh.ca)

32 60 **EZ** [ezack@hivandrehab.ca](mailto:ezack@hivandrehab.ca)

Field Code Changed

33  
34 61  
35 62 **Key Words:** HIV/AIDS, aging, rehabilitation, disability, knowledge synthesis, evidence-informed  
36 63 recommendations  
37 64

38  
39  
40 65 **Word Count:** 4268  
41 66  
42  
43 67  
44  
45  
46  
47  
48  
49  
50  
51  
52  
53  
54  
55  
56  
57  
58  
59  
60

68 **ABSTRACT**

69 **Objective:** Our aim was to develop evidence-informed recommendations in rehabilitation for  
70 older adults living with HIV.

71 **Design:** We conducted a knowledge synthesis, combining research evidence specific to HIV,  
72 rehabilitation and aging, with evidence on rehabilitation interventions for common  
73 comorbidities experienced by older adults with HIV.

74 **Methods:** We included highly relevant HIV-specific research addressing rehabilitation and aging  
75 (stream A) and high-quality evidence on the effectiveness of rehabilitation interventions for  
76 common comorbidities experienced by older adults aging with HIV (stream B). We extracted  
77 and synthesized relevant data from the evidence to draft evidence-informed recommendations  
78 on rehabilitation. Draft recommendations were refined based on people living with HIV (PLHIV)  
79 and clinician experience, values and preferences, reviewed by an interprofessional team for  
80 GRADE (quality) rating and revision, and then circulated to PLHIV and clinicians for external  
81 endorsement and final refinement. We then devised overarching recommendations to broadly  
82 guide rehabilitation for older PLHIV.

83 **Results:** This synthesis yielded eight overarching and 52 specific recommendations. Thirty-six  
84 specific recommendations were derived from 108 moderate or high level research articles  
85 (meta-analyses and systematic reviews) that described the effectiveness of rehabilitation  
86 interventions for comorbidities that may be experienced by older adults with HIV.  
87 Recommendations addressed rehabilitation interventions across eight health conditions: bone  
88 and joint disorders, cancer, stroke, cardiovascular disease, mental health challenges, cognitive  
89 impairments, chronic obstructive pulmonary disease, and diabetes. Sixteen specific



1  
2  
3  
4  
5  
6  
7  
8  
9 90 recommendations were derived from 42 research articles specific to rehabilitation for older  
10 91 adults with HIV. The quality of evidence from which these recommendations were derived was  
11 92 either low or very low, consisting primarily of narrative reviews or descriptive studies with small  
12 93 sample sizes. Recommendations addressed approaches to rehabilitation assessment and  
13 94 interventions, and contextual factors to consider with rehabilitation of older adults living with  
14 95 HIV.  
15 96 **Conclusions:** These evidence-informed recommendations provide a guide for rehabilitation  
16 97 with older adults with HIV.

1  
2  
3  
4  
5  
6  
7  
8  
9  
10  
11  
12  
13  
14  
15  
16  
17  
18  
19  
20  
21  
22  
23  
24  
25  
26  
27  
28  
29  
30  
31  
32  
33  
34  
35  
36  
37  
38  
39  
40  
41  
42  
43  
44  
45  
46  
47  
48  
49  
50  
51  
52  
53  
54  
55  
56  
57  
58  
59  
60

## 98 Strengths and Limitations of this Study

- 99     ▪ We developed evidence-informed recommendations for rehabilitation with older adults  
100     living with HIV using a complex knowledge synthesis of two distinct areas of literature  
101     while incorporating people living with HIV and clinician preferences throughout.
- 102     ▪ Fifty-two recommendations were developed.
  - 103         ○ Thirty-six specific recommendations were derived from 108 moderate or high level  
104         research articles that described the effectiveness of rehabilitation interventions for  
105         comorbidities that may be experienced by older adults with HIV. Recommendations  
106         addressed rehabilitation interventions across eight health conditions commonly  
107         experienced by older adults with HIV.
  - 108         ○ Sixteen specific recommendations were derived from 42 research articles specific to  
109         rehabilitation for older adults with HIV.
- 110     ▪ To our knowledge, these are the first evidence-informed recommendations for  
111     rehabilitation developed specifically for older adults living with HIV.
- 112     ▪ Recommendations address approaches to rehabilitation assessment and interventions, and  
113     contextual factors to consider with rehabilitation of older adults living with HIV.

Formatted: Highlight

1  
2  
3  
4  
5  
6  
7  
8  
9 117 **INTRODUCTION**

10 118 As adults age with HIV, more individuals are living with the physical, social and psychological  
11 119 consequences of the disease, long term treatment, and comorbidities associated with aging [1-  
12 120 4]. For many, HIV is experienced as a chronic illness whereby individuals experience a range of  
13 121 health-related challenges known as *disability*, including symptoms and impairments (e.g.  
14 122 fatigue, weakness, pain), difficulties with day-to-day activities (e.g. household chores),  
15 123 challenges to social inclusion (e.g. ability to work) and uncertainty or worrying about future  
16 124 health as they age [5-7]. Premature onset of cardiovascular disease [8], diabetes [8], bone and  
17 125 joint disorders [9], neurocognitive disorders [10] and non-AIDS-defining cancers [11] further  
18 126 add to the complexity of disability aging with HIV [12-16]. Rehabilitation has become an  
19 127 increasingly important strategy to address disability experienced by adults aging with HIV and  
20 128 specifically older adults living with comorbidities [17].

21 129 *Rehabilitation* is broadly defined as any service or health provider that may address or  
22 130 prevent impairments, activity limitations or social participation restrictions experienced by an  
23 131 individual [17]. Rehabilitation assists in managing the health-related challenges or disability  
24 132 associated with HIV such as adverse effects of medications, fatigue, pain, neuropathy, mental  
25 133 health problems, cognitive problems and issues related to income and vocational support.

26 134 Rehabilitation approaches such as physical therapy and occupational therapy are well  
27 135 established in complex chronic disease management and are associated with improvements in  
28 136 health outcomes in cardiovascular disease [18], stroke [19], and cancer [20]. However,  
29 137 rehabilitation in the context of HIV is still emerging. Few rehabilitation professionals work with  
30 138 people living with HIV (PLHIV) highlighting a gap in service provision and need for further HIV

1  
2  
3  
4  
5  
6  
7  
8  
9 139 knowledge, training and clinical guidance [21]. Evidence-informed guidelines are essential to  
10 140 enhance awareness among clinicians, researchers, educators, and PLHIV and to optimize HIV  
11 141 rehabilitation for older adults with HIV.

12  
13  
14  
15  
16 142 No known guidelines specific to HIV rehabilitation and aging exist. Developing evidence-  
17 143 informed recommendations in an emerging area of practice is challenging when high levels of  
18 144 evidence in the form of systematic reviews and meta-analyses are often not available. Such is  
19 145 the case with HIV, which has transitioned from an acute fatal illness to a chronic condition since  
20 146 the advent of combination antiretroviral therapies [became available in developed countries](#) in  
21 147 the mid-1990s. Combining lower level evidence on emerging issues of HIV and aging with  
22 148 higher level evidence on rehabilitation interventions for other health conditions experienced by  
23 149 older adults with HIV can provide a strong foundation for the development of evidence-  
24 150 informed recommendations. Our aim was to develop evidence-informed recommendations in  
25 151 rehabilitation for older adults living with HIV.

## 36 152 **METHODS**

37 153 We conducted a knowledge synthesis combining two streams of evidence: A) highly relevant  
38 154 HIV-specific evidence addressing rehabilitation and aging and B) high quality evidence on the  
39 155 effectiveness of **non-pharmacologic rehabilitation interventions** for comorbidities commonly  
40 156 experienced by older adults aging with HIV. Synthesizing this evidence allowed us to consider  
41 157 emerging literature specific to HIV and aging while taking advantage of existing high level  
42 158 evidence on interventions for common conditions experienced by older adults and customizing  
43 159 it to older adults with HIV.

Formatted: Highlight

1  
2  
3  
4  
5  
6  
7  
8  
9 160 This research was led by an interdisciplinary team of researchers, educators, health  
10 161 providers with expertise in HIV, aging, and rehabilitation and PLHIV with lived experience of  
11 162 aging with HIV. The team engaged in all aspects of this study including the identification,  
12 163 appraisal and synthesis of the literature, and development and refinement of the evidence-  
13 164 informed recommendations. We incorporated PLHIV values and preferences and clinical  
14 165 expertise throughout [22]. This research received Research Ethics Board approval from  
15 166 McMaster University, Hamilton, Ontario, Canada.

#### 167 **Searching and Identifying the Literature and Data Extraction**

##### 168 *Stream A) Evidence specific to HIV, aging and rehabilitation*

169 We conducted a synthesis of published literature specific to HIV, aging and rehabilitation. We  
170 searched electronic databases including MEDLINE, CINAHL, EMBASE, PsycINFO, from 1980 to  
171 December 2010. Search terms included: HIV, aging, and rehabilitation and were altered  
172 depending on the database. We included studies that addressed issues related to HIV, aging  
173 (older adults 50 years and older) and rehabilitation, and were published in the English language.  
174 We defined 'rehabilitation' as any **non-pharmacological services**, interventions, or providers  
175 who address or prevent impairments, activity limitations and social participation restrictions  
176 experienced by an individual [17]. Given this is an emerging area of literature; all study designs,  
177 including narrative reviews were included.

178 *Stream B) High level evidence on rehabilitation interventions specific to comorbidities that may*  
179 *be experienced by older adults living with HIV*

Formatted: Highlight

1  
2  
3  
4  
5  
6  
7  
8  
9 180 We searched for high-quality evidence (systematic reviews and meta-analyses) on the  
10  
11 181 effectiveness of non-pharmacologic rehabilitation interventions for comorbidities that may be  
12  
13 182 experienced by older adults aging with HIV. We searched electronic databases including  
14  
15 183 MEDLINE, CINAHL, EMBASE, PsycINFO, the Cochrane Database of Systematic Reviews, and the  
16  
17 184 National Guideline Clearinghouse from 1980 to August 2011 for systematic reviews and meta-  
18  
19 185 analyses related to common comorbidities. We included systematic reviews or meta-analyses  
20  
21 186 that addressed one or more comorbidities experienced by adults living with HIV which included  
22  
23 187 but were not limited to: bone and joint disorders, cancer, cardiovascular disease, mental  
24  
25 188 health, neurocognitive decline, cardiopulmonary disease, diabetes and were published in  
26  
27 189 English.

28  
29  
30 190 Five individuals independently reviewed abstracts from Stream A and B evidence to  
31  
32 191 determine their eligibility for inclusion. Where disagreements occurred, the full text was  
33  
34 192 retrieved and a third reviewer determined final inclusion [23]. Two individuals independently  
35  
36 193 reviewed full articles for inclusion. In situations of disagreement reviewers discussed articles to  
37  
38 194 reach consensus on final inclusion. Five individuals independently extracted data from the final  
39  
40 195 group of included evidence onto a data charting form. Data extracted from Stream A evidence  
41  
42 196 included author, year, study location, study purpose, study design, intervention type and  
43  
44 197 comparison group if any, details of the intervention, study populations, sample size, outcome  
45  
46 198 measures, key results, authors' overall conclusions, and reviewers' interpretations of important  
47  
48 199 considerations and recommendations for HIV rehabilitation and aging. Data extracted from  
49  
50 200 Stream B evidence included author, year, study purpose, study design (systematic review or  
51  
52 201 meta-analysis), characteristics of participants, number of included studies, sample size,  
53  
54  
55  
56  
57  
58  
59  
60

Formatted: Highlight

1  
2  
3  
4  
5  
6  
7  
8  
9 202 intervention(s) and comparison group (if any), frequency, intensity, time and type of each  
10 203 intervention, outcome measures, key results, overall author conclusions, and reviewers'  
11 204 interpretations of considerations for developing evidence-based recommendations for older  
12 205 adults living with HIV.

### 17 206 **Development of the Recommendations**

19 207 We developed the evidence-informed recommendations using a three-phase iterative process  
20 208 involving 1) classification, grading methodological quality, synthesis of the evidence, and  
21 209 drafting the preliminary recommendations, 2) interprofessional team review, grading and  
22 210 revision of recommendations incorporating values and preferences, and 3) external  
23 211 endorsement and final refinement.

### 30 212 **PHASE 1 - Classification, Grading Methodological Quality, Synthesis and Drafting the**

#### 32 213 **Preliminary Recommendations (Figure 1)**

34 214 Our search yielded a total of 6664 independent citations (2512 from stream A and 4152 from  
35 215 stream B), of which 165 studies (50 studies from Stream A, and 115 studies for Stream B) met  
36 216 our inclusion criteria. Overall, our Phase 1 synthesis yielded 25 recommendations from Stream  
37 217 A evidence, and 49 recommendations from Stream B evidence for a total of 74 preliminary  
38 218 recommendations.

#### 45 219 **Stream A - Evidence specific to HIV, rehabilitation and aging**

47 220 We classified the evidence (n=50 studies) based on 11 concepts to draft the preliminary  
48 221 recommendations ranging from overarching principles for rehabilitation with older adults living  
49 222 with HIV to interventions (Figure 1). We then assessed the methodological quality of each

Formatted: Highlight



1  
2  
3  
4  
5  
6  
7  
8  
9  
10  
11  
12  
13  
14  
15  
16  
17  
18  
19  
20  
21  
22  
23  
24  
25  
26  
27  
28  
29  
30  
31  
32  
33  
34  
35  
36  
37  
38  
39  
40  
41  
42  
43  
44  
45  
46  
47  
48  
49  
50  
51  
52  
53  
54  
55  
56  
57  
58  
59  
60

223 included article and the quality of the collective group of evidence from each of the 11 key  
224 concepts used to draft each recommendation using GRADE methodological quality criteria [24-  
225 28]. Two authors knowledgeable in HIV, aging and rehabilitation (AMT, KO) independently  
226 synthesized the extracted data using directed content analysis techniques [29] and formulated  
227 key themes surrounding rehabilitation assessment and treatment that informed the  
228 recommendations. One author (KO) then drafted 25 preliminary recommendations by  
229 synthesizing results and conclusions from each collective group of evidence. Subsequently, two  
230 authors (PS, KO) met to review the accuracy of the content analysis and collectively agreed on  
231 preliminary evidence-informed recommendations specific to HIV, aging and rehabilitation.

232 *Stream B - High level evidence on rehabilitation interventions for common comorbidities*

Formatted: Highlight

233 We grouped Stream B evidence by comorbidity experienced by older adults living with HIV,  
234 followed by the respective intervention. We classified the evidence based on 11 areas (bone  
235 and joint disorders; cancer; stroke; cardiovascular disease (CVD); mental health challenges;  
236 cognitive impairments; Parkinson's Disease; chronic obstructive pulmonary disease (COPD);  
237 diabetes; older adults; HIV) (Figure 1). We assessed the methodological quality of each article,  
238 and the quality of evidence from each collective area of focus used to draft each  
239 recommendation using the GRADE criteria [24-28]. Two authors (KO, AMT) independently  
240 synthesized the recommendations from the meta-analyses and systematic reviews using  
241 directed content analysis techniques [29] surrounding assessment, treatment intervention,  
242 intensity, progression of intensity, and health outcomes for each comorbidity. One author (KO)  
243 then drafted a total of 49 preliminary recommendations from the 115 included articles by  
244 synthesizing each collective group of study results and overall conclusions. Two authors (KO, PS)

1  
2  
3  
4  
5  
6  
7  
8  
9 245 met to review the accuracy of the synthesis to collectively determine preliminary evidence-  
10 246 informed recommendations for each of the comorbidities. The resulting 49 recommendations  
11 247 for Stream B spanned 11 areas of focus: bone and joint disorders (6 recommendations); cancer  
12 248 (8); stroke (12); CVD (7); mental health challenges (4); cognitive impairments (3); Parkinson's  
13 249 disease (1); COPD (4); diabetes (1); older adults (2); and HIV (1).

14  
15  
16  
17  
18  
19  
20 250 **PHASE 2 – Research Team GRADING of Recommendations and Incorporating Values and**  
21 251 **Preferences among PLHIV and Clinicians (Figure 2)**

22  
23  
24 252 We circulated the 74 preliminary recommendations to researchers, PLHIV and clinicians on the  
25 253 synthesis team in order to obtain GRADE ratings for the recommendations and incorporate  
26 254 individual experiences, values and preferences. For each recommendation, the team member  
27 255 indicated the GRADE rating incorporating both quality of the evidence and the extent to which  
28 256 the recommendation was applicable to older adults living with HIV. GRADE rating at this stage  
29 257 included four levels [24-28]: **High** – fully endorse or strongly recommended. This  
30 258 recommendation would be appropriate for the majority of older adults living with HIV,  
31 259 suggested wording of the recommendation would include; 'we should or should not do';  
32 260 **Moderate** – moderately endorse or recommend. This recommendation would be applicable to  
33 261 some older adults with HIV; **Low** - minimally endorse or weak recommendation. This  
34 262 recommendation would be applicable to a few older adults with HIV, with potential variability  
35 263 in values and preferences. Wording of this recommendation would include; 'we suggest, may  
36 264 recommend or may not recommend'; or **Very low** - do not endorse or do not recommend at all.  
37  
38  
39  
40  
41  
42  
43  
44  
45  
46  
47  
48  
49  
50 265 This recommendation would not be appropriate for older adults living with HIV.  
51  
52  
53  
54  
55  
56  
57  
58  
59  
60

1  
2  
3  
4  
5  
6  
7  
8  
9 266 This phase of GRADE rating required a trade-off between benefits and drawbacks, and  
10 267 values and principles of the PLHIV, clinician or researcher. Team members were asked to  
11 268 comment on their values and preferences related to the recommendation and how these  
12 269 influenced their rating. Team members also suggested revisions or refinement to the  
13 270 recommendation.

14  
15  
16  
17  
18  
19  
20 271 Collectively the evidence specific to HIV aging and rehabilitation (Stream A) was low to  
21 272 very low quality as much of the evidence consisted of cross-sectional qualitative or quantitative  
22 273 studies (with no comparison group) or narrative reviews. No [randomized-controlled trials](#)  
23 274 [\(RCTs\)](#) were included. Clinicians and PLHIV on the team incorporated their clinical expertise and  
24 275 experience, values and preferences, respectively, when determining their final GRADE rating.  
25  
26  
27  
28  
29 276 For Stream B given only systematic reviews or meta-analyses were included, the rating of the  
30 277 evidence was either very high or high. However, the GRADING of the recommendation  
31 278 depended on the extent to which the team felt the evidence was applicable to older adults with  
32 279 HIV and if the intervention posed minimal risk or harm to those living with HIV and these  
33 280 comorbidities.

1  
2  
3  
4  
5  
6  
7  
8  
9 281 **Phase 2 GRADE Results**

10  
11 282 The research team met twice to discuss the overall GRADE results, and recommendations for  
12  
13 283 revision (Research Team Meetings #2 and #3). In the latter meeting we summarized and  
14  
15 284 incorporated values and preferences of PLHIV and clinicians into the recommendations (Figure  
16  
17 285 2).

18  
19  
20 286 *Stream A - GRADE RATING RESULTS and REVISION*

21  
22  
23 287 We consolidated similar or overlapping recommendations and deleted those not highly  
24  
25 288 endorsed by the majority of the team. We also removed recommendations to specific  
26  
27 289 interventions with inconclusive evidence because of team concerns of endorsing specific  
28  
29 290 interventions over others under-reported in the research evidence.

30  
31  
32 291 Overall this process resulted in the deletion of eight articles. The remaining 42 articles  
33  
34 292 in Stream A yielded 16 evidence-informed recommendations for older adults with HIV that  
35  
36 293 spanned three themes: 1) implications for future education of rehabilitation professionals (1  
37  
38 294 recommendation); 2) approaches to rehabilitation assessment and treatment (14  
39  
40 295 recommendations); and 3) interventions (1 recommendation) (Figure 2).

41  
42 296 *Stream B - GRADE RATING RESULTS and REVISION*

43  
44  
45 297 Based on the GRADE rating of team members and our meeting discussions we revised the  
46  
47 298 Stream B recommendations. We deleted recommendations that were not endorsed by the  
48  
49 299 clinicians and PLHIV and recommendations that referred to conditions not common to HIV and  
50  
51 300 aging. Overall this process resulted in the removal of 6 articles. The remaining 109 articles in

1  
2  
3  
4  
5  
6  
7  
8  
9 301 Stream B yielded 40 evidence-informed recommendations that spanned the 10 areas: bone and  
10 302 joint disorders, cancer (general, lung and metastatic cancer), stroke, CVD (myocardial infarction,  
11 303 heart disease, heart failure), mental health challenges, cognitive impairment, COPD, diabetes,  
12 304 older adults and HIV/AIDS (Figure 2). Recommendations spanned interventions including  
13 305 exercise, rehabilitation, self-management, cognitive rehabilitation, pulmonary rehabilitation,  
14 306 electrotherapeutic modalities, cardiac rehabilitation, inspiratory muscle training,  
15 307 psychotherapy, models of care, and housing models.

22  
23  
24 308 **PHASE 3 - EXTERNAL ENDORSEMENT- Incorporating 'expert knowledge' from clinicians and**  
25 309 **adults living with HIV (Figure 3)**

26  
27  
28 310 We circulated the recommendations electronically to a broader group of 38 clinicians and PLHIV  
29 311 for external endorsement using an online survey. We asked participants whether they  
30 312 endorsed, did not endorse, or had no opinion about each recommendation. Participants were  
31 313 also invited to provide comments. We considered endorsement rates of >80%, 60-80%, and  
32 314 <60% as high, moderate and low levels of endorsement, respectively. Responses from this  
33 315 endorsement phase were incorporated into the final revision and refinement of the evidence-  
34 316 informed recommendations (Figure 3).

35  
36  
37  
38  
39  
40  
41  
42  
43 317 **External Endorsement Results:** Of the 38 PLHIV and clinicians invited to participate in the online  
44 318 endorsement survey, 19 (50%) completed the online survey. Of the 19 individuals who  
45 319 completed the endorsement survey, 9 (47%) were health professionals, 8 (42%) were PLHIV and  
46 320 2 (11%) were both a health professional and PLHIV. Health professionals included physicians

1  
2  
3  
4  
5  
6  
7  
8  
9 321 (geriatrics and infectious diseases) (27%), occupational therapists (27%), speech-language  
10 322 pathologists (27%) and social workers (18%).

11  
12 323 Rates of endorsement for each recommendation ranged from 47% (9/19 participants) to  
13 324 100% (19/19 participants). The number of participants who viewed the citations from which  
14  
15 325 the recommendations were derived ranged from three (16%) to 10 participants (53%).  
16  
17 326 Participants tended to highly endorse recommendations in Stream A and those in Stream B  
18  
19 327 related to exercise. Recommendations related to inconclusive evidence had lower rates of  
20  
21 328 endorsement. Endorsement participants highlighted how recommendations could be  
22  
23 329 applicable to any population (not just older adults with HIV). Others recommended highlighting  
24  
25 330 other interventions not captured in the recommendations, such as yoga or tai-chi. See Data  
26  
27 331 Supplement File 1 for an overview of the endorsement results.

28  
29 332 Two recommendations endorsed by <60% of participants were removed. The team  
30  
31 333 further synthesized the final 52 specific recommendations into eight overarching  
32  
33 334 recommendations on rehabilitation for older adults living with HIV. See Data Supplement File  
34  
35 335 2 for the **f**Final **e**Evidence-**i**nformed **r**Recommendations and Data Supplement File 3 for  
36  
37 336 characteristics of included studies in the final recommendations.

### 38 39 337 **Final Recommendations**

40  
41 338 Results of this synthesis are presented across two streams that represent the two different  
42  
43 339 bodies of research evidence totaling 52 specific recommendations (Data Supplement File 2).  
44  
45 340 We also present overarching recommendations derived from the specific detailed evidence-  
46  
47 341 informed recommendations on rehabilitation for older adults living with HIV (Table 1).  
48  
49  
50  
51  
52  
53  
54  
55  
56  
57  
58  
59  
60

1  
2  
3  
4  
5  
6  
7  
8  
9 342 *Specific (Detailed) Recommendations*

10 343 Stream A results include 16 recommendations derived from 42 research evidence articles  
11  
12 344 specific to rehabilitation for older adults living with HIV. The level of evidence from which these  
13  
14 345 recommendations were derived was either low or very low, meaning the articles were mostly  
15  
16 346 narrative review articles or descriptive studies (either qualitative or quantitative) with small  
17  
18 347 sample sizes. Although the studies were low level evidence, the PLHIV and clinician  
19  
20 348 endorsements indicated that these were of fundamental importance in management of  
21  
22 349 disability in older adults living with HIV. Stream A recommendations serve as the contextual  
23  
24 350 backdrop to providing rehabilitation care, treatment and support to older adults living with HIV.  
25  
26 351 Some of the recommendations have additional explanatory notes to further explain the context  
27  
28 352 and PLHIV and clinician values (Data Supplement File 2). The recommendations are organized  
29  
30 353 into six categories: A) preparedness of rehabilitation professionals; B) approaches to  
31  
32 354 rehabilitation assessment and treatment of older adults living with HIV; C) extrinsic factors to  
33  
34 355 consider with rehabilitation of older adults living with HIV; D) intrinsic factors to consider with  
35  
36 356 rehabilitation of older adults living with HIV; E) rehabilitation approaches; and F) rehabilitation  
37  
38 357 interventions (Data Supplement File 2).

39  
40  
41 358 | Stream B results include 36 recommendations derived from 108 moderate or high level  
42  
43 359 research evidence articles describing the effectiveness of rehabilitation interventions for adults  
44  
45 360 living with health conditions and include specific considerations when applying rehabilitation  
46  
47 361 interventions for older PLHIV (Figure 3). Stream B recommendations include an overview of  
48  
49 362 the prevalence of the condition among older adults with HIV, main health-related challenges  
50  
51 363 for older adults with HIV experiencing this condition from a rehabilitation perspective, study  
52  
53  
54  
55  
56  
57  
58  
59  
60

Formatted: Indent: First line: 0.5"



1  
2  
3  
4  
5  
6  
7  
8  
9 364 citations and level of evidence from which the recommendation was derived, age of  
10 365 participants included in the evidence (not all high level rehabilitation intervention evidence was  
11 366 specific to older adults). The recommendations include specific considerations for older adults  
12 367 with HIV. The recommendations are presented based on interventions across A) older adults, B)  
13 368 HIV/AIDS, and eight common comorbidities that may be experienced by older adults with HIV;  
14 369 C) bone and joint disorders, D) cancer, E) stroke, F) cardiovascular disease, G) mental health  
15 370 challenges, H) cognitive impairments, I) COPD and J) diabetes (Data Supplement File 2).

#### 23 371 *Overarching Recommendations*

24 372 To facilitate knowledge transfer and exchange, we established overarching recommendations  
25 373 that summarized the detailed recommendations in a condensed manner (Table 1). We  
26 374 consolidated the 52 specific recommendations into eight overarching recommendations on  
27 375 rehabilitation for older adults living with HIV. These recommendations were endorsed at a final  
28 376 team meeting and provide a broader overview of the evidence synthesis.

#### 37 377 **Table 1- Overarching Evidence-Informed Recommendations in Rehabilitation for Older Adults**

##### 38 378 **Living with HIV**

39 379 The following overarching recommendations provide a general guide to providing rehabilitation care,  
40 380 treatment and support with older adults living with HIV.

41 381

### Overarching Recommendations in Rehabilitation for Older Adults Living with HIV

Formatted Table

1. Rehabilitation professionals should be prepared to provide care to older adults with HIV who present with **complex comorbidities** affecting neurological, cardiorespiratory and musculoskeletal systems that may result in physical, mental and social health challenges.
2. Rehabilitation professionals should adopt an **individualized and interprofessional approach to practice** that is sensitive to the **unique values, preferences and needs of older adults with HIV**. This approach should include comprehensive assessment and treatment of **physical, neurocognitive and mental health impairments, uncertainty (or worrying about the future), functional activity limitations, and social exclusion** while considering the intersections between **personal and social attributes** and the **broader determinants of health**.
3. **Multidisciplinary rehabilitation** including physical therapy, occupational therapy and speech-language pathology is strongly recommended across the **continuum of care** (acute, rehabilitation and community-based care) for older adults with HIV to address the multi-dimensional and episodic nature of disability attributed to HIV and its comorbidities such as bone and joint disorders, cancer, stroke, cardiovascular disease, mental health, cognitive impairment, chronic obstructive pulmonary disease (COPD) and diabetes.
4. Rehabilitation professionals should consider the role of **extrinsic contextual factors** such as stigma and ageism, HIV disclosure, and emotional and practical social supports on the health and well-being of older adults living with HIV.
5. Rehabilitation professionals should consider the role of **intrinsic contextual factors** such as self-management and spirituality on the health and well-being of older adults living with HIV.
6. A **combination of aerobic and resistive exercise** may be recommended for older adults living with HIV who are medically stable and living with comorbidities including bone and joint disorders, cancer, stroke, cardiovascular disease, stroke, mental health, cognitive impairment, chronic obstructive pulmonary disease (COPD), and diabetes. The frequency, intensity, time and type of exercise should be individually tailored to the specific goals and capacity of the individual and the specific co-morbidity.
7. **Cognitive rehabilitation interventions** (e.g. cognitive training, cognitive stimulation, cognitive rehabilitation) may be recommended for older adults living with HIV with mild cognitive impairment, and stroke. Inconclusive or insufficient evidence exists to support the use of **cognitive behavioural therapy** with older adults with HIV with **depression**. While cognitive rehabilitation does not appear harmful, weak evidence exists to support the use of cognitive-specific interventions to improve spatial neglect, disability, memory, and functional status for

1  
2  
3  
4  
5  
6  
7  
8  
9  
10  
11  
12  
13  
14  
15  
16  
17  
18  
19  
20  
21  
22  
23  
24  
25  
26  
27  
28  
29  
30  
31  
32  
33  
34  
35  
36  
37  
38  
39  
40  
41  
42  
43  
44  
45  
46  
47  
48  
49  
50  
51  
52  
53  
54  
55  
56  
57  
58  
59  
60

older adults who experience stroke. Rehabilitation professionals are encouraged to refer to specific clinical practice guidelines for each health condition to determine the effects of different cognitive interventions for older adults with HIV living with comorbidity.

8. In the absence of high level evidence on rehabilitation interventions for older adults living with HIV and comorbidities, rehabilitation professionals should refer to **existing clinical practice guidelines, systematic reviews, meta-analyses, and other forms of high level evidence for recommendations on interventions for a specific comorbidity**. These recommendations should be applied using an individualized approach incorporating the unique values, preferences, goals and needs of the individual.

382

## 383 DISCUSSION

384 We developed evidence-informed recommendations for rehabilitation with older adults living  
385 with HIV using a complex knowledge synthesis of two distinct areas of literature while  
386 incorporating PLHIV and clinician preferences throughout. To our knowledge, these are the first  
387 evidence-informed recommendations for rehabilitation developed specifically for older adults  
388 with HIV.

389 These recommendations may be useful for rehabilitation clinicians who have not  
390 worked with PLHIV and HIV specialists unfamiliar with rehabilitation who need an  
391 understanding of evidence-informed rehabilitation so that they can make appropriate referrals  
392 for their older clients living with HIV. Stream A recommendations were derived from very low  
393 level evidence and result in general statements. Nevertheless, we feel these recommendations  
394 are useful in addressing an overall approach to working with older adults with HIV. The low  
395 level of evidence derived from this area of literature highlights the paucity of evidence specific  
396 to rehabilitation for older adults with HIV and indicates the need for increased work in this  
397 area. While our focus was with older adults with HIV, many of the Stream B recommendations

Formatted: Highlight

1  
2  
3  
4  
5  
6  
7  
8  
9  
10  
11  
12  
13  
14  
15  
16  
17  
18  
19  
20  
21  
22  
23  
24  
25  
26  
27  
28  
29  
30  
31  
32  
33  
34  
35  
36  
37  
38  
39  
40  
41  
42  
43  
44  
45  
46  
47  
48  
49  
50  
51  
52  
53  
54  
55  
56  
57  
58  
59  
60

398 were derived from evidence not specific to older adults. The wording of our recommendations  
399 depended on how well, or to what extent we could make the 'leap' from the condition-specific  
400 evidence to a recommendation for rehabilitation specific to older adults living with HIV ~~with~~  
401 ~~and~~ these comorbidities. We included an overview of the prevalence of the comorbidities  
402 among older adults with HIV to assist clinicians in implementing the recommendations among  
403 adults with HIV living with comorbidities [30]. The supportive notes that augment the  
404 recommendations were derived primarily from PLHIV and clinician values and preferences to  
405 help ~~to~~ situate the recommendation into the context of older adults with HIV. Rehabilitation  
406 professionals often tailor treatment strategies to address the consequences of disease  
407 (disability) ~~framed with using goal setting, and~~ an individualized ~~goal setting~~ approach  
408 ~~considering that considers~~ the unique health and social challenges experienced by older adults  
409 with HIV. In the absence of high level evidence on rehabilitation interventions specific to older  
410 adults with HIV, clinicians may refer to the existing guidelines for the specific comorbidity, and  
411 incorporate an individualized approach to assessment and treatment.

412 We chose to present a combination of specific and overarching recommendations to  
413 guide rehabilitation for older adults with HIV. Those working with older adults with a specific  
414 comorbidity may find the detailed recommendations useful to their practice. Although specific  
415 recommendations are more likely to be followed [31], we feel the consolidated (overarching)  
416 recommendations may be useful to health providers less familiar working in HIV care and well-  
417 suited for knowledge translation to a broader health provider audience and community-based  
418 organizations.

Formatted: Highlight

Formatted: Highlight

Formatted: Highlight

Formatted: Highlight

Formatted: Highlight

Formatted: Highlight

1  
2  
3  
4  
5  
6  
7  
8  
9 419 Overall strengths of our approach included our unique synthesis of two distinct areas of  
10 420 literature combining lower level evidence on emerging issues of HIV and aging with higher level  
11 421 evidence on comorbidities commonly experienced by PLHIV to provide a strong foundation for  
12 422 the development of evidence-informed recommendations. We used a systematic approach to  
13 423 identifying literature, determining inclusion, data extraction, and drafting and refining the  
14 424 recommendations. We drafted the recommendations to include clear actionable and precise  
15 425 terminology, associated with the level of evidence available. We included specific citations  
16 426 from which the recommendation was derived so readers may refer to the original evidence  
17 427 source of the recommendation [32].  
18  
19  
20  
21  
22  
23  
24  
25  
26  
27

28 428 Our interprofessional and community-integrated approach involving 'expert' older  
29 429 PLHIV and clinicians brought a diverse group of stakeholders together on numerous occasions  
30 430 to engage in the iterative process of recommendation development, review and refinement  
31 431 and ensured the recommendations were practical and relevant to the HIV community. External  
32 432 endorsement further integrated PLHIV and clinician preferences into assessing the feasibility  
33 433 and refinement of recommendations for use in HIV practice [30]. Knowledge, values and  
34 434 experiences of clinicians and PLHIV were integral into the development of the  
35 435 recommendations, particularly when determining the relevance or unique considerations when  
36 436 devising recommendations from evidence derived from other chronic conditions. **Our**  
37 437 **community engaged approach involved PLHIV as members of the core research team, as well as**  
38 438 **participants in the external endorsement phase. This form of community-academic-clinical**  
39 439 **research partnership is of growing in prominence and strength of our approach as because it**  
40  
41  
42  
43  
44  
45  
46  
47  
48  
49  
50  
51  
52  
53  
54  
55  
56  
57  
58  
59  
60

Formatted: Highlight

Formatted: Highlight

1  
2  
3  
4  
5  
6  
7  
8  
9 440 strengthens the potential for effective knowledge transfer and exchange becomes central to  
10 health research [33].

Formatted: Highlight

Formatted: Highlight

Formatted: Highlight

11  
12  
13  
14 442 Challenges of this synthesis included combining two areas of research evidence that  
15 443 differed in quality and context. We chose to retain two parallel but distinct syntheses  
16 444 presented as one collective set of recommendations enabling us to synthesize emerging lower  
17 445 level evidence on HIV aging and rehabilitation with higher level more established evidence in  
18 446 chronic diseases experienced by older adults with HIV [34]. Much of the evidence from which  
19 447 these recommendations were derived is from the United States, hence the generalizability of  
20 448 these recommendations to other contexts is unknown. The lack of high level Stream A  
21 449 evidence specific to HIV, aging and rehabilitation resulted in high level considerations when  
22 450 working with older adults with HIV, and emphasize the need for further rehabilitation  
23 451 intervention research specific to older adults with HIV. Disparities emerged among evidence  
24 452 considered weak by GRADE definition, but essential to the values and preferences of PLHIV and  
25 453 clinicians. We were uncertain how to weight the research evidence with PLHIV and clinician  
26 454 values and preferences in order to establish the strength of a given recommendation. We chose  
27 455 to remove recommendations for rehabilitation approaches with weak evidence that were not  
28 456 highly endorsed by the majority of team members. Finally, these evidence-informed  
29 457 recommendations do not specifically address the issue of caregiving, respite and potential  
30 458 caregiver burnout, important issues that should be considered by clinicians in the context of  
31 459 HIV and aging [35].  
32  
33  
34  
35  
36  
37  
38  
39  
40  
41  
42  
43  
44  
45  
46  
47  
48  
49  
50  
51  
52  
53  
54  
55  
56  
57  
58  
59  
60

1  
2  
3  
4  
5  
6  
7  
8  
9 460 The development of these recommendations is timely given the changing demographic  
10  
11 461 of adults aging with HIV. These recommendations directly address key research priorities on  
12  
13 462 comorbidities and access to rehabilitation identified in a national scoping study of the Canadian  
14  
15 463 Working Group on HIV and Rehabilitation (CWGHR) [36]. Our recommendations also address  
16  
17 464 key issues related to HIV, rehabilitation and aging that emerged from a national consultation  
18  
19 465 with PLHIV, researchers, educators, clinicians, and policy stakeholders by CWGHR including  
20  
21 466 comorbidities experienced by older PLHIV and social determinants of health [37]. These issues  
22  
23 467 similarly emerged from the external endorsement whereby participants also indicated the  
24  
25 468 importance of end of life care [38], lifestyle modifications including adoption of exercise and  
26  
27 469 yoga [39, 40], and smoking cessation among older adults with HIV [41] as critical to consider in  
28  
29 470 the care and prevention strategies to enhance health for older PLHIV. Moreover, while  
30  
31 471 evidence describes potential benefits of supplements used in osteoarthritis [42], or central  
32  
33 472 nervous stimulants to alleviate HIV-associated cognitive impairments and fatigue [43, 44], the  
34  
35 473 focus of these rehabilitation recommendations were non-pharmacological in nature. We  
36  
37 474 developed these recommendations in accordance with the principles outlined by CWGHR for  
38  
39 475 the development of guidelines for rehabilitation in HIV [45]. Merging the traditionally separate  
40  
41 476 areas of rehabilitation, HIV and disability, enabled us to create evidence-informed  
42  
43 477 recommendations that are relevant for rehabilitation in the context of HIV and provide clear  
44  
45 478 actionable recommendations that could direct future practice [45].

47  
48 479 Limitations of this research included the qualitative nature of the synthesis whereby we  
49  
50 480 were unable to pool results from included studies into meta-analyses. Given our approach to  
51  
52 481 identify comorbidities, we may have missed other high level evidence on rehabilitation

Formatted: Highlight

Formatted: Highlight

Formatted: Highlight



1  
2  
3  
4  
5  
6  
7  
8  
9 482 interventions such as fall prevention or balance training that may not be specific to our pre-  
10 483 determined comorbidities but may be employed with older adults living with multiple  
11  
12 484 comorbidities. Rehabilitation interventions clinicians use in practice beneficial to older adults  
13  
14  
15 485 with HIV may not have been captured in this synthesis due to the paucity of HIV and aging  
16  
17 486 literature (Stream A) or due to their lack of high level of evidence (Stream B). **Finally, HIV-**  
18  
19 487 **specific evidence on rehabilitation for older adults with HIV continues to emerge since we**  
20  
21 488 **conducted our literature search for included studies in 2011.- Recent evidence suggests**  
22  
23 489 **cognitive rehabilitation interventions such as computerized speed of processing training and**  
24  
25 490 **self-generation strategies can enhance verbal recall, and cognitive function among older adults**  
26  
27 491 **with HIV, and that interventions to promote self-efficacy and social support may enhance**  
28  
29 492 **health-related quality of life among older men with HIV [46-49].** Ongoing revision of the  
30  
31 493 recommendations will be required to reflect the emerging evidence and changing needs of  
32  
33 494 older adults living with HIV.

## 495 CONCLUSIONS

37 496 We established eight overarching and 52 specific evidence-informed recommendations from a  
38  
39 497 combination of low level evidence specific to HIV, aging and rehabilitation and high level  
40  
41 498 research evidence describing the effectiveness of rehabilitation interventions for adults living  
42  
43 499 with comorbidities experienced by older adults with HIV. PLHIV and clinician values and  
44  
45 500 preferences were integral in developing these recommendations. Recommendations address  
46  
47 501 approaches to rehabilitation assessment and interventions, and contextual factors to consider  
48  
49 502 with rehabilitation of older adults living with HIV. These evidence-informed recommendations  
50  
51 503 provide a guide for rehabilitation with older PLHIV.

Formatted: Highlight

Formatted: Highlight

Formatted: Highlight

Formatted: Highlight

1  
2  
3  
4  
5  
6  
7  
8  
9 50410 505 **AUTHORS' CONTRIBUTIONS**

11 506 KO and PS led the conceptual design of the study, acquisition of funding, conducted the  
12 507 synthesis, and drafted the manuscript. KO, PS, AMT, DM, and BT reviewed evidence for  
13 508 inclusion; KO, PS, BT, AMT, and DM extracted data from included studies; KO, AMT, PS, and BT,  
14 509 conducted the initial methodological quality assessment and primary synthesis; LB, BT, DM, AC,  
15 510 WC, GR, JW, and TT were involved in the review and GRADING of the recommendations,  
16 511 analytical interpretations, endorsement, and refinement of the recommendations. JM provided  
17 512 overall guidance on the synthesis methodology. EZ was the principal knowledge user and  
18 513 advised on the overall development and process for future translation of the  
19 514 recommendations. All authors read and approved the final manuscript.

20  
21  
22  
23  
24  
25  
26  
27  
28  
29  
30  
31 51532  
33 516 **ACKNOWLEDGEMENTS**

34 517 We gratefully acknowledge Elizabeth Uleryk (Hospital for Sick Children) for her role in the  
35 518 search strategy; Ken King (Canadian Working Group on HIV and Rehabilitation) and Sheila  
36 519 Thomas (St. Michael's Hospital) for their role as knowledge users in earlier phases of this work;  
37 520 Jenn Jimmo for her role in data extraction, Nicole Gervais for her involvement in the  
38 521 implementation of the endorsement survey, and Nkem Iku for her involvement in the literature  
39 522 review, endorsement survey summary, and the formatting of the recommendations. We also  
40 523 thank David Vance and Debra Henninger, authors of included evidence who graciously provided  
41 524 additional information for this synthesis.

1  
2  
3  
4  
5  
6  
7  
8  
9 525 We acknowledge the following individuals for their involvement in the endorsement  
10  
11 526 phase of the recommendations development: Colleen Price, Glyn Townson (Canadian Working  
12  
13 527 Group on HIV and Rehabilitation), Rob Alexander (HIVER Consulting), Charles Furlotte (Hamilton  
14  
15 528 Health Sciences Centre, McMaster University), Dawn James (Nine Circles Community Health  
16  
17 529 Centre), Francisco Ibáñez-Carrasco (Ontario HIV Treatment Network), Gordon Arbess (St.  
18  
19 530 Michael's Hospital), Bani Ahuja (Occupational Therapist), Michael Hamilton, Evan Collins  
20  
21 531 (Department of Psychiatry, University of Toronto), and Murray Jose (Toronto People With AIDS  
22  
23 532 Foundation).

24  
25 533

#### 26 27 534 **COMPETING INTERESTS**

28  
29 535 The authors have no competing interests to declare.  
30  
31

32 536

#### 33 34 537 **FUNDING**

35  
36 538 This research was funded by a Canadian Institutes of Health Research (CIHR) Knowledge  
37  
38 539 Synthesis grant (Fund # 108046). At the time of this study, Kelly O'Brien was funded by a  
39  
40 540 Fellowship from the CIHR and a Michael DeGroote Postdoctoral Fellowship (McMaster  
41  
42 541 University). Kelly is funded by a CIHR New Investigator Award, HIV/AIDS Research Initiative.  
43

44 542

45 543

#### 46 47 544 **DATA SUPPLEMENT FILES (WEB ONLY)**

48  
49 545 Data Supplement File 1 – External Endorsement Results  
50  
51  
52  
53  
54

1  
2  
3  
4  
5  
6  
7  
8  
9  
10  
11  
12  
13  
14  
15  
16  
17  
18  
19  
20  
21  
22  
23  
24  
25  
26  
27  
28  
29  
30  
31  
32  
33  
34  
35  
36  
37  
38  
39  
40  
41  
42  
43  
44  
45  
46  
47  
48  
49  
50  
51  
52  
53  
54  
55  
56  
57  
58  
59  
60

- 546 Data Supplement File 2 - Evidence Informed Recommendations in Rehabilitation for Older
- 547 Adults Living with HIV
- 548 Data Supplement File 3 - Characteristics of Included Studies in the Evidence-Informed
- 549 Recommendations in Rehabilitation for Older Adults Living with HIV

For peer review only

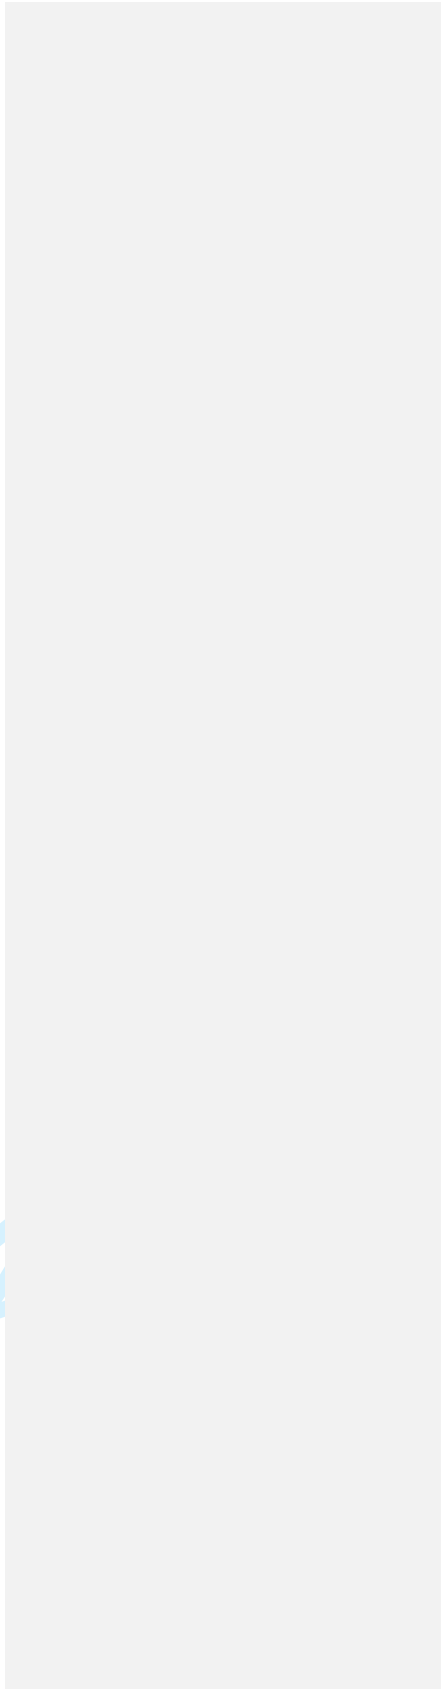

1  
2  
3  
4  
5  
6  
7  
8  
9  
10  
11  
12  
13  
14  
15  
16  
17  
18  
19  
20  
21  
22  
23  
24  
25  
26  
27  
28  
29  
30  
31  
32  
33  
34  
35  
36  
37  
38  
39  
40  
41  
42  
43  
44  
45  
46  
47  
48  
49  
50  
51  
52  
53  
54  
55  
56  
57  
58  
59  
60

## 550 REFERENCES

- 551 1. Kirk JB, Goetz MB. Human immunodeficiency virus in an aging population, a  
552 complication of success. *J Am Geriatr Soc* 2009;57:2129-2138.
- 553 2. Oursler KK, Goulet JL, Leaf DA, et al. Association of comorbidity with physical disability in  
554 older HIV-infected adults. *AIDS Patient Care STDS* 2006;20:782-791.
- 555 3. Weiss JJ, Osorio G, Ryan E, et al. Prevalence and patient awareness of medical  
556 comorbidities in an urban AIDS clinic. *AIDS Patient Care STDS* 2010;24:39-48.
- 557 4. Willard S, Holzemer WL, Wantland DJ, et al. Does "asymptomatic" mean without  
558 symptoms for those living with HIV infection? *AIDS Care* 2009;21:322-328.
- 559 5. O'Brien KK, Bayoumi AM, Strike C, et al. Exploring disability from the perspective of  
560 adults living with HIV/AIDS: development of a conceptual framework. *Health Qual Life*  
561 *Outcomes* 2008;6:76.
- 562 6. Rusch M, Nixon S, Schilder A, et al. Impairments, activity limitations and participation  
563 restrictions: prevalence and associations among persons living with HIV/AIDS in British  
564 Columbia. *Health Qual Life Outcomes* 2004;2:46.
- 565 7. Rusch M, Nixon S, Schilder A, et al. Prevalence of activity limitation among persons living  
566 with HIV/AIDS in British Columbia. *Can J Public Health* 2004;95:437-440.
- 567 8. Vance DE, Mugavero M, Willig J, et al. Aging With HIV: A Cross-Sectional Study of  
568 Comorbidity Prevalence and Clinical Characteristics Across Decades of Life. *J Assoc*  
569 *Nurses AIDS Care* 2011; 22:17-25.
- 570 9. Brown TT, McComsey GA. Osteopenia and osteoporosis in patients with HIV: a review of  
571 current concepts. *Curr Infect Dis Rep* 2006;8:162-170.

- 1  
2  
3  
4  
5  
6  
7  
8  
9 572 10. Heaton RK, Clifford DB, Franklin DR, Jr., et al. HIV-associated neurocognitive disorders  
10 573 persist in the era of potent antiretroviral therapy: CHARTER Study. *Neurology*  
11 574 2011;75:2087-2096.
- 12  
13 575 11. Shiels MS, Cole SR, Kirk GD, et al. A meta-analysis of the incidence of non-AIDS cancers  
14 576 in HIV-infected individuals. *J Acquir Immune Defic Syndr* 2009;52:611-622.
- 15 577 12. Heckman TG, Heckman BD, Kochman A, et al. Psychological symptoms among persons  
16 578 50 years of age and older living with HIV disease. *Aging & Mental Health* 2002;6:121-  
17 579 128.
- 18  
19 580 13. Grov C, Golub SA, Parsons JT, et al. Loneliness and HIV-related stigma explain depression  
20 581 among older HIV-positive adults. *AIDS Care* 2010;22:630-639.
- 21 582 14. Vance DE, Woodley RA. Strengths and distress in adults who are aging with HIV: a pilot  
22 583 study. *Psychol Rep* 2005;96:383-386.
- 23 584 15. Oursler KK, Sorkin JD, Smith BA, et al. Reduced aerobic capacity and physical functioning  
24 585 in older HIV-infected men. *AIDS Res Hum Retroviruses* 2006;22:1113-1121.
- 25 586 16. Oursler KK, Goulet JL, Crystal S, et al. Association of age and comorbidity with physical  
26 587 function in HIV-infected and uninfected patients: results from the Veterans Aging Cohort  
27 588 Study. *AIDS Patient Care STDS* 2011;25:13-20.
- 28 589 17. Worthington C, Myers T, O'Brien K, et al. Rehabilitation in HIV/AIDS: development of an  
29 590 expanded conceptual framework. *AIDS Patient Care STDS* 2005;19:258-271.
- 30 591 18. Jolliffe JA, Rees K, Taylor RS, et al. Exercise-based rehabilitation for coronary heart  
31 592 disease. *Cochrane Database Syst Rev* 2001:CD001800.

1  
2  
3  
4  
5  
6  
7  
8  
9  
10  
11  
12  
13  
14  
15  
16  
17  
18  
19  
20  
21  
22  
23  
24  
25  
26  
27  
28  
29  
30  
31  
32  
33  
34  
35  
36  
37  
38  
39  
40  
41  
42  
43  
44  
45  
46  
47  
48  
49  
50  
51  
52  
53  
54  
55  
56  
57  
58  
59  
60

- 593 19. Saunders DH, Greig CA, Mead GE, et al. Physical fitness training for stroke patients. *Cochrane Database Syst Rev* 2009:CD003316.
- 594
- 595 20. Cramp F, Daniel J. Exercise for the management of cancer-related fatigue in adults. *Cochrane Database Syst Rev* 2008:CD006145.
- 596
- 597 21. Worthington C, Myers T, O'Brien K, et al. Rehabilitation professionals and human immunodeficiency virus care: results of a national Canadian survey. *Arch Phys Med Rehabil* 2008;89:105-113.
- 598
- 599
- 600 22. van der Weijden T, Legare F, Boivin A, et al. How to integrate individual patient values and preferences in clinical practice guidelines? A research protocol. *Implement Sci* 2010;5:10.
- 601
- 602
- 603 23. Higgins J, Green S. Cochrane Handbook for Systematic Reviews of Interventions. The Cochrane Collaboration. Version 5.0.2 [updated September 2009]. 2009.
- 604
- 605 24. Atkins D, Best D, Briss PA, et al. Grading quality of evidence and strength of recommendations. *Bmj* 2004;328:1490.
- 606
- 607 25. Guyatt G, Gutterman D, Baumann MH, et al. Grading strength of recommendations and quality of evidence in clinical guidelines: report from an american college of chest physicians task force. *Chest* 2006;129:174-181.
- 608
- 609
- 610 26. Brozek JL, Akl EA, Alonso-Coello P, et al. Grading quality of evidence and strength of recommendations in clinical practice guidelines. Part 1 of 3. An overview of the GRADE approach and grading quality of evidence about interventions. *Allergy* 2009;64:669-677.
- 611
- 612
- 613 27. Brozek JL, Akl EA, Jaeschke R, et al. Grading quality of evidence and strength of recommendations in clinical practice guidelines: Part 2 of 3. The GRADE approach to
- 614



- 1  
2  
3  
4  
5  
6  
7  
8  
9 615 grading quality of evidence about diagnostic tests and strategies. *Allergy* 2009;64:1109-  
10 616 1116.  
11  
12  
13 617 28. Brozek JL, Akl EA, Compalati E, et al. Grading quality of evidence and strength of  
14 618 recommendations in clinical practice guidelines part 3 of 3. The GRADE approach to  
15 619 developing recommendations. *Allergy* 2011;66:588-595.  
16  
17  
18  
19 620 29. Hsieh HF, Shannon SE. Three approaches to qualitative content analysis. *Qual Health Res*  
20 621 2005; 15:1277-1288.  
21  
22  
23 622 30. Shekelle P, Woolf S, Grimshaw JM, et al. Developing clinical practice guidelines:  
24 623 reviewing, reporting, and publishing guidelines; updating guidelines; and the emerging  
25 624 issues of enhancing guideline implementability and accounting for comorbid conditions  
26 625 in guideline development. *Implement Sci* 2012;7:62.  
27  
28  
29  
30  
31 626 31. Grol R, Dalhuijsen J, Thomas S, et al. Attributes of clinical guidelines that influence use of  
32 627 guidelines in general practice: observational study. *Bmj* 1998;317:858-861.  
33  
34  
35 628 32. Woolf S, Schunemann HJ, Eccles MP, et al. Developing clinical practice guidelines: types  
36 629 of evidence and outcomes; values and economics, synthesis, grading, and presentation  
37 630 and deriving recommendations. *Implement Sci* 2012;7:61.  
38  
39  
40  
41 631 33. Rhodes SD, Malow RM, Jolly C. Community-based participatory research: a new and not-  
42 632 so-new approach to HIV/AIDS prevention, care, and treatment. *AIDS Educ Prev*  
43 633 2010;22:173-183.  
44  
45  
46  
47 634 34. Turner-Stokes L. Evidence for the effectiveness of multi-disciplinary rehabilitation  
48 635 following acquired brain injury: a synthesis of two systematic approaches. *J Rehabil Med*  
49 636 2008;40:691-701.  
50  
51  
52  
53  
54  
55  
56  
57  
58  
59  
60

1  
2  
3  
4  
5  
6  
7  
8  
9  
10  
11  
12  
13  
14  
15  
16  
17  
18  
19  
20  
21  
22  
23  
24  
25  
26  
27  
28  
29  
30  
31  
32  
33  
34  
35  
36  
37  
38  
39  
40  
41  
42  
43  
44  
45  
46  
47  
48  
49  
50  
51  
52  
53  
54  
55  
56  
57  
58  
59  
60

- 637 35. Emlet CA, Poindexter CC. Unserved, unseen, and unheard: integrating programs for HIV-  
638 infected and HIV-affected older adults. *Health Soc Work* 2004;29:86-96.
- 639 36. O'Brien K, Wilkins A, Zack E, Solomon P. Scoping the Field: Identifying Key Research  
640 Priorities in HIV and Rehabilitation. *AIDS Behav* 2010;14:448-458.
- 641 37. Canadian Working Group on HIV and Rehabilitation. Partners in Aging: Report on a  
642 national project on HIV and Aging. 2010.
- 643 38. Harding R, Karus D, Easterbrook P, et al. Does palliative care improve outcomes for  
644 patients with HIV/AIDS? A systematic review of the evidence. *Sex Transm Infect*  
645 2005;81:5-14.
- 646 39. Yahiaoui A, McGough EL, Voss JG. Development of evidence-based exercise  
647 recommendations for older HIV-infected patients. *J Assoc Nurses AIDS Care*  
648 2012;23:204-219.
- 649 40. Cade WT, Reeds DN, Mondy KE, et al. Yoga lifestyle intervention reduces blood pressure  
650 in HIV-infected adults with cardiovascular disease risk factors. *HIV Med* 2010;11:379-  
651 388.
- 652 41. Nahvi S, Cooperman NA. Review: the need for smoking cessation among HIV-positive  
653 smokers. *AIDS Educ Prev* 2009;21:14-27.
- 654 42. Salazar J, Bello L, Chavez M, et al. Glucosamine for Osteoarthritis: Biological Effects,  
655 Clinical Efficacy, and Safety on Glucose Metabolism. *Arthritis* 2014;2014:432463.
- 656 43. Breitbart W, Rosenfeld B, Kaim M, et al. A randomized, double-blind, placebo-controlled  
657 trial of psychostimulants for the treatment of fatigue in ambulatory patients with  
658 human immunodeficiency virus disease. *Arch Intern Med* 2001;161:411-420.

- 1  
2  
3  
4  
5  
6  
7  
8  
9 659 44. Hinkin CH, Castellon SA, Hardy DJ, et al. Methylphenidate improves HIV-1-associated  
10 660 cognitive slowing. *J Neuropsychiatry Clin Neurosci* 2001;13:248-254.  
11  
12  
13 661 45. O'Brien KK, Wilkins A, Zack E, et al. Developing clinical practice guidelines in HIV  
14 662 rehabilitation: process recommendations and guiding principles. *AIDS Educ Prev*  
15 663 2011;23:457-468.  
16  
17  
18  
19 664 46. Vance DE, Fazeli PL, Ross LA, et al. Speed of processing training with middle-age and  
20 665 older adults with HIV: a pilot study. *J Assoc Nurses AIDS Care* 2012;23:500-510.  
21  
22  
23 666 47. Weber E, Woods SP, Kellogg E, et al. Self-generation enhances verbal recall in individuals  
24 667 infected with HIV. *J Int Neuropsychol Soc* 2012;18:128-133.  
25  
26  
27 668 48. Weber E, Blackstone K, Woods SP. Cognitive neurorehabilitation of HIV-associated  
28 669 neurocognitive disorders: a qualitative review and call to action. *Neuropsychol Rev*  
29 670 2013;23:81-98.  
30  
31  
32  
33 671 49. Emlert CA, Fredriksen-Goldsen KI, Kim HJ. Risk and protective factors associated with  
34 672 health-related quality of life among older gay and bisexual men living with HIV disease.  
35 673 *Gerontologist* 2013;53:963-972.  
36  
37  
38  
39  
40 674  
41  
42 675  
43  
44  
45  
46  
47  
48  
49  
50  
51  
52  
53  
54  
55  
56  
57  
58  
59  
60

Figure 1: Overview of Knowledge Synthesis Procedure – Classification, Assessing Methodological Quality, Synthesis and Drafting Preliminary Recommendations (Phase 1)

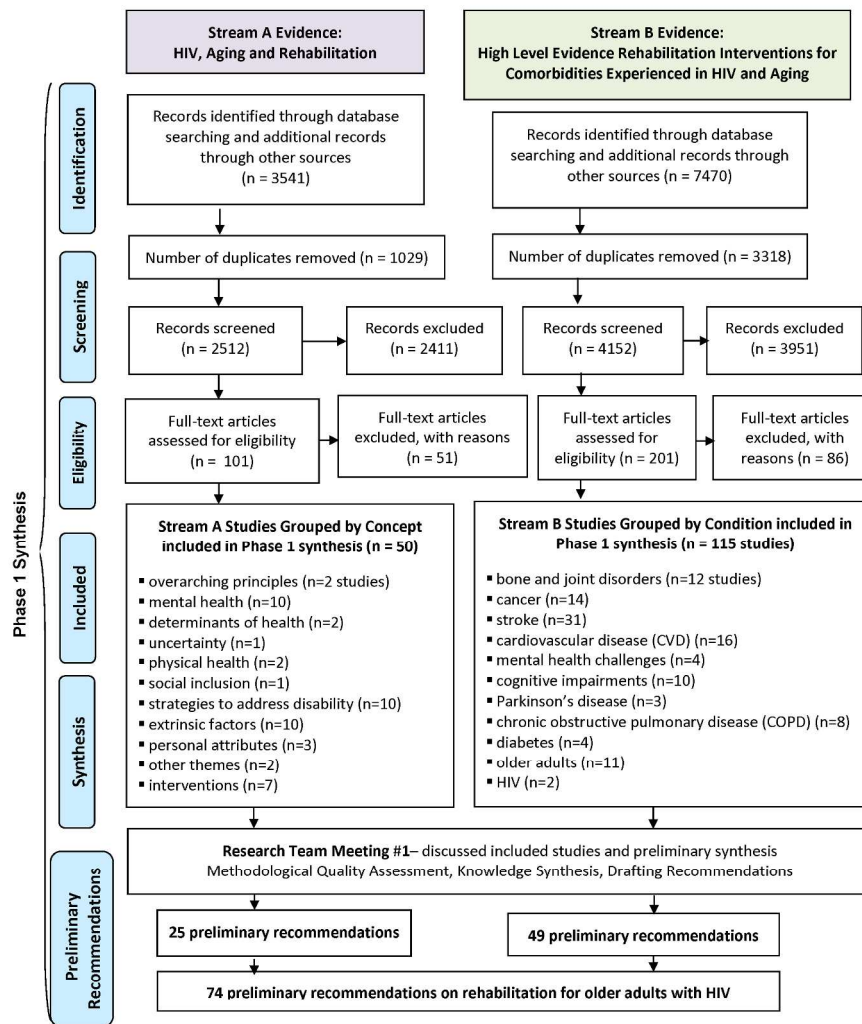

Overview of Knowledge Synthesis Procedure – Classification, Assessing Methodological Quality, Synthesis and Drafting Preliminary Recommendations (Phase 1)  
215x279mm (300 x 300 DPI)

1  
2  
3  
4  
5  
6  
7  
8  
9  
10  
11  
12  
13  
14  
15  
16  
17  
18  
19  
20  
21  
22  
23  
24  
25  
26  
27  
28  
29  
30  
31  
32  
33  
34  
35  
36  
37  
38  
39  
40  
41  
42  
43  
44  
45  
46  
47  
48  
49  
50  
51  
52  
53  
54  
55  
56  
57  
58  
59  
60

Figure 2: Overview of Knowledge Synthesis Procedure – Research Team GRADING of Recommendations and Incorporating Values and Preferences (Phase 2)

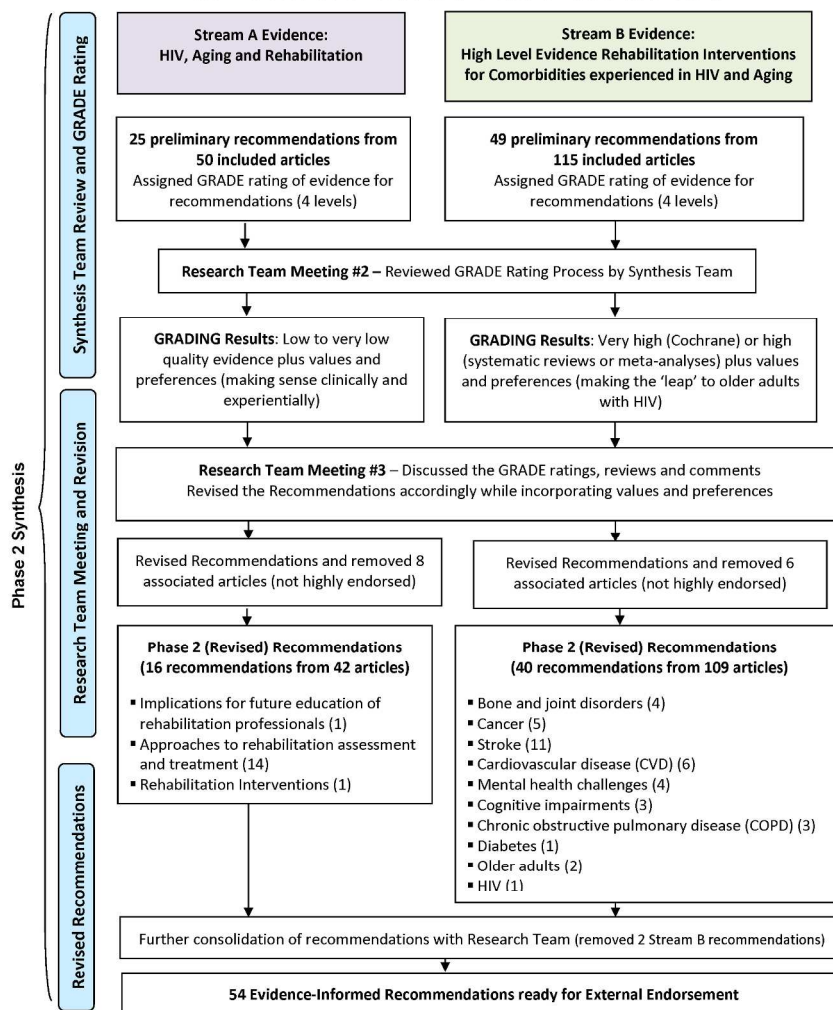

Overview of Knowledge Synthesis Procedure – Research Team GRADING of Recommendations and Incorporating Values and Preferences (Phase 2)  
215x279mm (300 x 300 DPI)

Figure 3: Overview of Knowledge Synthesis Procedure – External Endorsement (Phase 3)

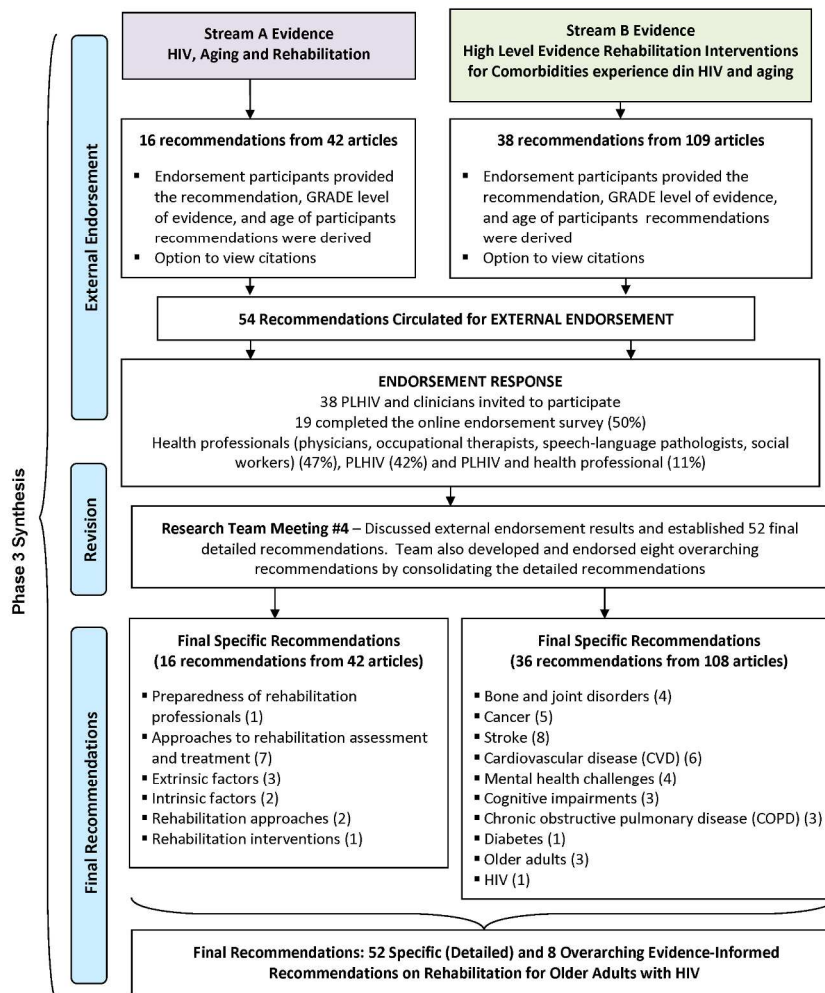

Overview of Knowledge Synthesis Procedure – External Endorsement (Phase 3)  
215x279mm (300 x 300 DPI)

## Data Supplement File 1 –External Endorsement Results- Evidence Informed Recommendations on Rehabilitation for Older Adults Living with HIV

Of the 38 PHAs and clinicians invited to participate, 19 (50%) completed the endorsement survey. Of the 19 individuals, 9 (47.4%) were health professionals, 8 (42.1%) were people living with HIV and 2 (10.5%) were both a health professional and a person living with HIV. Health professional type included physicians (geriatrics and infectious diseases) (15.8%), occupational therapists (15.8%), speech-language pathologist (or therapist) (10.5%) and social workers (15.8%). We considered endorsement rates of >80%, 60-80% and <60% as high, moderate and low, respectively.

~Table reflects the draft recommendations sent for endorsement; hence the numbering and recommendations differ from the final recommendations presented in the Data Supplement File 2 (Final Recommendations).

\*Indicates 1 missing response in level of endorsement

| Number~ | Draft Recommendation                                                                                                                                                                                                                                                           | Number of PLHIV and Clinicians who Endorsed the Recommendation (%) | # (%) who looked at Evidence Citations | Selected Comments from Endorsement Participants                                                                                                                                                                                                                                                                                                                                                                                                                                                                                                                                                                                                                                                                                                                                                                                                                                                                                                                                                                                            |
|---------|--------------------------------------------------------------------------------------------------------------------------------------------------------------------------------------------------------------------------------------------------------------------------------|--------------------------------------------------------------------|----------------------------------------|--------------------------------------------------------------------------------------------------------------------------------------------------------------------------------------------------------------------------------------------------------------------------------------------------------------------------------------------------------------------------------------------------------------------------------------------------------------------------------------------------------------------------------------------------------------------------------------------------------------------------------------------------------------------------------------------------------------------------------------------------------------------------------------------------------------------------------------------------------------------------------------------------------------------------------------------------------------------------------------------------------------------------------------------|
| 1       | Rehabilitation professionals should be prepared to provide care to older adults with HIV who present with <b>complex comorbidities</b> affecting neurological, cardiorespiratory and musculoskeletal systems that may result in physical, mental and social health challenges. | 19 (100)                                                           | 8 (42.1)                               | <p>Although many chronic illnesses lead to complex co-morbidities, HIV/AIDs brings with it stigma, secrecy and sometimes shame. Rehab professionals need to be prepared to adjust to this. Therefore rehab professionals need to be prepared to deal with HIV in particular.</p> <p>As a large part of the population living with HIV/AIDS ages, they encounter multiple complexities in daily life. The first step to preparing rehabilitation professions for this step would be a significantly greater understanding of the condition itself, and its impact on daily life. Rehab professionals have a large focus on aging issues as a part of their scope of practice anyway. Hence, understanding the complex comorbidities that accompany aging with HIV is not too much of an additional burden, but can go a mile when needed.</p> <p>A good understanding of some of the mental health aspects of long term HIV care would be a great help.</p> <p>It makes sense but have not seen many older patients get rehabilitation.</p> |



| Number~ | Draft Recommendation                                                                                                                                                                                                                                                                                                                                                                                                                                                                                                                                                                   | Number of PLHIV and Clinicians who Endorsed the Recommendation (%) | # (%) who looked at Evidence Citations | Selected Comments from Endorsement Participants                                                                                                                                                                                                                                                                                                                                                                                                                                                                                                                                                                                                                                                                                                                                                                                                                                                                                                                                                                                                  |
|---------|----------------------------------------------------------------------------------------------------------------------------------------------------------------------------------------------------------------------------------------------------------------------------------------------------------------------------------------------------------------------------------------------------------------------------------------------------------------------------------------------------------------------------------------------------------------------------------------|--------------------------------------------------------------------|----------------------------------------|--------------------------------------------------------------------------------------------------------------------------------------------------------------------------------------------------------------------------------------------------------------------------------------------------------------------------------------------------------------------------------------------------------------------------------------------------------------------------------------------------------------------------------------------------------------------------------------------------------------------------------------------------------------------------------------------------------------------------------------------------------------------------------------------------------------------------------------------------------------------------------------------------------------------------------------------------------------------------------------------------------------------------------------------------|
| 2       | <p>Rehabilitation professionals <u>should</u> adopt an individualized approach to assessment and treatment of older adults living with HIV to fully understand the <b>unique and complex needs of older adults with HIV</b>. This approach should consider the intersections between personal and social attributes (race, gender, sexual orientation, ethnocultural background and socioeconomic status) and the <b>broader determinants of health</b> (housing, access to health care, poverty, racism, financial supports, income support, education, work and parenting roles)</p> | 19 (100)                                                           | 7 (36.8)                               | <p>It's discouraging to see that evidence is low for many of these recommendations as we have now lived with HIV/AIDs for 30 years.</p> <p>Management of HIV/AIDS largely depends on personal factors such as resources and social support systems, as has been evident in my practice. Thus it is very important to apply an individualized approach to assessment and treatment, in order to provide the best client-centered care.</p> <p>Just as living with any other chronic illness, living with HIV/AIDS plays out very differently in individuals. In my practice, I have seen social support, socioeconomic status as well work status largely differ and impact clients differently. Hence it is very important to adapt an individualized approach.</p> <p>I personally think a unique approach is best in every rehab case.</p> <p>I endorse it however I feel that the above recommendation could and should be said about any individual patient or patient population.</p> <p>This is generally true for all rehab patients.</p> |
| 3       | <p>Rehabilitation professionals <u>should</u> consider assessing <b>diversity of physical and mental health outcomes during assessment</b>, which include but are not limited to outcomes of disability, quality of life, stress, coping, anxiety and depression, retirement and financial issues, sexual and familial relationships, loneliness and social networks, cognition, and daily function.</p>                                                                                                                                                                               | 19 (100)                                                           | 8 (42.1)                               | <p>Rehab professionals may need to be ready to refer an HIV+ client with any of the above concerns as he or she may not be addressing them as well as they could be addressed.</p> <p>There should be services ready to help back up the findings of the assessment. For example, if a new client is assessed as depressed what is the plan for next steps?</p> <p>Mental health issues as responses to societal oppression</p>                                                                                                                                                                                                                                                                                                                                                                                                                                                                                                                                                                                                                  |

| Number~ | Draft Recommendation                                                                                                                                                                                                                                                                              | Number of PLHIV and Clinicians who Endorsed the Recommendation (%) | # (%) who looked at Evidence Citations | Selected Comments from Endorsement Participants                                                                                                                                                                                                                                                                                                                                                                                                                                                                                                                                                                                                                                                                                                          |
|---------|---------------------------------------------------------------------------------------------------------------------------------------------------------------------------------------------------------------------------------------------------------------------------------------------------|--------------------------------------------------------------------|----------------------------------------|----------------------------------------------------------------------------------------------------------------------------------------------------------------------------------------------------------------------------------------------------------------------------------------------------------------------------------------------------------------------------------------------------------------------------------------------------------------------------------------------------------------------------------------------------------------------------------------------------------------------------------------------------------------------------------------------------------------------------------------------------------|
|         |                                                                                                                                                                                                                                                                                                   |                                                                    |                                        | I endorse it however I feel that the above recommendation could and should be said about any individual patient or patient population.                                                                                                                                                                                                                                                                                                                                                                                                                                                                                                                                                                                                                   |
| 4       | Rehabilitation professionals <b>should</b> assess both <b>physical impairment and functional activity</b> with older adults living with HIV given physical symptoms or impairments (such as limitations in aerobic capacity) may not always translate into challenges with functional activities. | 16 (84.2)                                                          | 9 (47.4)                               | <p>Having a focus on functional activities is especially important in regards to assessing independence and impact of HIV on aging.</p> <p>Being an occupational therapist, functional impact of any impairment is the chief focus of my practice. Just as other symptoms, any impairment can have different functional impacts within individuals depending on lifestyle and priorities.</p> <p>ADLs and IADLs are important aspects of a psychosocial assessment.</p> <p>I would think functional abilities and limitations would be of more interest/relevance to OTs vs. assessing aerobic capacity.</p> <p>We do this for all elderly rehab patients why would it be different for HIV.</p> <p>Interventions need to be holistic in all regards</p> |
| 5       | Rehabilitation professionals <u>should</u> incorporate mental health assessment and treatment into the care of older adults with HIV as they are at risk of experiencing low mood, anxiety, depression, and suicide ideation.                                                                     | 19 (100)                                                           | 7 (36.8)                               | <p>Substance use, concurrent disorders are tied into HIV population in general and I think should be mentioned here. Aging, HIV, chronic illness, mental illness can increase an older person's risk for substance use even have they have never had problems before. I think Assessment of concurrent disorders is important when looking at Mental Health.</p> <p>Extremely important based on my friends' experiences living with HIV/AIDS.</p>                                                                                                                                                                                                                                                                                                       |

| Number~ | Draft Recommendation                                                                                                                                                                                                                                                                                                                                                                                                                    | Number of PLHIV and Clinicians who Endorsed the Recommendation (%) | # (%) who looked at Evidence Citations | Selected Comments from Endorsement Participants                                                                                                                                                                                                                                                                                                                                                                                                                                                                                                                                                                                                                                                                                                                                                                                                                                                                                                                                                                                                                                                                                                                                                                                                                                                                                                                                                                                                                                                                                                                                                                         |
|---------|-----------------------------------------------------------------------------------------------------------------------------------------------------------------------------------------------------------------------------------------------------------------------------------------------------------------------------------------------------------------------------------------------------------------------------------------|--------------------------------------------------------------------|----------------------------------------|-------------------------------------------------------------------------------------------------------------------------------------------------------------------------------------------------------------------------------------------------------------------------------------------------------------------------------------------------------------------------------------------------------------------------------------------------------------------------------------------------------------------------------------------------------------------------------------------------------------------------------------------------------------------------------------------------------------------------------------------------------------------------------------------------------------------------------------------------------------------------------------------------------------------------------------------------------------------------------------------------------------------------------------------------------------------------------------------------------------------------------------------------------------------------------------------------------------------------------------------------------------------------------------------------------------------------------------------------------------------------------------------------------------------------------------------------------------------------------------------------------------------------------------------------------------------------------------------------------------------------|
| 6       | Rehabilitation professionals <u>should</u> conduct regular <b>neurocognitive screening</b> with older adults living with HIV, and where indicated, conduct complete assessments to identify early signs of HIV-associated executive functioning deficits (e.g. ability to keep appointments, adhere to medication regimens, and follow-up on recommendations) and interventions to effectively reduce or prevent cognitive impairments. | 16 (84.2)                                                          | 10 (52.6)                              | <p>Assessment and treatment in this area should be beyond the common understanding that PHAs experience episodes of depression; including social interactions, active daily living activities and other health related issues that may impact more broadly as people age - with or without a health issue.</p> <p>Since HIV/AIDS appears as more of a chronic condition in today's world, rather than a life threatening one, a lot of the symptoms have to be dealt with over a long period of time including access/intake of medications, management of side effects and maintaining relationships. All of which, much like other chronic conditions such as chronic pain, cancer, etc. can have an impact on the mental health of the person involved. Thus a focus on mental health assessment and treatment should be included.</p> <p>It is important to listen to every rehab client and to learn from them what their experience has been.</p> <p>Co-infected HIV/HCV may be at elevated risk for neurocognitive impairment.</p> <p>I agree but would recommend adding words "compensate" or "support" in addition to "prevent"/"reduce" as this may be the more realistic goal.</p> <p>I thought that there was significant evidence for early onset of cognitive impairments for many PHAs.</p> <p>Neurocognitive screening should be incorporated as standard practice in the treatment of HIV at all levels, and is currently often not addressed. This particularly needs to be incorporated in dealing with PHAs and aging.</p> <p>I had 1 patient with HIV CNS changes and this was very important.</p> |

| Number~ | Draft Recommendation                                                                                                                                                                                                                                                                  | Number of PLHIV and Clinicians who Endorsed the Recommendation (%) | # (%) who looked at Evidence Citations | Selected Comments from Endorsement Participants                                                                                                                                                                                                                                                                                                                                                                                                                                                                                                                                                                                                                                                                                                                                                                                                                                                                                                                                                                                                                                                                                                                                     |
|---------|---------------------------------------------------------------------------------------------------------------------------------------------------------------------------------------------------------------------------------------------------------------------------------------|--------------------------------------------------------------------|----------------------------------------|-------------------------------------------------------------------------------------------------------------------------------------------------------------------------------------------------------------------------------------------------------------------------------------------------------------------------------------------------------------------------------------------------------------------------------------------------------------------------------------------------------------------------------------------------------------------------------------------------------------------------------------------------------------------------------------------------------------------------------------------------------------------------------------------------------------------------------------------------------------------------------------------------------------------------------------------------------------------------------------------------------------------------------------------------------------------------------------------------------------------------------------------------------------------------------------|
| 7       | Rehabilitation professionals <u>should</u> be aware of the potential impact of <b>uncertainty</b> among older adults with HIV and the psychological importance for some older adults to know the source of their symptoms (age-related versus HIV-related versus medication-related). | 17 (89.5)                                                          | 8 (42.1)                               | <p>In my practice, I realized that neurocognitive issues were a significant part of my assessment and intervention strategies, as they impact many adults living with HIV. When you combine in the aging factor, this area becomes even more important to focus on.</p> <p>Life can be a roller coaster of unforeseen illnesses and impairments for PHAs.</p> <p>I would endorse this as one of strongest areas that needs to be looked at and addressed and very much like that it addresses age-related versus HIV or medication related as far too often this area is determined to be illness or treatment related.</p> <p>Uncertainty is a factor for maybe older clients.</p> <p>Yes! Symptom ambiguity is a key area of understanding lived experiences of this population.</p> <p>True - just as rehab professionals should be aware of uncertainty of all chronic illnesses.</p> <p>Without Blood level monitoring for HIV drugs how would this be informed information?</p> <p>While this generally may be relevant for other aging and health challenges, it is very unique and important in the context of HIV and needs to be properly acknowledged and addressed.</p> |
| 8       | Rehabilitation professionals <u>should</u> consider the risk of <b>social exclusion</b> older adults with HIV may face in relation to race, ethnicity, gender, and sexual orientation in their assessment.                                                                            | 18 (94.7)                                                          | 7 (36.8)                               | <p>Isolation seems to be common among those I know who are HIV+ or who have AIDS.</p> <p>It seems this statement neglects to consider the very real possibility of social exclusion based simply on HIV status.</p>                                                                                                                                                                                                                                                                                                                                                                                                                                                                                                                                                                                                                                                                                                                                                                                                                                                                                                                                                                 |

| Number~ | Draft Recommendation                                                                                                                                                                                | Number of PLHIV and Clinicians who Endorsed the Recommendation (%) | # (%) who looked at Evidence Citations | Selected Comments from Endorsement Participants                                                                                                                                                                                                                                                                                                                                                                                                                                                                                                                                                                                                                                                                                                                                                                                                                                                                                                                                                                                                                                                                                                                                                                                                                                                                                                                                                                                             |
|---------|-----------------------------------------------------------------------------------------------------------------------------------------------------------------------------------------------------|--------------------------------------------------------------------|----------------------------------------|---------------------------------------------------------------------------------------------------------------------------------------------------------------------------------------------------------------------------------------------------------------------------------------------------------------------------------------------------------------------------------------------------------------------------------------------------------------------------------------------------------------------------------------------------------------------------------------------------------------------------------------------------------------------------------------------------------------------------------------------------------------------------------------------------------------------------------------------------------------------------------------------------------------------------------------------------------------------------------------------------------------------------------------------------------------------------------------------------------------------------------------------------------------------------------------------------------------------------------------------------------------------------------------------------------------------------------------------------------------------------------------------------------------------------------------------|
| 9       | Rehabilitation professionals <u>should</u> be knowledgeable of <b>ageism</b> as an added layer of stigma that may increase existing HIV stigma and homophobia experienced by older adults with HIV. | 17 (89.5)                                                          | 10 (52.6)                              | <p>Perhaps HIV and age-related stigma should be included in the language here?</p> <p>Internalized HIV Stigma and personal view on Discrimination also feeds into this in a Major way Do I withdraw and Isolate??</p> <p>Perhaps this should also include a recommendation around assessing of social networks/supports.</p> <p>This is especially important with the MSM community as ageism is a problem in the community with HIV....</p> <p>Experiences with my own life and with those of friends when dealing with elderly parents has opened my eyes to the pervasiveness of family, friends, caregivers and health providers looking to what they call the best interests of the elderly and not to their expressed interests which have precedent in law.</p> <p>Ageism exists in rehab. It is unpleasant to experience it, and can be very dis-heartening.</p> <p>See previous comment- absolutely. Interweaving oppression. Language should reflect not additive "isms", but rather a multiplicative effect that mutually co-construct and reinforce each other.</p> <p>I think this applies to all elderly, not just HIV.</p> <p>As I get older I have become aware that there is little to no communication platform for younger and older Gays and as an older gay man it has been hammered in to me about the appropriateness of these relationships, often I am left feeling like I am a predator rather than an Elder.</p> |

| Number~ | Draft Recommendation                                                                                                                                                                                                                                                                               | Number of PLHIV and Clinicians who Endorsed the Recommendation (%) | # (%) who looked at Evidence Citations | Selected Comments from Endorsement Participants                                                                                                                                                                                                                                                                                                                                                                                                                                                                                                                                                                                                                                                                                                                                                                                                                                                                                                             |
|---------|----------------------------------------------------------------------------------------------------------------------------------------------------------------------------------------------------------------------------------------------------------------------------------------------------|--------------------------------------------------------------------|----------------------------------------|-------------------------------------------------------------------------------------------------------------------------------------------------------------------------------------------------------------------------------------------------------------------------------------------------------------------------------------------------------------------------------------------------------------------------------------------------------------------------------------------------------------------------------------------------------------------------------------------------------------------------------------------------------------------------------------------------------------------------------------------------------------------------------------------------------------------------------------------------------------------------------------------------------------------------------------------------------------|
| 10      | Rehabilitation professionals <u>should</u> understand the implications of <b>HIV disclosure</b> among older adults with HIV, be respectful of individualized choice surrounding disclosure and be prepared to discuss ways to ensure clients obtain the necessary supports surrounding disclosure. | 17 (89.5)                                                          | 8 (42.1)                               | <p>Strongly agree.</p> <p>I feel this statement is an excellent start but that 'implications of HIV Disclosure' should be further flushed out...even if just to indicate where the implications may lie (social, legal, etc).</p> <p>Everyone wants privacy, especially, surrounding disease or disability. I know many who have experienced a lack of understanding in regards to their status.</p> <p>The rehabilitation professional should be part of a team to address these issues - this implies it is done in isolation a working as.</p> <p>I'm not sure I understand ALL the implications around disclosure after being infected for 25 years.</p> <p>HIV criminal law is a significant issue that will continue to impact PHAs including aging PHAs, many of whom may still be sexually active. This will be an important topic for care givers to have basic knowledge, proper referrals and strong/clear policies and procedures in place.</p> |
| 11      | Rehabilitation professionals <u>should</u> be knowledgeable about the importance of <b>social relationships</b> and the need for <b>emotional and practical social support</b> to maximize physical, mental and psychological well-being for older adults with HIV.                                | 18 (94.7)                                                          | 10 (52.6)                              | <p>Social support plays a very important part in the success of any treatment/intervention plans with people living with HIV, especially those of older adults. Hence it is important to understand the impact (positive or negative) of the client's closest relationships as well as their social circle in general while assessing and planning their course of treatment.</p>                                                                                                                                                                                                                                                                                                                                                                                                                                                                                                                                                                           |
| 12      | Rehabilitation professionals <u>should</u> consider the role of <b>self-management strategies</b> to promote health and wellness among older adults living with HIV.                                                                                                                               | 18 (94.7)                                                          | 9 (47.4)                               | <p>The rehab recommendations may be used for several years. Self management to the best degree is vital.</p> <p>Self-management strategies such as learning to cope with pain, managing medications efficiently are some of the interventions that have worked very well with people living</p>                                                                                                                                                                                                                                                                                                                                                                                                                                                                                                                                                                                                                                                             |

| Number~ | Draft Recommendation                                                                                                                                                                                                                                                                                                                   | Number of PLHIV and Clinicians who Endorsed the Recommendation (%) | # (%) who looked at Evidence Citations | Selected Comments from Endorsement Participants                                                                                                                                                                                                                                                                                                                                                                                                                                                                                                                                                                                                                                                                                                                                                                                                                                                                                                                                                                 |
|---------|----------------------------------------------------------------------------------------------------------------------------------------------------------------------------------------------------------------------------------------------------------------------------------------------------------------------------------------|--------------------------------------------------------------------|----------------------------------------|-----------------------------------------------------------------------------------------------------------------------------------------------------------------------------------------------------------------------------------------------------------------------------------------------------------------------------------------------------------------------------------------------------------------------------------------------------------------------------------------------------------------------------------------------------------------------------------------------------------------------------------------------------------------------------------------------------------------------------------------------------------------------------------------------------------------------------------------------------------------------------------------------------------------------------------------------------------------------------------------------------------------|
|         |                                                                                                                                                                                                                                                                                                                                        |                                                                    |                                        | with HIV in my practice.                                                                                                                                                                                                                                                                                                                                                                                                                                                                                                                                                                                                                                                                                                                                                                                                                                                                                                                                                                                        |
|         |                                                                                                                                                                                                                                                                                                                                        |                                                                    |                                        | Is there a way to determine whether or not someone has Healthy coping strategies or not How would resilience be determined?                                                                                                                                                                                                                                                                                                                                                                                                                                                                                                                                                                                                                                                                                                                                                                                                                                                                                     |
| 13      | Rehabilitation professionals <u>may consider</u> the importance and role of <b>spirituality</b> in the health of older adults with HIV depending on the individual.                                                                                                                                                                    | 16 (84.2)                                                          | 7 (36.8)                               | <p>I see spirituality as including the expression of humanity and commonalities between health providers and PHAs.</p> <p>I am very pleased to see this area included and strongly support this recommendation. Quite often overlooked at any stage of HIV infection and other health-related issues.</p> <p>It was something I needed and had to search for. Not sure how important it is to the HIV community specifically.</p> <p>Very important in my experience.</p> <p>We have left Spirituality out of many conversations because it is too contentious, it needs to be reintroduced. The fruit of the Spirit is Love, Joy, Peace, Patience, Kindness Goodness, Faithfulness, Gentleness and Self-control. Quote from Rev. Brent Hawkes.</p> <p>I actually think professionals SHOULD consider this, however, it's very complicated and most professionals would not differentiate religion from spirituality which would often be quite negative so this recommendation makes sense in that regard.</p> |
| 14      | Rehabilitation professionals <u>should</u> use an <b>interprofessional approach to practice</b> that is sensitive to the unique and individualized <b>values and preferences</b> of older adults with HIV while considering issues of culture, stigma and discrimination. Specifically rehabilitation professionals should communicate | 18 (84.7)                                                          | 9 (47.4)                               | <p>Strongly endorse this recommendation.</p> <p>Holistic approaches seem to work best.</p> <p>Each individual in spite of disease or disability has similar needs.</p> <p>As rehab professionals, it is very important to adapt an</p>                                                                                                                                                                                                                                                                                                                                                                                                                                                                                                                                                                                                                                                                                                                                                                          |



| Number~ | Draft Recommendation                                                                                                                                                                                                                                                                                                                                                  | Number of PLHIV and Clinicians who Endorsed the Recommendation (%) | # (%) who looked at Evidence Citations | Selected Comments from Endorsement Participants                                                                                                                                                                                                                                                                             |
|---------|-----------------------------------------------------------------------------------------------------------------------------------------------------------------------------------------------------------------------------------------------------------------------------------------------------------------------------------------------------------------------|--------------------------------------------------------------------|----------------------------------------|-----------------------------------------------------------------------------------------------------------------------------------------------------------------------------------------------------------------------------------------------------------------------------------------------------------------------------|
|         | information surrounding care, treatment and education in a way is tailored to the specific needs of older adults with HIV to optimize physical and mental health and well-being.                                                                                                                                                                                      |                                                                    |                                        | inter-professional approach to provide client centered care. Clients may need better interpretation of impairments described to them by their doctors in terms of functional limitations, or strategies to overcome these limitations. Hence open dialogue is very necessary within the treatment team to better plan care. |
| 15      | Rehabilitation professionals <u>should</u> inquire about the nature and extent to which older adults with HIV use <b>complementary and alternative medicine (CAM)</b> and consider the potential benefits and side effects of CAM interventions.                                                                                                                      | 16 (84.2)                                                          | 9 (47.4)                               | For many PHAs these options are financially out of reach. Still would be good to know for the rehab provider.                                                                                                                                                                                                               |
| 16      | <b>Exercise (specifically progressive resistive exercise)</b> <u>may be recommended</u> for associated improvements in strength, body composition, and physical fitness in older adults living with HIV. Specifically, resistive exercise may be considered for use among older adults who are frail or debilitated to increase muscle strength and mitigate wasting. | 15 (78.9)                                                          | 8 (42.1)                               | I do this kind of work every day with seniors and with people living with dementia. I am a believer, but find few want to pay to get good fitness provided in this area.<br><br>For older patients I think you have to tailor the degree or exercise to the degree of frailty.<br><br>Probably works for everyone.          |
| 17      | <b>Aerobic and resistive exercise</b> <u>may be recommended</u> for at least 20 minutes at least 3 times per week for at least 5 weeks for older adults living with HIV who are medically stable with the potential to maintain or enhance outcomes of cardiopulmonary fitness, weight and body composition, strength, and quality of life.                           | 16 (84.2)                                                          | 9 (47.4)                               | Are there no studies using the benefits of Yoga or Tai Chi for older populations it would seem to be a more holistic with its combination of strength, balance, agility, and mental focus.                                                                                                                                  |
| 18      | Regular forms of <b>exercise</b> including (strength/resistance training, aerobic/cardiovascular endurance training, and balance/stability training) may be <b>strongly recommended</b> for older adults with HIV who are medically stable to reduce fall rates, improve functional and physical performance, improve                                                 | 16 (84.2)                                                          | 8 (42.1)                               | Poverty among PHAs means that home-based exercise may be the only viable option.<br><br>I don't like home based there is no added value like interpersonal contact and association Group energy can be synergistic.                                                                                                         |

| Number~ | Draft Recommendation                                                                                                                                                                                                                                                                                                                                                                                                                              | Number of PLHIV and Clinicians who Endorsed the Recommendation (%) | # (%) who looked at Evidence Citations | Selected Comments from Endorsement Participants                                                                                                                                                                                                                                                                                                                                                                                                                      |
|---------|---------------------------------------------------------------------------------------------------------------------------------------------------------------------------------------------------------------------------------------------------------------------------------------------------------------------------------------------------------------------------------------------------------------------------------------------------|--------------------------------------------------------------------|----------------------------------------|----------------------------------------------------------------------------------------------------------------------------------------------------------------------------------------------------------------------------------------------------------------------------------------------------------------------------------------------------------------------------------------------------------------------------------------------------------------------|
|         | cardiopulmonary fitness, reduce depressive symptoms, and improve mood and quality of life.                                                                                                                                                                                                                                                                                                                                                        |                                                                    |                                        |                                                                                                                                                                                                                                                                                                                                                                                                                                                                      |
| 19      | <b>Multidisciplinary forms of rehabilitation</b> is strongly recommended for older adults with HIV who are hospitalized to promote earlier discharge directly home from hospital and reduced costs associated with hospitalization.                                                                                                                                                                                                               | 18 (94.7)                                                          | 8 (42.1)                               | I more strongly endorse follow up with a similar course of action to avoid re-hospitalization.<br><br>PT/OT/SW trifecta works well in emergency environments and others.<br><br>This is critical.                                                                                                                                                                                                                                                                    |
| 20      | <b>Occupational therapy</b> may be an important component of rehabilitation for older adults living with HIV with functional impairments and is strongly recommended for elderly community dwellers, specifically for advising on adaptive devices; mobility devices; energy conservation; cognitive training; training of skills to use adaptive devices to enhance functional ability, and to enhance social participation and quality of life. | 18 (94.7)                                                          | 8 (42.1)                               | In my practice with people living with HIV, I have found an indispensable role for OT in terms of areas described above such as adaptive devices, mobility devices, energy conservation and cognitive strategies. OT was well received.<br><br>Is training on using social media part of this?? i.e. computer training and the use of things like learning about facebook or even how to set up your own blog or how to find web sites and information in searches?? |
| 21      | <b>Supervised exercise sessions</b> <u>should be recommended</u> to older adults living with HIV with knee and/or hip osteoarthritis (OA) who are medically stable to improve pain and physical function. A combination of low impact exercise in the form of jogging, stair climbing and walking, combining with high-magnitude resistance training should be recommended for older adults with HIV to preserve bone mineral density.            | 14 (73.7)                                                          | 6 (31.6)                               | Need to recognize the feasibility of implementing these types of supervised programs accepting the other social issues in HIV.<br><br>Although I don't agree that these should be the only options explored again Yoga and tai chi also provide good results maybe just not researched well.<br><br>I endorse based on this process and evidence but have no personal or direct professional opinion.                                                                |
| 22      | <b>Balance and strengthening exercises</b> <u>should</u> be part of an overall exercise program to decrease falls and risk of fall-related fractures for older adults with HIV and low bone mineral density (BMD).                                                                                                                                                                                                                                | 17 (89.5)                                                          | 7 (36.8)                               | No comments                                                                                                                                                                                                                                                                                                                                                                                                                                                          |

| Number~ | Draft Recommendation                                                                                                                                                                                                                                                                                                                                                                                                                                                                                                                              | Number of PLHIV and Clinicians who Endorsed the Recommendation (%) | # (%) who looked at Evidence Citations | Selected Comments from Endorsement Participants                                                                                                                                                                                                                                                                                                                                                                                            |
|---------|---------------------------------------------------------------------------------------------------------------------------------------------------------------------------------------------------------------------------------------------------------------------------------------------------------------------------------------------------------------------------------------------------------------------------------------------------------------------------------------------------------------------------------------------------|--------------------------------------------------------------------|----------------------------------------|--------------------------------------------------------------------------------------------------------------------------------------------------------------------------------------------------------------------------------------------------------------------------------------------------------------------------------------------------------------------------------------------------------------------------------------------|
| 23      | <b>Multidisciplinary rehabilitation teams</b> comprised of OT and PT across the continuum of care should be recommended for older adults with HIV who sustain a hip fracture. Specifically, inpatient geriatric rehabilitation programs are strongly recommended and may be an ideal intervention as they have the potential to reduce nursing home admission, mortality and improve functional status.                                                                                                                                           | 16 (84.2)                                                          | 6 (31.6)                               | <p>If a high frequency program was available as an outpatient could this possibly be as good as inpatient?</p> <p>My experience with the elderly in long-term care homes showed me that rehab programming for the elderly was minimal. As time passed person after person lost mobility leading eventually to life in a wheel chair.</p> <p>So spend some time on determining which interventions and outcomes would be most suitable.</p> |
| 24      | <b>Self-management programs</b> may be considered as a component of a rehabilitation program to address disability and pain for older adults living with HIV and arthritis.                                                                                                                                                                                                                                                                                                                                                                       | 15 (78.9)                                                          | 7 (36.8)                               | <p>How well would these work in HIV with other issues?</p> <p>It would depend on the person's ability of self-discipline.</p>                                                                                                                                                                                                                                                                                                              |
| 25      | A combination of <b>aerobic and resistance</b> exercise at moderate intensity <u>may be recommended</u> for older adults living with HIV and cancer to reduce cancer-related fatigue during and after treatment for cancer. Any exercise intervention should be individualized based on the targeted health outcome and cancer type.                                                                                                                                                                                                              | 14 (73.7)                                                          | 8 (42.1)                               | <p>Too often we look at our limitations NOT what we can still do or how we just do it differently.</p> <p>I endorse based on this process and evidence but have no personal or direct professional opinion.</p>                                                                                                                                                                                                                            |
| 26      | A combination of <b>aerobic and resistive exercise</b> at least twice a week for at least 2 weeks at 50-90% VO2max intensity is safe and <u>may be recommended</u> for older adults living with cancer for improvements in physiological measures, symptoms, physical and psychosocial functioning of patients and health-related QOL. Positive effects of exercise may vary significantly as a function of the type of cancer; the stage of disease; the medical treatment; the nature, intensity, and duration of the exercise program; and the | 13 (68.4)                                                          | 6 (31.6)                               | <p>I endorse based on this process and evidence but have no personal or direct professional opinion.</p>                                                                                                                                                                                                                                                                                                                                   |

| Number~ | Draft Recommendation                                                                                                                                                                                                                                                                                                                                                                                                                                                                                                                                                                                                                                                                                                            | Number of PLHIV and Clinicians who Endorsed the Recommendation (%) | # (%) who looked at Evidence Citations | Selected Comments from Endorsement Participants                                                                                                                                                                                 |
|---------|---------------------------------------------------------------------------------------------------------------------------------------------------------------------------------------------------------------------------------------------------------------------------------------------------------------------------------------------------------------------------------------------------------------------------------------------------------------------------------------------------------------------------------------------------------------------------------------------------------------------------------------------------------------------------------------------------------------------------------|--------------------------------------------------------------------|----------------------------------------|---------------------------------------------------------------------------------------------------------------------------------------------------------------------------------------------------------------------------------|
|         | lifestyle of the patient.                                                                                                                                                                                                                                                                                                                                                                                                                                                                                                                                                                                                                                                                                                       |                                                                    |                                        |                                                                                                                                                                                                                                 |
| 27      | <b>Exercise</b> may be beneficial for self-empowerment and <u>should</u> be recommended for older adults living with HIV who are also living with lung cancer who are medically stable.                                                                                                                                                                                                                                                                                                                                                                                                                                                                                                                                         | 14 (73.7)                                                          | 7 (36.8)                               | I endorse based on this process and evidence but have no personal or direct professional opinion.                                                                                                                               |
| 28      | <b>Supervised aerobic exercise programmes</b> should be included during breast cancer treatment for the management of cancer related fatigue for older women living with HIV and breast cancer who are medically stable. A combination of aerobic and resistive exercise at least 3 times per week for at least 6 weeks, 30-40 minutes per session, at moderate intensity (e.g. rate of perceived exertion 11-13 out of 20) appears to be safe and may be recommended for older women living with HIV undergoing or who have undergone treatment for breast cancer and who are medically stable for potential improvements in cardiopulmonary fitness, physical functioning, fatigue, and body composition and quality of life. | 14 (73.7)                                                          | 7 (36.8)                               | although all these may be needed to be presented as a longitudinal lifestyle change not just short term interventions.<br><br>I endorse based on this process and evidence but have no personal or direct professional opinion. |
| 29      | A combination of <b>aerobic and resistive exercise</b> <u>may be recommended</u> for older adults living with HIV and metastatic cancer (either HIV-related or not) who are medically stable for improvements in quality of life and physical health status.                                                                                                                                                                                                                                                                                                                                                                                                                                                                    | 10 (52.6)<br><i>[deleted from the final recommendations]</i>       | 8 (42.1)                               | Not all HEALING requires a CURE. Acceptance doesn't preclude fighting.<br><br>I endorse based on this process and evidence but have no personal or direct professional opinion.                                                 |
| 30      | Inconclusive or insufficient evidence exists to derive recommendations for <b>cognitive rehabilitation</b> interventions for older adults with HIV and stroke. While cognitive rehabilitation does not appear                                                                                                                                                                                                                                                                                                                                                                                                                                                                                                                   | 19 (100)                                                           | 6 (31.6)                               | There needs to be age targets for baseline determinants.<br><br>Key to determine baseline and monitor for non-stroke related cognitive issues and required support/care.                                                        |

| Number~ | Draft Recommendation                                                                                                                                                                                                                                                                                                                                                                                                                                                                                                                                                                                                                               | Number of PLHIV and Clinicians who Endorsed the Recommendation (%) | # (%) who looked at Evidence Citations | Selected Comments from Endorsement Participants                                                                                                                                                                                                                                                                                                           |
|---------|----------------------------------------------------------------------------------------------------------------------------------------------------------------------------------------------------------------------------------------------------------------------------------------------------------------------------------------------------------------------------------------------------------------------------------------------------------------------------------------------------------------------------------------------------------------------------------------------------------------------------------------------------|--------------------------------------------------------------------|----------------------------------------|-----------------------------------------------------------------------------------------------------------------------------------------------------------------------------------------------------------------------------------------------------------------------------------------------------------------------------------------------------------|
|         | harmful, weak evidence exists to support the use of cognitive-specific interventions to improve spatial neglect, disability, memory, and functional status for older adults who experience stroke. Rehabilitation professionals should implement specific task oriented training with older adults living with HIV and stroke as this approach is key to retraining skill specific tasks related to function.                                                                                                                                                                                                                                      |                                                                    |                                        |                                                                                                                                                                                                                                                                                                                                                           |
| 31      | <b>Stroke rehabilitation</b> for older adults with HIV <u>should</u> multi-disciplinary including occupational therapy, physical therapy, and speech-language pathology to improve the ability to undertake personal activities of daily living and reduce risk of deterioration in ability. Stroke rehabilitation may include the following components: therapeutic exercise, task-oriented training, gait-oriented training, balance training, strength training, wheelchair mobility, home modification, cognitive adaptation, and treatment of shoulder subluxation for those who experience a sub-acute or post-acute stroke (within 1 year). | 19 (100)                                                           | 7 (36.8)                               | No comments                                                                                                                                                                                                                                                                                                                                               |
| 32      | There exists inconclusive or insufficient evidence on the effectiveness of <b>long-term rehabilitation interventions</b> on patient or carer outcomes 1 year post stroke are to provide a recommendation for older adults with HIV and stroke.                                                                                                                                                                                                                                                                                                                                                                                                     | *9 (47.4)<br><i>[deleted from final recommendations]</i>           | 8 (42.1)                               | I do not understand this recommendation.<br><br>I'm unclear as to what is recommended here - further action or no action after a year.<br><br>I see improvements in post=stroke patients days, weeks, months and years after their strokes.<br><br>I found the wording of that recommendation confusing - I am not sure what the exact recommendation is. |

| Number~ | Draft Recommendation                                                                                                                                                                                                                                                                                                                                                                                                                                                                                                                                                                                     | Number of PLHIV and Clinicians who Endorsed the Recommendation (%) | # (%) who looked at Evidence Citations | Selected Comments from Endorsement Participants                                                   |
|---------|----------------------------------------------------------------------------------------------------------------------------------------------------------------------------------------------------------------------------------------------------------------------------------------------------------------------------------------------------------------------------------------------------------------------------------------------------------------------------------------------------------------------------------------------------------------------------------------------------------|--------------------------------------------------------------------|----------------------------------------|---------------------------------------------------------------------------------------------------|
| 33      | <b>Occupational therapy</b> <u>should</u> be recommended as a component of rehabilitation for older adults living with HIV with stroke as interventions targeted towards personal activities of daily living may increase ADLs and reduced death, deterioration and dependency.                                                                                                                                                                                                                                                                                                                          | 17 (89.5)                                                          | 7 (36.8)                               | No Comments                                                                                       |
| 34      | <b>Physiotherapy</b> comprised of a combination of interventions <u>should</u> be recommended for the recovery of postural control and lower limb function for older adults living with HIV following stroke.                                                                                                                                                                                                                                                                                                                                                                                            | 17 (89.5)                                                          | 5 (26.3)                               | I endorse based on this process and evidence but have no personal or direct professional opinion. |
| 35      | <b>Electromechanical-assisted gait training</b> in combination with physiotherapy <u>may be recommended</u> for older adults living with HIV with stroke (particularly those within 3 months post stroke) as this intervention is associated with a higher likelihood to achieve independent walking than gait training alone.                                                                                                                                                                                                                                                                           | 12 (63.2)                                                          | 5 (26.3)                               | I endorse based on this process and evidence but have no personal or direct professional opinion. |
| 36      | <b>Combined aerobic and resistive exercise</b> <u>should</u> be a component of stroke rehabilitation for older adults living with HIV with stroke who are medically stable at any stage of motor recovery. Higher doses of exercise may be associated with better motor recovery. Specifically, cardiorespiratory training should be a component of exercise as evidence suggests speed, tolerance and independence during walking are improved. Specifically, strength training may be a component as this can improve muscle strength in stroke patients and will not necessarily increase spasticity. | 15 (78.9)                                                          | 4 (21.1)                               | No Comments                                                                                       |

| Number~ | Draft Recommendation                                                                                                                                                                                                                                                                                                                                                                                                                                                                                                                                     | Number of PLHIV and Clinicians who Endorsed the Recommendation (%) | # (%) who looked at Evidence Citations | Selected Comments from Endorsement Participants                                                |
|---------|----------------------------------------------------------------------------------------------------------------------------------------------------------------------------------------------------------------------------------------------------------------------------------------------------------------------------------------------------------------------------------------------------------------------------------------------------------------------------------------------------------------------------------------------------------|--------------------------------------------------------------------|----------------------------------------|------------------------------------------------------------------------------------------------|
| 37      | <p><b>Electrotherapeutic modalities</b> <u>alone are not recommended</u> for older adults living with HIV with stroke over conventional rehabilitation interventions strategies. There exists very weak to no evidence to support the use of electrotherapeutic modalities (functional electrical stimulation, biofeedback, visual feedback therapy) over conventional PT interventions along for muscle strength recovery, upper limb recovery or balance post stroke.</p>                                                                              | 10 (52.6)                                                          | 4 (21.1)                               | No Comments                                                                                    |
| 38      | <p><b>Cardiac rehabilitation</b> in the form of home-based or centre-based care <u>may be recommended</u> because these appear equally effective in improving the clinical &amp; health related quality of life outcomes for older adults with HIV with low risk cardiovascular disease. The choice of home versus centre-based care should be reflective of the individual preference of the patient as this may impact the uptake of rehabilitation.</p>                                                                                               | 15 (78.9)                                                          | 6 (31.6)                               | Strongly support this recommendation.                                                          |
| 39      | <p><b>Cardiac rehabilitation</b> for older adults with HIV should include reinforcement, feedback, offer opportunity for individualization, facilitate behaviour change through skills and resources and be relevant to patients needs and abilities. Specifically, motivational communication such as formal cardiac rehabilitation program referral, reminder letters, phone calls and home visits may be recommended for increasing uptake and adherence of cardiac rehabilitation among older adults living with HIV and cardiovascular disease.</p> | 16 (84.2)                                                          | 5 (26.3)                               | Would this include an ability to determine emotional state depression would affect motivation? |



| Number~ | Draft Recommendation                                                                                                                                                                                                                                                                                                                                                                                                                                                                                                                                                                                                                                                                                                                                                                                            | Number of PLHIV and Clinicians who Endorsed the Recommendation (%) | # (%) who looked at Evidence Citations | Selected Comments from Endorsement Participants                                                 |
|---------|-----------------------------------------------------------------------------------------------------------------------------------------------------------------------------------------------------------------------------------------------------------------------------------------------------------------------------------------------------------------------------------------------------------------------------------------------------------------------------------------------------------------------------------------------------------------------------------------------------------------------------------------------------------------------------------------------------------------------------------------------------------------------------------------------------------------|--------------------------------------------------------------------|----------------------------------------|-------------------------------------------------------------------------------------------------|
| 40      | <p><b>Exercise-based cardiac rehabilitation should be recommended</b> for older adults with HIV who have undergone a myocardial infarction (MI) (otherwise known as a heart attack) (or at risk of an MI) given evidence suggests exercise based cardiac rehabilitation is effective in reducing cardiac deaths. The ideal frequency, intensity, time and type of exercise to maximize benefits are unclear. Early mobilization and rehabilitation and specifically, secondary and tertiary prevention programs (including counseling, education, and exercise) should be recommended to older adults living with HIV who experience an MI as these have the potential to reduce subsequent MI and mortality and improve processes of care, risk factor profiles and functional status and quality of life.</p> | *14 (73.7)                                                         | 4 (21.1)                               | Endorse based on this process and evidence but have no personal or direct professional opinion. |
| 41      | <p><b>Moderate intensity exercise</b> (and potentially progressive resistive exercise) should be recommended for older adults with HIV with cardiovascular disease who are medically stable to reduce high blood pressure and potentially mitigate the effect of coronary heart disease. Exercise may be associated with improved cardiovascular health and well-being as a result of enhanced self-efficacy. More research is required to determine the ideal frequency and duration of exercise that should be recommended to see psychological improvement. High intensity aerobic exercise may increase HDL-C levels, while combined aerobic and resistance exercise may lower LDL-C levels</p>                                                                                                             | 16 (84.2)                                                          | 5 (26.3)                               | Again I refer to yoga.                                                                          |

| Number~ | Draft Recommendation                                                                                                                                                                                                                                                                                                                                                                                                                                                                                                                                                                               | Number of PLHIV and Clinicians who Endorsed the Recommendation (%) | # (%) who looked at Evidence Citations | Selected Comments from Endorsement Participants                                                                                                                                                                                                                                                                                                       |
|---------|----------------------------------------------------------------------------------------------------------------------------------------------------------------------------------------------------------------------------------------------------------------------------------------------------------------------------------------------------------------------------------------------------------------------------------------------------------------------------------------------------------------------------------------------------------------------------------------------------|--------------------------------------------------------------------|----------------------------------------|-------------------------------------------------------------------------------------------------------------------------------------------------------------------------------------------------------------------------------------------------------------------------------------------------------------------------------------------------------|
|         | and should be recommended for older adults with HIV to improve their cardiovascular health.                                                                                                                                                                                                                                                                                                                                                                                                                                                                                                        |                                                                    |                                        |                                                                                                                                                                                                                                                                                                                                                       |
| 42      | <b>Home-based moderate intensity exercise</b> (and potentially progressive resistive exercise) as well as <b>supervised and hospital-based exercise programs</b> appear to be safe and <u>should be recommended</u> for older adults with HIV and heart failure who are medically stable for potential improvements in cardiac function, exercise capacity (including peak oxygen consumption), physical function, mortality and quality of life and potentially a reduction in hospital admissions. Optimal session frequency, session duration, exercise intensity, program duration is unclear. | *14 (73.7)                                                         | 4 (21.1)                               | I think that what is not addressed for many of these recommendations is lack of funding for them at home or in day care settings.<br><br>Programs need not be hospital based.... development of community partner links would probably be more cost effective and affordable for all parties senior programs may need better development and funding. |
| 43      | <b>Aerobic exercise</b> (and possibly resistive exercise) at least 3 times per week may be recommended to older adults living with HIV and hyperlipidemia for the potential to improve blood lipids. Clinical importance of the changes are questionable.                                                                                                                                                                                                                                                                                                                                          | *14 (73.7)                                                         | 3 (15.8)                               | Recommending fitness is not enough. There should be programs to help the client succeed with the fitness recommendations.<br><br>I endorse based on this process and evidence but have no personal or direct professional opinion.                                                                                                                    |
| 44      | Inconclusive or insufficient evidence exists to support a recommendation for a specific model of mental health care (acute psychogeriatric care over acute psychiatric units versus other mental health services) for older adults with HIV living with mental health issues. More research is needed before recommending one model of care over another.                                                                                                                                                                                                                                          | 17 (89.5)                                                          | 6 (31.6)                               | Do we have the resources to be able to ask care units to engage in this kind of placement strategy or patient tracking?                                                                                                                                                                                                                               |
| 45      | <b>Exercise</b> appears safe and <u>should be recommended</u> (approximately 30 minutes per session) to older adults with HIV living                                                                                                                                                                                                                                                                                                                                                                                                                                                               | 16 (84.2)                                                          | 6 (31.6)                               | Not sure about the second part "to mitigate anxiety" in this population of HIV positive.                                                                                                                                                                                                                                                              |

| Number~ | Draft Recommendation                                                                                                                                                                                                                                                                  | Number of PLHIV and Clinicians who Endorsed the Recommendation (%) | # (%) who looked at Evidence Citations | Selected Comments from Endorsement Participants                                                                                                                                                                                                                                                                                                                                                                                                                                                                                                                                                                                                                                                                                                                                                                                                                                                                        |
|---------|---------------------------------------------------------------------------------------------------------------------------------------------------------------------------------------------------------------------------------------------------------------------------------------|--------------------------------------------------------------------|----------------------------------------|------------------------------------------------------------------------------------------------------------------------------------------------------------------------------------------------------------------------------------------------------------------------------------------------------------------------------------------------------------------------------------------------------------------------------------------------------------------------------------------------------------------------------------------------------------------------------------------------------------------------------------------------------------------------------------------------------------------------------------------------------------------------------------------------------------------------------------------------------------------------------------------------------------------------|
|         | with other chronic conditions illnesses such as CVD, cancer, chronic pain, fibromyalgia as a way to mitigate symptoms of anxiety.                                                                                                                                                     |                                                                    |                                        | There is an old exercise regime for the cure or relief of fibromyalgia I'm not convinced that my pain level isn't a function of time accumulation without relief of pain my pain isn't treated and so my pain just keeps being reinforced AND added to daily.                                                                                                                                                                                                                                                                                                                                                                                                                                                                                                                                                                                                                                                          |
| 46      | Inconclusive or insufficient evidence exists to support the use of <b>cognitive behavioural therapy</b> with older adults with HIV and depression.                                                                                                                                    | 14 (73.7)                                                          | 9 (47.4)                               | <p>Is there any information on Mindfulness Based Approach?</p> <p>I'm unclear as to what is recommended - action or no action.</p> <p>Regardless of intervention, metastudies show that it is the nature of the therapeutic relationship that makes the difference, therefore, clinicians should be able to work in a multitude of cognitive, behavioural, and emotion-focused modes of treatment.</p> <p>It would have to be individually based as to whether someone would benefit from cognitive behavioral therapy (CBT) - and not diagnosis/population based.</p> <p>This has worked for me I have many learned tools in my kit some I use daily.</p> <p>You should however mention that there is strong evidence for CBT (at least I thought there was) for CBT in younger adults with HIV.</p> <p>Anecdotally, CBT and other mental health interventions are important resources and options for good care.</p> |
| 47      | Supporting older adults living with HIV in securing <b>safe and stable housing</b> <u>should</u> be an important component of the rehabilitation process for older adults with HIV with severe mental illness given the positive impact of stable housing for this target population. | 18 (94.7)                                                          | 6 (31.6)                               | <p>Highly important, given the high levels of poverty among PHAs.</p> <p>Yes, in many cases housing first strategies are successful in mitigating mental health issues.</p> <p>Safe and secure housing should be a right for ALL people please refer to Positive spaces, Healthy spaces study.</p>                                                                                                                                                                                                                                                                                                                                                                                                                                                                                                                                                                                                                     |

| Number~ | Draft Recommendation                                                                                                                                                                                                                                                                                                                                                                                                                                                                                                                                                                                                                                                                                                                                                                                                                   | Number of PLHIV and Clinicians who Endorsed the Recommendation (%) | # (%) who looked at Evidence Citations | Selected Comments from Endorsement Participants                                                                                   |
|---------|----------------------------------------------------------------------------------------------------------------------------------------------------------------------------------------------------------------------------------------------------------------------------------------------------------------------------------------------------------------------------------------------------------------------------------------------------------------------------------------------------------------------------------------------------------------------------------------------------------------------------------------------------------------------------------------------------------------------------------------------------------------------------------------------------------------------------------------|--------------------------------------------------------------------|----------------------------------------|-----------------------------------------------------------------------------------------------------------------------------------|
| 48      | <p><b>Cognitive interventions</b> including cognitive training, cognitive stimulation, and cognitive rehabilitation <u>should</u> be recommended for older adults living with HIV with mild cognitive impairment because they are associated with significant improvements objective and subjective measures of memory, quality of life and mood / anxiety with benefits translated to improvements in daily functioning and mood. Specifically, errorless learning may be recommended for a potential positive effect on recall for older adults with HIV and cognitive impairment.</p>                                                                                                                                                                                                                                               | 17 (89.5)                                                          | 7 (36.8)                               | It is unclear whether this applies to HIV associated dementia Probably wouldn't hurt but may be expensive and resource intensive. |
| 49      | <p>A combination of <b>aerobic and resistive (strengthening) exercise</b> <u>should be recommended</u> for older adults living with HIV with cognitive impairment for improvements in fitness, physical function, cognitive function, and positive behavior. Evidence suggests older adults with cognitive impairment may benefit from exercise as much as older adults with no cognitive impairment. Due to diversity in exercise programs, measures of cognition, and study populations in the evidence, the optional type of exercise program (content, intensity, frequency, and duration) is unclear. Specifically, aerobic exercise may be associated with improvements in neurocognitive function among older adults with HIV with cognitive impairment for attention and processing speed, executive function, and memory.</p> | 18 (94.7)                                                          | 7 (36.8)                               | Again yoga utilizes mental focus for exercises.                                                                                   |

| Number~ | Draft Recommendation                                                                                                                                                                                                                                                                                                                                                                                                                                                                                                    | Number of PLHIV and Clinicians who Endorsed the Recommendation (%) | # (%) who looked at Evidence Citations | Selected Comments from Endorsement Participants                                                                                                                                                                                                                                   |
|---------|-------------------------------------------------------------------------------------------------------------------------------------------------------------------------------------------------------------------------------------------------------------------------------------------------------------------------------------------------------------------------------------------------------------------------------------------------------------------------------------------------------------------------|--------------------------------------------------------------------|----------------------------------------|-----------------------------------------------------------------------------------------------------------------------------------------------------------------------------------------------------------------------------------------------------------------------------------|
| 50      | Physical exercise appears to be safe and may be recommended for older adults living with HIV and dementia however insufficient evidence exists to suggest benefits to cognition, function, behaviour, depression, and mortality.                                                                                                                                                                                                                                                                                        | 15 (78.9)                                                          | 6 (31.6)                               | I lead a dementia friendly class twice a week. The results are great and the group shows up consistently and we have fun.                                                                                                                                                         |
| 51      | <b>Pulmonary rehabilitation</b> (including upper and lower extremity exercise, inspiratory muscle training and breathing exercises) for at least four weeks is <u>safe and strongly recommended</u> for older adults living with HIV who have COPD to reduce mortality, improve dyspnea, health-related quality of life, functional exercise capacity and reduce future hospital admissions. Individuals with more severe COPD may require longer rehabilitation programs of at least 6 months to demonstrate benefits. | 14 (73.7)                                                          | 5 (26.3)                               | Important, given high levels of smoking at some point in lifetime among PHAs.<br><br>This needs to be rolled out as a lifestyle change not just short term intervention.<br><br>I endorse based on this process and evidence but have no personal or direct professional opinion. |
| 52      | <b>Aerobic and progressive resistance exercise</b> at least two times per week for at least 8 weeks appears feasible, safe and may be recommended for older adults with HIV with mild to moderate COPD for improvements in exercise capacity and muscle strength that may translate into improved activity performance and societal participation. Careful consideration is required when prescribing progressive resistance exercise programs for people with COPD who have comorbid health conditions.                | 13 (68.4)                                                          | 4 (21.1)                               | I endorse based on this process and evidence but have no personal or direct professional opinion.                                                                                                                                                                                 |
| 53      | <b>Inspiratory muscle training (IMT)</b> in the form of targeted, threshold or normocapneic hyperventilation is an important component of pulmonary rehabilitation and is <u>strongly</u>                                                                                                                                                                                                                                                                                                                               | 12 (63.2)                                                          | 5 (26.3)                               | I endorse based on this process and evidence but have no personal or direct professional opinion.                                                                                                                                                                                 |

| Number~ | Draft Recommendation                                                                                                                                                                                                                                                                                                                                                                                                                                                              | Number of PLHIV and Clinicians who Endorsed the Recommendation (%) | # (%) who looked at Evidence Citations | Selected Comments from Endorsement Participants                                                                                                                              |
|---------|-----------------------------------------------------------------------------------------------------------------------------------------------------------------------------------------------------------------------------------------------------------------------------------------------------------------------------------------------------------------------------------------------------------------------------------------------------------------------------------|--------------------------------------------------------------------|----------------------------------------|------------------------------------------------------------------------------------------------------------------------------------------------------------------------------|
|         | <p>recommended for older adults living with HIV with COPD to improve inspiratory muscle strength and endurance, dyspnea, exercise capacity and quality of life. Optimal frequency, intensity, supervision and duration of IMT is unclear.</p>                                                                                                                                                                                                                                     |                                                                    |                                        |                                                                                                                                                                              |
| 54      | <p><b>Aerobic resistive exercise</b> for at least 8 weeks is strongly recommended for older adults living with HIV with diabetes (type 2) to improve cardiopulmonary fitness and ensure glucose control. Optimal frequency, intensity, time and type of exercise are unclear however evidence suggests increased exercise prescription, fitness testing, supervision and group sessions at a greater number of times per week may be associated with greater health benefits.</p> | 17 (89.5)                                                          | (21.1)                                 | <p>What happens after 8 weeks - it doesn't work or they should stop.</p> <p>Important since diabetes is increasingly seen in PHAs as a result of treatment side effects.</p> |

1  
2  
3  
4  
5  
6  
7  
8  
9  
10  
11  
12  
13  
14  
15  
16  
17  
18  
19  
20  
21  
22  
23  
24  
25  
26  
27  
28  
29  
30  
31  
32  
33  
34  
35  
36  
37  
38  
39  
40  
41  
42  
43  
44  
45  
46  
47  
48  
49  
50  
51  
52  
53  
54  
55  
56  
57  
58  
59  
60

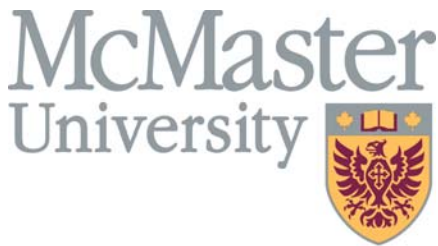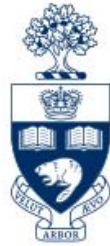

UNIVERSITY OF  
**TORONTO**

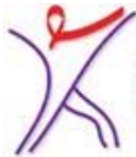

Canadian Working Group on HIV and Rehabilitation  
Groupe de travail canadien sur le VIH et la réinsertion sociale

# Evidence-Informed Recommendations in Rehabilitation for Older Adults Living HIV

April 2014

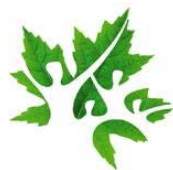

**CIHR IRSC**  
Canadian Institutes of Health Research | Instituts de recherche en santé du Canada



## Evidence-Informed Recommendations in Rehabilitation for Older Adults Living with HIV

## Evidence-Informed Recommendations Team

Patricia Solomon, McMaster University

Kelly K. O'Brien, University of Toronto

Joy MacDermid, McMaster University

Barry Trentham, University of Toronto

Larry Baxter, Canadian Working Group on HIV and Rehabilitation (CWGHR)

Alan Casey, University of Manitoba

William Chegwiddden, Barts and the London NHS Trust

Duncan MacLachlan, AIDS Committee of Toronto, Universities Without Walls, OHTN

Greg Robinson, Canadian Working Group on HIV and Rehabilitation (CWGHR)

Todd Tran, Community Care Access Centre, Toronto

Anne-Marie Tynan, St. Michael's Hospital, Toronto, Ontario

Janet Wu, St. Michael's Hospital, Toronto, Ontario

Elisse Zack, Canadian Working Group on HIV and Rehabilitation (CWGHR)

## Acknowledgements

This research was funded by a Canadian Institutes of Health Research (CIHR) Knowledge Synthesis grant (Fund # 108046). Kelly O'Brien was funded by a Fellowship from the CIHR and a Michael DeGroot Postdoctoral Fellowship (McMaster University).

We gratefully acknowledge Elizabeth Uleryk (Hospital for Sick Children) for her role in the search strategy; Ken King (Canadian Working Group on HIV and Rehabilitation) and Sheila Thomas (St. Michael's Hospital) for their role as knowledge users in earlier phases of this work; Jenn Jimmo for her role in data extraction, Nicole Gervais for her involvement in the implementation of the endorsement survey, and Nkem Iku for her involvement in the literature review, endorsement survey summary, and Additional File 2. We also thank David Vance and Debra Henninger, authors of included evidence who graciously provided additional information for this synthesis.

We acknowledge the following individuals for their involvement in the endorsement phase of the recommendations development: Colleen Price, Glyn Townson (Canadian Working Group on HIV and Rehabilitation), Rob Alexander (HIVER Consulting), Charles Furlotte (Hamilton Health Sciences Centre, McMaster University), Dawn James (Nine Circles Community Health Centre), Francisco Ibáñez-Carrasco (Ontario HIV Treatment Network), Gordon Arbess (St. Michael's Hospital), Bani Ahuja (Occupational Therapist), Michael Hamilton, Evan Collins (Department of Psychiatry, University of Toronto), and Murray Jose (Toronto People With AIDS Foundation).

### Citation

These recommendations should be cited as the following: O'Brien KK, Solomon P, Trentham B, MacLachlan D, MacDermid J, Tynan AM, Baxter L, Casey A, Chegwiddden W, Robinson G, Tran T, Wu J, Zack E. *Evidence-informed recommendations in rehabilitation for older adults living with HIV*. 2014.

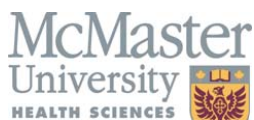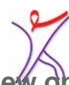

Canadian Working Group on HIV and Rehabilitation  
Groupe de travail canadien sur le VIH et la réinsertion sociale

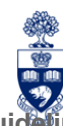

UNIVERSITY OF  
TORONTO

For peer review only - <http://bmjopen.bmj.com/site/about/guidelines.xhtml>

## Table of Contents

|                                                                                                                |       |
|----------------------------------------------------------------------------------------------------------------|-------|
| Executive Summary                                                                                              | 4-5   |
| Overarching Summary Recommendations                                                                            | 6-7   |
| Specific Recommendations on Rehabilitation for Older Adults Living with HIV                                    | 8-53  |
| Stream A - Recommendations Derived from Evidence Specific to Rehabilitation, HIV and Aging                     | 9-18  |
| A) Preparedness of Rehabilitation Professionals                                                                | 9     |
| B) Approaches to rehabilitation                                                                                | 10-13 |
| C) Extrinsic Factors to consider                                                                               | 14-15 |
| D) Intrinsic Factors to consider                                                                               | 16    |
| E) Rehabilitation Approaches                                                                                   | 17    |
| F) Rehabilitation Interventions                                                                                | 18    |
| Stream B - Recommendations for Rehabilitation Interventions Derived from High Level Evidence in Specific Areas | 19-56 |
| A) Older Adults Living with HIV                                                                                | 21-24 |
| B) HIV/AIDS                                                                                                    | 25    |
| C) Bone and Joint Disorders                                                                                    | 26-29 |
| D) Cancer                                                                                                      | 30-33 |
| E) Stroke                                                                                                      | 34-40 |
| F) Cardiovascular Disease (CVD)                                                                                | 41-46 |
| G) Mental Health Challenges                                                                                    | 47-49 |
| H) Cognitive Impairments                                                                                       | 50-52 |
| I) Chronic Obstructive Pulmonary Disease (COPD)                                                                | 53-54 |
| J) Diabetes                                                                                                    | 55-56 |
| Figure 1: Classification of Evidence Informed Recommendations                                                  | 57    |
| References (Background)                                                                                        | 58-61 |
| References from which Recommendations were Derived                                                             | 62-74 |

## Executive Summary

**Background:** Adults aging with HIV are living with the physical, social and psychological consequences of HIV disease, long term treatment, and comorbidities associated with aging. Rehabilitation including occupational therapy, physical therapy and speech-language pathology, can assist in managing the health related challenges or disability associated with HIV and aging.

**Aim:** Our aim was to develop clinical evidence-informed recommendations on rehabilitation for older adults living with HIV.

**Methods:** We conducted a knowledge synthesis, combining research evidence specific to HIV, rehabilitation and aging, with evidence on rehabilitation interventions for common comorbidities experienced by older adults with HIV. We searched for and included: highly relevant HIV-specific research addressing rehabilitation and aging (Stream A) and high-quality evidence (systematic reviews and meta-analyses) on the effectiveness of rehabilitation interventions for comorbidities commonly experienced by older adults aging with HIV (specifically bone and joint disorders, cancer, stroke, cardiovascular disease, mental health, neurocognitive decline, cardiopulmonary disease, diabetes) (Stream B). We extracted and synthesized relevant data from included studies to draft evidence-informed recommendations on rehabilitation for older adults aging with HIV. Draft specific recommendations were refined based on people living with HIV (PLHIV) and clinicians' values and preferences, reviewed by an inter professional team for GRADE (quality) rating and revision, and then circulated to a new group of PLHIV and clinicians for external endorsement and final refinement. We then consolidated the detailed specific recommendations into overarching recommendations to broadly guide rehabilitation for older adults with HIV.

**Results:** This synthesis yielded eight overarching and 52 specific recommendations. Thirty-six specific recommendations were derived from 108 moderate or high level research evidence articles (meta-analyses and systematic reviews) that described the effectiveness of rehabilitation interventions for adults living with health conditions that may be experienced by older adults with HIV. Recommendations address specific rehabilitation interventions across eight health conditions experienced by older adults with HIV: bone and joint disorders, cancer, stroke, cardiovascular disease, mental health issues, cognitive impairments, chronic obstructive pulmonary disease, and diabetes. Sixteen specific recommendations were derived from 42 research evidence articles specific to rehabilitation for older adults with HIV. The quality of evidence from which these recommendations were derived was either low or very low, consisting primarily of narrative reviews or descriptive studies with small sample sizes. These recommendations address approaches to rehabilitation assessment and interventions, and contextual factors to consider with rehabilitation of older adults living with HIV.

Overall, we established eight overarching and 52 specific evidence-informed recommendations from a combination of low level evidence specific to HIV, aging and rehabilitation, and high level research evidence describing the effectiveness of rehabilitation interventions for comorbidities that may be experienced by older adults with HIV. PLHIV and clinician values and preferences were integral in developing these recommendations. These evidence-informed recommendations

1  
2 provide a comprehensive guide for rehabilitation with older adults with HIV and those who may  
3 present with comorbidities.  
4

### 5 **How are the Recommendations Presented in this Document?**

6  
7 The evidence-informed recommendations on rehabilitation for older adults living with HIV are  
8 presented in the form of overarching and specific detailed recommendations. Specific  
9 recommendations are presented in two streams that represent the two different bodies of  
10 research evidence from which the recommendations were derived.  
11  
12

### 13 ***Specific Recommendations***

14  
15 Results for the first part of the synthesis (Stream A) include 16 recommendations derived from 42  
16 research evidence articles specific to rehabilitation for older adults living with HIV. The level of  
17 evidence from which these recommendations were derived was either low or very low, meaning  
18 the articles were mostly narrative review articles or descriptive studies (either qualitative or  
19 quantitative) with small sample sizes. Even though a recommendation may be derived from low  
20 level evidence, it still may be highly endorsed if found to make good clinical and experiential sense  
21 from the perspective of clinicians or PLHIV.  
22  
23

24  
25 Results for the second part of the synthesis (Stream B) include 36 recommendations derived from  
26 108 moderate or high level research evidence articles (meta analyses and systematic reviews)  
27 describing the effectiveness of rehabilitation interventions for adults living with comorbidities that  
28 may be experienced by older adults with HIV.  
29  
30

31 All specific recommendations were reviewed and revised three times with the synthesis team that  
32 includes researchers, clinicians and people living with HIV. All specific recommendations also were  
33 circulated to 17 PLHIV and clinicians who work in HIV care for endorsement.  
34  
35

### 36 ***Overarching Recommendations***

37  
38 To facilitate knowledge transfer and exchange, it became apparent that we needed to establish  
39 overarching recommendations that summarized the detailed recommendations in a condensed  
40 manner. We consolidated the 52 specific (or detailed) recommendations into eight overarching  
41 recommendations on rehabilitation for older adults living with HIV. These recommendations  
42 provide a broader and more general overview of the evidence synthesis.  
43  
44

### 45 **How can the Recommendations be used?**

46  
47 We present an overview of the overarching recommendations followed by the more specific  
48 (detailed) recommendations. Overarching recommendations may be used by any rehabilitation  
49 professional and other health providers who may potentially work with older adults living with HIV  
50 in their practice. Specific (or detailed) recommendations may be used by rehabilitation  
51 professionals and other health providers working with older adults living with HIV who would like  
52 more specific guidance on evidence-informed recommendations for interventions across specific  
53 comorbidities.  
54  
55

# Overarching recommendations in rehabilitation for older adults living with HIV

We offer eight overarching recommendations derived from the 52 specific recommendations that were developed from evidence specific to rehabilitation for older adults with HIV as well as high level evidence on rehabilitation interventions across comorbidities commonly experienced by older adults with HIV. The following recommendations serve as a general guide to providing rehabilitation care, treatment and support with older adults living with HIV.

For each general recommendation, where applicable, we refer to the specific (or detailed) recommendations from which they were derived.

**Summary Recommendation 1:** Rehabilitation professionals should be prepared to provide care to older adults with HIV who present with **complex comorbidities** affecting neurological, cardiorespiratory and musculoskeletal systems that may result in physical, mental and social health challenges. *(Original detailed recommendation #1)*

**Summary Recommendation 2:** Rehabilitation professionals should adopt an **individualized and interprofessional approach to practice** that is sensitive to the **unique values, preferences and needs of older adults with HIV**. This approach should include comprehensive assessment and treatment of **physical, neurocognitive and mental health impairments, uncertainty (or worrying about the future), functional activity limitations, and social exclusion** while considering the intersections between **personal and social attributes** and the **broader determinants of health**. *(Combination of detailed recommendations #2 – 8, 14, and 18)*

**Summary Recommendation 3:** **Multidisciplinary rehabilitation** including physical therapy, occupational therapy and speech-language pathology is strongly recommended across the **continuum of care** (acute, rehabilitation and community-based care) for older adults with HIV to address the multi-dimensional and episodic nature of disability attributed to HIV and its comorbidities such as bone and joint disorders, cancer, stroke, cardiovascular disease, mental health, cognitive impairment, chronic obstructive pulmonary disease (COPD) and diabetes. *(Combination of detailed recommendations #14, 18, 20 and 23)*

**Summary Recommendation 4:** Rehabilitation professionals should consider the role of **extrinsic contextual factors** such as stigma and ageism, HIV disclosure, and emotional and practical social supports on the health and well-being of older adults living with HIV. *(Combination of detailed recommendations #9-11)*



**Summary Recommendation 5:** Rehabilitation professionals should consider the role of **intrinsic contextual factors** such as self-management and spirituality on the health and well-being of older adults living with HIV. (*Combination of detailed recommendations #12-13*)

**Summary Recommendation 6:** A **combination of aerobic and resistive exercise** may be recommended for older adults living with HIV who are medically stable and living with comorbidities including bone and joint disorders, cancer, stroke, cardiovascular disease, stroke, mental health, cognitive impairment, chronic obstructive pulmonary disease (COPD), and diabetes. The frequency, intensity, time and type of exercise should be individually tailored to the specific goals and capacity of the individual and the specific comorbidity. (*Combination of detailed recommendations on exercise across all comorbidities*)

**Summary Recommendation 7:** **Cognitive rehabilitation interventions** (e.g. cognitive training, cognitive stimulation, cognitive rehabilitation) may be recommended for older adults living with HIV with mild cognitive impairment, and stroke. Inconclusive or insufficient evidence exists to support the use of **cognitive behavioural therapy** with older adults with HIV with **depression**. While cognitive rehabilitation does not appear harmful, weak evidence exists to support the use of cognitive-specific interventions to improve spatial neglect, disability, memory, and functional status for older adults who experience stroke. Rehabilitation professionals are encouraged to refer to specific clinical practice guidelines for each health condition to determine the effects of different cognitive interventions for older adults with HIV living with comorbidity. (*Combination of detailed recommendations #29, 44, 46*)

**Summary Recommendation 8:** In the absence of high level evidence on rehabilitation interventions for older adults living with HIV and comorbidities, rehabilitation professionals should refer to **existing clinical practice guidelines, systematic reviews, meta-analyses, and other forms of high level evidence for recommendations on interventions for a specific comorbidity**. These recommendations should be applied using an individualized approach incorporating the unique values, preferences, goals and needs of the individual.

# Specific recommendations in rehabilitation for older adults living with HIV

## Stream A - Recommendations Derived from Evidence Specific to Rehabilitation for Older Adults with HIV (HIV, Aging and Rehabilitation)

The following recommendations specific to HIV, rehabilitation and older adults serve as the contextual backdrop to providing rehabilitation care, treatment and support with older adults living with HIV.

We offer **16 recommendations** derived from evidence specific to rehabilitation for older adults with HIV combined with PLHIV and clinician values and preferences for clinicians to consider when working with older adults living with HIV. We include the level of evidence and citations from which each recommendation was derived. Some of the recommendations have additional explanatory notes to further explain the context and PLHIV and clinician values.

The recommendations are organized into the following six categories:

- A)** Preparedness of rehabilitation professionals
- B)** Approaches to rehabilitation assessment and treatment of older adults living with HIV
- C)** Extrinsic factors to consider with rehabilitation of older adults living with HIV
- D)** Intrinsic factors to consider with rehabilitation of older adults living with HIV
- E)** Rehabilitation approaches and
- F)** Rehabilitation interventions



# Category A

## Preparedness of Rehabilitation Professionals

**Recommendation 1:** Rehabilitation professionals should be prepared to provide care to older adults with HIV who present with **complex comorbidities** affecting neurological, cardiorespiratory and musculoskeletal systems that may result in physical, mental and social health challenges.

**Level of Evidence:** Low

### References

Grov C, Golub SA, Parsons JT, Brennan M & Karpiak SE. Loneliness and HIV-related stigma explain depression among older HIV-positive adults. *AIDS Care - Psychological and Socio-Medical Aspects of AIDS/HIV*. 2010; 22(5): 630-639.

Vance DE, Moneyham L, Fordham P & Struzick TC. A model of suicidal ideation in adults aging with HIV. *JANAC: Journal of the Association of Nurses in AIDS Care*. 2008; 19(5): 375-384.

Vance D E. Self-rated emotional health in adults with and without HIV. *Psychological Reports*. 2006; 98(1): 106-108.

Pitts M, Grierson J & Misson S. Growing older with HIV: a study of health, social and economic circumstances for people Living with HIV in Australia over the age of 50 years. *AIDS Patient Care & Stds*. 2005; 19(7): 460-465.

Heckman TG, Heckman BD, Kochman S, Sikkema KJ, Suhr J & Goodkin K. Psychological symptoms among persons 50 years of age and older living with HIV disease. *Aging & Mental Health*. 2002; 6(2): 121-128.

Heckman TG, Kochman A & Sikkema KJ. Depressive symptoms in older adults living with HIV disease: Application of the Chronic Illness Quality of Life Model. *Journal of Mental Health and Aging*. 2002; 8(4): 267-279.

Kalichman SC, Heckman T, Kochman A, Sikkema K & Bergholte J. Depression and thoughts of suicide among middle-aged and older persons living with HIV-AIDS. *Psychiatric Services*. 2000; 51(7): 903-907.

Heckman TG, Kochman A, Sikkema KJ & Kalichman SC. Depressive symptomatology, daily stressors, and ways of coping among middle-age and older adults living with HIV disease. *Journal of Mental Health and Aging*. 1999; 5(4): 311-322

Gutheil IA & Chichin ER. AIDS, older people, and social work. *Health & Social Work*. 1991; 16(4): 237-244.

Category  
B

Approaches to rehabilitation assessment and treatment of older adults with HIV

**Recommendation 2:** Rehabilitation professionals should adopt an individualized approach to assessment and treatment of older adults living with HIV to fully understand the **unique and complex needs of older adults with HIV**. This approach should consider the intersections between **personal and social attributes** (race, gender, sexual orientation, ethnocultural background and socioeconomic status) and the **broader determinants of health** (housing, access to health care, poverty, racism, financial supports, income support, education, work and parenting roles).

**Explanatory Notes:** Rehabilitation professionals should consider the uniqueness of HIV care provision and the need to be flexible in their approach working with older adults with HIV.

Evidence provides information about how personal attributes of older adults living with HIV including age, sexual orientation, gender, race and comorbidities (or concurrent health conditions) may further increase the complexity of HIV and aging. Consideration of the broader determinants of health within the context of the complex personal attributes are required for considering the unique needs of older adults with HIV to enhance the rehabilitation process.

**Level of Evidence:** Low

**References**

Plach SK, Stevens PE & Keigher S. Self-care of women growing older with HIV and/or AIDS. *Western Journal of Nursing Research*. 2005; 27(5): 534-553.

Emler CA. HIV/AIDS and Aging: A Diverse Population of Vulnerable Older Adults. *Journal of Human Behavior in the Social Environment*. 2004; 9(4): 45-63.

Keigher SM, Stevens PE & Plach SK. Midlife women with HIV: health, social, and economic factors shaping their futures. *Journal of HIV/AIDS & Social Services*. 2004; 3(1): 43-58.

Emler CA & Farkas KJ. A descriptive analysis of older adults with HIV/AIDS in California. *Health & Social Work*. 2001; 26(4): 226-234.

Heckman TG, Kochman A, Sikkema KJ, Kalichman SC, Masten J & Goodkin K. Late middle-aged and older men living with HIV/AIDS: race differences in coping, social support, and psychological distress. *Journal of the National Medical Association*. 2000; 92(9): 436-444.

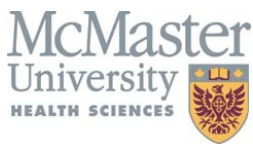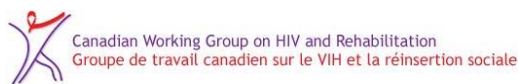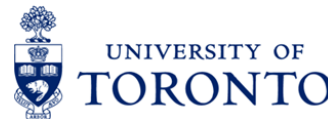

## B.1) Physical and Mental Health Assessment

**Recommendation 3:** Rehabilitation professionals should consider assessing a **diversity of physical and mental health outcomes during assessment**, which include but are not limited to, disability, quality of life, stress, coping, anxiety and depression, retirement and financial issues, sexual and familial relationships, loneliness and social networks, cognition, and daily function.

**Level of Evidence:** Very low

### References

Senior K. Growing old with HIV. *The Lancet Infectious Diseases*. 2005; 5(12): 739.

## B.2) Physical health (aerobic capacity)

**Recommendation 4:** Rehabilitation professionals should assess both **physical impairment and functional activity** with older adults living with HIV (such as limitations in aerobic capacity).

**Level of Evidence:** Very low

### References

Oursler KK, Katzel LI, Smith BA, Scott WB, Russ DW & Sorkin JD. Prediction of cardiorespiratory fitness in older men infected with the human immunodeficiency virus: clinical factors and value of the six-minute walk distance. *Journal of the American Geriatrics Society*. 2009; 57(11): 2055-2061.

Oursler KK, Sorkin JD, Smith BA & Katzel LI. Reduced aerobic capacity and physical functioning in older HIV infected men. *AIDS Research & Human Retroviruses*. 2006; 22(11): 1113-1121.

## B.3 - Mental Health

**Recommendation 5:** Rehabilitation professionals should incorporate **mental health assessment and treatment** into the care of older adults with HIV as they are at risk of experiencing low mood, anxiety, depression, and suicide ideation.

**Explanatory Notes:** Rehabilitation professionals need to be aware of stressors that impact overall health, quality of life, coping, the ability to carry out daily activities, and social inclusion. Mental health interventions that enhance the coping abilities of older adults with HIV, especially those with elevated levels of psychological distress, are urgently needed. Those who are aging with HIV may be particularly vulnerable to negative affect and emotional challenges of dealing with HIV.

**Level of Evidence:** Low

**References**

Grov C, Golub SA, Parsons JT, Brennan M & Karpiak SE. Loneliness and HIV-related stigma explain depression among older HIV-positive adults. *AIDS Care - Psychological and Socio-Medical Aspects of AIDS/HIV*. 2010; 22(5): 630-639.

Vance DE, Moneyham L, Fordham P & Struzick TC. A model of suicidal ideation in adults aging with HIV. *JANAC: Journal of the Association of Nurses in AIDS Care*. 2008; 19(5): 375-384.

Vance DE. Self-rated emotional health in adults with and without HIV. *Psychological Reports*. 2006; 98(1): 106-108.

Heckman TG, Kochman A & Sikkema KJ. Depressive symptoms in older adults living with HIV disease: Application of the Chronic Illness Quality of Life Model. *Journal of Mental Health and Aging*. 2002; 8(4): 267-279.

Heckman TG, Heckman BD, Kochman A, Sikkema KJ, Suhr J & Goodkin K. Psychological symptoms among persons 50 years of age and older living with HIV disease. *Aging & Mental Health*. 2002; 6(2): 121-128.

Kalichman SC, Heckman T, Kochman A, Sikkema K & Bergholte J. Depression and thoughts of suicide among middle-aged and older persons living with HIV-AIDS. *Psychiatric Services*. 2000; 51(7): 903-907.

Heckman TG, Kochman A, Sikkema KJ & Kalichman SC. Depressive symptomatology, daily stressors, and ways of coping among middle-age and older adults living with HIV disease. *Journal of Mental Health and Aging*. 1999; 5(4): 311-322.

**B.4 - Neurocognitive Screening**

**Recommendation 6:** Rehabilitation professionals should conduct regular **neurocognitive screening** with older adults living with HIV, and where indicated, conduct complete assessments to identify early signs of HIV-associated executive functioning deficits (e.g. ability to keep appointments, adhere to medication regimens, and follow-up on recommendations) and interventions to effectively prevent, reduce or compensate for cognitive impairments.

**Explanatory Notes:** Early and ongoing assessment of neurocognition among older adults living with HIV may promote early rehabilitation interventions helpful for improving cognitive function or preventing further deterioration. However, weak evidence exists for suggesting optimal methods to assess mild to moderate neurocognitive impairment and the optimal rehabilitation interventions that may address these impairments specifically to older adults living with HIV.

**Level of Evidence:** Low

**References**

Vance DE & Struzick TC. Addressing risk factors of cognitive impairment in adults aging with HIV: a social work model. *Journal of Gerontological Social Work*. 2007; 49(4): 51-77.

Vance DE & Burrage Jr JW. Promoting successful cognitive aging in adults with HIV: Strategies for intervention. *Journal of Gerontological Nursing*. 2006; 32(11):34-41.

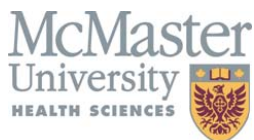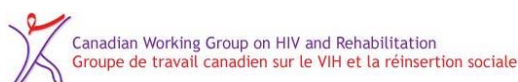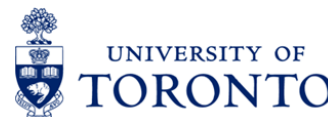

Vance DE & Burrage Jr JW. Cognitive complaints in adults aging with HIV: a pilot study. Physical & Occupational Therapy in Geriatrics. 2005; 24(2): 35-51.

Neundorfer MM, Camp CJ, Lee MM, Skrajner MJ, Malone ML & Carr JR. Compensating for cognitive deficits in persons aged 50 and over with HIV/AIDS, Journal of HIV/AIDS & Social Services. 2004; 3(1): 79-97.

Lee MM & Camp CJ. Clinical comments. Spaced retrieval: a memory intervention for HIV+ older adults. Clinical Gerontologist. 2001; 22(3/4): 131-135.

## B.5) Uncertainty

**Recommendation 7:** Rehabilitation professionals should be aware of the potential impact of **uncertainty** among older adults with HIV and the psychological importance for some older adults to know the source of their symptoms (age-related versus HIV-related versus medication-related).

**Level of Evidence:** Low

### References

Siegel K, Dean L & Schrimshaw EW. Symptom ambiguity among late-middle-aged and older adults with HIV. Research on Aging. 1999; 21(4): 595-618.

## B.6) Social Inclusion

**Recommendation 8:** Rehabilitation professionals should consider the risk of **social exclusion** older adults with HIV may face in relation to race, ethnicity, gender, and sexual orientation, in addition to their HIV status, in their assessment.

**Explanatory Notes:** Older adults living with HIV are at risk of social exclusion, dependent on personal and environmental factors.

**Level of Evidence:** Low

### References

Emler CA. An examination of the social networks and social isolation in older and younger adults living with HIV/AIDS. Health & Social Work. 2006; 31(4): 299-308.

**Category**  
**C**

**Extrinsic Factors to consider with rehabilitation of older adults living with HIV**

**C.1) Ageism and Stigma**

**Recommendation 9:** Rehabilitation professionals should be knowledgeable of **ageism** as an added layer of stigma that may increase existing HIV stigma and homophobia experienced by older adults with HIV.

**Level of Evidence:** Low

**References**

Older HIV patients deal with the double stigma of having the disease and being old. Big worry: 'Will I get to see grandkids if I tell?'. AIDS Alert. 2007; 22(2): 16-17.

Poindexter CC. Six champions speak about being over 50 and living with HIV. Journal of HIV/AIDS & Social Services. 2004; 3(1): 99-117.

**C.2) HIV Disclosure**

**Recommendation 10:** Rehabilitation professionals should understand the implications of **HIV disclosure** among older adults with HIV, be respectful of individualized choice surrounding disclosure, the potential social, legal and financial implications of disclosure, and be prepared to discuss ways to ensure clients obtain the necessary supports surrounding disclosure.

**Explanatory Notes:** Issues surrounding disclosure will be increasingly important as older adults with HIV enter long term care environments with increasing complexities with stigma having implications for disclosure.

**Level of Evidence:** Low

**References**

Poindexter C & Shippy RA. Networks of older New Yorkers with HIV: fragility, resilience, and transformation. AIDS Patient Care & Stds. 2008; 22(9): 723-733.

Shippy RA. Taking care of each other. GMHC treatment issues : the Gay Men's Health Crisis newsletter of experimental AIDS therapies. 2007; 21(2): 7-8.

Schrimshaw EW & Siegel K. Perceived barriers to social support from family and friends among older adults with HIV/AIDS. Journal of Health Psychology. 2003; 8(6): 738-752.

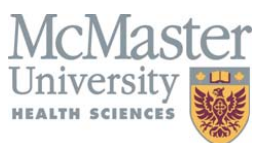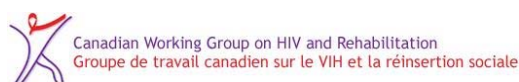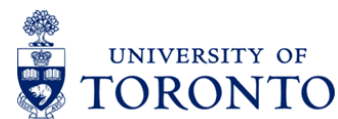



### C.3) Social Support

**Recommendation 11a:** Rehabilitation professionals should be knowledgeable about the importance of social relationships and the need for **emotional and practical social support** to maximize physical, mental and psychological well-being for older adults with HIV.

**Recommendation 11b:** Rehabilitation professionals should recognize the **emotional and practical barriers to social support** that may exist within 'family' and 'support networks' among older adults with HIV.

**Recommendation 11c:** Rehabilitation professionals should recognize the **supportive obligations** that older adults with HIV may have to family, friends and fellow people with HIV and how this might impact their overall health.

**Explanatory Notes:** There may be a variable composition of 'family' and 'support networks' among older adults with HIV as HIV positive older adults may form essential networks with others living with HIV for support and grief. These networks may be simultaneously vulnerable and durable.

**Level of Evidence:** Low

#### References

Mavandadi S, Zanjani F, Ten Have TR & Oslin DW. Psychological well-being among individuals aging with HIV: the value of social relationships. *Journal of Acquired Immune Deficiency Syndromes: JAIDS*. 2009; 51(1): 91-98.

Poindexter C & Shippy RA. Networks of older New Yorkers with HIV: fragility, resilience, and transformation. *AIDS Patient Care & Stds*. 2008; 22(9): 723-733.

Shippy RA. Taking care of each other. GMHC treatment issues : the Gay Men's Health Crisis newsletter of experimental AIDS therapies. 2007; 21(2): 7-8.

Shippy R & Karpiak SE. Perceptions of Support Among Older Adults With HIV. *Research on Aging*. 2005; 27(3): 290-306.

Chesney MA, Chambers DB, Taylor JM & Johnson LM. Social support, distress, and well-being in older men living with HIV infection. *Journal of Acquired Immune Deficiency Syndromes: JAIDS*. 2003; 33 Suppl 2: S185-193.

Schrimshaw EW & Siegel K. Perceived barriers to social support from family and friends among older adults with HIV/AIDS. *Journal of Health Psychology*. 2003; 8(6): 738-752.

Malone MA. HIV-positive women over fifty: how they cope. *AIDS Patient Care & Stds*. 1998; 12(8): 639-643.



**Category**  
**D**

**Intrinsic Factors to consider with rehabilitation of older adults living with HIV**

**D.1) Self-Management**

**Recommendation 12:** Rehabilitation professionals should consider the role of **self-management strategies** to promote health and wellness among older adults living with HIV.

**Level of Evidence:** Low

**References**

Plach SK, Stevens PE & Sharon K. Self-care of women growing older with HIV and/or AIDS. *Western Journal of Nursing Research*. 2005; 27(5): 534-553.

Heckman TG, Kochman A, Sikkema KJ, Kalichman SC, Masten J & Goodkin K. Late middle-aged and older men living with HIV/AIDS: race differences in coping, social support, and psychological distress. *Journal of the National Medical Association*. 2000; 92(9): 436-444.

**D.2) Spirituality**

**Recommendation 13:** Rehabilitation professionals may consider the importance and role of **spirituality** in the health of older adults with HIV depending on the individual.

**Explanatory Notes:** The importance of spirituality among older adults living with HIV care may vary based on religious and ethnocultural background and may be complex, balanced with potential benefits of social support and challenges to social inclusion.

**Level of Evidence:** Very low

**References**

Hines ME. Commentary on "biopsychosocial benefits of spirituality in adults aging with HIV: implications for nursing practice and research". *New challenges for providing spiritual care in aging patients with HIV*. *Journal of Holistic Nursing*. 2008; 26(2): 126-127.

Ackerman, M. Religiosity and Biopsychosocial Outcomes in HIV: A SEM Comparison of Gender, Race, and Sexual Orientation. *Southern Online Journal of Nursing Research*. 2008; 8(4) at: [http://www.resourcenter.net/images/snrs/files/sojnr\\_articles2/Vol08Num04A.html#Ackerman.\(2008\).](http://www.resourcenter.net/images/snrs/files/sojnr_articles2/Vol08Num04A.html#Ackerman.(2008).) "2008 SNRS abstracts -- A." *Southern Online Journal of Nursing Research* 8(4): 1-1.

Vance DE & Woodley RA Strengths and distress in adults who are aging with HIV: a pilot study. *Psychological Reports*. 2005; 96(2): 383-386.

Vance DE & Robinson FP. Reconciling successful aging with HIV: a biopsychosocial overview. *Journal of HIV/AIDS & Social Services*. 2004; 3(1): 59-78.

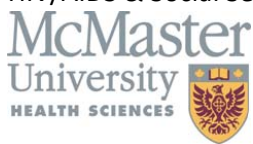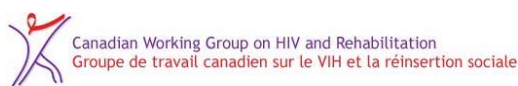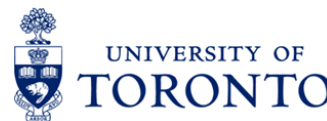

# Category E

## Rehabilitation Approaches

### E.1) Interprofessional Practice

**Recommendation 14:** Rehabilitation professionals should use an **interprofessional approach to practice** that is **sensitive** to the unique and individualized values and preferences of older adults with HIV while considering issues of culture, stigma and discrimination. Specifically rehabilitation professionals should **communicate** information surrounding care, treatment and education in a way that is **tailored to the specific needs** of older adults with HIV to optimize physical and mental health and well-being.

**Level of Evidence:** Low to very low

#### References

Shippy RA & Karpiak SE. The aging HIV/AIDS population: fragile social networks. *Aging & Mental Health*. 2005; 9(3): 246-254.

Hillman JL & Stricker G. Some issues in the assessment of HIV among older adult patients. *Psychotherapy*. 1998; 35 (4): 483-489.

### E.2) Complementary and Alternative Medicine

**Recommendation 15:** Rehabilitation professionals should inquire about the nature and extent to which older adults with HIV use **complementary and alternative medicine (CAM)** and consider the potential benefits and side effects of CAM interventions.

**Explanatory Notes;** Lifestyle strategies might include use of complementary and alternative medicines and therapies. Given the high number of older adults with HIV taking complementary and alternative medicine (CAM) in combination or in lieu of antiretrovirals, it is important for rehabilitation professionals to consider the use of CAM among older adults living with HIV.

**Level of Evidence:** Low

#### References

Wutoh AK, Brown CM, Kumoji EK, Daftary MS, Jones T, Barnes NA & Powell NJ. Antiretroviral adherence and use of alternative therapies among older HIV-infected adults. *Journal of the National Medical Association*. 2001; 93(7-8): 243-250.

1  
2  
3  
4  
5  
6  
7  
8  
9  
10  
11  
12  
13  
14  
15  
16  
17  
18  
19  
20  
21  
22  
23  
24  
25  
26  
27  
28  
29  
30  
31  
32  
33  
34  
35  
36  
37  
38  
39  
40  
41  
42  
43  
44  
45  
46  
47  
48  
49  
50  
51  
52  
53  
54  
55  
56  
57  
58  
59  
60

**Category**  
**F**

**Rehabilitation Interventions**

**Recommendation 16: Exercise (specifically progressive resistive exercise) may be recommended** for associated improvements in strength, body composition, and physical fitness in older adults living with HIV. Specifically, resistive exercise may be considered for use among older adults who are frail to increase muscle strength and mitigate wasting.

**Explanatory Notes:** A paucity of rehabilitation intervention evidence existed specific to older adults living with HIV. Exercise was one intervention where although there was low level evidence comprised of a prospective single group study design, this recommendation was highly GRADED by the synthesis team. Evidence on neurocognitive interventions such as space retrieval and teleconferencing support interventions also existed suggesting that group cognitive interventions focused on increasing adaptive coping and social support may help to improve the health-related quality of life of older adults living with HIV and that teleconferencing support or coping group interventions may help to improve psychological well-being, however these too were low levels of evidence and these interventions were not highly GRADED by the synthesis team. Concerns were raised in highlighting these interventions over other interventions used in clinical practice only because there was some form of evidence published in this area. As a result, we refrained from developing specific recommendations for rehabilitation interventions that did not have evidence and were not strongly graded by the team.

**Level of Evidence:** Low

**References**

de Souza PML, Filho WJ, Santarem JM, da Silva AR, Li HY & Burattini MN. Progressive resistance training on elderly HIV+ patients: Does it work? American Journal of Infectious Diseases. 2008; 4(4): 215-219.

Evans WJ, Roubenoff R & Shevitz A. Exercise and the treatment of wasting: aging and human immunodeficiency virus infection. Seminars in Oncology. 1998; 25(2 Suppl 6): 112-122.

**Additional References (interventions not included in the specific recommendations)**

Heckman TG, Barcikowski R, Ogles B, Suhr J, Carlson B, Holroyd K & Garske J. A Telephone-Delivered Coping Improvement Group Intervention for Middle-Aged and Older Adults Living With HIV/AIDS. Annals of Behavioral Medicine. 2006; 32(1): 27-38.

Nokes KM, Chew L & Altman C. Using a telephone support group for HIV-positive persons aged 50+ to increase social support and health-related knowledge. AIDS Patient Care & Stds. 2003; 17(7): 345-351.

Heckman TG, Kochman A, Sikkema KJ, Kalichman SC, Masten J, Bergholte J & Catz S. A pilot coping improvement intervention for late middle-aged and older adults living with HIV/AIDS in the USA. AIDS Care. 2001; 13(1): 129-139.

Lee MM & Camp CJ. Clinical comments. Spaced retrieval: a memory intervention for HIV+ older adults. Clinical Gerontologist. 2001; 22(3/4): 131-135.

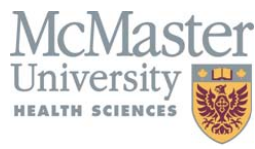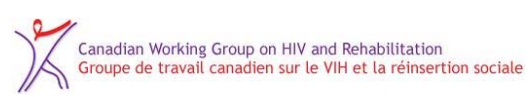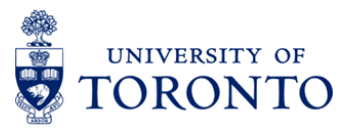

# Specific recommendations in rehabilitation for older adults living with HIV

## Stream B- Recommendations for Rehabilitation Interventions for Older Adults with HIV who may experience Common Comorbidities

The following recommendations serve as a guide for rehabilitation interventions with older adults living with HIV who may be living with common comorbidities. No guidelines exist on rehabilitation interventions specific to older adults with HIV and comorbidities. While high level evidence exists for exercise and HIV, these systematic reviews were not specifically focused with older adults with HIV.

For Stream B, we included systematic reviews or meta-analyses so the rating of the evidence was either high (systematic reviews published in the Cochrane Library) or moderate (other systematic reviews or meta-analyses not published in the Cochrane Library). However, the wording of our recommendation depended on how well or to what extent we could make the leap from the condition-specific evidence to a recommendation for rehabilitation specific to older adults living with HIV and these conditions. Hence, PLHIV and clinician values and preferences were integral to determining the strength of the recommendation, based on whether the recommendation made sense clinically and experientially for older adults living with HIV and that the intervention posed minimal risk or harm to older adults living with HIV.

We offer **36 recommendations** that include specific considerations when applying rehabilitation interventions for adults living with HIV. We then indicate the level of evidence and citations of evidence (references) from which the recommendations were derived. Given this synthesis was not specific to older adults, we also provide the age of participants represented in the evidence, to help clinicians determine the applicability of the recommendation to older adults with HIV.

The recommendations are presented based on interventions across 10 categories specific to:

**A) Older adults**

**B) HIV/AIDS**

And eight comorbidities that may be experienced by older adults with HIV:

**C) Bone and joint disorders**

**D) Cancer**

**E) Stroke**

**F) Cardiovascular disease**

**G) Mental health challenges**

**H) Cognitive impairments**

**I) Chronic Obstructive Pulmonary Disease (COPD) and**

**J) Diabetes**

1  
2 For each comorbidity, we provide a background on the prevalence and incidence of the condition  
3 among people living with HIV, and the nature of disability that may be experienced by adults living  
4 with HIV and these comorbidities.  
5  
6  
7  
8  
9  
10  
11  
12  
13  
14  
15  
16  
17  
18  
19  
20  
21  
22  
23  
24  
25  
26  
27  
28  
29  
30  
31  
32  
33  
34  
35  
36  
37  
38  
39  
40  
41  
42  
43  
44  
45  
46  
47  
48  
49  
50  
51  
52  
53  
54  
55

For peer review only

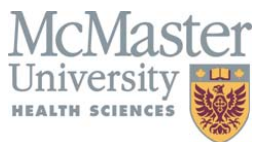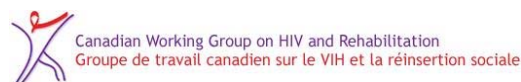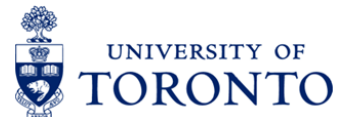

## Category

## A

## Older Adults Living with HIV

The prevalence of older adults with HIV in Canada and the United States is increasing. As of 2008, approximately 10% of Canadians living with HIV were older adults (50 years or older). In Canada, the rate of new HIV positive reports for older adults increased from 11% in 1999 to 15% in 2008 (1).

In 2005, the prevalence of older adults living with HIV, 50 years and older in the United States was 24%. Older adults accounted for 15% of all new HIV cases in 2005 (2)

Among Canadians living with HIV 50 years and older in 2005, the majority was men (86%), white (74%), 13% were Aboriginal and 6% were of African descent (1). Newly reported HIV positive cases for women ages 50 years and older increased from 11% between 1985-1996 to approximately 16% between 1997- 2008 (1).

Among adults living with HIV, 50 years and older, 18% reported having one comorbidity, 28% reported having two, and 54% reported having three or more (3). Over 50% of older adults living with HIV reported taking antiretroviral therapy (3). Long-term antiretroviral therapy may be associated with several metabolic and anatomic complications, including abnormal or degenerative conditions of the body's adipose tissue (lipodystrophy), insulin resistance, diabetes, kidney disease and an abnormal amount of lipids in the blood (dyslipidemia) (3-6).

#### Disability Experienced by Older Adults with HIV

Challenges faced by adults living with HIV, 50 years and over may include low bone mass density (which increases the risk of osteoporotic fractures), fatigue, weight loss, night sweats and diminished appetite (4, 7-10). Comorbidities such as cardiovascular disease, osteoporosis, decline of renal function, liver disease and dementia are more common among older adults living with HIV and can complicate the disease process and management (4, 11, 12).

We present three recommendations for exercise and occupational therapy for older adults living with HIV.



**A.1 – Exercise**

**Recommendation 17: Regular forms of exercise** including (strength/resistance training, aerobic/cardiovascular endurance training, and balance/stability training) may be strongly recommended for older adults with HIV who are medically stable to reduce fall rates, improve functional and physical performance, improve cardiopulmonary fitness, reduce depressive symptoms, and improve mood and quality of life.

Specifically:

**Recommendation 17a: Exercise-specific interventions** involving **gait, balance, co-ordination and functional exercises, and muscle strengthening** is strongly recommended for its beneficial effect on balance.

**Recommendation 17b: Aerobic exercise** is strongly recommended to improve cardiorespiratory fitness and may also be beneficial for cognitive function specifically improvements in motor function, cognitive speed, auditory and visual attention.

**Recommendation 17c: Progressive resistive exercise** two to three times a week may be recommended to improve physical function. Clients should be monitored as evidence suggests adverse effects might occur in older people at higher risk of injury (i.e. frail or recently ill older people).

**Recommendation 17d: Home-based exercise programs** may be recommended for those who are medically stable as evidence suggests home-based exercise may be just as beneficial to centre-based exercise (rehabilitation) programs.

**Level of Evidence:** High (combination of Cochrane systematic reviews and meta-analyses - not Cochrane)

**Age of Participants in Research Evidence:** >50 years (and >60 years in majority of evidence)

**References**

Liu CJ & Latham NK. Progressive resistance strength training for improving physical function in older adults. *Cochrane Database of Systematic Reviews* 2009, Issue 3. Art. No.: CD002759. DOI: 10.1002/14651858.CD002759.pub2.

Angevaren M, Aufdemkampe G, Verhaar HJJ, Aleman A & Vanhees L. Physical activity and enhanced fitness to improve cognitive function in older people without known cognitive impairment. *Cochrane Database of Systematic Reviews* 2008, Issue 3. Art. No.: CD005381. DOI: 10.1002/14651858.CD005381.pub3.

Gu MO & Conn VS. Meta-analysis of the effects of exercise interventions on functional status in older adults. *Research in Nursing & Health*. 2008; 31(6): 594–603 [Published online 10 June 2008 in Wiley InterScience]. DOI: 10.1002/nur.20290.

Baker MK, Atlantis E & Fiatarone Singh MA. Multi-modal exercise programs for older adults: systematic review. *Age and Ageing*. 2007; 36(4): 375–381. DOI:10.1093/ageing/afm054.

de Morton N, Keating JL & Jeffs K. Exercise for acutely hospitalised older medical patients. *Cochrane Database of Systematic Reviews* 2007, Issue 1. Art. No.: CD005955. DOI: 10.1002/14651858.CD005955.pub2.

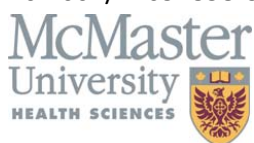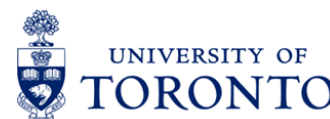



1  
2  
3 Howe TE, Rochester L, Jackson A, Banks PMH & Blair VA. Exercise for improving balance in older people.  
4 *Cochrane Database of Systematic Reviews* 2007, Issue 4. Art. No.: CD004963. DOI:  
5 10.1002/14651858.CD004963.pub2.  
6

7  
8 Sjosten N & Kivela SL. The effects of physical exercise on depressive symptoms among the aged: a  
9 systematic review. *International Journal of Geriatric Psychiatry*. 2006; 21(5): 410-418.  
10

11 Ashworth NL, Chad KE, Harrison EL, Reeder BA & Marshall SC. Home versus center based physical activity  
12 programs in older adults. *Cochrane Database of Systematic Reviews* 2005, Issue 1. Art.No.: CD004017. DOI:  
13 10.1002/14651858.CD004017.pub2.  
14

15 Huang G, Gibson CA, Tran ZV & Osness WH. Controlled endurance exercise training and VO2max changes in  
16 older adults: a meta-analysis. *Preventive Cardiology*. 2005; 8(4): 217-225.  
17

18 Arent SM, Landers DM & Etnier JL. The effects of exercise on mood in older adults: a meta-analytic review.  
19 *Journal of Aging and Physical Activity*. 2000; 8(4):407-430.  
20  
21

## 22 A.2 – Rehabilitation

23  
24 **Recommendation 18: Multidisciplinary forms of rehabilitation is strongly recommended**  
25 **for older adults with HIV who are hospitalized to promote earlier discharge directly home**  
26 **from hospital and reduced costs associated with hospitalization.**  
27  
28

29  
30 **Level of Evidence:** High (combination of Cochrane systematic reviews and meta-analyses - not Cochrane)  
31

32 **Age of Participants in Research Evidence:** >50 years (and >60 years in majority of evidence)  
33

### 34 References

35 Liu CJ & Latham NK. Progressive resistance strength training for improving physical function in older adults.  
36 *Cochrane Database of Systematic Reviews* 2009, Issue 3. Art. No.: CD002759. DOI:  
37 10.1002/14651858.CD002759.pub2.  
38

39 Angevaren M, Aufdemkampe G, Verhaar HJJ, Aleman A & Vanhees L. Physical activity and enhanced fitness  
40 to improve cognitive function in older people without known cognitive impairment. *Cochrane Database of*  
41 *Systematic Reviews* 2008, Issue 3. Art. No.: CD005381. DOI: 10.1002/14651858.CD005381.pub3.  
42  
43

44 Gu MO & Conn VS. Meta-analysis of the effects of exercise interventions on functional status in older  
45 adults. *Research in Nursing & Health*, 2008, 31, 594–603. Published online 10 June 2008 in Wiley  
46 InterScience. DOI: 10.1002/nur.20290.  
47

48 Baker MK, Atlantis E & Fiatarone Singh MA. Multi-modal exercise programs for older adults: systematic  
49 review. *Age and Ageing* 2007; 36: 375–381. doi:10.1093/ageing/afm054.  
50

51 de Morton N, Keating JL & Jeffs K. Exercise for acutely hospitalised older medical patients. *Cochrane*  
52 *Database of Systematic Reviews* 2007, Issue 1. Art. No.: CD005955. DOI:  
53 10.1002/14651858.CD005955.pub2.  
54  
55

1  
2  
3 Howe TE, Rochester L, Jackson A, Banks PMH & Blair VA. Exercise for improving balance in older people.  
4 *Cochrane Database of Systematic Reviews* 2007, Issue 4. Art. No.: CD004963. DOI:  
5 10.1002/14651858.CD004963.pub2.  
6

7  
8 Sjosten N & Kivela SL. The effects of physical exercise on depressive symptoms among the aged: a  
9 systematic review. *International Journal of Geriatric Psychiatry*. 2006; 21(5): 410-418.  
10

11 Ashworth NL, Chad KE, Harrison EL, Reeder BA & Marshall SC. Home versus center based physical activity  
12 programs in older adults. *Cochrane Database of Systematic Reviews* 2005, Issue 1. Art.No.: CD004017. DOI:  
13 10.1002/14651858.CD004017.pub2.  
14

15 Huang G, Gibson CA, Tran ZV & Osness WH. Controlled endurance exercise training and VO2max changes in  
16 older adults: a meta-analysis. *Preventive Cardiology*. 2005; 8(4): 217-225.  
17

18  
19 Arent S M, Landers D M & Etnier J L. The effects of exercise on mood in older adults: a meta-analytic  
20 review. *Journal of Aging and Physical Activity*. 2000; 8:407-430.  
21

22  
23 **A.3 – Occupational Therapy**

24 **Recommendation 19: Occupational therapy** may be an important component of  
25 rehabilitation for older adults living with HIV with functional impairments and is strongly  
26 recommended for elderly community dwellers, specifically for advising on adaptive  
27 devices; mobility devices; energy conservation; cognitive training; training of skills to use  
28 adaptive devices to enhance functional ability, and to enhance social participation and  
29 quality of life.  
30  
31  
32

33 **Level of Evidence:** Moderate (systematic review but not Cochrane)  
34

35 **Age of Participants in Research Evidence:** >60 years  
36

37 **Reference**

38 Steultjens EM, Dekker J, Bouter LM, Jellema S, Bakker EB & van den Ende CH. Occupational therapy for  
39 community dwelling elderly people: a systematic review. *Age & Ageing*. 2004; 33(5): 453-460.  
40  
41  
42  
43  
44  
45  
46  
47  
48  
49  
50  
51  
52  
53  
54  
55

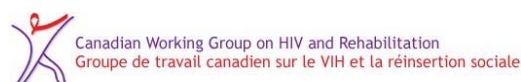

## Category

## B

## HIV/AIDS

We present one recommendation for exercise specific to older adults living with HIV.

**Recommendation 20: Aerobic and resistive exercise** may be recommended for at least 20 minutes at least 3 times per week for at least 5 weeks for older adults living with HIV who are medically stable with the potential to maintain or enhance outcomes of cardiopulmonary fitness, weight and body composition, strength, and quality of life.

**Explanatory Notes:** Although this recommendation was derived from high level evidence on HIV and exercise, the evidence is not specific to older adults with HIV. Clinicians are encouraged to use this recommendation in combination with the exercise recommendation #16 that was derived from lower level evidence, but specifically to older adults with HIV.

**Level of Evidence:** High (Cochrane systematic reviews)

**Age of Participants in Research Evidence:** Age range 18-66 years

**References**

O'Brien K, Nixon S, Tynan AM & Glazier R. Aerobic exercise interventions for adults living with HIV/AIDS. *Cochrane Database of Systematic Reviews* 2010, Issue 8. Art. No.: CD001796. DOI: 10.1002/14651858.CD001796.pub3.

O'Brien K, Tynan AM, Nixon S & Glazier RH. Effects of progressive resistive exercise in adults living with HIV/AIDS: systematic review and meta-analysis of randomized trials. *AIDS Care*. 2008; 20(6): 631-653. Available from: <http://dx.doi.org/10.1080/09540120701661708>.

1  
2  
3  
4  
5  
6  
7  
8  
9  
10  
11  
12  
13  
14  
15  
16  
17  
18  
19  
20  
21  
22  
23  
24  
25  
26  
27  
28  
29  
30  
31  
32  
33  
34  
35  
36  
37  
38  
39  
40  
41  
42  
43  
44  
45  
46  
47  
48  
49  
50  
51  
52  
53  
54  
55  
56  
57  
58  
59  
60

**Category**  
**C**

**Bone and Joint Disorders**

The prevalence of low bone mineral density (BMD) among older adults living with HIV ranges from 27%-39%; and the prevalence of osteoporosis is 15% - 16% which is 4 times greater than adults without HIV. Prevalence rates for osteopenia are 20-52% and 4% for osteonecrosis (7, 13-16).

HIV infection has been independently linked to decreased BMD among men and women (10, 13). Men ages 50 years and older in general have low BMD, but this levels of BMD are lower among older men living with HIV compared to men in the same age group living without HIV (10). The prevalence of low peak bone mass are higher among women living with HIV compared to women who are not living with HIV, younger in age, have a moderate to high body weight, no history of bone fractures and who has or is currently using estrogen (13).

Lifestyle factors among people living with HIV associated with low peak bone mass include cigarette smoking (10, 17). With an increasing prevalence of smoking among people living with HIV, the prevalence of osteoporosis may increase among this population (4, 18).

Ethnicity is a genetic factor strongly associated with BMD (13). People of African descent have higher BMD and a lower risk of developing osteoporosis compared to the rest of the population, but the presence of an HIV infection can reduce BMD and increase risk of osteoporotic fractures regardless of ethnicity (13).

Rheumatic Disorders are medical problems affecting the joints and connective tissue (19). They include spondyloarthropathic arthritis, also known as Reiter’s syndrome which has a prevalence rate ranging from 5-10% among adults with HIV (19). The prevalence rate for psoriatic arthritis is 1-32% among adults living with HIV (19).

**Disability Experienced by Adults with Bone and Joint Disorders**

Challenges faced by adults living with HIV with bone and joint disorders include prolonged periods of immobility (decreased activity levels), increased bone loss, reduced weight bearing, decreased joint range-of-motion, and pain in joints and areas closest to joint (13, 16, 19).

Low BMD in the femoral neck and lumbar spine increases the risk of osteoporotic fractures for women living with HIV (13). Older men living with HIV with low BMD have increased chances of fractures and hospitalization from fracture (7, 10). Fractures can lead to activity limitations (such as decreased mobility) as well as social participation restrictions.

We present four recommendations for exercise, rehabilitation and self-management interventions for older adults living with HIV and bone and joint disorders.

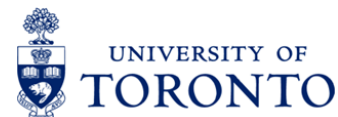

## C.1 – Exercise

**Recommendation 21a: Supervised exercise sessions should be recommended to older adults living with HIV with knee and/or hip osteoarthritis (OA) who are medically stable to improve pain and physical function.**

**Explanatory Notes:** Evidence more strongly suggests improvements with knee osteoarthritis (OA) rather than hip OA. Exercise programs that involve more than 12 directly supervised sessions may be associated with greater improvements in knee pain and physical function. While this evidence was not specific to older adults with knee or hip OA, it did include older adults with OA in the systematic review.

**Recommendation 21b: A combination of low impact exercise in the form of jogging, stair climbing and walking, combined with high-magnitude resistance training should be recommended for older adults with HIV to preserve bone mineral density.**

**Explanatory Notes:** Evidence is specific to postmenopausal women, but there is no reason that men may not benefit from these exercise interventions as well.

**Level of Evidence:** High (knee OA) to moderate (hip OA) (systematic review but not Cochrane)

**Age of Participants in Research Evidence:** >50 years

### References

Fransen M & McConnell S. Exercise for osteoarthritis of the knee. *Cochrane Database of Systematic Reviews* 2008, Issue 4. Art. No.: CD004376. DOI: 10.1002/14651858.CD004376.pub2. Available from: <http://onlinelibrary.wiley.com/doi/10.1002/14651858.CD004376.pub2/pdf>

Fransen M & McConnell S, Hernandez-Molina G, Reichenbach S. Exercise for osteoarthritis of the hip. *Cochrane Database of Systematic Reviews* 2009, Issue 3. Art. No.: CD007912. DOI: 10.1002/14651858.CD007912. Available from: <http://onlinelibrary.wiley.com/doi/10.1002/14651858.CD007912/full>

Martyn-St James M & Carroll S. A meta-analysis of impact exercise on postmenopausal bone loss: The case for mixed loading exercise programmes. *Br J Sports Med*. 2009; 43(12): 898-908. Originally published online November 3, 2008. DOI: 10.1136/bjsm.2008.052704. Available from: <http://bjsportmed.com/content/43/12/898.abstract>.

**Recommendation 22: Balance and strengthening exercises should be part of an overall exercise program to decrease falls and risk of fall-related fractures for older adults with HIV and low bone mineral density (BMD).**

**Explanatory Notes:** Balance and strengthening exercises are important for overall aging and older adults but particularly for older adults with HIV who may have nutritional challenges and issues with muscle-wasting. Balance training is also particularly important for older adults with HIV who may have peripheral neuropathy resulting in balance impairments placing them at increased risk for falls.



**Level of Evidence:** Moderate (systematic review but not Cochrane)

**Age of Participants in Research Evidence:** >50 years

**References**

de Kam D, Smulders E, Weerdesteyn V & Smits-Engelsman BC. Exercise interventions to reduce fall-related fractures and their risk factors in individuals with low bone density: a systematic review of randomized controlled trials. *Osteoporosis International*. 2009; 20(12): 2111-212. DOI: 10.1007/s00198-009-0938-6.

**C.2 - Rehabilitation**

**Recommendation 23: Multidisciplinary rehabilitation teams** comprised of an occupational therapy (OT) and physical therapy (PT) across the **continuum of care** should be recommended for older adults with HIV who sustain a hip fracture. Specifically, **inpatient geriatric rehabilitation programs** are strongly recommended and may be an ideal intervention as they have the potential to reduce nursing home admission, mortality and improve functional status.

**Explanatory Notes:** Weak evidence exists on the effect of rehabilitation interventions for older adults post hip fracture on physical, psychosocial outcomes, mortality and length of stay. Limitations in the evidence are related to the large variability in interventions and outcomes assessed.

**Level of Evidence:** Moderate (systematic review but not Cochrane)

**Age of Participants in Research Evidence:** >50 years

**References**

Bachmann S, Finger C, Huss A, Egger M, Stuck AE & Clough-Gorr KM. Inpatient rehabilitation specifically designed for geriatric patients: systematic review and meta-analysis of randomised controlled trials. *BMJ (Clinical research ed.)*. 2010; 340: c1718. DOI: <http://dx.doi.org/10.1136/bmj.c1718>.

Crotty M, Unroe K, Cameron ID, Miller M, Ramirez G & Couzner L. Rehabilitation interventions for improving physical and psychosocial functioning after hip fracture in older people. *Cochrane database of systematic reviews* 2010, DOI: 10.1002/14651858.CD007624.pub3. Available from: <http://summaries.cochrane.org/CD007624/rehabilitation-interventions-for-improving-physical-and-psychosocial-functioning-after-hip-fracture-in-older-people>

Chudyk AM, Jutai JW, Petrella RJ & Speechley M. Systematic Review of Hip Fracture Rehabilitation Practices in the Elderly. *Archives of Physical Medicine and Rehabilitation*. 2009; 90(2): 246-262.

Handoll HHG, Cameron ID, Mak JCS, & Finnegan TP. Multidisciplinary rehabilitation for older people with hip fractures. *Cochrane Database of Systematic Reviews* 2009, Issue 4. Art. No.: CD007125. DOI: 10.1002/14651858.CD007125.pub2. Available from: <http://summaries.cochrane.org/CD007125/multidisciplinary-rehabilitation-of-older-patients-with-hip-fractures>.

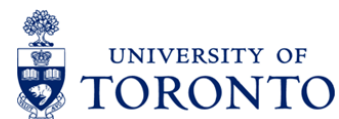

1  
2 Halbert J, Crotty M, Whitehead C, Cameron I, Kurrle S, Graham S, Handoll H, Finnegan T, Jones T, Foley A &  
3 Shanahan M. Multi-disciplinary rehabilitation after hip fracture is associated with improved outcome: A  
4 systematic review. Journal of Rehabilitation Medicine. 2007; 39(7): 507-512.  
5

6  
7 Handoll HH, Sherrington C & Parker MJ. Mobilisation strategies after hip fracture surgery in adults.  
8 Cochrane database of systematic reviews 2004, Issue 1: 1-94. DOI: 10.1002/14651858.CD001704.pub3.  
9 Available from: <http://onlinelibrary.wiley.com/doi/10.1002/14651858.CD001704.pub4/full>.  
10

### 11 C.3 – Self-Management Programs

12  
13 **Recommendation 24: Self-management** programs may be considered as a component of  
14 a rehabilitation program to address disability and pain for older adults living with HIV and  
15 arthritis.  
16

17  
18 **Explanatory Notes:** Self-management strategies may be particularly useful in the context of HIV whereby  
19 there may be limitations in access to rehabilitation services for older adults with HIV.  
20

21  
22 **Level of Evidence:** Moderate (systematic review but not Cochrane)  
23

24 **Age of Participants in Research Evidence:** Mean age 61 years  
25

#### 26 Reference

27 Warsi A, LaValley MP, Wang PS, Avorn J & Solomon DH. Arthritis self-management education programs: A  
28 meta-analysis of the effect on pain and disability. Arthritis and Rheumatism. 2003; 48(8): 2207-2213.  
29  
30  
31  
32  
33  
34  
35  
36  
37  
38  
39  
40  
41  
42  
43  
44  
45  
46  
47  
48  
49  
50  
51  
52  
53  
54  
55



**Category**

**D**

**Cancer**

Since the introduction of combination antiretroviral therapy the incidence of AIDS associated cancers such as Kaposi’s sarcoma (KS) and Non-Hodgkin’s Lymphoma (NHL) have declined (20).

However, incidence rates of non-AIDS associated cancers among adults living with HIV have increased, including anal cancer (43%), vaginal cancer (21%), and cervical cancer (19%) Hodgkin Lymphoma (15%), liver cancer (8%), lung cancer (3%), and melanoma cancers (3%) (20, 21). The pattern of breast cancer in adults living with HIV is unusual, as only a few cases have been reported (22, 23). Breast cancer is the most common form of cancer among women in the general population. While no increased incidence of breast cancer in women living with HIV has been identified, this form of cancer is becoming an increasingly important comorbidity for women living with HIV (22, 24).

Current evidence suggests low rates of screening for non-AIDS associated cancers among people living with HIV (24, 25).

**Disability Experienced by Adults living with Cancer**

Non-AIDS associated cancers can cause fatigue, weight loss, night sweats and diminished appetite (9). Symptoms of Non AIDS-associated cancers are often similar to symptoms of HIV/AIDS (25).

We present five recommendations pertaining to exercise for older adults living with HIV and general, lung, breast or metastatic cancer.

**Di) - Cancer (General)**

**Di-1 – Exercise**

**Recommendation 25:** A combination of aerobic and resistance exercise at moderate intensity may be recommended for older adults living with HIV and cancer to reduce cancer-related fatigue during and after treatment for cancer. Any exercise intervention should be individualized based on the targeted health outcome and cancer type.

**Level of Evidence:** High (Cochrane systematic review)

**Age of Participants in Research Evidence:** Mean age majority >50 years

**References**

Brown J, Huedo-Medina TB, Pescatello LS, Pescatello SM, Ferrer RA & Johnson BT. Efficacy of Exercise Interventions in Modulating Cancer-Related Fatigue among Adult Cancer Survivors: A Meta-Analysis. *Cancer Epidemiol Biomarkers Prev.* 2011; 20:123-133. DOI:10.1158/1055-9965.EPI-10-0988.



1  
2 Velthuis MJ, Agasi-Idenburg SC, Aufdemkampe G & Wittink HM. The Effect of Physical Exercise on Cancer-  
3 related Fatigue during Cancer Treatment: a Meta-analysis of Randomised Controlled Trials. Clinical  
4 Oncology. 2010; 22(3) 208–221. DOI: 10.1016/j.clon.2009.12.005.  
5

6  
7 Cramp F & Daniel J. Exercise for the management of cancer-related fatigue in adults. Cochrane Database of  
8 Systematic Reviews 2008, Issue 2. Art. No.: CD006145. DOI: 10.1002/14651858.CD006145.pub2. Available  
9 from: <http://summaries.cochrane.org/CD006145/the-effect-of-exercise-on-fatigue-associated-with-cancer>.  
10

11 **Recommendation 26: A combination of aerobic and resistive exercise** at least twice a  
12 week for at least 2 weeks at 50-90% maximum oxygen capacity (VO<sub>2</sub>max) intensity is safe  
13 and may be recommended for older adults living with cancer for improvements in  
14 physiological measures, symptoms, physical and psychosocial functioning of patients and  
15 health-related quality of life. Positive effects of exercise may vary as a function of the type  
16 of cancer; the stage of disease; the medical treatment; the nature, intensity, and duration  
17 of the exercise program; and the lifestyle of the individual.  
18  
19  
20

21  
22 **Level of Evidence:** Moderate (systematic review but not Cochrane)  
23

24 **Age of Participants in Research Evidence:** Age ranged 16-71 years  
25

## 26 References

27  
28 Spence RR, Heesch KC & Brown WJ. Exercise and cancer rehabilitation: A systematic review. Cancer  
29 Treatment Reviews. 2010; 36(2) 185–194. DOI: 10.1016/j.ctrv.2009.11.003.  
30

31  
32 Knols R, Aaronson NK, Uebelhart D, Fransen J & Aufdemkampe D. Physical Exercise in Cancer Patients  
33 During and After Medical Treatment: A Systematic Review of Randomized and Controlled Clinical Trials. J  
34 Clin Oncol. 2005; 23(16): 3830-3842.  
35

## 36 Dii) Lung Cancer

### 37 Dii-1- Exercise

38  
39 **Recommendation 27: Exercise** may be beneficial for self-empowerment and should be  
40 recommended for older adults living with HIV who are also living with **lung cancer** who are  
41 medically stable.  
42  
43  
44

45  
46 **Explanatory Notes:** Weak evidence exists on the effect of exercise among adults with lung cancer. Given  
47 the increasing prevalence of lung cancer as a non-AIDS related cancer for people living with HIV, the role for  
48 exercise may be particularly important with respect to this recommendation. Furthermore, rehabilitation  
49 professionals may want to consider their role in addressing smoking cessation among their clients living  
50 with HIV.  
51

52  
53 **Level of Evidence:** High (Cochrane systematic review)  
54  
55

**Age of Participants in Research Evidence:** Mean age >50 years

**Reference**

Solà I, Thompson EM, Subirana Casacuberta M, Lopez C & Pascual A. Non-invasive interventions for improving well-being and quality of life in patients with lung cancer. *Cochrane Database of Systematic Reviews* 2004, Issue 4. Art. No.: CD004282. DOI: 10.1002/14651858.CD004282.pub2.

**Diii) Breast Cancer**

**Diii-1- Exercise**

**Recommendation 28a:** Supervised aerobic exercise programs should be included during **breast cancer** treatment for the management of cancer related fatigue for older women living with HIV and breast cancer who are medically stable.

**Recommendation 28b:** A **combination of aerobic and resistive exercise** at least 3 times per week for at least 6 weeks, 30-40 minutes per session, at moderate intensity (e.g. rate of perceived exertion 11-13 out of 20) appears to be safe and may be recommended for older women living with HIV undergoing or who have undergone treatment for **breast cancer** and who are medically stable for potential improvements in cardiopulmonary fitness, physical functioning, fatigue, and body composition and quality of life.

**Level of Evidence - High** (Cochrane systematic review)

**Age of Participants in Research Evidence:** Mean age majority >50 years

**References**

Brown J, Huedo-Medina TB, Pescatello LS, Pescatello SM, Ferrer RA & Johnson BT. Efficacy of Exercise Interventions in Modulating Cancer-Related Fatigue among Adult Cancer Survivors: A Meta-Analysis. *Cancer Epidemiol Biomarkers Prev.* 2011; 20: 123-133. DOI:10.1158/1055-9965.EPI-10-0988

Chan DNS, Lui LYY & So WK. Effectiveness of exercise programmes on shoulder mobility and lymphoedema after axillary lymph node dissection for breast cancer: systematic review. *Journal of Advanced Nursing.* 2010; 66(9): 1902-1914.

McNeely ML, Campbell K, Ospina M, Rowe BH, Dabbs K, Klassen TP, Mackey J & Courneya K. Exercise interventions for upper-limb dysfunction due to breast cancer treatment. *Cochrane Database of Systematic Reviews* 2010, Issue 6. Art. No.: CD005211. DOI: 10.1002/14651858.CD005211.pub2.

Velthuis MJ, Agasi-Idenburg SC, Aufdemkampe G & Wittink HM. The Effect of Physical Exercise on Cancer-related Fatigue during Cancer Treatment: a Meta-analysis of Randomised Controlled Trials. *Clinical Oncology.* 2010; 22(3) 208–221. DOI: 10.1016/j.clon.2009.12.005.

Kim CJ, Kang DH & Park JW. A Meta-Analysis of Aerobic Exercise Interventions for Women With Breast Cancer. *Western Journal of Nursing Research.* 2009; 31(4): 437-461.

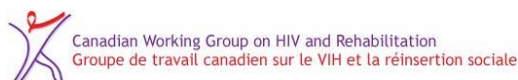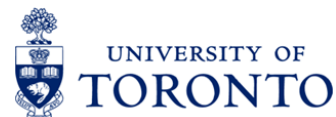

1  
2  
3  
4  
5  
6  
7  
8  
9  
10  
11  
12  
13  
14  
15  
16  
17  
18  
19  
20  
21  
22  
23  
24  
25  
26  
27  
28  
29  
30  
31  
32  
33  
34  
35  
36  
37  
38  
39  
40  
41  
42  
43  
44  
45  
46  
47  
48  
49  
50  
51  
52  
53  
54  
55  
56  
57  
58  
59  
60

Cramp F & Byron-Daniel J. Exercise for the management of cancer-related fatigue in adults. Cochrane Database of Systematic Reviews 2012, Issue 11. Art. No.: CD006145. DOI: 10.1002/14651858.CD006145.pub3. Summary available from: <http://summaries.cochrane.org/CD006145/the-effect-of-exercise-on-fatigue-associated-with-cancer>

Brockow T, Markes M & Resch KL. Exercise for women receiving adjuvant therapy for breast cancer. Cochrane Database of Systematic Reviews 2006, Issue 4. Art. No.: CD005001. DOI: 10.1002/14651858.CD005001.pub2.

Ingram C, Courneya KS & Kingston D. The Effects of Exercise on Body Weight and Composition in Breast Cancer Survivors: An Integrative Systematic Review. *Oncology Nursing Forum*. 2006; 33(5): 937.

McNeely ML, Campbell K, Ospina M, Rowe BH, Dabbs K, Klassen TP, Mackey J & Courneya K. Exercise interventions for upper-limb dysfunction due to breast cancer treatment. *CMAJ*. 2006; 175(1):34-41. DOI:10.1503/cmaj.051073.

For peer review only

Category  
 E

Stroke

The prevalence of stroke among adults living with HIV between 2000 and 2006 is 11%; these rates are much higher among older women living with HIV (14%) compared to older men living with HIV (10%) (3).

The incidence of stroke among adults living with HIV has increased with the introduction of combination antiretroviral therapy; adults living with HIV are more at risk of stroke with increased age and length of time using antiretroviral therapy (26).

The incidence rate for ischemic stroke among adults living with HIV has increased to 0.2% in 2006, compared to 0.1% in 1997 (26-28). HIV/AIDS also increases the risk of hemorrhagic stroke, but the risks are higher among the younger adults living with HIV compared to older adults living with HIV (27).

**Disability Experienced by Adults with Stroke**

Stroke can result in hospitalization and increased risk for developing opportunistic infections (27, 28). The occurrence of stroke may result in a combination of physical, cognitive, speech and mental health impairments, activity limitations, and social participation restrictions (29).

Injuries that can be sustained from the occurrence of a stroke include pressure sores, and pain in shoulder and other areas. Injuries from falls can also occur (29). Psychological challenges faced as a result of stroke include depression, anxiety, emotionalism, and confusion (29).

We present eight recommendations for rehabilitation, cognitive rehabilitation, exercise and therapeutic modality interventions for adults with living with HIV and stroke.

**E.1 – Cognitive Rehabilitation**

**Recommendation 29a:** Inconclusive or insufficient evidence exists to derive recommendations for **cognitive rehabilitation** interventions for older adults with HIV and stroke. While cognitive rehabilitation does not appear harmful, weak evidence exists to support the use of cognitive-specific interventions to improve spatial neglect, disability, memory, and functional status for older adults who experience stroke.

**Recommendation 29b:** Rehabilitation professionals should implement specific task oriented training with older adults living with HIV and stroke as this approach is key to retraining skill specific tasks related to function.

**Explanatory Notes:** Despite the lack of strong evidence supporting cognitive rehabilitation in stroke, neurocognitive impairments are a major concern for the aging people living with HIV/AIDS (PLHIV) population. There may be specific considerations for older adults with HIV with pre-existing neurocognitive impairments and stroke. From a rehabilitation perspective it will be important to obtain a clear baseline to determine what neurocognitive issues are specific to stroke.

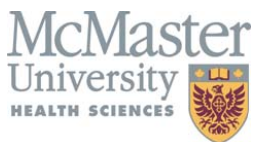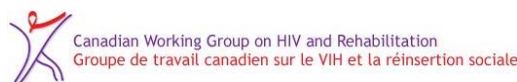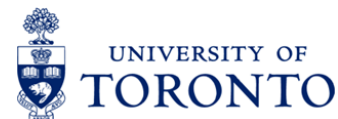

1  
2 **Level of Evidence:** Moderate (systematic review but not Cochrane) to High (Cochrane review)

3  
4 **Age of Participants in Research Evidence:** Majority of mean age >50 years [#730 younger participants]

5  
6  
7 **References**

8 Hoffmann T, Bennett S, Koh CL & McKenna KT. Occupational therapy for cognitive impairment in stroke  
9 patients. *Cochrane Database of Systematic Reviews* 2010, Issue 9. Art. No.: CD006430. DOI:  
10 10.1002/14651858.CD006430.pub2.

11  
12 Bowen A & Lincoln N. Cognitive rehabilitation for spatial neglect following stroke. *Cochrane Database of*  
13 *Systematic Reviews* 2007, Issue 2. Art. No.: CD003586. DOI: 10.1002/14651858.CD003586.pub2.

14  
15 dasNair R & Lincoln N. Cognitive rehabilitation for memory deficits following stroke. *Cochrane Database of*  
16 *Systematic Reviews* 2007, Issue 3. Art. No.: CD002293. DOI: 10.1002/14651858.CD002293.pub2.

17  
18  
19 Park NW & Ingles JL. Effectiveness of attention rehabilitation after an acquired brain injury: a meta-analysis.  
20 *Neuropsychology*. 2001; 15(2): 199-210.



**E.2 – Rehabilitation**

**Recommendation 30: Stroke rehabilitation for older adults with HIV should be multi-disciplinary** including occupational therapy, physical therapy, and speech-language pathology to improve the ability to undertake personal activities of daily living and reduce risk of deterioration in ability. Stroke rehabilitation may include the following components: therapeutic exercise, task-oriented training, gait-oriented training, balance training, strength training, wheelchair mobility, home modification, cognitive adaptation, and treatment of shoulder subluxation for those who experience a **sub-acute or post-acute stroke (within 1 year)**.

Specifically:

**Recommendation 30a: Repetitive, task-related training** in rehabilitation for lower limbs should be recommended to enhance functional activity, walking distance; walking speed; sit-to-stand, activities of daily living; measures of walking ability, and global motor function.

**Recommendation 30b: Very early mobilization** should be promoted for older adults with HIV to enhance earlier independent mobility.

**Recommendation 30c: Passive sensory training** (cutaneous electrical stimulation) may be recommended to improve hand function and dexterity in older adults living with HIV with stroke whereas evidence supporting improvements in spasticity and muscle strength is less convincing. Caution should be taken for this intervention for individuals with peripheral neuropathy due to altered sensation.

**Recommendation 30d: Task-oriented circuit class training** should be recommended to enhance gait and gait-related activities as evidence demonstrates this intervention is effective in improving walking ability, walking speed and balance however rehabilitation professionals should be aware of the potential for falls during any rehabilitation sessions and should put strategies in place to prevent against falls.

**Recommendation 30e: Strength training** should be recommended post stroke as it is not associated with increases in spasticity.

**Level of Evidence:** High (CPGs and Cochrane systematic reviews) and Moderate (systematic review but not Cochrane) to High (Cochrane review)

**Age of Participants in Research Evidence:** Majority of studies mean age > 50 years [2 studies had no age info] and Studies with participant >18 years

**References**

English C & Hillier S. Circuit class therapy for improving mobility after stroke: a systematic review. J Rehabil Med. 2011; 43: 565–571.

Craig LE, Bernhardt J, Langhorne P & Wu O. Early mobilization after stroke: an example of an individual patient data meta-analysis of a complex intervention. Stroke. 2010; 41(11): 2632-2636.

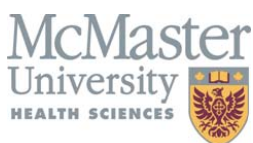



1  
2 French B, Thomas L, Leathley M, Sutton C, McAdam J, Forster A, Langhorne P, Price C, Walker A & Watkins  
3 C. Does repetitive task training improve functional activity after stroke? A Cochrane systematic review and  
4 meta-analysis. *J Rehabil Med*. 2010; 42: 9–14.

5  
6  
7 Schabrun SM & Hillier S. Evidence for the retraining of sensation after stroke: a systematic review. *Clinical  
8 Rehabilitation*. 2009; 23: 27–39.

9  
10 Wevers L, van de Port I, Vermue M, Mead G & Kwakkel G. Effects of Task-Oriented Circuit Class Training on  
11 Walking Competency After Stroke: A Systematic Review. *Stroke*. 2009; 40:2450-2459. Originally published  
12 online May 21, 2009 doi: 10.1161/STROKEAHA.108.541946.

13  
14 Aziz NA, Leonardi-Bee J, Phillips MF, Gladman J, Legg LA & Walker M. Therapy-based rehabilitation services  
15 for patients living at home more than one year after stroke. *Cochrane Database of Systematic Reviews*  
16 2008, Issue 2. Art. No.: CD005952. DOI: 10.1002/14651858.CD005952.pub2.

17  
18  
19 Langhorne P & Widen-Holmqvist L. Early supported discharge after stroke. *Journal of Rehabilitation  
20 Medicine*. 2007; 39: 103-108. DOI: 10.2340/16501977-0042.

21  
22  
23 van de Port IG, Wood-Dauphinee S, Lindeman E & Kwakkel G. Effects of exercise training programs on  
24 walking competency after stroke: a systematic review. *Am J Phys Med Rehabil*. 2007; 86(11): 935–951.

25  
26  
27 Ottawa Panel. Ottawa Panel Evidence-Based Clinical Practice Guidelines for Post-Stroke Rehabilitation. *Top  
28 Stroke Rehabil*. 2006; 13(2):1–269.

29  
30 Moseley AM, Stark A, Cameron ID & Pollock A. Treadmill training and body weight support for walking after  
31 stroke. *Cochrane Database of Systematic Reviews* 2005, Issue 4. Art. No.: CD002840. DOI:  
32 10.1002/14651858.CD002840.pub2.

33  
34 Kwakkel G, van Peppen R, Wagenaar RC, Wood Dauphinee S, Richards C, Ashburn A, Miller K, Lincoln N,  
35 Partridge C, Wellwood I & Langhorne P. Effects of augmented exercise therapy time after stroke: A meta-  
36 analysis. *Stroke*. 2004; 35(11):2529-2539. Originally published online October 7, 2004. DOI:  
37 10.1161/01.STR.0000143153.76460.7d.

38  
39  
40 Legg L, Langhorne P & Outpatient Service Trialists. Rehabilitation therapy services for stroke patients living  
41 at home: systematic review of randomised trials. *Lancet*. 2004; 363(9406): 352-356.

42  
43  
44 Van Peppen RP, Kwakkel G, Wood-Dauphinee S, Hendriks HJ, Van der Wees PJ & Dekker J. The impact of  
45 physical therapy on functional outcomes after stroke: what's the evidence? *Clinical Rehabilitation*. 2004;  
46 18(8): 833-862.

### 47 48 49 **E.3 - Rehabilitation (Occupational Therapy)**

50  
51 **Recommendation 31: Occupational therapy should be recommended** as a component of  
52 rehabilitation for older adults living with HIV with stroke as interventions targeted towards  
53 personal activities of daily living may increase activities of daily living (ADLs) and reduce  
54 mortality, deterioration and dependency.

**Level of Evidence:** Moderate (meta-analysis and systematic reviews but not Cochrane)

**Age of Participants in Research Evidence:** Mean age 71 years

**References**

Legg L, Drummond A, Leonardi-Bee J, Gladman JRF, Corr S, Donkervoort M, Edmans J, Gilbertson L, Jongbloed L, Logan P, Sackley C, Walker M & Langhorne P. Occupational therapy for patients with problems in personal activities of daily living after stroke: systematic review of randomised trials. *BMJ*. 2007; 335(7626): 922.

Walker MF, Leonardi-Bee J, Bath P, Langhorne P, Dewey M, Corr S, Drummond A, Gilbertson L, Gladman JR, Jongbloed L, Logan P & Parker C. Individual patient data meta-analysis of randomized controlled trials of community occupational therapy for stroke patients. *Stroke*. 2004; 35(9): 2226-2232. Available from: <http://stroke.ahajournals.org/content/35/9/2226>.

**E.4- Rehabilitation (Physical Therapy)**

**Recommendation 32:** Physiotherapy comprised of a combination of interventions should be recommended for the recovery of postural control and lower limb function for older adults living with HIV following stroke.

**Level of Evidence:** Moderate (systematic review but not Cochrane)

**Age of Participants in Research Evidence:** Studies with participant >18 years

**References**

Pollock A, Baer G, Langhorne P & Pomeroy V. Physiotherapy treatment approaches for the recovery of postural control and lower limb function following stroke: a systematic review. *Clinical Rehabilitation*. 2007; 21(5): 395-410.

**E.5 - Rehabilitation (Electromechanical and robotic gait training)**

**Recommendation 33:** Electromechanical-assisted gait training in combination with physiotherapy may be recommended for older adults living with HIV with stroke (particularly those within 3 months post stroke) as this intervention is associated with a higher likelihood to achieve independent walking than gait training alone.

**Level of Evidence:** High (Cochrane systematic review)

**Age of Participants in Research Evidence:** Mean age 61 years

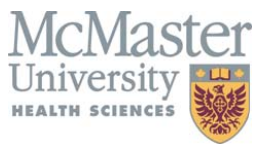

## Reference

Mehrholz J, Werner C, Kugler J & Pohl M. Electromechanical-assisted training for walking after stroke. *Cochrane Database of Systematic Reviews* 2007, Issue 4. Art. No.: CD006185. DOI: 10.1002/14651858.CD006185.pub2.

## E.6 – Exercise

**Recommendation 34: Combined aerobic and resistive exercise** should be a component of stroke rehabilitation for older adults living with HIV with stroke who are medically stable at any stage of motor recovery. Higher doses of exercise may be associated with better motor recovery. Specifically, **cardiorespiratory training** should be a component of exercise as evidence suggests speed, tolerance and independence during walking are improved. In addition, **strength training** may be a component of exercise as this can improve muscle strength in stroke patients and will not necessarily increase spasticity.

**Level of Evidence:** High (combination of systematic reviews and Cochrane reviews)

**Age of Participants in Research Evidence:** Majority of studies mean age >50 years

## References

Cooke E, Mares K, Clark A, Tallis RC & Pomeroy VM. The effects of increased dose of exercise-based therapies to enhance motor recovery after stroke: a systematic review and meta-analysis. *BMC Medicine*. 2010; 8:60. Available from: <http://www.biomedcentral.com/1741-7015/8/60>.

Saunders DH, Greig CA, Mead GE & Young A. Physical fitness training for stroke patients. *Cochrane Database of Systematic Reviews* 2009, Issue 4. Art. No.:CD003316. DOI:10.1002/14651858.CD003316.pub3.

States RA, Pappas E & Salem Y. Overground physical therapy gait training for chronic stroke patients with mobility deficits. *Cochrane Database of Systematic Reviews* 2009, Issue 3. Art. No.: CD006075. DOI: 10.1002/14651858.CD006075.pub2.

Ada L, Dorsch S & Canning CG. Strengthening interventions increase strength and improve activity after stroke: a systematic review. *Australian Journal of Physiotherapy*. 2006; 52(4): 241-248.

Pang MYC, Eng JJ, Dawson AS & Gylfadottir S. The use of aerobic exercise training in improving aerobic capacity in individuals with stroke: a meta-analysis. *Clinical Rehabilitation*. 2006; 20(2): 97-111.

Meek C, Pollock A, Potter J & Langhorne P. A systematic review of exercise trials post stroke. *Clinical Rehabilitation*. 2003; 17(1): 6-13.

**E.7 - Electrotherapeutic Modalities**

**Recommendation 35: Electrotherapeutic modalities** in isolation are not recommended for older adults living with HIV with stroke over conventional rehabilitation interventions strategies. Very weak to no evidence exists to support the use of electrotherapeutic modalities (functional electrical stimulation, biofeedback, visual feedback therapy) over conventional physical therapy interventions alone for muscle strength recovery, upper limb recovery or balance post stroke.

**Explanatory Notes:** Impairment-focused interventions alone such as biofeedback, neuromuscular or transcutaneous nerve stimulation fail to generalize to functional improvements and are not recommended in isolation for older adults with HIV and stroke. Particular caution should be taken by rehabilitation professionals working with older adults with HIV who may not have complete intact sensation as they may be at risk for injury with intervention such electronic stimulation, electrotherapeutic modalities.

**Level of Evidence:** Moderate (systematic reviews and meta-analyses but not Cochrane)

**Age of Participants in Research Evidence:** Mean age >50 years and Studies with participant >18 years

**References**

Van Peppen RPS, Kortsmid M, Lindeman E & Kwakkel G. Effects of visual feedback therapy on postural control in bilateral standing after stroke: a systematic review. *Journal of Rehabilitation Medicine*. 2006; 38(1): 3-9.

Kottink AI, Oostendorp LJ, Buurke JH, Nene AV, Hermens HJ & IJzerman MJ. The orthotic effect of functional electrical stimulation on the improvement of walking in stroke patients with a dropped foot: a systematic review. *Artificial Organs*. 2004; 28(6): 577-586.

Van Peppen RP, Kwakkel G, Wood-Dauphinee S, Hendriks HJ, Van der Wees PJ & Dekker J. The impact of physical therapy on functional outcomes after stroke: what's the evidence? *Clinical Rehabilitation*. 2004; 18 (8): 833-862.

Glanz M, Klawansky S, Stason W, Berkey C & Chalmers TC. Functional electrostimulation in poststroke rehabilitation: a meta-analysis of the randomized controlled trials. *Archives of Physical Medicine & Rehabilitation*. 1996; 77(6): 549-553.

Moreland J & Thomson MA. Efficacy of electromyographic biofeedback compared with conventional physical therapy for upper-extremity function in patients following stroke: a research overview and meta-analysis. *Physical Therapy*. 1994; 74(6): 534-54.

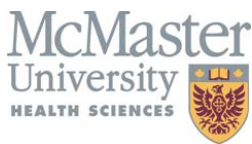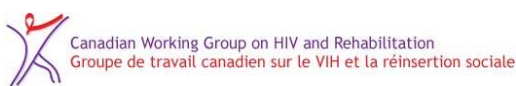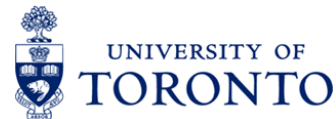

## Category F

### Cardiovascular Disease (CVD)

HIV disease has been associated with an increased risk of cardiovascular complications (30). Dyslipidemia (abnormal amounts of lipid in the blood), insulin resistance, and central obesity coupled with an aging HIV-positive population have led to an increased incidence of cardiovascular events for adults with HIV (31).

The prevalence of hypertension among adults living with HIV ranged from 41% to 54% between 2000 and 2007 with rates higher for women compared to men in the same population (3, 16).

The prevalence of heart disease among adults living with HIV is 15%. Rates of heart disease in women (23%) is more than 2 times the rate of men living with HIV (12%) (3, 16).

The prevalence of coronary heart disease among adults living with HIV ranges from 7–8% (32).

The prevalence of asymptomatic ischemic heart disease among adults ages 50-59 years living with HIV is 13%, and increases to 17% for adults 60 years or older (33).

The prevalence of asymptomatic peripheral arterial disease (PAD) is low, but identified only in adults living with HIV with high cardiovascular risk (31).

#### Disability Experienced by Adults with Cardiovascular Disease (CVD)

Cardiovascular risks include abnormally elevated levels of lipids and/or lipoproteins in the blood (hyperlipidaemia), fat redistribution syndrome, insulin resistance, diabetes mellitus, hypertension and increased hospitalization (16, 30, 33, 34).

Cardiovascular disease can also lead to events such as a myocardial infarction resulting in a range of impairments, activity limitations and participation restrictions for adults with HIV.

We present six recommendations for rehabilitation and exercise interventions for older adults with HIV and cardiovascular disease, myocardial infarction, heart disease, or heart failure.

#### Fi) Cardiovascular Disease (CVD)

##### Fi.1 – Cardiac Rehabilitation

**Recommendation 36: Cardiac rehabilitation** in the form of **home-based or centre-based care** may be recommended because these appear equally effective in improving the clinical & health related quality of life outcomes for older adults with HIV with low risk **cardiovascular disease**. The choice of home versus centre-based care should be reflective of the individual preference of the patient as this may impact the uptake of rehabilitation.



**Level of Evidence:** High (Cochrane reviews) and Moderate (systematic reviews and meta-analyses but not Cochrane)

**Age of Participants in Research Evidence:** Majority of mean age >50 years and Mean age >55 years

**References**

Davies EJ, Moxham T, Rees K, Singh S, Coats AJS, Ebrahim S, Lough F & Taylor RS. Exercise based rehabilitation for heart failure. *Cochrane Database of Systematic Reviews* 2010, Issue 4. Art. No.: CD003331. DOI: 10.1002/14651858.CD003331.pub3.

Taylor RS, Dalal H, Jolly K, Moxham T & Zawada A. Home-based versus centre-based cardiac rehabilitation. *Cochrane Database of Systematic Reviews* 2010, Issue 1. Art. No.: CD007130. DOI: 10.1002/14651858.CD007130.pub2.

Clark AM, Hartling L, Vandermeer B & McAlister FA. Meta-analysis: Secondary prevention programs for patients with coronary artery. *Annals of Internal Medicine*. 2005; 143(9): 659-672. DOI: 10.7326/0003-4819-143-9-200511010-00010.

Herkner H, Thoennissen J, Nikfardjam M, Koreny M, Laggner AN & Mullner M. Short versus prolonged bed rest after uncomplicated acute myocardial infarction: a systematic review and meta-analysis. *Journal of Clinical Epidemiology*. 2003; 56(8): 775-781.

Jolliffe J, Rees K, Taylor RRS, Thompson DR, Oldridge N, & Ebrahim S. Exercise-based rehabilitation for coronary heart disease. *Cochrane Database of Systematic Reviews* 2001, Issue 1. Art. No.: CD001800. DOI: 10.1002/14651858.CD001800.

Mullen PD, Mains DA & Velez R. A meta-analysis of controlled trials of cardiac patient education. *Patient Education & Counseling*. 1992; 19(2): 143-162. DOI: 10.1016/0738-3991(92)90194-N.

**Recommendation 37: Cardiac rehabilitation** for older adults with HIV should include reinforcement, feedback, offer opportunity for individualization, facilitate behaviour change through skills and resources and be relevant to patients’ needs and abilities. Specifically, **motivational communication** such as formal cardiac rehabilitation program referral, reminder letters, phone calls and home visits may be recommended for increasing uptake and adherence of cardiac rehabilitation among older adults living with HIV and cardiovascular disease.

**Level of Evidence:** High (Cochrane reviews) and Moderate (systematic reviews and meta-analyses but not Cochrane)

**Age of Participants in Research Evidence:** Majority of mean age >50 years and Mean age >55 years

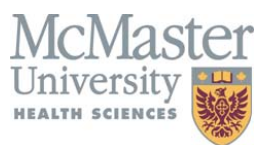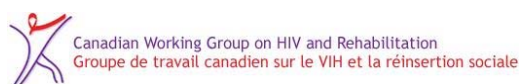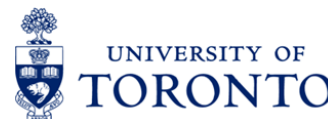

**References**

Davies EJ, Moxham T, Rees K, Singh S, Coats AJS, Ebrahim S, Lough F & Taylor RS. Exercise based rehabilitation for heart failure. *Cochrane Database of Systematic Reviews* 2010, Issue 4. Art. No.: CD003331. DOI: 10.1002/14651858.CD003331.pub3.

Taylor RS, Dalal H, Jolly K, Moxham T & Zawada A. Home-based versus centre-based cardiac rehabilitation. *Cochrane Database of Systematic Reviews* 2010, Issue 1. Art. No.: CD007130. DOI: 10.1002/14651858.CD007130.pub2.

Clark AM, Hartling L, Vandermeer B & McAlister FA. Meta-analysis: Secondary prevention programs for patients with coronary artery. *Annals of Internal Medicine*. 2005; 143(9): 659-672. DOI: 10.7326/0003-4819-143-9-200511010-00010.

Herkner H, Thoennissen J, Nikfardjam M, Koreny M, Laggner AN & Mullner M. Short versus prolonged bed rest after uncomplicated acute myocardial infarction: a systematic review and meta-analysis. *Journal of Clinical Epidemiology*. 2003; 56(8): 775-781.

Jolliffe J, Rees K, Taylor RRS, Thompson DR, Oldridge N & Ebrahim S. Exercise-based rehabilitation for coronary heart disease. *Cochrane Database of Systematic Reviews* 2001, Issue 1. Art. No.: CD001800. DOI: 10.1002/14651858.CD001800.

Mullen, PD, Mains DA & Velez R. A meta-analysis of controlled trials of cardiac patient education. *Patient Education & Counseling*. 1992; 19(2): 143-162. DOI: 10.1016/0738-3991(92)90194-N.

**Fii) CVD - Myocardial Infarction****Fii.1 – Cardiac Rehabilitation**

**Recommendation 38a: Exercise-based cardiac rehabilitation** should be recommended for older adults with HIV who have undergone a myocardial infarction (MI) (otherwise known as a heart attack) (or at risk of an MI) given evidence suggests exercise based cardiac rehabilitation is effective in reducing cardiac deaths. The ideal frequency, intensity, time and type of exercise to maximize benefits are unclear.

**Recommendation 38b: Early mobilization and rehabilitation** and specifically, **secondary and tertiary prevention programs** (including counseling, education, and exercise) should be recommended to older adults living with HIV who experience an MI as these have the potential to reduce subsequent MI and mortality and improve processes of care, risk factor profiles and functional status and quality of life.

**Level of Evidence:** High (Cochrane reviews) and Moderate (systematic reviews and meta-analyses but not Cochrane)

**Age of Participants in Research Evidence:** Majority of mean age >50 years and Mean age >55 years



**References**

Davies EJ, Moxham T, Rees K, Singh S, Coats AJS, Ebrahim S, Lough F & Taylor RS. Exercise based rehabilitation for heart failure. *Cochrane Database of Systematic Reviews* 2010, Issue 4. Art. No.: CD003331. DOI: 10.1002/14651858.CD003331.pub3.

Taylor RS, Dalal H, Jolly K, Moxham T & Zawada A. Home-based versus centre-based cardiac rehabilitation. *Cochrane Database of Systematic Reviews* 2010, Issue 1. Art. No.: CD007130. DOI: 10.1002/14651858.CD007130.pub2.

Clark AM, Hartling L, Vandermeer B & McAlister FA. Meta-analysis: Secondary prevention programs for patients with coronary artery. *Annals of Internal Medicine*. 2005; 143(9): 659-672. DOI: 10.7326/0003-4819-143-9-200511010-00010.

Herkner H, Thoennissen J, Nikfardjam M, Koreny M, Laggner AN & Mullner M. Short versus prolonged bed rest after uncomplicated acute myocardial infarction: a systematic review and meta-analysis. *Journal of Clinical Epidemiology*. 2003; 56(8): 775-781.

Jolliffe J, Rees K, Taylor RRS, Thompson DR, Oldridge N & Ebrahim S. Exercise-based rehabilitation for coronary heart disease. *Cochrane Database of Systematic Reviews* 2001, Issue 1. Art. No.: CD001800. DOI: 10.1002/14651858.CD001800.

Mullen PD, Mains DA & Velez R. A meta-analysis of controlled trials of cardiac patient education. *Patient Education & Counseling*. 1992; 19(2): 143-162. DOI: 10.1016/0738-3991(92)90194-N.

**Fiii) CVD - Coronary Artery Disease and Coronary Heart Disease**

**Fiii.1 – Exercise**

**Recommendation 39: Moderate intensity exercise (and potentially progressive resistive exercise) should be recommended** for older adults with HIV with **cardiovascular disease** who are medically stable to reduce high blood pressure and potentially mitigate the effect of coronary heart disease. Exercise may be associated with improved cardiovascular health and well-being as a result of enhanced self-efficacy. More research is required to determine the ideal frequency and duration of exercise that should be recommended to see psychological improvement. **High intensity aerobic exercise** may increase High Density Lipoprotein Cholesterol (HDL-C) levels, while **combined aerobic and resistance exercise** may lower Low Density Lipoprotein Cholesterol (LDL-C) levels and should be recommended for older adults with HIV to improve their cardiovascular health.

**Level of Evidence:** Moderate (systematic reviews but not Cochrane)

**Age of Participants in Research Evidence:** Two of the studies had mean age >50 years whereas other two studies participant ranged 18-80 years

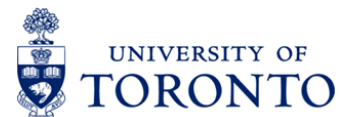

## References

Valkeinen H, Aaltonen S & Kujala UM. Effects of exercise training on oxygen uptake in coronary heart disease: a systematic review and meta-analysis. *Scandinavian Journal of Medicine & Science in Sports*. 2010; 20(4): 545-555. DOI: 10.1111/j.1600-0838.2010.01133.x.

Tambalis K, Panagiotakos DB, Kavouras SA & Sidossis LS. Responses of blood lipids to aerobic, resistance, and combined aerobic with resistance exercise training: A systematic review of current evidence. *ANGIOLOGY* 2009 60: 614. Originally published online 30 October 2008. Available from: <http://ang.sagepub.com/content/60/5/614>.

Netz Y, Wu M-J, Becker BJ, & Tenebaum G. Physical activity and psychological well-being in advanced age: A meta-analysis of intervention studies. *Psychology and Aging*. 2005; 20(2): 272–284. DOI: 10.1037/0882-7974.20.2.272.

Halbert JA, Silagy CA, Finucane P, Withers RT, Hamdorf PA & Andrews GR. The effectiveness of exercise training in lowering blood pressure: a meta-analysis of randomised controlled trials of 4 weeks or longer. *Journal of Human Hypertension*. 1997; 11(10): 641-649.

## Fiv) CVD – Heart Failure

### Fiv.1 – Exercise

**Recommendation 40: Home-based moderate intensity exercise (and potentially progressive resistive exercise) as well as supervised and hospital-based exercise programs** appear to be safe and should be recommended for older adults with HIV and heart failure who are medically stable for potential improvements in cardiac function, exercise capacity (including peak oxygen consumption), physical function, mortality and quality of life and potentially a reduction in hospital admissions. Optimal session frequency, session duration, exercise intensity, program duration is unclear.

**Level of Evidence:** High (combination of Cochrane systematic review and other systematic reviews) and Moderate (systematic review but not Cochrane)

**Age of Participants in Research Evidence:** Majority of studies mean age >50 years and Age range 19-83 years (only 6/31 studies had participant >80 years)

## References

Davies P, Taylor F, Beswick A, Wise F, Moxham T, Rees K & Ebrahim S. Promoting patient uptake and adherence in cardiac rehabilitation. *Cochrane Database of Systematic Reviews* 2010, Issue 7.Art.No.:CD007131. DOI: 10.1002/14651858.CD007131.pub2.

Chien C-L, Lee CM Wu Y-W, Chen T-A & Wu Y-T. Home-based exercise increases exercise capacity but not quality of life in people with chronic heart failure: a systematic review. *Australian Journal of Physiotherapy*. 2008; 54(2): 87-93.

1  
2  
3 Haykowsky M, Clark AM, Liang Y, Pechter D, Jones LW & McAlister FA. A meta-analysis of the effect of  
4 exercise training on left ventricular remodeling in heart failure patients: The benefit depends on the type of  
5 training performed. ACC Cardiosource Review Journal. 2007; 16(10): 33-37.  
6

7  
8 Smart N & Marwick TH. Exercise training for patients with heart failure: a systematic review of factors that  
9 improve mortality and morbidity. American Journal of Medicine. 2004; 116(10): 693-706.  
10

11 Lloyd-Williams F, Mair FS & Leitner M. Exercise training and heart failure: a systematic review of current  
12 evidence. British Journal of General Practice. 2002; 52(474): 47-55.  
13

14 Halbert JA, Silagy CA, Finucane P, Withers RT & Hamdorf PA. Exercise training and blood lipids in  
15 hyperlipidemic and normolipidemic adults: a meta-analysis of randomized, controlled trials. European  
16 Journal of Clinical Nutrition. 1999; 53(7): 514-522.  
17  
18

19  
20  
21 **Recommendation 41: Aerobic exercise (and possibly resistive exercise)** at least 3 times  
22 per week may be recommended to older adults living with HIV and **hyperlipidemia** for the  
23 potential to improve blood lipids. Clinical importance of the changes is unclear.  
24

25 **Level of Evidence:** Moderate (systematic review but not Cochrane)  
26

27 **Age of Participants in Research Evidence:** Age range 19-83 years (only 6/31 studies had participant >80  
28 years  
29

30  
31 **Reference**

32 Halbert JA, Silagy CA, Finucane P, Withers RT & Hamdorf PA. Exercise training and blood lipids in  
33 hyperlipidemic and normolipidemic adults: a meta-analysis of randomized, controlled trials. European  
34 Journal of Clinical Nutrition. 1999; 53(7): 514-522.  
35  
36  
37  
38  
39  
40  
41  
42  
43  
44  
45  
46  
47  
48  
49  
50  
51  
52  
53  
54  
55

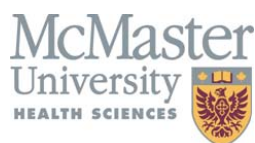

## Category G

### Mental Health Challenges

Although older adults living with HIV report more depressive symptoms and higher levels of life-stressor burden than their younger counterparts, older adults reported advanced age provided them with more adaptive coping and problem-solving skills. They also reported feeling less threatened by illness and disability compared to younger persons with HIV (16, 35, 36).

Depression in adults living with HIV is associated with neuropsychological impairment. Approximately 25% of older adults living with HIV are diagnosed with depression (36-38). The prevalence of psychological disorders (such as depression) among adults with HIV is 17%, and are more prevalent among older women living with HIV (23%) compared to older men living with HIV (14%) (3).

#### Disability Experienced by Adults with Mental Health Challenges

Challenges experienced by adults living with HIV and mental health issues include HIV-associated stigma, increased loneliness, decreased cognitive functioning, reduced level of energy, employment worries and reduced access to health care and social services due to AIDS-related stigma (36, 39, 40).

We present four recommendations for models of care, exercise, psychotherapy, and housing interventions for older adults living with HIV and varying forms of mental health issues.

#### Gi) Mental Health Challenges (Older adults with mental health issues)

##### Gi.1 – Models of Care

**Recommendation 42:** Inconclusive or insufficient evidence exists to support a recommendation for a specific model of mental health care (**acute psychogeriatric care over acute psychiatric units versus other mental health services**) for older adults with HIV living with **mental health issues**. More research is needed before recommending one model of care over another.

**Level of Evidence:** Moderate (systematic review but not Cochrane)

**Age of Participants in Research Evidence:** All participant >60 years

#### Reference

Draper B & Low L-F. What is the effectiveness of acute hospital treatment of older people with mental disorders? *International Psychogeriatrics*. 2005; 17(4): 539-555.

## Gii) Mental Health Challenges (anxiety)

### Gii.1 – Exercise

**Recommendation 43:** Exercise appears safe and should be recommended (approximately 30 minutes per session) to older adults with HIV living with other chronic conditions illnesses such as cardiovascular disease (CVD), cancer, chronic pain, fibromyalgia as a way to reduce symptoms of **anxiety**.

**Level of Evidence:** Moderate (systematic review and meta-analysis but not Cochrane)

**Age of Participants in Research Evidence:** Mean age 50 years

#### Reference

Herring MP, O'Connor PJ & Dishman RK. The effect of exercise training on anxiety symptoms among patients: a systematic review. *Archives of Internal Medicine*. 2010; 170(4): 321-331.

## Giii) Mental Health Challenges (Depression)

### Giii.1 – Psychotherapy

**Recommendation 44:** Inconclusive or insufficient evidence exists to support the use of **cognitive behavioural therapy** with older adults with HIV and **depression**.

**Explanatory Notes:** Despite inconclusive evidence, clinicians and PLHIV reported using this intervention in their practice with adults with HIV who are depressed.

**Level of Evidence:** High (Cochrane review)

**Age of Participants in Research Evidence:** All participants >55 years

#### Reference

Wilson K, Mottram PG & Vassilas C. Psychotherapeutic treatments for older depressed people. *Cochrane Database of Systematic Reviews* 2008, Issue 1. Art. No.: CD004853. DOI: 10.1002/14651858.CD004853.pub2.

## Giv) Mental Health Challenges (severe mental illness)

### Giv.1 – Housing Models

**Recommendation 45:** Supporting older adults living with HIV in securing **safe and stable housing** should be an important component of the rehabilitation process for older adults with HIV with **severe mental illness** given the positive impact of stable housing for this target population.

1  
2  
3  
4  
5  
6  
7  
8  
9  
10  
11  
12  
13  
14  
15  
16  
17  
18  
19  
20  
21  
22  
23  
24  
25  
26  
27  
28  
29  
30  
31  
32  
33  
34  
35  
36  
37  
38  
39  
40  
41  
42  
43  
44  
45  
46  
47  
48  
49  
50  
51  
52  
53  
54  
55  
56  
57  
58  
59  
60

**Level of Evidence:** Moderate (meta-analysis but not Cochrane)

**Age of Participants in Research Evidence:** Younger adults (mean age 39 years)

**Reference**

Leff HS, Chow CM, Pepin R, Conley J, Allen IE & Seaman CA. Does one size fit all? What we can and can't learn from a meta-analysis of housing models for persons with mental illness. *Psychiatric Services*. 2009; 60(4): 473-482.

For peer review only

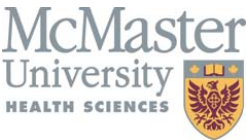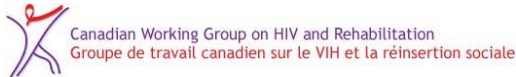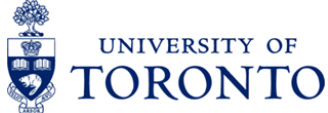



**Category**  
**H**

**Cognitive Impairments**

As many as 50% of adults living with HIV report cognitive difficulties, which can be associated with neuropsychological impairment (41, 42).

HIV-associated neurocognitive disorders (HAND) has been divided into three subclasses: asymptomatic neurocognitive impairments, mild neurocognitive disorder and HIV-associated dementia (HAD) (43). The prevalence of HIV-associated dementia (HAD) ranges from 8-15% for older men and women living with HIV (44, 45). Approximately 15% of adults living with HIV have Minor Cognitive Motor Disorder (MCMD) (46).

The process of neurological decline similar to Alzheimer’s disease and Parkinson’s disease (Parkinsonism related to HIV) has been reported in adults living with HIV (4, 47). The prevalence of Parkinsonism related to HIV is very low, ranging from 1% to 5% (47).

**Disability Experienced with Cognitive Impairments**

The challenges faced by adults living with HIV and cognitive disorders may include lower attention, motor speed, constructional abilities (impairment forming designs, objects, or materials with hands, under visual guidance), and verbal memory (41, 48-51).

The challenges specific to HAD include psychomotor slowing, apathy and motor disorders, similar to the bradykinesia and postural and gait abnormalities observed in late Parkinson’s disease (52).

We present three recommendations for cognitive rehabilitation and exercise interventions for older adults living with HIV with varying levels of neurocognitive impairments.

**Hi) Cognitive Impairment – Mild to Moderate Cognitive Impairment**

**Hi.1 – Cognitive Rehabilitation**

**Recommendation 46: Cognitive interventions** including cognitive training, cognitive stimulation, and cognitive rehabilitation should be recommended for older adults living with HIV with **mild cognitive impairment** because they are associated with significant improvements objective and subjective measures of memory, quality of life and mood / anxiety with benefits translated to improvements in daily functioning and mood. Specifically, **errorless learning** may be recommended for a potential positive effect on recall for older adults with HIV and cognitive impairment.

**Level of Evidence:** Moderate (systematic review but not Cochrane)

**Age of Participants in Research Evidence:** Younger and older adults with cognitive impairment

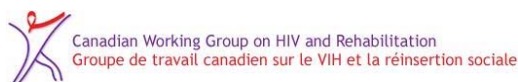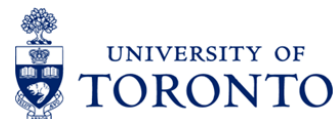



## References

Jean L, Bergeron ME, Thivierge S & Simard M. Cognitive intervention programs for individuals with mild cognitive impairment: Systematic review of the literature. *American Journal of Geriatric Psychiatry*. 2010; 18(4): 281-296.

Hauer K, Becker C, Lindemann U & Beyer N. Effectiveness of physical training on motor performance and fall prevention in cognitively impaired older persons: A systematic review. *American Journal of Physical Medicine and Rehabilitation*. 2006; 85(10): 847-857.

Kessels RPC & Haan EHF. Implicit Learning in Memory Rehabilitation: A Meta- Analysis on Errorless Learning and Vanishing Cues Methods', *Journal of Clinical and Experimental Neuropsychology*. 2003; 25(6), 805-814. DOI: 10.1076/jcen.25.6.805.16474.

## Hii) Cognitive Impairment

### Hii.1 – Exercise

**Recommendation 47:** A combination of aerobic and resistive (strengthening) exercise should be recommended for older adults living with HIV with cognitive impairment for improvements in fitness, physical function, cognitive function, and positive behaviour. Evidence suggests older adults with cognitive impairment may benefit from exercise as much as older adults with no cognitive impairment. Due to diversity in exercise programs, measures of cognition, and study populations in the evidence, the optional type of exercise program (content, intensity, frequency, and duration) is unclear.

**Recommendation 47a:** Specifically, aerobic exercise may be associated with improvements in neurocognitive function among older adults with HIV with cognitive impairment for attention and processing speed, executive function, and memory.

**Level of Evidence:** Moderate (systematic review and meta-analysis but not Cochrane)

**Age of Participants in Research Evidence:** Majority of studies included older adults >60 years

## References

Smith PJ, Blumenthal JA, Hoffman BM, Cooper H, Strauman TA, Welsh-Bohmer K, Browndyke JN & Sherwood A. Aerobic Exercise and Neurocognitive Performance: A Meta-Analytic Review of Randomized Controlled Trials. *Psychosomatic Medicine*. 2010; 72(3): 239–252. DOI: 10.1097/PSY.0b013e3181d14633.

Heyn PC, Johnson KE & Kramer AF. Endurance and strength training outcomes on cognitively impaired and cognitively intact older adults: a meta-analysis. *Journal of Nutrition, Health & Aging*. 2008; 12(6): 401-409.

van Uffelen JG, Chin A Paw MJ, Hopman-Rock M & van Mechelen W. The Effects of Exercise on Cognition in Older Adults With and Without Cognitive Decline: A Systematic Review. *Clin J Sport Med*. 2008; 18(6):486–500.

1  
2 Heyn P, Abreu BC & Ottenbacher KJ. The effects of exercise training on elderly persons with cognitive  
3 impairment and dementia: a meta-analysis. Archives of Physical Medicine & Rehabilitation. 2004; 85(10):  
4 1694-1704.  
5

### 6 7 **Hiii) Cognitive Impairment – Dementia**

#### 8 9 **Hiii.1 – Exercise**

10  
11 **Recommendation 48: Physical exercise** appears to be safe and may be recommended for  
12 older adults living with HIV and dementia however insufficient evidence exists to suggest  
13 benefits to cognition, function, behaviour, depression, and mortality.  
14  
15

16  
17 **Level of Evidence:** High (majority Cochrane systematic reviews)

18  
19 **Age of Participants in Research Evidence:** Older adults >65 years

#### 20 21 **References**

22 Forbes D, Forbes S, Morgan DG, Markle-Reid M, Wood J & Culum I. Physical activity programs for persons  
23 with dementia. *Cochrane Database of Systematic Reviews* 2008, Issue 3. Art. No.: CD006489. DOI:  
24 10.1002/14651858.CD006489.pub2.  
25

26  
27 Robinson L, Hutchings D, Dickinson HO, Corner L, Beyer F, Finch T, Hughes J, Vanoli A, Ballard C & Bond J.  
28 Effectiveness and acceptability of non-pharmacological interventions to reduce wandering in dementia: a  
29 systematic review. *International Journal of Geriatric Psychiatry*. 2007; 22(1): 9-22.  
30  
31  
32  
33  
34  
35  
36  
37  
38  
39  
40  
41  
42  
43  
44  
45  
46  
47  
48  
49  
50  
51  
52  
53  
54  
55

## Category

## I

**Chronic Obstructive Pulmonary Disease (COPD)**

Chronic Obstructive Pulmonary Disease (COPD) occurs in more than 5% of the general population of adults over 45 years of age (53). COPD includes chronic bronchitis, emphysema and asthma. The prevalence of COPD among older adults living with HIV ranges from 10 - 16%, and is more prevalent among women (21%) compared with men (14%) living with HIV (3, 54).

With an increased prevalence of smoking among people living with HIV compared to the general population, adults with HIV are at increased risk of developing COPD (3, 18).

**Disability Experienced by Adults with COPD**

Challenges faced by adults living with HIV and COPD may include small airways abnormalities and nonspecific airway hyper-responsiveness. Challenges may also include shortness of breath, decreased activity tolerance, and a productive cough (3, 54).

We present three recommendations for pulmonary rehabilitation, exercise, and inspiratory muscle training (IMT) interventions for older adults living with HIV and COPD.

**I.1 – Pulmonary Rehabilitation**

**Recommendation 49: Pulmonary rehabilitation** (including upper and lower extremity exercise, inspiratory muscle training and breathing exercises) for at least four weeks is safe and strongly recommended for older adults living with HIV who have chronic obstructive pulmonary disease (COPD) to reduce mortality, improve dyspnea, health-related quality of life, functional exercise capacity and reduce future hospital admissions. Individuals with more severe COPD may require longer rehabilitation programs of at least 6 months to demonstrate benefits.

**Level of Evidence:** High (combination of Cochrane systematic reviews and meta-analysis but not Cochrane)

**Age of Participants in Research Evidence:** Majority of participants >60 years

**References**

Puhan MA, Gimeno-Santos E, Scharplatz M, Troosters T, Walters EH & Steurer J. Pulmonary rehabilitation following exacerbations of chronic obstructive pulmonary disease. Cochrane Database of Systematic Reviews 2009, Issue 1. Art. No.: CD005305. DOI: 10.1002/14651858.CD005305.pub2.

Oh H & Seo W. Meta-analysis of the effects of respiratory rehabilitation programmes on exercise capacity in accordance with programme characteristics. Journal of Clinical Nursing. 2007; 16(1): 3-15.

Lacasse Y, Goldstein R, Lasserson TJ & Martin S. Pulmonary rehabilitation for chronic obstructive pulmonary disease. Cochrane Database of Systematic Reviews 2006, Issue 4. Art. No.: CD003793. DOI: 10.1002/14651858.CD003793.pub2.

**1.2 – Exercise**

**Recommendation 50: Aerobic and progressive resistance exercise** at least two times per week for at least 8 weeks appears feasible, safe and may be recommended for older adults with HIV with **mild to moderate chronic obstructive pulmonary disease (COPD)** for improvements in exercise capacity and muscle strength that may translate into improved activity performance and societal participation. Careful consideration is required when prescribing progressive resistance exercise programs for people with COPD who have comorbid health conditions.

**Level of Evidence:** Moderate (systematic reviews and meta-analyses but not Cochrane)

**Age of Participants in Research Evidence:** Mean age >58 years

**References**

O'Shea SD, Taylor NF & Paratz JD. Progressive resistance exercise improves muscle strength and may improve elements of performance of daily activities for people with COPD: A systematic review. *Chest*. 2009; 136(5): 1269-1283. Prepublished online September 4, 2009. DOI: 10.1378/chest.09-0029. Available from <http://chestjournal.chestpubs.org/content/136/5/1269.full.html>.

Chavannes N, Vollenberg JJH, van Schayck CP & Wouters EFM. Effects of physical activity in mild to moderate COPD: a systematic review. *British Journal of General Practice*. 2002; 52(480): 574-578.

**1.3 – Inspiratory Muscle Training (IMT)**

**Recommendation 51: Inspiratory muscle training (IMT)** is an important component of pulmonary rehabilitation and is strongly recommended for older adults living with HIV with chronic obstructive pulmonary disease (COPD) to improve inspiratory muscle strength and endurance, dyspnea, exercise capacity and quality of life. Optimal frequency, intensity, supervision and duration of IMT is unclear.

**Level of Evidence:** High (used Cochrane methodology)

**Age of Participants in Research Evidence:** Mean age 63 years

**References**

Geddes, E. L., O'Brien K, W. D. Reid, Brooks D & Crowe J. Inspiratory muscle training in adults with chronic obstructive pulmonary disease: a systematic review. *Respiratory Medicine*. 2008; 99(11): 1440-1458. DOI of original article: 10.1016/j.rmed.2008.07.005.

Lotters F, van Tol B, Kwakkel G & Gosselink R. Effects of controlled inspiratory muscle training in patients with COPD: A meta-analysis. *European Respiratory Journal*. 2002; 20(3): 570-576.



# Category

## J

### Diabetes

The prevalence of diabetes mellitus (DM) among adults living with HIV ranges from 3-15% (3, 55, 56). Diabetes mellitus is 2 times more prevalent among men compared to women living with HIV (3). With the presence of Hepatitis C, the prevalence of diabetes mellitus can increase up to 6% from 3% (55, 56).

Risk factors for developing diabetes include advancing age, being male, long period of HIV infection, and specific ethnicity (African Descent, Hispanic/Latino and Aboriginal) (5).

Adults living with HIV on combination antiretroviral therapy are at increased risk of developing diabetes, thus individuals should be screened for diabetes at onset of therapy initiation and about two to six months after (5).

#### Disability Experienced by Adults with Diabetes

Challenges faced among adults living with HIV and diabetes are lower body mass index preceded by impaired insulin tolerance and resistance, and high rates of Hepatitis C-virus infections (56, 57).

We present one recommendation for exercise for older adults living with HIV and diabetes.

#### J.1 – Exercise

**Recommendation 52: Aerobic resistive exercise** for at least 8 weeks is strongly recommended for older adults living with HIV with diabetes (type 2) to improve cardiopulmonary fitness and ensure glucose control. Optimal frequency, intensity, time and type of exercise are unclear however evidence suggests increased exercise prescription, fitness testing, supervision and group sessions at a greater number of times per week may be associated with greater health benefits. See the specific guidelines for more details.

**Explanatory Notes:** Exercise may also be considered as a preventative approach to prevent type 2 diabetes among older adults with HIV. Exercise may be particularly important in building up strength among PLHIV who may have had muscle wasting and poor nutrition related to diabetes

**Level of Evidence:** High (combination of Cochrane systematic reviews and meta-analyses not Cochrane)

**Age of Participants in Research Evidence:** Three of four studies - participant mean age 55 years (type 2 diabetes)

#### References

Nielsen PJ, Hafdahl AR, Conn VS, LeMaster JW & Brown SA. Meta-analysis of the effect of exercise interventions on fitness outcomes among adults with type 1 and type 2 diabetes. *Diabetes Research & Clinical Practice*. 2006; 74(2): 111-120.

Snowling NJ & Hopkins WG. Effects of Different Modes of Exercise Training on Glucose Control and Risk Factors for Complications in Type 2 Diabetic Patients. *Diabetes Care*. 2006; 29(11): 2518-27. Available from: <http://care.diabetesjournals.org/content/29/11/2518.full?sid=1c88f8f9-d4c9-4a13-9063-8613e7129ab5>.

1  
2 Thomas D, Elliott EJ & Naughton GA. Exercise for type 2 diabetes mellitus. *Cochrane Database of Systematic*  
3 *Reviews* 2006, Issue 3. Art. No.: CD002968. DOI: 10.1002/14651858.CD002968.pub2.  
4

5 Boulé NG, Kenny GP, Haddad E. Wells GA & Sigal RJ. Meta-analysis of the effect of structured exercise  
6 training on cardiorespiratory fitness in Type 2 diabetes mellitus. *Diabetologia*. 2003; 46(8):1071–1081.  
7  
8  
9  
10  
11  
12  
13  
14  
15  
16  
17  
18  
19  
20  
21  
22  
23  
24  
25  
26  
27  
28  
29  
30  
31  
32  
33  
34  
35  
36  
37  
38  
39  
40  
41  
42  
43  
44  
45  
46  
47  
48  
49  
50  
51  
52  
53  
54  
55

For peer review only

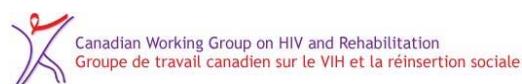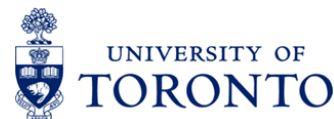



Figure 1: Overall Classification of Evidence-Informed Recommendations

**Stream A Recommendations**  
**HIV Aging and Rehabilitation**  
 Derived from 42 low or very low level evidence articles

**Stream B Recommendations**  
**Rehabilitation Interventions in Comorbidities**  
 Derived from 108 high level evidence articles (meta-analyses or systematic reviews)

| Recommendation Theme                                                                                                    | #         |
|-------------------------------------------------------------------------------------------------------------------------|-----------|
| Preparedness of Rehabilitation Professionals                                                                            | 1         |
| Approaches to Rehabilitation Assessment and Treatment (physical, mental, neurocognitive, uncertainty, social inclusion) | 7         |
| Extrinsic Factors to consider with rehabilitation of older adults with HIV (ageism, stigma, disclosure, social support) | 3         |
| Intrinsic Factors to consider with rehabilitation of older adults with HIV (self-management, spirituality)              | 2         |
| Rehabilitation Approaches (interprofessional practice, CAM)                                                             | 2         |
| Rehabilitation Interventions (exercise)                                                                                 | 1         |
| <b>Total # Recommendations</b>                                                                                          | <b>16</b> |

| Recommendation Classification                                                            | #         |
|------------------------------------------------------------------------------------------|-----------|
| <b>Bone and Joint Disorders</b><br>Exercise, rehabilitation, self-management             | 4         |
| <b>Cancer</b><br>Exercise                                                                | 4         |
| <b>Stroke</b><br>Rehabilitation, cognitive rehabilitation, electrotherapeutic modalities | 7         |
| <b>Cardiovascular Disease</b><br>Cardiac rehabilitation, exercise                        | 6         |
| <b>Mental Health</b><br>Exercise, psychotherapy, models of care and housing models       | 4         |
| <b>Cognitive Impairment</b><br>Exercise, cognitive rehabilitation                        | 3         |
| <b>COPD</b><br>Pulmonary rehabilitation, inspiratory muscle training, exercise           | 3         |
| <b>Diabetes</b><br>Exercise                                                              | 1         |
| <b>Older Adults</b><br>Exercise                                                          | 3         |
| <b>HIV</b><br>Exercise                                                                   | 1         |
| <b>Total # Recommendations</b>                                                           | <b>36</b> |

52 Detailed (Specific) Evidence-Informed Recommendations

Endorsement Rates for Each Recommendation Ranged from 53% - 100%

Overarching Recommendations on Rehabilitation for Older Adults with HIV (n=8)

1) Rehabilitation Professionals (RPs) should be prepared to provide care to older adults with HIV who present with complex comorbidities...

2) RPs should adopt an individualized approach to practice, sensitive to unique values, preferences and needs of older adults with HIV....

3) Multidisciplinary rehabilitation is strongly recommended across continuum of care...

4) RPs should consider the role of extrinsic contextual factors (stigma, ageism, HIV disclosure, social supports)....

5) RPs should consider the role of intrinsic contextual factors (self-management, spirituality) ....

6) Aerobic and resistive exercise may be recommended for older adults with HIV who are medically stable and living with comorbidities....

7) Cognitive rehabilitation interventions may be recommended for older adults with HIV with mild cognitive impairments and stroke...

8) In absence of high level evidence RPs should refer to high level evidence for recommendations on interventions for a specific comorbidity....



## Evidence-Informed Recommendations in Rehabilitation for Older Adults Living with HIV

## REFERENCES (Background)

1. Public Health Agency of Canada. HIV/AIDS Epi Update, Chapter 6: HIV/AIDS Among Older Canadians. Ontario, Canada: Centre for Communicable Disease and Infection Control, Public Health Agency of Canada. 2010.
2. Centre for Disease Control (CDC). HIV/AIDS Surveillance Report. Atlanta, US DHHS: Public Health Service, Centres for Disease Control and Prevention. 2007.
3. Magalhaes MG, Greenberg B, Hansen H, Glick M. Comorbidities in older patients with HIV: a retrospective study. *J Am Dent Assoc.* 2007;138(11):1468-75. Epub 2007/11/03.
4. Kearney F, Moore AR, Donegan CF, Lambert J. The ageing of HIV: implications for geriatric medicine. *Age and ageing.* 2010;39(5):536-41. Epub 2010/08/06.
5. Kalra S, Kalra B, Agrawal N, Unnikrishnan A. Understanding diabetes in patients with HIV/AIDS. *Diabetology & metabolic syndrome.* 2011;3(1):2. Epub 2011/01/15.
6. Carr A, Samaras K, Burton S, Law M, Freund J, Chisholm DJ, et al. A syndrome of peripheral lipodystrophy, hyperlipidaemia and insulin resistance in patients receiving HIV protease inhibitors. *Aids.* 1998;12(7):F51-8. Epub 1998/06/10.
7. Paccou J, Viget N, Legroux-Gerot I, Yazdanpanah Y, Cortet B. Bone loss in patients with HIV infection. *Joint, bone, spine : revue du rhumatisme.* 2009;76(6):637-41. Epub 2009/12/01.
8. Amorosa V, Tebas P. Bone disease and HIV infection. *Clinical infectious diseases : an official publication of the Infectious Diseases Society of America.* 2006;42(1):108-14. Epub 2005/12/03.
9. Lieberman R. HIV in older Americans: an epidemiologic perspective. *J Midwifery Womens Health.* 2000;45(2):176-82.
10. Arnsten JH, Freeman R, Howard AA, Floris-Moore M, Lo Y, Klein RS. Decreased bone mineral density and increased fracture risk in aging men with or at risk for HIV infection. *Aids.* 2007;21(5):617-23. Epub 2007/02/23.
11. Goodroad BK. HIV and AIDS in people older than 50. A continuing concern. *Journal of gerontological nursing.* 2003;29(4):18-24. Epub 2003/04/25.
12. Goulet JL, Fultz SL, Rimland D, Butt A, Gibert C, Rodriguez-Barradas M, et al. Aging and infectious diseases: do patterns of comorbidity vary by HIV status, age, and HIV severity? *Clinical infectious diseases : an official publication of the Infectious Diseases Society of America.* 2007;45(12):1593-601. Epub 2008/01/15.
13. Arnsten JH, Freeman R, Howard AA, Floris-Moore M, Santoro N, Schoenbaum EE. HIV infection and bone mineral density in middle-aged women. *Clinical infectious diseases : an official publication of the Infectious Diseases Society of America.* 2006;42(7):1014-20. Epub 2006/03/03.
14. Gerstner G, Damiano ML, Tom A, Worman C, Schultz W, Recht M, et al. Prevalence and risk factors associated with decreased bone mineral density in patients with haemophilia. *Haemophilia : the official journal of the World Federation of Hemophilia.* 2009;15(2):559-65. Epub 2009/02/04.
15. Cazanave C, Dupon M, Lavignolle-Aurillac V, Barthe N, Lawson-Ayayi S, Mehzen N, et al. Reduced bone mineral density in HIV-infected patients: prevalence and associated factors. *Aids.* 2008;22(3):395-402. Epub 2008/01/16.
16. Onen NF, Overton ET, Seyfried W, Stumm ER, Snell M, Mondy K, et al. Aging and HIV infection: a comparison between older HIV-infected persons and the general population. *HIV clinical trials.* 2010;11(2):100-9. Epub 2010/06/15.
17. Law MR, Hackshaw AK. A meta-analysis of cigarette smoking, bone mineral density and risk of hip fracture: recognition of a major effect. *Bmj.* 1997;315(7112):841-6. Epub 1997/11/14.

## Evidence-Informed Recommendations in Rehabilitation for Older Adults Living with HIV

18. Rahmanian S, Wewers ME, Koletar S, Reynolds N, Ferketich A, Diaz P. Cigarette smoking in the HIV-infected population. *Proceedings of the American Thoracic Society*. 2011;8(3):313-9. Epub 2011/06/10.
19. Tehranzadeh J, Ter-Oganesyan RR, Steinbach LS. Musculoskeletal disorders associated with HIV infection and AIDS. Part II: non-infectious musculoskeletal conditions. *Skeletal radiology*. 2004;33(6):311-20. Epub 2004/05/06.
20. Highly active antiretroviral therapy and incidence of cancer in human immunodeficiency virus-infected adults. *Journal of the National Cancer Institute*. 2000;92(22):1823-30. Epub 2000/11/18.
21. Patel P, Hanson DL, Sullivan PS, Novak RM, Moorman AC, Tong TC, et al. Incidence of types of cancer among HIV-infected persons compared with the general population in the United States, 1992-2003. *Annals of internal medicine*. 2008;148(10):728-36. Epub 2008/05/21.
22. Voutsadakis IS, LR. Breast Cancer in HIV-Positive Women: A Report of Four Cases and Review of the Literature. *Cancer Investigation*. 2002;20(4):452-7.
23. Frisch M, Biggar, RJ., Engles, EA., & Goedert, JJ. Association of Cancer With AIDS-Related Immunosuppression in Adults. *Journal of American Medical Association*. 2001;285(13):1736-45.
24. Guth AA. Breast Cancer and HIV: What Do We Know? *The American Surgeon*. March 1999;65(3):209-11.
25. Simard EP, Pfeiffer RM, Engels EA. Cumulative incidence of cancer among individuals with acquired immunodeficiency syndrome in the United States. *Cancer*. 2011;117(5):1089-96. Epub 2010/10/21.
26. Connor M. Human immunodeficiency virus (HIV) and stroke: targets for intervention. *Infectious disorders drug targets*. 2010;10(2):76-83. Epub 2010/02/20.
27. Dobbs MR, Berger JR. Stroke in HIV infection and AIDS. *Expert review of cardiovascular therapy*. 2009;7(10):1263-71. Epub 2009/10/10.
28. Ovbiagele B, Nath A. Increasing incidence of ischemic stroke in patients with HIV infection. *Neurology*. 2011;76(5):444-50. Epub 2011/01/21.
29. Langhorne P, Stott DJ, Robertson L, MacDonald J, Jones L, McAlpine C, et al. Medical complications after stroke: a multicenter study. *Stroke; a journal of cerebral circulation*. 2000;31(6):1223-9. Epub 2000/06/03.
30. Calza L, Manfredi R, Pocaterra D, Chiodo F. Risk of premature atherosclerosis and ischemic heart disease associated with HIV infection and antiretroviral therapy. *The Journal of infection*. 2008;57(1):16-32. Epub 2008/03/25.
31. Johns K, Saeedi R, Mancini GB, Bondy G. Ankle brachial index screening for occult vascular disease is not useful in HIV-positive patients. *AIDS research and human retroviruses*. 2010;26(9):955-9. Epub 2010/08/20.
32. Barros ZM, de Alencar Ximenes RA, Miranda-Filho DB, de Albuquerque Mde F, Melo HR, Carvalho EH, et al. Comparison between the Framingham and prospective cardiovascular of Munster scores for risk assessment of coronary heart disease in human immunodeficiency virus-positive patients in Pernambuco, Brazil. *Metabolic syndrome and related disorders*. 2010;8(6):489-97. Epub 2010/10/27.
33. Carr A, Grund B, Neuhaus J, El-Sadr WM, Grandits G, Gibert C, et al. Asymptomatic myocardial ischaemia in HIV-infected adults. *Aids*. 2008;22(2):257-67. Epub 2007/12/22.
34. Gardner LI, Klein RS, Szczech LA, Phelps RM, Tashima K, Rompalo AM, et al. Rates and risk factors for condition-specific hospitalizations in HIV-infected and uninfected women. *J Acquir Immune Defic Syndr*. 2003;34(3):320-30. Epub 2003/11/06.

## Evidence-Informed Recommendations in Rehabilitation for Older Adults Living with HIV

- 1
- 2
- 3 35. Shippy RA, Mendez D, Jones K, Cerngul I, Karpiak SE. S-adenosylmethionine (SAM-e) for the
- 4 treatment of depression in people living with HIV/AIDS. *BMC psychiatry*. 2004;4:38. Epub
- 5 2004/11/13.
- 6
- 7 36. Heckman TG, Heckman BD, Kochman A, Sikkema KJ, Suhr J, Goodkin K. Psychological symptoms
- 8 among persons 50 years of age and older living with HIV disease. *Aging & mental health*.
- 9 2002;6(2):121-8. Epub 2002/05/25.
- 10
- 11 37. Cherner M, Ellis RJ, Lazzaretto D, Young C, Mindt MR, Atkinson JH, et al. Effects of HIV-1 infection
- 12 and aging on neurobehavioral functioning: preliminary findings. *Aids*. 2004;18 Suppl 1:S27-34. Epub
- 13 2004/04/13.
- 14
- 15 38. Thames AD, Becker BW, Marcotte TD, Hines LJ, Foley JM, Ramezani A, et al. Depression,
- 16 cognition, and self-appraisal of functional abilities in HIV: an examination of subjective appraisal
- 17 versus objective performance. *The Clinical neuropsychologist*. 2011;25(2):224-43. Epub
- 18 2011/02/19.
- 19
- 20 39. Grov C, Golub SA, Parsons JT, Brennan M, Karpiak SE. Loneliness and HIV-related stigma explain
- 21 depression among older HIV-positive adults. *AIDS Care*. 2010;22(5):630-9. Epub 2010/04/20.
- 22
- 23 40. Meadows J, Le Marchal K, Catalan J. Mental health problems in older adults with HIV referred to a
- 24 psychological medicine unit. *AIDS Care*. 1998;10 Suppl 2:S105-12. Epub 1998/09/23.
- 25
- 26 41. Applebaum AJ, Otto MW, Richardson MA, Safren SA. Contributors to neuropsychological
- 27 impairment in HIV-infected and HIV-uninfected opiate-dependent patients. *Journal of clinical and*
- 28 *experimental neuropsychology*. 2010;32(6):579-89. Epub 2009/11/06.
- 29
- 30 42. Atkins JH, Rubenstein SL, Sota TL, Rueda S, Fenta H, Bacon J, et al. Impact of social support on
- 31 cognitive symptom burden in HIV/AIDS. *AIDS Care*. 2010;22(7):793-802. Epub 2010/07/17.
- 32
- 33 43. Antinori A, Arendt G, Becker JT, Brew BJ, Byrd DA, Cherner M, et al. Updated research nosology for
- 34 HIV-associated neurocognitive disorders. *Neurology*. 2007;69(18):1789-99. Epub 2007/10/05.
- 35
- 36 44. Cysique LA, Bain MP, Brew BJ, Murray JM. The burden of HIV-associated neurocognitive
- 37 impairment in Australia and its estimates for the future. *Sexual health*. 2011;8(4):541-50. Epub
- 38 2011/12/01.
- 39
- 40 45. McArthur JC, Sacktor N, Selnes O. Human immunodeficiency virus-associated dementia. *Seminars*
- 41 *in neurology*. 1999;19(2):129-50. Epub 2000/03/16.
- 42
- 43 46. Valcour VG, Shikuma CM, Watters MR, Sacktor NC. Cognitive impairment in older HIV-1-
- 44 seropositive individuals: prevalence and potential mechanisms. *Aids*. 2004;18 Suppl 1:S79-86. Epub
- 45 2004/04/13.
- 46
- 47 47. Hettige S, Samuel M, Clough C, Hulse N, Ashkan K. Deep brain stimulation for Parkinson's disease
- 48 when HIV coexists. *Movement disorders : official journal of the Movement Disorder Society*.
- 49 2009;24(14):2169-71. Epub 2009/09/08.
- 50
- 51 48. Ragin AB, Storey P, Cohen BA, Edelman RR, Epstein LG. Disease burden in HIV-associated cognitive
- 52 impairment: a study of whole-brain imaging measures. *Neurology*. 2004;63(12):2293-7. Epub
- 53 2004/12/30.
- 54
- 55 49. Vance DE, Struzick TC. Addressing risk factors of cognitive impairment in adults aging with HIV: a
- 56 social work model. *Journal of gerontological social work*. 2007;49(4):51-77. Epub 2007/10/24.
- 57
- 58 50. Vance DE. Aging with HIV: clinical considerations for an emerging population. *The American journal*
- 59 *of nursing*. 2010;110(3):42-7; quiz 8-9. Epub 2010/02/25.
- 60
- 51 51. Hardy DJ, Vance DE. The neuropsychology of HIV/AIDS in older adults. *Neuropsychology review*.
- 52 2009;19(2):263-72. Epub 2009/02/28.
- 53
- 54 52. Koutsilieris E, Sopper S, Scheller C, ter Meulen V, Riederer P. Parkinsonism in HIV dementia. *J Neural*
- 55 *Transm*. 2002;109(5-6):767-75. Epub 2002/07/12.

## Evidence-Informed Recommendations in Rehabilitation for Older Adults Living with HIV

- 1  
2  
3 53. Coultas DB, Mapel D, Gagnon R, Lydick E. The health impact of undiagnosed airflow obstruction in a  
4 national sample of United States adults. *American journal of respiratory and critical care medicine*.  
5 2001;164(3):372-7. Epub 2001/08/14.  
6  
7 54. Crothers K, Butt AA, Gibert CL, Rodriguez-Barradas MC, Crystal S, Justice AC. Increased COPD  
8 among HIV-positive compared to HIV-negative veterans. *Chest*. 2006;130(5):1326-33. Epub  
9 2006/11/14.  
10 55. Visnegarwala F, Chen L, Raghavan S, Tedaldi E. Prevalence of diabetes mellitus and dyslipidemia  
11 among antiretroviral naive patients co-infected with hepatitis C virus (HCV) and HIV-1 compared to  
12 patients without co-infection. *The Journal of infection*. 2005;50(4):331-7. Epub 2005/04/23.  
13 56. Brar I, Shuter J, Thomas A, Daniels E, Absalon J. A comparison of factors associated with prevalent  
14 diabetes mellitus among HIV-Infected antiretroviral-naive individuals versus individuals in the  
15 National Health and Nutritional Examination Survey cohort. *J Acquir Immune Defic Syndr*.  
16 2007;45(1):66-71. Epub 2007/01/25.  
17 57. Butt AA, McGinnis K, Rodriguez-Barradas MC, Crystal S, Simberkoff M, Goetz MB, et al. HIV  
18 infection and the risk of diabetes mellitus. *Aids*. 2009;23(10):1227-34. Epub 2009/05/16.  
19  
20  
21  
22  
23  
24  
25  
26  
27  
28  
29  
30  
31  
32  
33  
34  
35  
36  
37  
38  
39  
40  
41  
42  
43  
44  
45  
46  
47  
48  
49  
50  
51  
52  
53  
54  
55  
56  
57  
58  
59  
60

## Evidence-Informed Recommendations in Rehabilitation for Older Adults Living with HIV

## References from which the Recommendations were derived (in alphabetical order)

Older HIV patients deal with the double stigma of having the disease and being old. Big worry: 'Will I get to see grandkids if I tell?'. *AIDS Alert*. 2007; 22(2): 16-17.

Ackerman, M. Religiosity and Biopsychosocial Outcomes in HIV: A SEM Comparison of Gender, Race, and Sexual Orientation. *Southern Online Journal of Nursing Research*. 2008; 8(4) at: [http://www.resourcenter.net/images/snrs/files/sojnr\\_articles2/Vol08Num04A.html#Ackerman](http://www.resourcenter.net/images/snrs/files/sojnr_articles2/Vol08Num04A.html#Ackerman).

Ada L, Dorsch S & Canning CG. Strengthening interventions increase strength and improve activity after stroke: a systematic review. *Australian Journal of Physiotherapy*. 2006; 52(4): 241-248.

Angevaren M, Aufdemkampe G, Verhaar HJJ, Aleman A & Vanhees L. Physical activity and enhanced fitness to improve cognitive function in older people without known cognitive impairment. *Cochrane Database of Systematic Reviews* 2008, Issue 3. Art. No.: CD005381. DOI: 10.1002/14651858.CD005381.pub3.

Arent SM, Landers DM & Etnier JL. The effects of exercise on mood in older adults: a meta-analytic review. *Journal of Aging and Physical Activity*. 2000; 8(4):407-430.

Ashworth NL, Chad KE, Harrison EL, Reeder BA & Marshall SC. Home versus center based physical activity programs in older adults. *Cochrane Database of Systematic Reviews* 2005, Issue 1. Art.No.: CD004017. DOI: 10.1002/14651858.CD004017.pub2.

Aziz NA, Leonardi-Bee J, Phillips MF, Gladman J, Legg LA & Walker M. Therapy-based rehabilitation services for patients living at home more than one year after stroke. *Cochrane Database of Systematic Reviews* 2008, Issue 2. Art. No.: CD005952. DOI: 10.1002/14651858.CD005952.pub2.

Baker MK, Atlantis E & Fiatarone Singh MA. Multi-modal exercise programs for older adults: systematic review. *Age and Ageing*. 2007; 36(4): 375–381. DOI:10.1093/ageing/afm054

Bachmann S, Finger C, Huss A, Egger M, Stuck AE & Clough-Gorr KM. Inpatient rehabilitation specifically designed for geriatric patients: systematic review and meta-analysis of randomised controlled trials. *BMJ (Clinical research ed.)*. 2010; 340: c1718. DOI: <http://dx.doi.org/10.1136/bmj.c1718>.

Boulé NG, Kenny GP, Haddad E, Wells GA & Sigal RJ. Meta-analysis of the effect of structured exercise training on cardiorespiratory fitness in Type 2 diabetes mellitus. *Diabetologia*. 2003; 46(8):1071–1081.

Bowen A & Lincoln N. Cognitive rehabilitation for spatial neglect following stroke. *Cochrane Database of Systematic Reviews* 2007, Issue 2. Art. No.: CD003586. DOI: 10.1002/14651858.CD003586.pub2.

Brockow T, Markes M & Resch KL. Exercise for women receiving adjuvant therapy for breast cancer. *Cochrane Database of Systematic Reviews* 2006, Issue 4. Art. No.: CD005001. DOI: 10.1002/14651858.CD005001.pub2.



**Evidence-Informed Recommendations in Rehabilitation for Older Adults Living with HIV**

1  
2  
3 Brown J, Huedo-Medina TB, Pescatello LS, Pescatello SM, Ferrer RA & Johnson BT. Efficacy of Exercise  
4 Interventions in Modulating Cancer-Related Fatigue among Adult Cancer Survivors: A Meta-Analysis. *Cancer*  
5 *Epidemiol Biomarkers Prev.* 2011; 20:123-133. DOI:10.1158/1055-9965.EPI-10-0988.

6  
7  
8 Chan DNS, Lui LYY & So WK. Effectiveness of exercise programmes on shoulder mobility and lymphoedema  
9 after axillary lymph node dissection for breast cancer: systematic review. *Journal of Advanced Nursing.*  
10 2010; 66(9): 1902-1914.

11  
12 Chavannes N, Vollenberg JJH, van Schayck CP & Wouters EFM. Effects of physical activity in mild to  
13 moderate COPD: a systematic review. *British Journal of General Practice.* 2002; 52(480): 574-578.

14  
15 Chesney MA, Chambers DB, Taylor JM & Johnson LM. Social support, distress, and well-being in older men  
16 living with HIV infection. *Journal of Acquired Immune Deficiency Syndromes: JAIDS.* 2003; 33 Suppl 2: S185-  
17 193.

18  
19  
20 Chien C-L, Lee CM Wu Y-W, Chen T-A & Wu Y-T. Home-based exercise increases exercise capacity but not  
21 quality of life in people with chronic heart failure: a systematic review. *Australian Journal of Physiotherapy.*  
22 2008; 54(2): 87-93.

23  
24  
25 Chudyk AM, Jutai JW, Petrella RJ & Speechley M. Systematic Review of Hip Fracture Rehabilitation Practices  
26 in the Elderly. *Archives of Physical Medicine and Rehabilitation.* 2009; 90(2): 246-262.

27  
28 Clark AM, Hartling L, Vandermeer B & McAlister FA. Meta-analysis: Secondary prevention programs for  
29 patients with coronary artery. *Annals of Internal Medicine.* 2005; 143(9): 659-672. DOI: 10.7326/0003-  
30 4819-143-9-200511010-00010.

31  
32  
33 Cooke E, Mares K, Clark A, Tallis RC & Pomeroy VM. The effects of increased dose of exercise- based  
34 therapies to enhance motor recovery after stroke: a systematic review and meta-analysis. *BMC Medicine.*  
35 2010; 8:60. Available from: <http://www.biomedcentral.com/1741-7015/8/60>.

36  
37  
38 Craig LE, Bernhardt J, Langhorne P & Wu O. Early mobilization after stroke: an example of an individual  
39 patient data meta-analysis of a complex intervention. *Stroke.* 2010; 41(11): 2632-2636.

40  
41 Cramp F & Byron-Daniel J. Exercise for the management of cancer-related fatigue in adults. *Cochrane*  
42 *Database of Systematic Reviews* 2012, Issue 11. Art. No.: CD006145. DOI:  
43 10.1002/14651858.CD006145.pub3. Summary available from:  
44 <http://summaries.cochrane.org/CD006145/the-effect-of-exercise-on-fatigue-associated-with-cancer>

45  
46  
47 Cramp F & Daniel J. Exercise for the management of cancer-related fatigue in adults. *Cochrane Database of*  
48 *Systematic Reviews* 2008, Issue 2. Art. No.: CD006145. DOI: 10.1002/14651858.CD006145.pub2. Available  
49 from: <http://summaries.cochrane.org/CD006145/the-effect-of-exercise-on-fatigue-associated-with-cancer>.

**Evidence-Informed Recommendations in Rehabilitation for Older Adults Living with HIV**

1  
2  
3 Crotty M, Unroe K, Cameron ID, Miller M, Ramirez G & Couzner L. Rehabilitation interventions for  
4 improving physical and psychosocial functioning after hip fracture in older people. Cochrane database of  
5 systematic reviews 2010, DOI: 10.1002/14651858.CD007624.pub3. Available from:

6 [http://summaries.cochrane.org/CD007624/rehabilitation-interventions-for-improving-physical- and-  
8 psychosocial-functioning-after-hip-fracture-in-older-people](http://summaries.cochrane.org/CD007624/rehabilitation-interventions-for-improving-physical- and-<br/>7 psychosocial-functioning-after-hip-fracture-in-older-people)

9  
10 dasNair R & Lincoln N. Cognitive rehabilitation for memory deficits following stroke. *Cochrane Database of*  
11 *Systematic Reviews* 2007, Issue 3. Art. No.: CD002293. DOI: 10.1002/14651858.CD002293.pub2.

12  
13 Davies P, Taylor F, Beswick A, Wise F, Moxham T, Rees K & Ebrahim S. Promoting patient uptake and  
14 adherence in cardiac rehabilitation. *Cochrane Database of Systematic Reviews* 2010, Issue  
15 7. Art.No.: CD007131. DOI: 10.1002/14651858.CD007131.pub2.

16  
17 Davies EJ, Moxham T, Rees K, Singh S, Coats AJS, Ebrahim S, Lough F & Taylor RS. Exercise based  
18 rehabilitation for heart failure. *Cochrane Database of Systematic Reviews* 2010, Issue 4. Art. No.:  
19 CD003331. DOI: 10.1002/14651858.CD003331.pub3.

20  
21 Draper B & Low L-F. What is the effectiveness of acute hospital treatment of older people with mental  
22 disorders? *International Psychogeriatrics*. 2005; 17(4): 539-555.

23  
24 de Kam D, Smulders E, Weerdesteyn V & Smits-Engelsman BC. Exercise interventions to reduce fall-related  
25 fractures and their risk factors in individuals with low bone density: a systematic review of randomized  
26 controlled trials. *Osteoporosis International*. 2009; 20(12): 2111-212. DOI: 10.1007/s00198-009-0938-6.

27  
28 de Morton N, Keating JL & Jeffs K. Exercise for acutely hospitalised older medical patients. *Cochrane*  
29 *Database of Systematic Reviews* 2007, Issue 1. Art. No.: CD005955. DOI:  
30 10.1002/14651858.CD005955.pub2.

31  
32 de Souza PML, Filho WJ, Santarem JM, da Silva AR, Li HY & Burattini MN. Progressive resistance training on  
33 elderly HIV+ patients: Does it work? *American Journal of Infectious Diseases*. 2008; 4(4): 215-219.

34  
35 Emler CA. An examination of the social networks and social isolation in older and younger adults living with  
36 HIV/AIDS. *Health & Social Work*. 2006; 31(4): 299-308.

37  
38 Emler CA. HIV/AIDS and Aging: A Diverse Population of Vulnerable Older Adults. *Journal of Human Behavior*  
39 *in the Social Environment*. 2004; 9(4): 45-63.

40  
41 Emler CA & Farkas KJ. A descriptive analysis of older adults with HIV/AIDS in California. *Health & Social*  
42 *Work*. 2001; 26(4): 226-234.

43  
44 English C & Hillier S. Circuit class therapy for improving mobility after stroke: a systematic review. *J Rehabil*  
45 *Med*. 2011; 43: 565-571.

46  
47 Evans WJ, Roubenoff R & Shevitz A. Exercise and the treatment of wasting: aging and human  
48 immunodeficiency virus infection. *Seminars in Oncology*. 1998; 25(2 Suppl 6): 112-122.



## Evidence-Informed Recommendations in Rehabilitation for Older Adults Living with HIV

1  
2  
3 Forbes D, Forbes S, Morgan DG, Markle-Reid M, Wood J & Culum I. Physical activity programs for persons  
4 with dementia. *Cochrane Database of Systematic Reviews* 2008, Issue 3. Art. No.: CD006489. DOI:  
5 10.1002/14651858.CD006489.pub2.  
6

7  
8 Fransen M & McConnell S. Exercise for osteoarthritis of the knee. *Cochrane Database of Systematic*  
9 *Reviews* 2008, Issue 4. Art. No.: CD004376. DOI: 10.1002/14651858.CD004376.pub2. Available from:  
10 <http://onlinelibrary.wiley.com/doi/10.1002/14651858.CD004376.pub2/pdf>  
11

12 Fransen M & McConnell S, Hernandez-Molina G, Reichenbach S. Exercise for osteoarthritis of the hip.  
13 *Cochrane Database of Systematic Reviews* 2009, Issue 3. Art. No.: CD007912. DOI:  
14 10.1002/14651858.CD007912. Available from:  
15 <http://onlinelibrary.wiley.com/doi/10.1002/14651858.CD007912/full>  
16

17  
18 French B, Thomas L, Leathley M, Sutton C, McAdam J, Forster A, Langhorne P, Price C, Walker A & Watkins  
19 C. Does repetitive task training improve functional activity after stroke? A Cochrane systematic review and  
20 meta-analysis. *J Rehabil Med.* 2010; 42: 9–14  
21

22  
23 Geddes, E. L., O'Brien K, W. D. Reid, Brooks D & Crowe J. Inspiratory muscle training in adults with chronic  
24 obstructive pulmonary disease: a systematic review. *Respiratory Medicine.* 2008; 99(11): 1440-1458. DOI of  
25 original article: 10.1016/j.rmed.2008.07.005.  
26

27  
28 Glanz M, Klawansky S, Stason W, Berkey C & Chalmers TC. Functional electrostimulation in poststroke  
29 rehabilitation: a meta-analysis of the randomized controlled trials. *Archives of Physical Medicine &*  
30 *Rehabilitation.* 1996; 77(6): 549-553.  
31

32  
33 Grov C, Golub SA, Parsons JT, Brennan M & Karpiak SE. Loneliness and HIV-related stigma explain  
34 depression among older HIV-positive adults. *AIDS Care - Psychological and Socio-Medical Aspects* of  
35 *AIDS/HIV.* 2010; 22(5): 630-639.  
36

37  
38 Gu MO & Conn VS. Meta-analysis of the effects of exercise interventions on functional status in older  
39 adults. *Research in Nursing & Health.* 2008; 31(6): 594–603 [Published online 10 June 2008 in Wiley  
40 *InterScience*]. DOI: 10.1002/nur.20290.  
41

42  
43 Gutheil IA & Chichin ER. AIDS, older people, and social work. *Health & Social Work.* 1991; 16(4): 237-244.  
44 Halbert J, Crotty M, Whitehead C, Cameron I, Kurrle S, Graham S, Handoll H, Finnegan T, Jones T, Foley A &  
45 Shanahan M. Multi-disciplinary rehabilitation after hip fracture is associated with improved outcome: A  
46 systematic review. *Journal of Rehabilitation Medicine.* 2007; 39(7): 507-512.  
47

48  
49 Halbert JA, Silagy CA, Finucane P, Withers RT & Hamdorf PA. Exercise training and blood lipids in  
50 hyperlipidemic and normolipidemic adults: a meta-analysis of randomized, controlled trials. *European*  
51 *Journal of Clinical Nutrition.* 1999; 53(7): 514-522.  
52

53  
54 Halbert JA, Silagy CA, Finucane P, Withers RT, Hamdorf PA & Andrews GR. The effectiveness of exercise  
55 training in lowering blood pressure: a meta-analysis of randomised controlled trials of 4 weeks or longer.  
56 *Journal of Human Hypertension.* 1997; 11(10): 641-649.  
57

**Evidence-Informed Recommendations in Rehabilitation for Older Adults Living with HIV**

1  
2  
3 Handoll HHG, Cameron ID, Mak JCS, & Finnegan TP. Multidisciplinary rehabilitation for older people with  
4 hip fractures. *Cochrane Database of Systematic Reviews* 2009, Issue 4. Art. No.: CD007125. DOI:  
5 10.1002/14651858.CD007125.pub2. Available from:

6 [http://summaries.cochrane.org/CD007125/multidisciplinary-rehabilitation-of-older-patients-with-hip-  
8 fractures](http://summaries.cochrane.org/CD007125/multidisciplinary-rehabilitation-of-older-patients-with-hip-<br/>7 fractures).

9  
10 Handoll HH, Sherrington C & Parker MJ. Mobilisation strategies after hip fracture surgery in adults.  
11 *Cochrane database of systematic reviews* 2004, Issue 1: 1-94. DOI: 10.1002/14651858.CD001704.pub3.  
12 Available from: <http://onlinelibrary.wiley.com/doi/10.1002/14651858.CD001704.pub4/full>.

13  
14 Hauer K, Becker C, Lindemann U & Beyer N. Effectiveness of physical training on motor performance and  
15 fall prevention in cognitively impaired older persons: A systematic review. *American Journal of Physical  
16 Medicine and Rehabilitation*. 2006; 85(10): 847-857.

17  
18 Haykowsky M, Clark AM, Liang Y, Pechter D, Jones LW & McAlister FA. A meta-analysis of the effect of  
19 exercise training on left ventricular remodeling in heart failure patients: The benefit depends on the type of  
20 training performed. *ACC Cardiosource Review Journal*. 2007; 16(10): 33- 37.

21  
22 Heckman TG, Barcikowski R, Ogles B, Suhr J, Carlson B, Holroyd K & Garske J. A Telephone-Delivered Coping  
23 Improvement Group Intervention for Middle-Aged and Older Adults Living With HIV/AIDS. *Annals of  
24 Behavioral Medicine*. 2006; 32(1): 27-38.\*

25  
26 Heckman TG, Heckman BD, Kochman A, Sikkema KJ, Suhr J & Goodkin K. Psychological symptoms among  
27 persons 50 years of age and older living with HIV disease. *Aging & Mental Health*. 2002; 6(2): 121-128.

28  
29 Heckman TG, Kochman A, Sikkema KJ, Kalichman SC, Masten J, Bergholte J & Catz S. A pilot coping  
30 improvement intervention for late middle-aged and older adults living with HIV/AIDS in the USA. *AIDS Care*.  
31 2001; 13(1): 129-139.\*

32  
33 Heckman TG, Kochman A, Sikkema KJ, Kalichman SC, Masten J & Goodkin K. Late middle-aged and older  
34 men living with HIV/AIDS: race differences in coping, social support, and psychological distress. *Journal of  
35 the National Medical Association*. 2000; 92(9): 436-444.

36  
37 Heckman TG, Kochman A & Sikkema KJ. Depressive symptoms in older adults living with HIV disease:  
38 Application of the Chronic Illness Quality of Life Model. *Journal of Mental Health and Aging*. 2002; 8(4): 267-  
39 279.

40  
41 Heckman TG, Kochman A, Sikkema KJ & Kalichman SC. Depressive symptomatology, daily stressors, and  
42 ways of coping among middle-age and older adults living with HIV disease. *Journal of Mental Health and  
43 Aging*. 1999; 5(4): 311-322.

44  
45 Herkner H, Thoennissen J, Nikfardjam M, Koreny M, Laggner AN & Mullner M. Short versus prolonged bed  
46 rest after uncomplicated acute myocardial infarction: a systematic review and meta-analysis. *Journal of  
47 Clinical Epidemiology*. 2003; 56(8): 775-781.

## Evidence-Informed Recommendations in Rehabilitation for Older Adults Living with HIV

1  
2  
3 Herring MP, O'Connor PJ & Dishman RK. The effect of exercise training on anxiety symptoms among  
4 patients: a systematic review. *Archives of Internal Medicine*. 2010; 170(4): 321-331.

5  
6 Heyn P, Abreu BC & Ottenbacher KJ. The effects of exercise training on elderly persons with cognitive  
7 impairment and dementia: a meta-analysis. *Archives of Physical Medicine & Rehabilitation*. 2004; 85(10):  
8 1694-1704.

9  
10  
11 Heyn PC, Johnson KE & Kramer AF. Endurance and strength training outcomes on cognitively impaired and  
12 cognitively intact older adults: a meta-analysis. *Journal of Nutrition, Health & Aging*. 2008; 12(6): 401-409.

13  
14 Hillman JL & Stricker G. Some issues in the assessment of HIV among older adult patients. *Psychotherapy*.  
15 1998; 35 (4): 483-489.

16  
17  
18 Hines ME. Commentary on "biopsychosocial benefits of spirituality in adults aging with HIV: implications for  
19 nursing practice and research". New challenges for providing spiritual care in aging patients with HIV.  
20 *Journal of Holistic Nursing*. 2008; 26(2): 126-127.

21  
22  
23 Hoffmann T, Bennett S, Koh CL & McKenna KT. Occupational therapy for cognitive impairment in stroke  
24 patients. *Cochrane Database of Systematic Reviews* 2010, Issue 9. Art. No.: CD006430. DOI:  
25 10.1002/14651858.CD006430.pub2.

26  
27  
28 Howe TE, Rochester L, Jackson A, Banks PMH & Blair VA. Exercise for improving balance in older people.  
29 *Cochrane Database of Systematic Reviews* 2007, Issue 4. Art. No.: CD004963. DOI:  
30 10.1002/14651858.CD004963.pub2.

31  
32 Huang G, Gibson CA, Tran ZV & Osness WH. Controlled endurance exercise training and VO<sub>2</sub>max changes in  
33 older adults: a meta-analysis. *Preventive Cardiology*. 2005; 8(4): 217-225.

34  
35  
36 Ingram C, Courneya KS & Kingston D. The Effects of Exercise on Body Weight and Composition in Breast  
37 Cancer Survivors: An Integrative Systematic Review. *Oncology Nursing Forum*. 2006; 33(5): 937.

38  
39  
40 Jean L, Bergeron ME, Thivierge S & Simard M. Cognitive intervention programs for individuals with mild  
41 cognitive impairment: Systematic review of the literature. *American Journal of Geriatric Psychiatry*. 2010;  
42 18(4): 281-296.

43  
44  
45 Jolliffe J, Rees K, Taylor RRS, Thompson DR, Oldridge N & Ebrahim S. Exercise-based rehabilitation for  
46 coronary heart disease. *Cochrane Database of Systematic Reviews* 2001, Issue 1. Art. No.: CD001800. DOI:  
47 10.1002/14651858.CD001800.

48  
49  
50 Kalichman SC, Heckman T, Kochman A, Sikkema K & Bergholte J. Depression and thoughts of suicide among  
51 middle-aged and older persons living with HIV-AIDS. *Psychiatric Services*. 2000; 51(7): 903-907.

52  
53  
54 Kessels RPC & Haan EHF. Implicit Learning in Memory Rehabilitation: A Meta- Analysis on Errorless  
55 Learning and Vanishing Cues Methods', *Journal of Clinical and Experimental Neuropsychology*. 2003; 25(6),  
56 805-814. DOI: 10.1076/jcen.25.6.805.16474.

**Evidence-Informed Recommendations in Rehabilitation for Older Adults Living with HIV**

1  
2  
3 Keigher SM, Stevens PE & Plach SK. Midlife women with HIV: health, social, and economic factors shaping  
4 their futures. *Journal of HIV/AIDS & Social Services*. 2004; 3(1): 43-58.

5  
6  
7 Kim CJ, Kang DH & Park JW. A Meta-Analysis of Aerobic Exercise Interventions for Women With Breast  
8 Cancer. *Western Journal of Nursing Research*. 2009; 31(4): 437-461.

9  
10 Knols R, Aaronson NK, Uebelhart D, Franssen J & Aufdemkampe D. Physical Exercise in Cancer Patients  
11 During and After Medical Treatment: A Systematic Review of Randomized and Controlled Clinical Trials. *J*  
12 *Clin Oncol*. 2005; 23(16): 3830-3842.

13  
14 Kottink AI, Oostendorp LJ, Buurke JH, Nene AV, Hermens HJ & IJzerman MJ. The orthotic effect of functional  
15 electrical stimulation on the improvement of walking in stroke patients with a dropped foot: a systematic  
16 review. *Artificial Organs*. 2004; 28(6): 577-586.

17  
18  
19 Kwakkel G, van Peppen R, Wagenaar RC, Wood Dauphinee S, Richards C, Ashburn A, Miller K, Lincoln N,  
20 Partridge C, Wellwood I & Langhorne P. Effects of augmented exercise therapy time after stroke: A meta-  
21 analysis. *Stroke*. 2004; 35(11):2529-2539. Originally published online October 7, 2004. DOI:  
22 10.1161/01.STR.0000143153.76460.7d.

23  
24  
25 Lacasse Y, Goldstein R, Lasserson TJ & Martin S. Pulmonary rehabilitation for chronic obstructive pulmonary  
26 disease. *Cochrane Database of Systematic Reviews* 2006, Issue 4. Art. No.: CD003793. DOI:  
27 10.1002/14651858.CD003793.pub2.

28  
29  
30 Langhorne P & Widen-Holmqvist L. Early supported discharge after stroke. *Journal of Rehabilitation*  
31 *Medicine*. 2007; 39: 103-108. DOI: 10.2340/16501977-0042.

32  
33 Lee MM & Camp CJ. Clinical comments. Spaced retrieval: a memory intervention for HIV+ older adults.  
34 *Clinical Gerontologist*. 2001; 22(3/4): 131-135.\*

35  
36  
37 Leff HS, Chow CM, Pepin R, Conley J, Allen IE & Seaman CA. Does one size fit all? What we can and can't  
38 learn from a meta-analysis of housing models for persons with mental illness. *Psychiatric Services*. 2009;  
39 60(4): 473-482.

40  
41 Legg L, Langhorne P & Outpatient Service Trialists. Rehabilitation therapy services for stroke patients living  
42 at home: systematic review of randomised trials. *Lancet*. 2004; 363(9406): 352-356.

43  
44  
45 Legg L, Drummond A, Leonardi-Bee J, Gladman JRF, Corr S, Donkervoort M, Edmans J, Gilbertson L,  
46 Jongbloed L, Logan P, Sackley C, Walker M & Langhorne P. Occupational therapy for patients with problems  
47 in personal activities of daily living after stroke: systematic review of randomised trials. *BMJ*. 2007;  
48 335(7626): 922.

49  
50 Lloyd-Williams F, Mair FS & Leitner M. Exercise training and heart failure: a systematic review of current  
51 evidence. *British Journal of General Practice*. 2002; 52(474): 47-55.

52  
53  
54 Lotters F, van Tol B, Kwakkel G & Gosselink R. Effects of controlled inspiratory muscle training in patients  
55 with COPD: A meta-analysis. *European Respiratory Journal*. 2002; 20(3): 570-576.

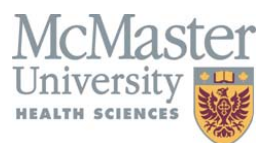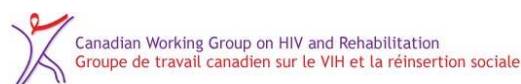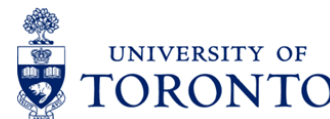

## Evidence-Informed Recommendations in Rehabilitation for Older Adults Living with HIV

1  
2  
3 Liu CJ & Latham NK. Progressive resistance strength training for improving physical function in older  
4 adults. *Cochrane Database of Systematic Reviews* 2009, Issue 3. Art. No.: CD002759. DOI:  
5 10.1002/14651858.CD002759.pub2  
6

7  
8 Malone MA. HIV-positive women over fifty: how they cope. *AIDS Patient Care & Stds.* 1998; 12(8): 639-643.  
9

10  
11 Martyn-St James M & Carroll S. A meta-analysis of impact exercise on postmenopausal bone loss: The case  
12 for mixed loading exercise programmes. *Br J Sports Med.* 2009 43(12): 898-908. Originally published online  
13 November 3, 2008. DOI: 10.1136/bjism.2008.052704. Available at:  
14 <http://bjisportmed.com/content/43/12/898.abstract>.  
15

16  
17 Mavandadi S, Zanjani F, Ten Have TR & Oslin DW. Psychological well-being among individuals aging with  
18 HIV: the value of social relationships. *Journal of Acquired Immune Deficiency Syndromes: JAIDS.* 2009;  
19 51(1): 91-98.  
20

21  
22 McNeely ML, Campbell K, Ospina M, Rowe BH, Dabbs K, Klassen TP, Mackey J & Courneya K. Exercise  
23 interventions for upper-limb dysfunction due to breast cancer treatment. *Cochrane Database of Systematic  
24 Reviews* 2010, Issue 6. Art. No.: CD005211. DOI: 10.1002/14651858.CD005211.pub2.  
25

26  
27 McNeely ML, Campbell K, Ospina M, Rowe BH, Dabbs K, Klassen TP, Mackey J & Courneya K. Exercise  
28 interventions for upper-limb dysfunction due to breast cancer treatment. *CMAJ.* 2006; 175(1):34-41.  
29 DOI:10.1503/cmaj.051073.  
30

31  
32 Meek C, Pollock A, Potter J & Langhorne P. A systematic review of exercise trials post stroke. *Clinical  
33 Rehabilitation.* 2003; 17(1): 6-13.  
34

35  
36 Mehrholz J, Werner C, Kugler J & Pohl M. Electromechanical-assisted training for walking after stroke.  
37 *Cochrane Database of Systematic Reviews* 2007, Issue 4. Art. No.: CD006185. DOI:  
38 10.1002/14651858.CD006185.pub2.  
39

40  
41 Moreland J & Thomson MA. Efficacy of electromyographic biofeedback compared with conventional  
42 physical therapy for upper-extremity function in patients following stroke: a research overview and meta-  
43 analysis. *Physical Therapy.* 1994; 74(6): 534-54.  
44

45  
46 Moseley AM, Stark A, Cameron ID & Pollock A. Treadmill training and body weight support for walking after  
47 stroke. *Cochrane Database of Systematic Reviews* 2005, Issue 4. Art. No.: CD002840. DOI:  
48 10.1002/14651858.CD002840.pub2.  
49

50  
51 Mullen PD, Mains DA & Velez R. A meta-analysis of controlled trials of cardiac patient education. *Patient  
52 Education & Counseling.* 1992; 19(2): 143-162. DOI: [10.1016/0738-3991\(92\)90194-N](https://doi.org/10.1016/0738-3991(92)90194-N).  
53

54  
55 Netz Y, Wu M-J, Becker BJ, & Tenebaum G. Physical activity and psychological well-being in advanced age: A  
56 meta-analysis of intervention studies. *Psychology and Aging.* 2005; 20(2): 272-284. DOI: 10.1037/0882-  
57 7974.20.2.272.  
58



**Evidence-Informed Recommendations in Rehabilitation for Older Adults Living with HIV**

1  
2  
3 Neundorfer MM, Camp CJ, Lee MM, Skrajner MJ, Malone ML & Carr JR. Compensating for cognitive deficits  
4 in persons aged 50 and over with HIV/AIDS, *Journal of HIV/AIDS & Social Services*. 2004; 3(1): 79-97.

5  
6 Nielsen PJ, Hafdahl AR, Conn VS, LeMaster JW & Brown SA. Meta-analysis of the effect of exercise  
7 interventions on fitness outcomes among adults with type 1 and type 2 diabetes. *Diabetes Research &*  
8 *Clinical Practice*. 2006; 74(2): 111-120.

9  
10 Nokes KM, Chew L & Altman C. Using a telephone support group for HIV-positive persons aged 50+ to  
11 increase social support and health-related knowledge. *AIDS Patient Care & Stds*. 2003; 17(7): 345-351.\*

12  
13 O'Brien K, Nixon S, Tynan AM & Glazier R. Aerobic exercise interventions for adults living with HIV/AIDS.  
14 *Cochrane Database of Systematic Reviews* 2010, Issue 8. Art. No.: CD001796. DOI:  
15 10.1002/14651858.CD001796.pub3.

16  
17 O'Brien K, Tynan AM, Nixon S & Glazier RH. Effects of progressive resistive exercise in adults living with  
18 HIV/AIDS: systematic review and meta-analysis of randomized trials. *AIDS Care*. 2008; 20(6): 631-653.  
19 Available from: <http://dx.doi.org/10.1080/09540120701661708>.

20  
21 Oh H & Seo W. Meta-analysis of the effects of respiratory rehabilitation programmes on exercise capacity in  
22 accordance with programme characteristics. *Journal of Clinical Nursing*. 2007; 16(1): 3- 15.

23  
24 O'Shea SD, Taylor NF & Paratz JD. Progressive resistance exercise improves muscle strength and may  
25 improve elements of performance of daily activities for people with COPD: A systematic review. *Chest*.  
26 2009; 136(5): 1269-1283. Prepublished online September 4, 2009. DOI: 10.1378/chest.09-0029. Available  
27 from: <http://chestjournal.chestpubs.org/content/136/5/1269.full.html>.

28  
29 Ottawa Panel. Ottawa Panel Evidence-Based Clinical Practice Guidelines for Post-Stroke Rehabilitation. *Top*  
30 *Stroke Rehabil*. 2006; 13(2):1-269

31  
32 Oursler KK, Katzel LI, Smith BA, Scott WB, Russ DW & Sorkin JD. Prediction of cardiorespiratory fitness in  
33 older men infected with the human immunodeficiency virus: clinical factors and value of the six-minute  
34 walk distance. *Journal of the American Geriatrics Society*. 2009; 57(11): 2055-2061

35  
36 Oursler KK, Sorkin JD, Smith BA & Katzel LI. Reduced aerobic capacity and physical functioning in older HIV  
37 infected men. *AIDS Research & Human Retroviruses*. 2006; 22(11): 1113-1121.

38  
39 Pang MYC, Eng JJ, Dawson AS & Gylfadottir S. The use of aerobic exercise training in improving aerobic  
40 capacity in individuals with stroke: a meta-analysis. *Clinical Rehabilitation*. 2006; 20(2): 97-111.

41  
42 Park NW & Ingles JL. Effectiveness of attention rehabilitation after an acquired brain injury: a meta-analysis.  
43 *Neuropsychology*. 2001; 15(2): 199-210.

44  
45 Plach SK, Stevens PE & Keigher S. Self-care of women growing older with HIV and/or AIDS. *Western Journal*  
46 *of Nursing Research*. 2005; 27(5): 534-553.

**Evidence-Informed Recommendations in Rehabilitation for Older Adults Living with HIV**

1  
2  
3 Pitts M, Grierson J & Misson S. Growing older with HIV: a study of health, social and economic  
4 circumstances for people living with HIV in Australia over the age of 50 years. *AIDS Patient Care & Stds.*  
5 2005; 19(7): 460-465.  
6

7  
8 Poindexter CC. Six champions speak about being over 50 and living with HIV. *Journal of HIV/AIDS & Social*  
9 *Services.* 2004; 3(1): 99-117.  
10

11 Poindexter C & Shippy RA. Networks of older New Yorkers with HIV: fragility, resilience, and transformation.  
12 *AIDS Patient Care & Stds.* 2008; 22(9): 723-733.  
13

14 Pollock A, Baer G, Langhorne P & Pomeroy V. Physiotherapy treatment approaches for the recovery of  
15 postural control and lower limb function following stroke: a systematic review. *Clinical Rehabilitation.* 2007;  
16 21(5): 395-410.  
17

18  
19 Puhan MA, Gimeno-Santos E, Scharplatz M, Troosters T, Walters EH & Steurer J. Pulmonary rehabilitation  
20 following exacerbations of chronic obstructive pulmonary disease. *Cochrane Database of Systematic*  
21 *Reviews* 2009, Issue 1. Art. No.: CD005305. DOI: 10.1002/14651858.CD005305.pub2.  
22

23  
24 Robinson L, Hutchings D, Dickinson HO, Corner L, Beyer F, Finch T, Hughes J, Vanoli A, Ballard C & Bond J.  
25 Effectiveness and acceptability of non-pharmacological interventions to reduce wandering in dementia: a  
26 systematic review. *International Journal of Geriatric Psychiatry.* 2007; 22(1): 9-22.  
27

28  
29 Saunders DH, Greig CA, Mead GE & Young A. Physical fitness training for stroke patients. *Cochrane*  
30 *Database of Systematic Reviews* 2009, Issue 4. Art. No.: CD003316. DOI:10.1002/14651858.CD003316.pub3.  
31

32 Schabrun SM & Hillier S. Evidence for the retraining of sensation after stroke: a systematic review. *Clinical*  
33 *Rehabilitation.* 2009; 23: 27-39  
34

35 Schrimshaw EW & Siegel K. Perceived barriers to social support from family and friends among older adults  
36 with HIV/AIDS. *Journal of Health Psychology.* 2003; 8(6): 738-752.  
37

38 Senior K. Growing old with HIV. *The Lancet Infectious Diseases.* 2005; 5(12): 739.  
39

40 Siegel K, Dean L & Schrimshaw EW. Symptom ambiguity among late-middle-aged and older adults with HIV.  
41 *Research on Aging.* 1999; 21(4): 595-618.  
42

43  
44 Sjosten N & Kivela SL. The effects of physical exercise on depressive symptoms among the aged: a  
45 systematic review. *International Journal of Geriatric Psychiatry.* 2006; 21(5): 410-418.  
46

47  
48 Shippy RA. Taking care of each other. GMHC treatment issues : the Gay Men's Health Crisis newsletter of  
49 experimental AIDS therapies. 2007; 21(2): 7-8.  
50

51 Shippy R & Karpiak SE. Perceptions of Support Among Older Adults With HIV. *Research on Aging.* 2005;  
52 27(3): 290-306.  
53  
54  
55



**Evidence-Informed Recommendations in Rehabilitation for Older Adults Living with HIV**

1  
2  
3 Shippy RA & Karpiak SE. The aging HIV/AIDS population: fragile social networks. *Aging & Mental Health*.  
4 2005; 9(3): 246-254.  
5

6  
7 Smart N & Marwick TH. Exercise training for patients with heart failure: a systematic review of factors  
8 that improve mortality and morbidity. *American Journal of Medicine*. 2004; 116(10): 693-706.  
9

10 Smith PJ, Blumenthal JA, Hoffman BM, Cooper H, Strauman TA, Welsh-Bohmer K, Browndyke JN &  
11 Sherwood A. Aerobic Exercise and Neurocognitive Performance: A Meta-Analytic Review of Randomized  
12 Controlled Trials. *Psychosomatic Medicine*. 2010; 72(3): 239–252. DOI: 10.1097/PSY.0b013e3181d14633.  
13

14  
15 Snowling NJ & Hopkins WG. Effects of Different Modes of Exercise Training on Glucose Control and Risk  
16 Factors for Complications in Type 2 Diabetic Patients. *Diabetes Care*. 2006; 29(11): 2518-27. Available from:  
17 <http://care.diabetesjournals.org/content/29/11/2518.full?sid=1c88f8f9-d4c9-4a13-9063-8613e7129ab5>.  
18

19 Solà I, Thompson EM, Subirana Casacuberta M, Lopez C & Pascual A. Non-invasive interventions for  
20 improving well-being and quality of life in patients with lung cancer. *Cochrane Database of Systematic*  
21 *Reviews* 2004, Issue 4. Art. No.: CD004282. DOI: 10.1002/14651858.CD004282.pub2.  
22

23  
24 Spence RR, Heesch KC & Brown WJ. Exercise and cancer rehabilitation: A systematic review. *Cancer*  
25 *Treatment Reviews*. 2010; 36 (2) 185–194. DOI: 10.1016/j.ctrv.2009.11.003.  
26

27 States RA, Pappas E & Salem Y. Overground physical therapy gait training for chronic stroke patients with  
28 mobility deficits. *Cochrane Database of Systematic Reviews* 2009, Issue 3. Art. No.: CD006075. DOI:  
29 10.1002/14651858.CD006075.pub2.  
30

31  
32 Steultjens EM, Dekker J, Bouter LM, Jellema S, Bakker EB & van den Ende CH. Occupational therapy for  
33 community dwelling elderly people: a systematic review. *Age & Ageing*. 2004; 33(5): 453-460.  
34

35 Tambalis K, Panagiotakos DB, Kavouras SA & Sidossis LS. Responses of blood lipids to aerobic, resistance,  
36 and combined aerobic with resistance exercise training: A systematic review of current evidence.  
37 *ANGIOLOGY* 2009 60: 614. Originally published online 30 October 2008. Available from:  
38 <http://ang.sagepub.com/content/60/5/614>.  
39

40 Taylor RS, Dalal H, Jolly K, Moxham T & Zawada A. Home-based versus centre-based cardiac rehabilitation.  
41 *Cochrane Database of Systematic Reviews* 2010, Issue 1. Art. No.: CD007130. DOI:  
42 10.1002/14651858.CD007130.pub2.  
43

44  
45 Thomas D, Elliott EJ & Naughton GA. Exercise for type 2 diabetes mellitus. *Cochrane Database of Systematic*  
46 *Reviews* 2006, Issue 3. Art. No.: CD002968. DOI: 10.1002/14651858.CD002968.pub2.  
47

48  
49 Valkeinen H, Aaltonen S & Kujala UM. Effects of exercise training on oxygen uptake in coronary heart  
50 disease: a systematic review and meta-analysis. *Scandinavian Journal of Medicine & Science in Sports*.  
51 2010; 20(4): 545-555. DOI: 10.1111/j.1600-0838.2010.01133.x.  
52

53  
54 Vance D E. Self-rated emotional health in adults with and without HIV. *Psychological Reports*. 2006; 98(1):  
55 106-108.  
56



**Evidence-Informed Recommendations in Rehabilitation for Older Adults Living with HIV**

1  
2  
3  
4 Vance DE & Burrage Jr JW. Promoting successful cognitive aging in adults with HIV: Strategies for  
5 intervention. *Journal of Gerontological Nursing*. 2006; 32(11):34-41.

6  
7  
8 Vance DE & Burrage Jr JW. Cognitive complaints in adults aging with HIV: a pilot study. *Physical &*  
9 *Occupational Therapy in Geriatrics*. 2005; 24(2): 35-51.

10  
11 Vance DE, Moneyham L, Fordham P & Struzick TC. A model of suicidal ideation in adults aging with HIV.  
12 *JANAC: Journal of the Association of Nurses in AIDS Care*. 2008; 19(5): 375-384.

13  
14 Vance DE & Robinson FP. Reconciling successful aging with HIV: a biopsychosocial overview. *Journal of*  
15 *HIV/AIDS & Social Services*. 2004; 3(1): 59-78.

16  
17  
18 Vance DE & Struzick TC. Addressing risk factors of cognitive impairment in adults aging with HIV: a social  
19 work model. *Journal of Gerontological Social Work*. 2007; 49(4): 51-77.

20  
21 Vance DE & Woodley RA. Strengths and distress in adults who are aging with HIV: a pilot study.  
22 *Psychological Reports*. 2005; 96(2): 383-386.

23  
24  
25 van de Port IG, Wood-Dauphinee S, Lindeman E & Kwakkel G. Effects of exercise training programs on  
26 walking competency after stroke: a systematic review. *Am J Phys Med Rehabil*. 2007; 86(11): 935-951.

27  
28  
29 Van Peppen RPS, Kortsmid M, Lindeman E & Kwakkel G. Effects of visual feedback therapy on postural  
30 control in bilateral standing after stroke: a systematic review. *Journal of Rehabilitation Medicine*. 2006;  
31 38(1): 3-9.

32  
33 Van Peppen RP, Kwakkel G, Wood-Dauphinee S, Hendriks HJ, Van der Wees PJ & Dekker J. The impact of  
34 physical therapy on functional outcomes after stroke: what's the evidence? *Clinical Rehabilitation*. 2004; 18  
35 (8): 833-862

36  
37  
38 van Uffelen JG, Chin A Paw MJ, Hopman-Rock M & van Mechelen W. The Effects of Exercise on Cognition in  
39 Older Adults With and Without Cognitive Decline: A Systematic Review. *Clin J Sport Med*. 2008; 18(6):486-  
40 500.

41  
42 Velthuis MJ, Agasi-Idenburg SC, Aufdemkampe G & Wittink HM. The Effect of Physical Exercise on Cancer-  
43 related Fatigue during Cancer Treatment: a Meta-analysis of Randomised Controlled Trials. *Clinical*  
44 *Oncology*. 2010; 22 (3) 208-221. DOI: 10.1016/j.clon.2009.12.005.

45  
46  
47 Walker MF, Leonardi-Bee J, Bath P, Langhorne P, Dewey M, Corr S, Drummond A, Gilbertson L, Gladman JR,  
48 Jongbloed L, Logan P & Parker C. Individual patient data meta-analysis of randomized controlled trials of  
49 community occupational therapy for stroke patients. *Stroke*. 2004; 35(9): 2226-2232. Available from:  
50 <http://stroke.ahajournals.org/content/35/9/2226>.

51  
52  
53 Warsi A, LaValley MP, Wang PS, Avorn J & Solomon DH. Arthritis self-management education programs: A  
54 meta-analysis of the effect on pain and disability. *Arthritis and Rheumatism*. 2003; 48(8): 2207-2213.

**Evidence-Informed Recommendations in Rehabilitation for Older Adults Living with HIV**

1  
2  
3 Wevers L, van de Port I, Vermue M, Mead G & Kwakkel G. Effects of Task-Oriented Circuit Class Training on  
4 Walking Competency After Stroke: A Systematic Review. *Stroke*. 2009; 40:2450-2459. Originally published  
5 online May 21, 2009 doi: 10.1161/STROKEAHA.108.541946.  
6

7  
8 Wilson K, Mottram PG & Vassilas C. Psychotherapeutic treatments for older depressed people. *Cochrane*  
9 *Database of Systematic Reviews* 2008, Issue 1. Art. No.: CD004853. DOI:  
10 10.1002/14651858.CD004853.pub2.  
11

12 Wutoh AK, Brown CM, Kumoji EK, Daftary MS, Jones T, Barnes NA & Powell NJ. Antiretroviral adherence  
13 and use of alternative therapies among older HIV-infected adults. *Journal of the National Medical*  
14 *Association*. 2001; 93(7-8): 243-250.  
15

16  
17 \*Indicates four references (interventions) that were referred to in the document but were not in the final  
18 recommendations.  
19

### Data Supplement File 3 - Characteristics of Included Studies in the Final Evidence-Informed Recommendations

#### Stream A: HIV, Aging and Rehabilitation (n= 42 studies)

| Characteristic                                                                                                                                                                                                                                               | Number (%)                                                     |
|--------------------------------------------------------------------------------------------------------------------------------------------------------------------------------------------------------------------------------------------------------------|----------------------------------------------------------------|
| <b>Total number of included studies</b> from which Stream A recommendations were derived                                                                                                                                                                     | 42                                                             |
| <b>Sample size of participants across all included studies</b> ~<br>~based on 31/42 studies reporting sample size                                                                                                                                            | 4585 participants                                              |
| <b>Mean age of study participants (years) (range)</b> +<br>+based on data from 23/42 studies                                                                                                                                                                 | 50 years (42-68 years)                                         |
| <b>Gender of participants in included studies</b> *<br>Men<br>Women<br>Transgendered<br>*based on 27/42 studies reporting gender                                                                                                                             | 2497 (71%)<br>1022 (29%)<br>10 (<1%)                           |
| <b>Country of origin of included studies</b><br>United States<br>Brazil<br>Australia<br>Not Reported                                                                                                                                                         | 38 (90%)<br>1 (2%)<br>1 (2%)<br>2 (5%)                         |
| <b>Year of Publication (Range)</b>                                                                                                                                                                                                                           | 1991-2010                                                      |
| <b>Methods of included studies</b><br>Qualitative studies<br>Quantitative studies<br>Narrative reviews / commentary / editorial                                                                                                                              | 9 (21%)<br>21 (50%)<br>12 (29%)                                |
| <b>Study Designs</b> (as classified on data extraction forms)<br>Review / narrative review<br>Cross-sectional studies<br>Survey<br>Intervention study (non-RCT)<br>Qualitative – Focus Group<br>Qualitative (other) – either cross-sectional or longitudinal | 13 (31%)<br>13 (31%)<br>8 (19%)<br>2 (5%)<br>1 (2%)<br>5 (12%) |

**Final Theme Classification of Included Studies**

|                                                                                               |          |
|-----------------------------------------------------------------------------------------------|----------|
| Overarching principles for rehabilitation of older adults with HIV                            | 2 (5%)   |
| Mental health (depression; neurocognition)                                                    | 10 (24%) |
| Determinants of Health                                                                        | 2 (5%)   |
| Uncertainty                                                                                   | 1 (2%)   |
| Physical health (aerobic capacity)                                                            | 2 (5%)   |
| Social inclusion                                                                              | 1 (2%)   |
| Spirituality                                                                                  | 4 (10%)  |
| Strategies to address health challenges for older adults with HIV<br>(lifestyle, coping, etc) | 3 (7%)   |
| Extrinsic factors that influence HIV and aging<br>(social support, stigma, etc)               | 10 (24%) |
| Personal attributes further increasing the complexity of HIV and Aging                        | 3 (7%)   |
| Interventions (exercise; neurocognitive interventions)                                        | 4 (10%)  |

**Stream B: Rehabilitation Interventions in Comorbidities (n=108 studies)**

| Characteristic                                                                                                                                                | Number (%)           |
|---------------------------------------------------------------------------------------------------------------------------------------------------------------|----------------------|
| <b>Total number of included studies</b> from which Stream B recommendations were derived                                                                      | 108                  |
| <b>Total number of individual studies / trials included in the systematic reviews and meta-analyses</b>                                                       | 2484                 |
| <b>Sample size / total number of participants across all included studies in the systematic reviews and meta-analyses*</b><br>*as reported in 102/108 studies | 179,777 participants |
| <b>Year of publication (range)</b>                                                                                                                            | 1992-2011            |
| <b>Type of comorbidity in included studies</b>                                                                                                                |                      |
| Bone and joint disorders                                                                                                                                      | 11 (10%)             |
| Cancer                                                                                                                                                        | 12 (11%)             |
| Stroke                                                                                                                                                        | 31 (29%)             |
| Cardiovascular disease                                                                                                                                        | 16 (15%)             |
| Mental Health                                                                                                                                                 | 4 (4%)               |
| Cognitive Impairment                                                                                                                                          | 10 (9%)              |
| Chronic Obstructive Pulmonary Disease (COPD)                                                                                                                  | 7 (6%)               |
| Diabetes                                                                                                                                                      | 4 (4%)               |
| Older Adults                                                                                                                                                  | 11 (10%)             |
| HIV                                                                                                                                                           | 2 (2%)               |
| <b>Study Design of Included Studies</b>                                                                                                                       |                      |
| Cochrane systematic review*                                                                                                                                   | 36 (33%)             |
| Meta-analysis                                                                                                                                                 | 21 (19%)             |
| Systematic review or Clinical Practice Guideline (CPG)*                                                                                                       | 24 (22%)             |
| Systematic review and meta-analysis                                                                                                                           | 27 (25%)             |
| *Published by the Cochrane Collaboration/Wiley and/or follows Cochrane Collaboration protocol                                                                 |                      |

**Intervention Focus of Included Studies**

|                             |    |       |
|-----------------------------|----|-------|
| Biofeedback                 | 1  | (1%)  |
| Education                   | 1  | (1%)  |
| Electrical Stimulation      | 2  | (2%)  |
| Exercise                    | 63 | (58%) |
| Fall Prevention             | 1  | (1%)  |
| Housing Models              | 1  | (1%)  |
| Inspiratory Muscle Training | 1  | (1%)  |
| Mobilization                | 1  | (1%)  |
| Models of Care              | 1  | (1%)  |
| Occupational Therapy        | 4  | (4%)  |
| Prevention Programs         | 1  | (1%)  |
| Psychotherapy               | 1  | (1%)  |
| Rehabilitation              | 27 | (25%) |
| Self-Management Programs    | 1  | (1%)  |
| Strength Training           | 1  | (1%)  |
| Visual Feedback Therapy     | 1  | (1%)  |



## The COGS Checklist for Reporting Clinical Practice Guidelines

Shiffman RN, Shekelle P, Overhage M, Slutsky J, Grimshaw J, Deshpande SM. Standardized Reporting of Clinical Practice Guidelines: A Proposal from the Conference on Guideline Standardization *Ann Intern Med.* 2003;139:493-498.

| Topic                                | Description                                                                                                                                                                                                                                                                                                                                               | Reported on Page #             |
|--------------------------------------|-----------------------------------------------------------------------------------------------------------------------------------------------------------------------------------------------------------------------------------------------------------------------------------------------------------------------------------------------------------|--------------------------------|
| 1. Overview material                 | Provide a structured abstract that includes the guideline's release date, status (original, revised, updated), and print and electronic sources.                                                                                                                                                                                                          | Page 3                         |
| 2. Focus                             | Describe the primary disease/condition and intervention/service/technology that the guideline addresses. Indicate any alternative preventive, diagnostic or therapeutic interventions that were considered during development.                                                                                                                            | Page 6-7                       |
| 3. Goal                              | Describe the goal that following the guideline is expected to achieve, including the rationale for development of a guideline on this topic.                                                                                                                                                                                                              | Page 6-7                       |
| 4. Users / setting                   | Describe the intended users of the guideline (e.g., provider types, patients) and the settings in which the guideline is intended to be used.                                                                                                                                                                                                             | Page 20-21                     |
| 5. Target population                 | Describe the patient population eligible for guideline recommendations and list any exclusion criteria.                                                                                                                                                                                                                                                   | Page 7-9                       |
| 6. Developer                         | Identify the organization(s) responsible for guideline development and the names/credentials/potential conflicts of interest of individuals involved in the guideline's development.                                                                                                                                                                      | Page 8; 25-26 (and title page) |
| 7. Funding source / sponsor          | Identify the funding source/sponsor and describe its role in developing and/or reporting the guideline. Disclose potential conflict of interest.                                                                                                                                                                                                          | Page 26-27                     |
| 8. Evidence collection               | Describe the methods used to search the scientific literature, including the range of dates and databases searched, and criteria applied to filter the retrieved evidence.                                                                                                                                                                                | Page 8-10                      |
| 9. Recommendation grading criteria   | Describe the criteria used to rate the quality of evidence that supports the recommendations and the system for describing the strength of the recommendations. Recommendation strength communicates the importance of adherence to a recommendation and is based on both the quality of the evidence and the magnitude of anticipated benefits or harms. | Page 10-13                     |
| 10. Method for synthesizing evidence | Describe how evidence was used to create recommendations, e.g., evidence tables, meta-analysis, decision analysis.                                                                                                                                                                                                                                        | Page 10-14                     |
| 11. Pre-release review               | Describe how the guideline developer reviewed and/or tested the guidelines prior to release.                                                                                                                                                                                                                                                              | Page 15-16                     |

|                                   |                                                                                                                                                                                                                                                                                                                        |                                                  |
|-----------------------------------|------------------------------------------------------------------------------------------------------------------------------------------------------------------------------------------------------------------------------------------------------------------------------------------------------------------------|--------------------------------------------------|
| 12. Update plan                   | State whether or not there is a plan to update the guideline and, if applicable, an expiration date for this version of the guideline                                                                                                                                                                                  | Page 25 (statement of ongoing revision required) |
| 13. Definitions                   | Define unfamiliar terms and those critical to correct application of the guideline that might be subject to misinterpretation.                                                                                                                                                                                         | Page 6, 8 (disability and rehabilitation)        |
| 14. Recommendations and rationale | State the recommended action precisely and the specific circumstances under which to perform it. Justify each recommendation by describing the linkage between the recommendation and its supporting evidence. Indicate the quality of evidence and the recommendation strength, based on the criteria described in 9. | Data Supplement File 2                           |
| 15. Potential benefits and harms  | Describe anticipated benefits and potential risks associated with implementation of guideline recommendations.                                                                                                                                                                                                         | Page 20-21                                       |
| 16. Patient Preferences           | Describe the role of patient preferences when a recommendation involves a substantial element of personal choice or values.                                                                                                                                                                                            | Page 20-22                                       |
| 17. Algorithm                     | Provide (when appropriate) a graphical description of the stages and decisions in clinical care described by the guideline.                                                                                                                                                                                            | Figures 1-3                                      |
| 18. Implementation considerations | Describe anticipated barriers to application of the recommendations. Provide reference to any auxiliary documents for providers or patients that are intended to facilitate implementation. Suggest review criteria for measuring changes in care when the guideline is implemented.                                   | Page 20-25 (Discussion)                          |
